# Supplementary material for: Whole-Genome Resequencing and Pan-Transcriptome Reconstruction Highlight the Impact of Genomic Structural Variation on Secondary Metabolite Gene Clusters in the Grapevine Esca Pathogen Phaeoacremonium minimum
Source: Front Microbiol. 2018 Aug 13;9:1784. doi: 10.3389/fmicb.2018.01784 (PMC6099105; doi:10.3389/fmicb.2018.01784)
Supplement: DATA S8 — (A) Deletion events identified by the three SV-callers (A), genes entirely (B) and partially (C) deleted and their corresponding enriched functional categories (P-value < 0.01; D and E, respectively). [file Data_Sheet_8.XLSX]

## Sheet: A - Deletions
Deletion events							Genomic features								NUCmer							DELLY2													LUMPY
Unitig	Start	End	UCR-PA7	Pm1118	Pm448	Pm449	SV length (bp)	Start gene	End gene	Middle gene	Gene Part(s)	Entire gene(s)	Gene part(s)	Entire gene(s)	Unitig	Start	End	UCR-PA7	Pm1118	Pm448	Pm449	Unitig	POS	ID	REF	ALT	QUAL	FILTER	INFO	FORMAT	UCR-PA7	Pm1118	Pm448	Pm 449	Unitig	POS	ID	REF	ALT	QUAL	FILTER	INFO	FORMAT	UCR-PA7	Pm1118	Pm448	Pm 449
unitig_0	86717	87496	DEL	-	-	DEL	779	0	0	0	0	0			unitig_0	86717	87496	PA7_GAP	-	-	PM449_GAP	unitig_0	86713	DEL00000006	A	<DEL>	.	PASS	PRECISE;SVTYPE=DEL;SVMETHOD=EMBL.DELLYv0.7.7;CHR2=unitig_0;END=87492;PE=59;MAPQ=60;CT=3to5;CIPOS=-5,5;CIEND=-5,5;INSLEN=0;HOMLEN=5;SR=10;SRQ=0.991228;CONSENSUS=CCGTAGTGTCCGGGGTTTTCCAAGTATCCCAGTTGTCAGAATGCTCTGGAGTATCAAAATGCGTACTTTTAACCTCATGCTTACTCTGCTTTTTTGGTCTGTCCCGGTGCAAG;CE=1.9621	GT:GL:GQ:FT:RCL:RC:RCR:CN:DR:DV:RR:RV	1/1:-62.398,-5.11547,0:51:PASS:117:0:110:0:0:61:0:17	0/0:0,-5.4158,-63.4973:54:PASS:39:67:81:1:22:1:18:0	0/0:0,-4.21274,-50.5983:42:PASS:42:44:45:1:15:0:14:0	1/1:-251.091,-21.0628,0:10000:PASS:256:0:230:0:0:115:0:70	unitig_0	86716	4	N	<DEL>	.	.	SVTYPE=DEL;STRANDS=+-:238;SVLEN=-780;END=87496;CIPOS=0,0;CIEND=0,0;CIPOS95=0,0;CIEND95=0,0;SU=238;PE=178;SR=60	GT:SU:PE:SR	./.:71:61:10	./.:1:1:0	./.:0:0:0	./.:166:116:50
unitig_0	339066	344284	DEL	-	DEL	-	5218	0	0	0	0	1		TM1119_g115	unitig_0	339066	344284	PA7_GAP	-	PM448_GAP	-	unitig_0	338980	DEL00000027	T	<DEL>	.	PASS	PRECISE;SVTYPE=DEL;SVMETHOD=EMBL.DELLYv0.7.7;CHR2=unitig_0;END=344281;PE=16;MAPQ=60;CT=3to5;CIPOS=-1,1;CIEND=-1,1;INSLEN=0;HOMLEN=0;SR=10;SRQ=0.961326;CONSENSUS=ATATGCATATCAAGACGTTGTTGTGCCTATGGTCGACGGATTCGTCGTCCAACCAATGGAGGCTACCAAGGTGGACAATGAGCTTCCTTATCCTGTTGCGTGTCCCGAAATTTACTCTTCCCAACCCCAGTCGCTCACCCAACCCCTCACTACTTTACTCAGTCACTAGACAGTCCCTAC;CE=1.97243	GT:GL:GQ:FT:RCL:RC:RCR:CN:DR:DV:RR:RV	1/1:-66.6943,-6.01492,0:60:PASS:725:0:751:0:0:68:0:20	0/0:0,-5.1154,-61.8979:51:PASS:418:713:394:2:20:0:17:0	1/1:-71.0974,-6.01801,0:60:PASS:505:0:525:0:0:16:0:20	0/0:0,-19.2561,-225.49:10000:PASS:1449:2994:1397:2:97:0:64:0	unitig_0	338986	1	N	<DEL>	.	.	SVTYPE=DEL;STRANDS=+-:105;SVLEN=-5298;END=344284;CIPOS=0,3;CIEND=-2,0;CIPOS95=0,1;CIEND95=0,0;IMPRECISE;SU=105;PE=84;SR=21	GT:SU:PE:SR	./.:73:68:5	./.:0:0:0	./.:32:16:16	./.:0:0:0
unitig_0	435815	436021	-	-	DEL	DEL	206	0	0	0	0	0			unitig_0	435815	436021	-	-	PM448_GAP	PM449_GAP	unitig_0	435809	DEL00000037	CTTCTCAACCGAGACTACTGGTCGCGGTTATGGGTCATTCAGGAATTTGCTCTTGCAAGAGATCTCTACATCATATACAACAGCGAATTTATACCATTCTTTCACCTTGACTACTTCATTGAGTGGGGCTGGATGGCTAACCTGCTGTACAAAAACGTCACTCGGCAACAATCACACGCGTTGAATCACTGAAAAGGTGGGCTCTTCAACAAG	C	.	PASS	PRECISE;SVTYPE=DEL;SVMETHOD=EMBL.DELLYv0.7.7;CHR2=unitig_0;END=436022;PE=0;MAPQ=60;CT=3to5;CIPOS=-7,7;CIEND=-7,7;INSLEN=0;HOMLEN=7;SR=10;SRQ=1;CONSENSUS=TCAGTGTGCAATTGGCAAAGAAAAAATTCCAGGTTCCGTGTGTGGAGAATGCACTTCAAAACATTGGTAGGCTTCTCTAGAAACCAAAGTTTCCACGCCCTCATCGAGTTTCGTTGGCTTACGTGTCTCGGTCGTCAGGACAAGGCAAACTTGTTATCCGT;CE=1.99459	GT:GL:GQ:FT:RCL:RC:RCR:CN:DR:DV:RR:RV	0/0:0,-2.40695,-28.7987:24:PASS:2751:5789:2630:2:0:0:8:0	0/0:0,-3.91161,-46.3982:39:PASS:1832:4343:1544:3:0:0:13:0	1/1:-81.1958,-6.91948,0:69:PASS:1376:61:3733:0:0:0:0:23	1/1:-231.692,-19.2574,0:10000:PASS:7570:256:7603:0:0:0:0:64	unitig_0	435814	11	N	<DEL>	.	.	SVTYPE=DEL;STRANDS=+-:77;SVLEN=-207;END=436021;CIPOS=0,0;CIEND=0,0;CIPOS95=0,0;CIEND95=0,0;SU=77;PE=1;SR=76	GT:SU:PE:SR	./.:0:0:0	./.:0:0:0	./.:22:0:22	./.:55:1:54
unitig_0	566538	567058	-	-	-	DEL	520	0	0	0	0	0			unitig_0	566538	567058	-	-	-	PM449_GAP	unitig_0	566537	DEL00000047	G	<DEL>	.	PASS	PRECISE;SVTYPE=DEL;SVMETHOD=EMBL.DELLYv0.7.7;CHR2=unitig_0;END=567054;PE=91;MAPQ=60;CT=3to5;CIPOS=-1,1;CIEND=-1,1;INSLEN=0;HOMLEN=0;SR=10;SRQ=0.975758;CONSENSUS=TAGGCGTTCTCCAATATCTAGGCCACATAGTTGATCATGTTTGCCCAACCATTTCTCTGCGGAGAATGTCTTCCGTAGCACCAATATGAAGCCCTTTGCTGCTATCTCCGCCGTGGTCTACCTGGCAGCTATCGCACAGGGAGCCAATGTCAAAATCTGCAAG;CE=1.9914	GT:GL:GQ:FT:RCL:RC:RCR:CN:DR:DV:RR:RV	0/0:0,-3.0076,-34.2973:30:PASS:59:114:65:2:30:0:10:0	0/0:0,-5.115,-59.7975:51:PASS:27:73:55:2:22:0:17:0	0/0:0,-7.52171,-88.196:75:PASS:30:98:93:2:18:0:25:0	1/1:-264.191,-21.9658,0:10000:PASS:155:0:140:0:0:92:0:73	unitig_0	566537	15	N	<DEL>	.	.	SVTYPE=DEL;STRANDS=+-:131;SVLEN=-525;END=567062;CIPOS=0,0;CIEND=0,0;CIPOS95=0,0;CIEND95=0,0;SU=131;PE=85;SR=46	GT:SU:PE:SR	./.:0:0:0	./.:0:0:0	./.:0:0:0	./.:131:85:46
unitig_0	648299	651375	-	DEL	-	-	3076	0	0	0	0	1		TM1119_g222	unitig_0	648299	651375	-	PM1118_GAP	-	-	unitig_0	648289	DEL00000053	A	<DEL>	.	PASS	PRECISE;SVTYPE=DEL;SVMETHOD=EMBL.DELLYv0.7.7;CHR2=unitig_0;END=651378;PE=130;MAPQ=60;CT=3to5;CIPOS=-10,10;CIEND=-10,10;INSLEN=0;HOMLEN=11;SR=10;SRQ=0.993827;CONSENSUS=AACCTGACTTAACTTTACCGAACAATTCGATGCTACCGGTAATTGAATGAATGCAGTGCAGCACGCAGCAGACCACCCTCGGCCCCGTAATCGCGAACGCGGTGGGTTCTTCTCCTCTCCTTGCCGTGCCGAGCCGTGCAGGAAGGACGAACAAGATGGCGC;CE=1.9835	GT:GL:GQ:FT:RCL:RC:RCR:CN:DR:DV:RR:RV	./.:0,0,0:0:LowQual:450:35:410:0:0:51:0:0	1/1:-201.794,-13.9524,0:140:PASS:847:8:771:0:0:72:1:56	1/1:-289.184,-24.9696,0:10000:PASS:1154:0:977:0:0:132:0:83	0/0:0,-0.299938,-2.59891:5:LowQual:776:218:790:0:0:77:1:0	unitig_0	648292	17	N	<DEL>	.	.	SVTYPE=DEL;STRANDS=+-:507;SVLEN=-3085;END=651377;CIPOS=0,0;CIEND=0,0;CIPOS95=0,0;CIEND95=0,0;SU=507;PE=338;SR=169	GT:SU:PE:SR	./.:64:51:13	./.:120:72:48	./.:204:138:66	./.:119:77:42
unitig_0	648299	651377	-	-	DEL	-	3078	0	0	0	0	1		TM1119_g222	unitig_0	648299	651377	-	-	PM448_GAP	-	unitig_0	648289	DEL00000053	A	<DEL>	.	PASS	PRECISE;SVTYPE=DEL;SVMETHOD=EMBL.DELLYv0.7.7;CHR2=unitig_0;END=651378;PE=130;MAPQ=60;CT=3to5;CIPOS=-10,10;CIEND=-10,10;INSLEN=0;HOMLEN=11;SR=10;SRQ=0.993827;CONSENSUS=AACCTGACTTAACTTTACCGAACAATTCGATGCTACCGGTAATTGAATGAATGCAGTGCAGCACGCAGCAGACCACCCTCGGCCCCGTAATCGCGAACGCGGTGGGTTCTTCTCCTCTCCTTGCCGTGCCGAGCCGTGCAGGAAGGACGAACAAGATGGCGC;CE=1.9835	GT:GL:GQ:FT:RCL:RC:RCR:CN:DR:DV:RR:RV	./.:0,0,0:0:LowQual:450:35:410:0:0:51:0:0	1/1:-201.794,-13.9524,0:140:PASS:847:8:771:0:0:72:1:56	1/1:-289.184,-24.9696,0:10000:PASS:1154:0:977:0:0:132:0:83	0/0:0,-0.299938,-2.59891:5:LowQual:776:218:790:0:0:77:1:0	unitig_0	648292	17	N	<DEL>	.	.	SVTYPE=DEL;STRANDS=+-:507;SVLEN=-3085;END=651377;CIPOS=0,0;CIEND=0,0;CIPOS95=0,0;CIEND95=0,0;SU=507;PE=338;SR=169	GT:SU:PE:SR	./.:64:51:13	./.:120:72:48	./.:204:138:66	./.:119:77:42
unitig_0	664639	664914	-	DEL	-	DEL	275	0	0	0	0	0			unitig_0	664639	664914	PA7_GAP	PM1118_GAP	PM448_GAP	PM449_GAP	unitig_0	664634	DEL00000056	ACTGACGTGCCCAGACGGAGGCGTTCTTTTTGGGTGCCAAACAATCCAGGTAAAAACAGTCTTGAGTAGTGAGAGTTTGGGGAAGGAGATGCCTCGCATTCCATTGTTTATCACTTGGAAGGAAGGAGCAAACCCTTTCCGCCTACATAGCAACTTCAATTCGATTTTGAGAAACGACCTCGAATTTTGCAACGAAGTCAACACCGTTTTGTCCACTTTCGGCGTAAAATCCAAAATCTGAGTCATTACTATTTGTCGCTAGTCACGGCGTGTTTG	A	.	PASS	PRECISE;SVTYPE=DEL;SVMETHOD=EMBL.DELLYv0.7.7;CHR2=unitig_0;END=664910;PE=0;MAPQ=60;CT=3to5;CIPOS=-4,4;CIEND=-4,4;INSLEN=0;HOMLEN=4;SR=10;SRQ=0.96875;CONSENSUS=GCGGTTACAAATGTCAAATCTGCTCAAGTGAAGGTCGGCGGAAAGTCGTGTTTGTATTGCAAGCCATCTGAGTGTGACTGCACCAAGGTATTGATAGGCCAGCTTGAAAACTTTCACATTTCTTTCAAATAACAATTTTCAATATAATCGGCGATGGAATCAACTATGTTTTCAGGCTTTACTTGATAAT;CE=1.96209	GT:GL:GQ:FT:RCL:RC:RCR:CN:DR:DV:RR:RV	./.:0,0,0:0:LowQual:4032:105:2902:0:0:0:0:0	1/1:-58.698,-4.81449,0:48:PASS:3047:150:1239:0:0:0:0:16	./.:0,0,0:0:LowQual:4487:85:1358:0:0:0:0:0	1/1:-228.993,-18.6574,0:10000:PASS:9316:0:9197:0:0:0:0:62	unitig_0	664630	18	N	<DEL>	.	.	SVTYPE=DEL;STRANDS=+-:62;SVLEN=-284;END=664914;CIPOS=-2,9;CIEND=0,0;CIPOS95=0,0;CIEND95=0,0;SU=62;PE=3;SR=59	GT:SU:PE:SR	./.:4:0:4	./.:7:0:7	./.:17:2:15	./.:34:1:33
unitig_0	778870	779013	-	-	-	DEL	143	0	0	0	0	0			unitig_0	778870	779013	-	-	-	PM449_GAP	unitig_0	778869	DEL00000066	CCTGCTTCAATTGCGACACTGGTTGTATATACACTATCTTTATCTTAAGAATTTCGATTCTCTTTCATCCTTGAGAAGGAGGCGTTTTCGCTGTTTGACGAATCAAGCCATTTGAACAAGACTGGCCGTTTTGCACAGTTTTGTT	C	.	PASS	PRECISE;SVTYPE=DEL;SVMETHOD=EMBL.DELLYv0.7.7;CHR2=unitig_0;END=779014;PE=0;MAPQ=60;CT=3to5;CIPOS=-2,2;CIEND=-2,2;INSLEN=0;HOMLEN=1;SR=10;SRQ=0.987879;CONSENSUS=ATAGGTTTAGGGAACAGATGAATATCTCGAATCGCCGAACAAAAGGGAATGCCGAAGATGGTCGAGGTGATAATCGATCAGCTCGGCAAGGCAGCTTTTGCGGCAGAGCGGTTGTATGGATAACAGTCAAGCAGACAATATCAATCATTCATTTGAATTGAGTTT;CE=1.96043	GT:GL:GQ:FT:RCL:RC:RCR:CN:DR:DV:RR:RV	0/0:0,-5.11546,-61.798:51:PASS:1568:3840:1492:3:0:0:17:0	0/0:0,-4.51308,-53.4976:45:PASS:1110:2764:1353:2:0:0:15:0	0/0:0,-3.91203,-48.0986:39:PASS:784:1751:1626:1:0:0:13:0	1/1:-302.287,-25.274,0:10000:PASS:3491:60:5348:0:0:0:0:84	unitig_0	778869	21	N	<DEL>	.	.	SVTYPE=DEL;STRANDS=+-:60;SVLEN=-144;END=779013;CIPOS=0,0;CIEND=0,0;CIPOS95=0,0;CIEND95=0,0;SU=60;PE=0;SR=60	GT:SU:PE:SR	./.:0:0:0	./.:0:0:0	./.:0:0:0	./.:60:0:60
unitig_0	910513	910688	DEL	-	DEL	DEL	175	0	0	0	0	0			unitig_0	910513	910688	PA7_GAP	-	PM448_GAP	PM449_GAP	unitig_0	910511	DEL00000075	GGGTTACTAAGACCAGTCTGTCGCACTTGACACCAACAACCGCATCATCCACTACTTCGACTACAGATTCCAGCAGCGTTGTTTCGCCCTCAACCACAGCTGCACCGACACCCACACAATCATCCACTAGGAAATCAAGTAGCAGTGGAAGTTCAGCGTCTTCTAGGGAGACCTGTTT	G	.	PASS	PRECISE;SVTYPE=DEL;SVMETHOD=EMBL.DELLYv0.7.7;CHR2=unitig_0;END=910689;PE=0;MAPQ=60;CT=3to5;CIPOS=-2,2;CIEND=-2,2;INSLEN=0;HOMLEN=1;SR=10;SRQ=0.972973;CONSENSUS=CTTCCGACGAAATCAATCCATTTACTACAGGTACGCAACAGTCTCCTAGGAATACGGCGGAGCTTGTTGGCATCATAATTGGAATCCTTGGCCTTATCATTGCAATTTTGA;CE=1.98369	GT:GL:GQ:FT:RCL:RC:RCR:CN:DR:DV:RR:RV	1/1:-76.7975,-6.31913,0:63:PASS:1979:26:1415:0:0:0:0:21	0/0:0,-6.61928,-77.9966:66:PASS:1718:5623:2339:3:0:0:22:0	1/1:-39.7985,-3.30978,0:33:PASS:1233:13:402:0:0:0:0:11	1/1:-233.591,-16.9598,0:10000:PASS:4131:192:6652:0:0:0:1:66	unitig_0	910512	23	N	<DEL>	.	.	SVTYPE=DEL;STRANDS=+-:50;SVLEN=-176;END=910688;CIPOS=0,0;CIEND=0,0;CIPOS95=0,0;CIEND95=0,0;SU=50;PE=0;SR=50	GT:SU:PE:SR	./.:9:0:9	./.:0:0:0	./.:6:0:6	./.:35:0:35
unitig_0	934342	934523	-	-	DEL	DEL	181	0	0	0	0	0			unitig_0	934342	934523	-	-	PM448_GAP	PM449_GAP	unitig_0	934341	DEL00000079	ATATATGACTAACATGGGGGGTGTCCTGTTTCTCTGACAGGCCATTCTGTGGTTCGTCACAGGCGAGGTGAAGACATTATTATGTCTTGCATGATGTAGCCAGGTTCTCGACGATTGGGCAGGACAATGAGCACGTCAAAACATAAAACCAGCAAGAGTGATTAGTATATGGCTTTAAACAAG	A	.	PASS	PRECISE;SVTYPE=DEL;SVMETHOD=EMBL.DELLYv0.7.7;CHR2=unitig_0;END=934524;PE=0;MAPQ=60;CT=3to5;CIPOS=-4,4;CIEND=-4,4;INSLEN=0;HOMLEN=3;SR=10;SRQ=0.980198;CONSENSUS=TGTCACTTGAAGAATCGTTTGTGGCGCCTTTACTTATCTCAGGATCATGATACAATCCCGACTTTTGATTGATAGACTTGTTCTAATATTATATCTTGCTTTGCTCTGAAAATTAAGTGTCTACATATTCTTCGGAATAACATGGCACAATCGACAACATCAATAAAGATGAAACAGCCGTAGGAGGACAAACCTGCTCGGT;CE=1.9582	GT:GL:GQ:FT:RCL:RC:RCR:CN:DR:DV:RR:RV	0/0:0,-5.11462,-60.0971:51:PASS:1930:3812:2350:2:0:0:17:0	0/0:0,-5.71791,-71.7983:57:PASS:2703:4581:1658:2:0:0:19:0	1/1:-64.2973,-5.41584,0:54:PASS:2618:20:2062:0:0:0:0:18	1/1:-207.394,-16.8519,0:10000:PASS:6423:49:5510:0:0:0:0:56	unitig_0	934341	24	N	<DEL>	.	.	SVTYPE=DEL;STRANDS=+-:53;SVLEN=-182;END=934523;CIPOS=0,0;CIEND=0,0;CIPOS95=0,0;CIEND95=0,0;SU=53;PE=0;SR=53	GT:SU:PE:SR	./.:0:0:0	./.:0:0:0	./.:10:0:10	./.:43:0:43
unitig_0	938582	943846	-	-	DEL	-	5264	0	0	0	0	2		TM1119_g322;TM1119_g323	unitig_0	938582	943846	-	-	PM448_GAP		unitig_0	938582	DEL00000080	T	<DEL>	.	PASS	IMPRECISE;SVTYPE=DEL;SVMETHOD=EMBL.DELLYv0.7.7;CHR2=unitig_0;END=943857;PE=60;MAPQ=60;CT=3to5;CIPOS=-109,109;CIEND=-109,109	GT:GL:GQ:FT:RCL:RC:RCR:CN:DR:DV:RR:RV	1/1:-157.1,-8.42877,0:84:PASS:661:15:692:0:0:28:0:0	0/0:0,-3.61235,-72:36:PASS:403:855:429:2:12:0:0:0	1/1:-22.9,-1.20412,0:12:LowQual:385:17:723:0:0:4:0:0	1/1:-313.692,-18.0541,0:10000:PASS:1580:108:1393:0:0:60:0:0	unitig_0	938580	25	N	<DEL>	.	.	SVTYPE=DEL;STRANDS=+-:93;SVLEN=-5276;END=943856;CIPOS=-5,242;CIEND=-278,9;CIPOS95=-1,98;CIEND95=-96,0;IMPRECISE;SU=93;PE=93;SR=0	GT:SU:PE:SR	./.:28:28:0	./.:0:0:0	./.:4:4:0	./.:61:61:0
unitig_0	938582	943856	DEL	-	-	-	5274	0	0	0	0	2		TM1119_g322;TM1119_g323	unitig_0	938582	943856	PA7_GAP	-	-	-	unitig_0	938582	DEL00000080	T	<DEL>	.	PASS	IMPRECISE;SVTYPE=DEL;SVMETHOD=EMBL.DELLYv0.7.7;CHR2=unitig_0;END=943857;PE=60;MAPQ=60;CT=3to5;CIPOS=-109,109;CIEND=-109,109	GT:GL:GQ:FT:RCL:RC:RCR:CN:DR:DV:RR:RV	1/1:-157.1,-8.42877,0:84:PASS:661:15:692:0:0:28:0:0	0/0:0,-3.61235,-72:36:PASS:403:855:429:2:12:0:0:0	1/1:-22.9,-1.20412,0:12:LowQual:385:17:723:0:0:4:0:0	1/1:-313.692,-18.0541,0:10000:PASS:1580:108:1393:0:0:60:0:0	unitig_0	938580	25	N	<DEL>	.	.	SVTYPE=DEL;STRANDS=+-:93;SVLEN=-5276;END=943856;CIPOS=-5,242;CIEND=-278,9;CIPOS95=-1,98;CIEND95=-96,0;IMPRECISE;SU=93;PE=93;SR=0	GT:SU:PE:SR	./.:28:28:0	./.:0:0:0	./.:4:4:0	./.:61:61:0
unitig_0	944426	944572	DEL	-	-	-	146	0	0	0	0	0			unitig_0	944426	944572	PA7_GAP	-	-	-	unitig_0	944419	DEL00000081	TTCTCTGTCTAATTTTGAGTTATCTTCAACATATCTTTTTTCGGAGTTGGCTTGTTCTCCTTGCAGAAATTATTCCCGATTTCAACTGTGCAAGCTCCCACCAAGCAAGTATGGAACTATTTAAAAGGGGTTTCAATGGGAAAAGAGCG	T	.	PASS	PRECISE;SVTYPE=DEL;SVMETHOD=EMBL.DELLYv0.7.7;CHR2=unitig_0;END=944568;PE=0;MAPQ=60;CT=3to5;CIPOS=-6,6;CIEND=-6,6;INSLEN=0;HOMLEN=5;SR=10;SRQ=0.956897;CONSENSUS=GAAAATCCAACTCAATCTAGTGATTAGGCATTAAAAACGAATGATATATCCTCTGCCCCATGTTTCAATAGACGCAGTGTTTCCGATGCATTACTTCGACGAATCGACAATCAACC;CE=1.94957	GT:GL:GQ:FT:RCL:RC:RCR:CN:DR:DV:RR:RV	1/1:-91.5942,-7.82094,0:78:PASS:1801:108:1803:0:0:0:0:26	0/0:0,-3.61092,-43.7986:36:PASS:1367:1906:1461:1:0:0:12:0	0/0:0,-6.01803,-71.7974:60:PASS:2170:3309:3769:1:0:0:20:0	0/0:0,-18.9587,-233.094:10000:PASS:7408:12651:6328:2:0:0:63:0	unitig_0	944425	26	N	<DEL>	.	.	SVTYPE=DEL;STRANDS=+-:8;SVLEN=-147;END=944572;CIPOS=-10,9;CIEND=-10,9;CIPOS95=0,0;CIEND95=0,0;SU=8;PE=0;SR=8	GT:SU:PE:SR	./.:8:0:8	./.:0:0:0	./.:0:0:0	./.:0:0:0
unitig_0	1108416	1110082	-	-	DEL	-	1666	1	0	0	1	0	TM1119_g377		unitig_0	1108416	1110082	-	-	PM448_GAP	-	unitig_0	1108415	DEL00000088	T	<DEL>	.	PASS	PRECISE;SVTYPE=DEL;SVMETHOD=EMBL.DELLYv0.7.7;CHR2=unitig_0;END=1110083;PE=5;MAPQ=60;CT=3to5;CIPOS=-1,1;CIEND=-1,1;INSLEN=0;HOMLEN=0;SR=7;SRQ=0.981132;CONSENSUS=TAGCAACCTTCCGTCGCTCGCGACGCAGTAATACATCGCAGTCGCTGTCACTATCTTCGTGTTACTCAAGACCTTCAAACAGGCATCCCTATCATTTCTAGGAAGTCTAGGGCCGTTCCCTCAGCGCATACCCTCAGTATACCTCCAACGAACAGAATA;CE=1.96892	GT:GL:GQ:FT:RCL:RC:RCR:CN:DR:DV:RR:RV	./.:0,0,0:0:LowQual:203:437:233:2:59:0:0:0	0/0:0,-2.10606,-25.0988:21:PASS:101:202:80:2:17:0:7:0	1/1:-23.5983,-2.1055,0:21:PASS:44:2:70:0:0:6:0:7	0/0:0,-9.32808,-111.396:93:PASS:446:596:443:1:98:0:31:0	unitig_0	1108415	35	N	<DEL>	.	.	SVTYPE=DEL;STRANDS=+-:10;SVLEN=-1667;END=1110082;CIPOS=-10,9;CIEND=-9,6;CIPOS95=0,0;CIEND95=0,0;SU=10;PE=6;SR=4	GT:SU:PE:SR	./.:0:0:0	./.:0:0:0	./.:10:6:4	./.:0:0:0
unitig_0	1108823	1109301	-	-	-	DEL	478	1	0	0	1	0	TM1119_g377		unitig_0	1108823	1109301	-	-	-	PM449_GAP	unitig_0	1108822	DEL00000089	A	<DEL>	.	PASS	PRECISE;SVTYPE=DEL;SVMETHOD=EMBL.DELLYv0.7.7;CHR2=unitig_0;END=1109302;PE=96;MAPQ=60;CT=3to5;CIPOS=-2,2;CIEND=-2,2;INSLEN=0;HOMLEN=2;SR=10;SRQ=0.993902;CONSENSUS=AAACACTTGGAGAAGGCTTAAAGAAGATCTGTCTCCCAAATATGGACTGAAATAATCATTATACTTGTTATTCACCAGGTAACCACATGACCTTGGCCAGACTATAGTTCTCAAAGGTCTGCCGCTCTGAGTCAGTGGCATTGGCAAATGGCGTGAAATACCCT;CE=1.98125	GT:GL:GQ:FT:RCL:RC:RCR:CN:DR:DV:RR:RV	0/0:0,-4.81311,-55.1966:48:PASS:5604:11892:6293:2:57:0:16:0	0/0:0,-4.21253,-51.0981:42:PASS:4921:9078:3687:2:23:0:14:0	./.:0,0,0:0:LowQual:150:0:55:0:0:0:0:0	1/1:-240.692,-19.8602,0:10000:PASS:17385:44:16679:0:0:96:0:66	unitig_0	1108822	34	N	<DEL>	.	.	SVTYPE=DEL;STRANDS=+-:123;SVLEN=-479;END=1109301;CIPOS=0,0;CIEND=0,0;CIPOS95=0,0;CIEND95=0,0;SU=123;PE=82;SR=41	GT:SU:PE:SR	./.:0:0:0	./.:0:0:0	./.:0:0:0	./.:123:82:41
unitig_0	1118185	1119008	-	DEL	-	-	823	0	0	1	1	0	TM1119_g379		unitig_0	1118185	1119008	-	PM1118_GAP	-	-	unitig_0	1118183	DEL00000091	A	<DEL>	.	PASS	PRECISE;SVTYPE=DEL;SVMETHOD=EMBL.DELLYv0.7.7;CHR2=unitig_0;END=1119009;PE=17;MAPQ=60;CT=3to5;CIPOS=-2,2;CIEND=-2,2;INSLEN=0;HOMLEN=2;SR=10;SRQ=0.966387;CONSENSUS=CGGACCCTTGTCCATGAAACGCTCAGCAAGGGCTGGATATCCGCATCGATGGATCACCGTCTTCTTCCTGAGACTTCGATCGACGACCAGCTAGAAGATGTACGGGACGTTGAAATAAGATTCGAGAGGAGTAAGGATTTTGCGCATAATTAATGCGCAAGGAGATTCTTGGGGAAAGCGTAAGCTCTGCTCTGGATTACAATAGGTTTTCCCTCTCCGTTCCTCAATATCAGATAT…	GT:GL:GQ:FT:RCL:RC:RCR:CN:DR:DV:RR:RV	0/0:0,-6.01765,-71.7971:60:PASS:107:203:113:2:64:0:20:0	1/1:-41.4991,-3.3104,0:33:PASS:48:1:56:0:0:17:0:11	0/0:0,-1.50444,-17.4993:15:PASS:66:123:54:2:25:0:5:0	0/0:0,-21.0638,-257.092:10000:PASS:224:498:258:2:121:0:70:0	unitig_0	1118184	37	N	<DEL>	.	.	SVTYPE=DEL;STRANDS=+-:22;SVLEN=-824;END=1119008;CIPOS=-10,9;CIEND=-6,2;CIPOS95=0,0;CIEND95=0,0;SU=22;PE=17;SR=5	GT:SU:PE:SR	./.:0:0:0	./.:22:17:5	./.:0:0:0	./.:0:0:0
unitig_0	1382131	1386739	-	-	DEL	-	4608	0	0	0	0	2		TM1119_g479;TM1119_g480	unitig_0	1382131	1386739	-		PM448_GAP		unitig_0	1382126	DEL00000110	G	<DEL>	.	PASS	PRECISE;SVTYPE=DEL;SVMETHOD=EMBL.DELLYv0.7.7;CHR2=unitig_0;END=1386735;PE=56;MAPQ=60;CT=3to5;CIPOS=-4,4;CIEND=-4,4;INSLEN=0;HOMLEN=4;SR=10;SRQ=0.983333;CONSENSUS=GGACCATCCCTCTGTGCCCCTCGTTTCCACGAGCTTGGGCCAGCTGCAGCTATCGCAGCACAGATAATGTTAATGTGAGGACCAGGGGGCAGCAAACAAGGAACCCCTGAGCGCCAGC;CE=1.96519	GT:GL:GQ:FT:RCL:RC:RCR:CN:DR:DV:RR:RV	1/1:-61.2975,-5.11503,0:51:PASS:558:0:497:0:0:55:0:17	1/1:-89.1964,-7.52219,0:75:PASS:655:207:743:0:0:31:0:25	1/1:-277.891,-23.1698,0:10000:PASS:869:2:1274:0:0:61:0:77	1/1:-274.19,-22.8685,0:10000:PASS:1138:1081:1121:1:0:87:0:76	unitig_0	1382126	46	N	<DEL>	.	.	SVTYPE=DEL;STRANDS=+-:376;SVLEN=-4611;END=1386737;CIPOS=0,0;CIEND=0,0;CIPOS95=0,0;CIEND95=0,0;SU=376;PE=238;SR=138	GT:SU:PE:SR	./.:65:56:9	./.:48:31:17	./.:127:63:64	./.:136:88:48
unitig_0	1399558	1399708	-	-	-	DEL	150	0	0	1	1	0	TM1119_g484		unitig_0	1399558	1399708	-	-	-	PM449_GAP	unitig_0	1399555	DEL00000115	CACCACAGTCGATGGCATTACTTTTCCAATATTCCCAGGGTGGCCGTGTGTTAGCGTGCCTACTACCACGCCCCCAGCCCCTACCGGAAGTACTACAGTATTGCCAGATGGTGTGACGTACACTTACCCCTGCGTGCTATCCCCAGTGACA	C	.	PASS	PRECISE;SVTYPE=DEL;SVMETHOD=EMBL.DELLYv0.7.7;CHR2=unitig_0;END=1399706;PE=0;MAPQ=60;CT=3to5;CIPOS=-9,9;CIEND=-9,9;INSLEN=0;HOMLEN=11;SR=10;SRQ=0.993711;CONSENSUS=CTACGCCTCCTGCTCCTACAGGGAGTGTTACAGTACTGCCTGACGGGGAAACATTTACCTATCCGTGTGTCCTGTCTCCAGTGACCACTATAGTAGATGGCTTTACATTCCCAATATTACCGGGATGGCCATGCTTCGGCGCTCCGACAACTACCCCTC;CE=1.97886	GT:GL:GQ:FT:RCL:RC:RCR:CN:DR:DV:RR:RV	1/1:-37.9707,-3.282,0:33:PASS:2320:281:1256:0:0:0:0:11	0/0:0,-8.12376,-94.596:81:PASS:1997:6912:2437:3:0:0:27:0	1/1:-122.795,-10.5307,0:105:PASS:3170:776:2300:0:0:0:0:35	1/1:-201.393,-16.5501,0:10000:PASS:4272:814:4107:0:0:0:0:55	unitig_0	1399557	51	N	<DEL>	.	.	SVTYPE=DEL;STRANDS=+-:39;SVLEN=-141;END=1399698;CIPOS=0,0;CIEND=0,0;CIPOS95=0,0;CIEND95=0,0;SU=39;PE=0;SR=39	GT:SU:PE:SR	./.:0:0:0	./.:0:0:0	./.:0:0:0	./.:39:0:39
unitig_0	1416368	1416785	-	-	DEL	-	417	0	0	0	0	0			unitig_0	1416368	1416785	-	-	PM448_GAP	-	unitig_0	1416365	DEL00000118	C	<DEL>	.	PASS	PRECISE;SVTYPE=DEL;SVMETHOD=EMBL.DELLYv0.7.7;CHR2=unitig_0;END=1416791;PE=70;MAPQ=60;CT=3to5;CIPOS=-4,4;CIEND=-4,4;INSLEN=0;HOMLEN=6;SR=10;SRQ=0.994118;CONSENSUS=GGTCTCTCGGTTCAATCACGTAGATATGTATGCTCAGTTCAATTATGAGGTCGTCAATCGCGATTGAATTTGACGCTCTTGAATACATATGGATACGAGTCAAGAACGTTGTTAAGCGGGACCTCTACAACGTAAAGCAATAAGGTATATTGAGCGATCGCTAATCATCA;CE=1.97506	GT:GL:GQ:FT:RCL:RC:RCR:CN:DR:DV:RR:RV	0/0:0,-5.71717,-69.7976:57:PASS:6342:8607:5683:1:42:0:19:0	0/0:0,-1.80521,-20.999:18:PASS:8540:15266:7281:2:47:0:6:0	1/1:-140.495,-11.7353,0:117:PASS:14136:84:11248:0:0:72:0:39	./.:0,0,0:0:LowQual:18827:32413:10803:2:78:0:0:0	unitig_0	1416367	53	N	<DEL>	.	.	SVTYPE=DEL;STRANDS=+-:93;SVLEN=-423;END=1416790;CIPOS=-2,0;CIEND=-2,0;CIPOS95=0,0;CIEND95=0,0;SU=93;PE=72;SR=21	GT:SU:PE:SR	./.:0:0:0	./.:0:0:0	./.:93:72:21	./.:0:0:0
unitig_0	1442786	1449549	-	DEL	-	-	6763	0	0	0	0	1		TM1119_g501	unitig_0	1442786	1449549	-	PM1118_GAP	-	-	unitig_0	1442793	DEL00000120	T	<DEL>	.	PASS	IMPRECISE;SVTYPE=DEL;SVMETHOD=EMBL.DELLYv0.7.7;CHR2=unitig_0;END=1449313;PE=49;MAPQ=60;CT=3to5;CIPOS=-50,50;CIEND=-50,50	GT:GL:GQ:FT:RCL:RC:RCR:CN:DR:DV:RR:RV	1/1:-280.8,-14.7502,0:148:PASS:767:0:776:0:0:49:0:0	1/1:-141.9,-7.22469,0:72:PASS:869:14:695:0:0:24:0:0	1/1:-200.2,-10.2347,0:102:PASS:1125:2:1134:0:0:34:0:0	0/0:0,-34.0163,-675.2:10000:PASS:1783:3739:1770:2:113:0:0:0	unitig_0	1442785	55	N	<DEL>	.	.	SVTYPE=DEL;STRANDS=+-:6;SVLEN=-6764;END=1449549;CIPOS=-6,5;CIEND=-6,5;CIPOS95=0,0;CIEND95=0,0;SU=6;PE=0;SR=6	GT:SU:PE:SR	./.:0:0:0	./.:6:0:6	./.:0:0:0	./.:0:0:0
unitig_0	1442794	1449308	DEL	-	DEL	-	6514	0	0	0	0	1		TM1119_g501	unitig_0	1442794	1449308	PA7_GAP	-	PM448_GAP	-	unitig_0	1442793	DEL00000120	T	<DEL>	.	PASS	IMPRECISE;SVTYPE=DEL;SVMETHOD=EMBL.DELLYv0.7.7;CHR2=unitig_0;END=1449313;PE=49;MAPQ=60;CT=3to5;CIPOS=-50,50;CIEND=-50,50	GT:GL:GQ:FT:RCL:RC:RCR:CN:DR:DV:RR:RV	1/1:-280.8,-14.7502,0:148:PASS:767:0:776:0:0:49:0:0	1/1:-141.9,-7.22469,0:72:PASS:869:14:695:0:0:24:0:0	1/1:-200.2,-10.2347,0:102:PASS:1125:2:1134:0:0:34:0:0	0/0:0,-34.0163,-675.2:10000:PASS:1783:3739:1770:2:113:0:0:0	unitig_0	1442793	54	N	<DEL>	.	.	SVTYPE=DEL;STRANDS=+-:90;SVLEN=-6518;END=1449311;CIPOS=-1,0;CIEND=0,0;CIPOS95=0,0;CIEND95=0,1;IMPRECISE;SU=90;PE=68;SR=22	GT:SU:PE:SR	./.:30:30:0	./.:1:1:0	./.:59:37:22	./.:0:0:0
unitig_0	1486266	1486520	-	DEL	-	-	254	0	0	1	1	0	TM1119_g509		unitig_0	1486266	1486520	-	PM1118_GAP	-	-	unitig_0	1486265	DEL00000125	TCCTGTGGACAGAGGAGGATAGACTTGACTACATCGCCTATGCGAAGCTGGAGAAGATGGCGGAGTTCCTGCAGATAGAGCGGCTGAGGGCCTGGCTGTCGAAGAGGAGATATCTCGAGGTGGTGGAATATGTCCACCGCGCCAGTCGTGAGACGCTTCCCAACCCAGGGGACCGCGGCGGTGCCAGCAAGACGCCGACGTCGTGGCGCCGCAGGTGTGCGGCGAATGTTACATGCAGTATTGTTTCTGAGCCGAA	T	.	PASS	PRECISE;SVTYPE=DEL;SVMETHOD=EMBL.DELLYv0.7.7;CHR2=unitig_0;END=1486521;PE=0;MAPQ=60;CT=3to5;CIPOS=-1,1;CIEND=-1,1;INSLEN=0;HOMLEN=0;SR=10;SRQ=0.994444;CONSENSUS=GTCTCCGGTGCCTTCGAGCTACTTCCATCTCGACCTCGACCCCGGCGTGTTCCGCCACGTGCTAGACTATCTACGAAGTGGCGTCATGCCGTTTGCTTCGGGATACAGGCGGGAGAAGGAGGTATTGGTTGTGACGAGGGAGCTGATTATCAATAACAAGGTCTTGTTTGACGAGGAATG;CE=1.98349	GT:GL:GQ:FT:RCL:RC:RCR:CN:DR:DV:RR:RV	0/0:0,-4.21196,-49.1975:42:PASS:2911:5996:2050:2:0:0:14:0	1/1:-86.3723,-7.09698,0:71:PASS:3980:309:1782:0:0:0:0:24	0/0:0,-25.2735,-299.087:10000:PASS:12726:27560:5324:3:0:0:84:0	0/0:0,-18.0524,-211.791:10000:PASS:9990:19555:7283:2:0:0:60:0	unitig_0	1486265	57	N	<DEL>	.	.	SVTYPE=DEL;STRANDS=+-:11;SVLEN=-255;END=1486520;CIPOS=-3,2;CIEND=-3,2;CIPOS95=0,0;CIEND95=0,0;SU=11;PE=0;SR=11	GT:SU:PE:SR	./.:0:0:0	./.:11:0:11	./.:0:0:0	./.:0:0:0
unitig_0	1662303	1663692	-	-	-	DEL	1389	0	0	0	0	0			unitig_0	1662303	1663692	-	-	-	PM449_GAP	unitig_0	1662301	DEL00000131	T	<DEL>	.	PASS	PRECISE;SVTYPE=DEL;SVMETHOD=EMBL.DELLYv0.7.7;CHR2=unitig_0;END=1663693;PE=103;MAPQ=60;CT=3to5;CIPOS=-3,3;CIEND=-3,3;INSLEN=0;HOMLEN=2;SR=10;SRQ=0.96129;CONSENSUS=TAAACAGCTGGCCACGTACCCAATAGTATTTGTCGATAAGATGCATCAGTTACAATCTGCTCCCTGAAAGCCAGCAACTGAATCACCATCCGCAACTCTGCGGACAAATGCAGCCAAGGCGCATGCTGAGCCTTGGCTTGAATAGGCATTGTGCT;CE=1.99102	GT:GL:GQ:FT:RCL:RC:RCR:CN:DR:DV:RR:RV	0/0:0,-1.80556,-22.2994:18:PASS:146:334:135:2:1:0:6:0	./.:0,0,0:0:LowQual:234:103:81:1:13:0:0:0	./.:0,0,0:0:LowQual:365:126:73:1:15:0:0:0	1/1:-199.693,-16.5496,0:10000:PASS:369:0:412:0:0:103:0:55	unitig_0	1662302	59	N	<DEL>	.	.	SVTYPE=DEL;STRANDS=+-:38;SVLEN=-1390;END=1663692;CIPOS=0,0;CIEND=0,0;CIPOS95=0,0;CIEND95=0,0;SU=38;PE=0;SR=38	GT:SU:PE:SR	./.:0:0:0	./.:0:0:0	./.:0:0:0	./.:38:0:38
unitig_0	1662620	1663444	-	DEL	DEL	-	824	0	0	0	0	0			unitig_0	1662620	1663444	-	PM1118_GAP	PM448_GAP	-	unitig_0	1662618	DEL00000132	A	<DEL>	.	PASS	PRECISE;SVTYPE=DEL;SVMETHOD=EMBL.DELLYv0.7.7;CHR2=unitig_0;END=1663445;PE=29;MAPQ=60;CT=3to5;CIPOS=-4,4;CIEND=-4,4;INSLEN=0;HOMLEN=3;SR=10;SRQ=0.974093;CONSENSUS=CCCCTCCAGCTGATGCATTCTTCTCGCTGCGATCGCTGCGGCTTGAAGCAAACGATCGTAATGCAACGGCCGGAGGAAATCAGAGGCCAGGGATAGATCACACTTAGAGCAGTCGTACTTCGGGAGCTCTAAGCGTAGCCAGATCCATTGCACGTATGCTTTTCGTTCACCTTGAACAATTCTGCCGAATTC;CE=1.99739	GT:GL:GQ:FT:RCL:RC:RCR:CN:DR:DV:RR:RV	0/0:0,-5.11378,-58.7963:51:PASS:93:217:40:3:27:0:17:0	1/1:-71.4974,-3.11995,0:31:PASS:74:2:62:0:1:29:1:21	1/1:-114.094,-9.92792,0:99:PASS:122:0:70:0:0:38:0:33	./.:0,0,0:0:LowQual:36:0:86:0:0:26:0:0	unitig_0	1662619	60	N	<DEL>	.	.	SVTYPE=DEL;STRANDS=+-:104;SVLEN=-825;END=1663444;CIPOS=-10,9;CIEND=-10,9;CIPOS95=0,0;CIEND95=0,0;SU=104;PE=72;SR=32	GT:SU:PE:SR	./.:0:0:0	./.:40:32:8	./.:63:39:24	./.:1:1:0
unitig_0	1663573	1663883	DEL	-	-	-	310	0	0	0	0	0			unitig_0	1663573	1663883	PA7_GAP	-	-	-	unitig_0	1663572	DEL00000133	T	<DEL>	.	PASS	PRECISE;SVTYPE=DEL;SVMETHOD=EMBL.DELLYv0.7.7;CHR2=unitig_0;END=1663884;PE=42;MAPQ=60;CT=3to5;CIPOS=-2,2;CIEND=-2,2;INSLEN=0;HOMLEN=2;SR=10;SRQ=0.977273;CONSENSUS=TCGTTCACCTTGAACAATTCTGCCGAATTCACAAATATCTGACTAATGCAGAGTCATCTATCTAAGACTGATTGCGATCGAATTTGTTCATGAAGAAAGTTTTTCTTTCTTTCGAATTCTATTATGTGCTGA;CE=1.92162	GT:GL:GQ:FT:RCL:RC:RCR:CN:DR:DV:RR:RV	1/1:-75.696,-6.31762,0:63:PASS:4016:10:4376:0:0:42:0:21	0/0:0,-4.51379,-55.3983:45:PASS:2819:6203:2674:2:5:0:15:0	0/0:0,-3.91145,-46.0981:39:PASS:2332:7415:1554:4:7:0:13:0	0/0:0,-12.6368,-151.694:126:PASS:0:14838:13915:2:0:0:42:0	unitig_0	1663572	61	N	<DEL>	.	.	SVTYPE=DEL;STRANDS=+-:9;SVLEN=-311;END=1663883;CIPOS=-4,3;CIEND=-4,3;CIPOS95=0,0;CIEND95=0,0;SU=9;PE=0;SR=9	GT:SU:PE:SR	./.:9:0:9	./.:0:0:0	./.:0:0:0	./.:0:0:0
unitig_0	1881231	1881821	-	-	DEL	-	590	0	0	0	0	0			unitig_0	1881231	1881821	-	-	PM448_GAP	-	unitig_0	1881227	DEL00000144	A	<DEL>	.	PASS	IMPRECISE;SVTYPE=DEL;SVMETHOD=EMBL.DELLYv0.7.7;CHR2=unitig_0;END=1881822;PE=10;MAPQ=60;CT=3to5;CIPOS=-50,50;CIEND=-50,50	GT:GL:GQ:FT:RCL:RC:RCR:CN:DR:DV:RR:RV	0/0:0,-15.0514,-288.5:151:PASS:61:119:65:2:50:0:0:0	0/0:0,-7.82612,-147.199:78:PASS:45:78:33:2:26:0:0:0	1/1:-44.9917,-3.002,0:30:PASS:43:0:21:0:0:10:0:0	0/0:0,-29.5009,-588:10000:PASS:178:303:162:2:98:0:0:0	unitig_0	1881226	63	N	<DEL>	.	.	SVTYPE=DEL;STRANDS=+-:21;SVLEN=-595;END=1881821;CIPOS=-3,2;CIEND=-10,9;CIPOS95=0,0;CIEND95=0,0;SU=21;PE=10;SR=11	GT:SU:PE:SR	./.:0:0:0	./.:0:0:0	./.:21:10:11	./.:0:0:0
unitig_0	2196640	2196986	-	-	-	DEL	346	0	0	0	0	0			unitig_0	2196640	2196986	-	-	-	PM449_GAP	unitig_0	2196639	DEL00000173	A	<DEL>	.	PASS	PRECISE;SVTYPE=DEL;SVMETHOD=EMBL.DELLYv0.7.7;CHR2=unitig_0;END=2196987;PE=99;MAPQ=60;CT=3to5;CIPOS=-1,1;CIEND=-1,1;INSLEN=0;HOMLEN=0;SR=10;SRQ=0.983784;CONSENSUS=CATTCCGCTCTACACACCTAGTCTCTTACATCTAATATGAAGTTCCTCCCATATCAGGCTTTCGACCGCCGTTATATCTTCGTTCGACCGTGAACTCAATTAGAGGCCAGACGGAGAAAGGTCCGTAAAGGAACCTTTAGTTGTTGGGAATGCAAGCGGCGGAAGATGAAATGTATCTTCGATT;CE=1.99363	GT:GL:GQ:FT:RCL:RC:RCR:CN:DR:DV:RR:RV	0/0:0,-3.00967,-38.6994:30:PASS:4324:5235:4676:1:32:0:10:0	0/0:0,-8.12417,-97.6964:81:PASS:3066:8583:5596:2:26:0:27:0	0/0:0,-9.02506,-105.694:90:PASS:4149:10537:6245:2:38:0:30:0	1/1:-221.991,-18.6552,0:10000:PASS:10593:154:11767:0:0:99:0:62	unitig_0	2196639	66	N	<DEL>	.	.	SVTYPE=DEL;STRANDS=+-:22;SVLEN=-347;END=2196986;CIPOS=-2,0;CIEND=-10,9;CIPOS95=0,0;CIEND95=0,0;SU=22;PE=2;SR=20	GT:SU:PE:SR	./.:0:0:0	./.:0:0:0	./.:0:0:0	./.:22:2:20
unitig_0	2295481	2295630	-	-	DEL	-	149	0	0	0	0	0			unitig_0	2295481	2295630	-	-	PM448_GAP	-	unitig_0	2295480	DEL00000177	ACTGACTGACTGACAGACTGACTGACAGACTGACAGACTGACTGACTGACAGACTGACTGACAGACTGACAGACTGACTGACTGACTGACTGACAGACTGACAGACTGACTGACTGACTGACTGACAGACTGACAGACTGACTGACTGAC	A	.	PASS	PRECISE;SVTYPE=DEL;SVMETHOD=EMBL.DELLYv0.7.7;CHR2=unitig_0;END=2295630;PE=0;MAPQ=60;CT=3to5;CIPOS=-13,13;CIEND=-13,13;INSLEN=0;HOMLEN=17;SR=10;SRQ=0.969697;CONSENSUS=TGCAGCGTCTCCCGCAAGATCGAGAGCCTACCACGCCTTCACCATCTCCAAGACATCAGGCTTCGAGCATCATGCAGACTGAATGACTGACTGACTGAATGATTTACTGGTCACGCCACGCCAGACCACGGTGGACTGCAGACCGCAGACCAACAGCAACAAC;CE=1.95396	GT:GL:GQ:FT:RCL:RC:RCR:CN:DR:DV:RR:RV	./.:0,0,0:0:LowQual:1744:251:1499:0:0:0:0:0	./.:0,0,0:0:LowQual:4622:891:2782:0:0:0:0:0	1/1:-241.89,-20.46,0:10000:PASS:6081:883:3923:0:0:0:0:68	0/0:0,-6.31897,-76.5973:63:PASS:4750:4952:4847:1:0:0:21:0	unitig_0	2295493	67	N	<DEL>	.	.	SVTYPE=DEL;STRANDS=+-:95;SVLEN=-137;END=2295630;CIPOS=-3,9;CIEND=0,0;CIPOS95=0,0;CIEND95=0,0;SU=95;PE=0;SR=95	GT:SU:PE:SR	./.:1:0:1	./.:34:0:34	./.:60:0:60	./.:0:0:0
unitig_0	2589597	2590347	DEL	-	-	-	750	0	0	0	0	0			unitig_0	2589597	2590347	PA7_GAP	-	-	-	unitig_0	2589591	DEL00000197	A	<DEL>	.	PASS	PRECISE;SVTYPE=DEL;SVMETHOD=EMBL.DELLYv0.7.7;CHR2=unitig_0;END=2590348;PE=39;MAPQ=60;CT=3to5;CIPOS=-7,7;CIEND=-7,7;INSLEN=0;HOMLEN=6;SR=10;SRQ=0.955882;CONSENSUS=TATCCGGCTTCATGATGACTTATAGTTGGTGATAGAGATGAGCTTGGTTCCATGTGCAGATACTCAAAATCTGCTCTGGAGCCTTGTATTGTTCTGTCCCGCTGACTGTGGTCCATTGACTATCAAGGAATTGCT;CE=1.9671	GT:GL:GQ:FT:RCL:RC:RCR:CN:DR:DV:RR:RV	1/1:-48.1986,-3.91198,0:39:PASS:65:0:69:0:0:39:0:13	0/0:0,-5.11527,-60.9978:51:PASS:36:171:66:3:28:0:17:0	0/0:0,-5.41662,-66.2981:54:PASS:62:218:98:3:55:0:18:0	0/0:0,-23.471,-282.391:10000:PASS:222:450:201:2:110:0:78:0	unitig_0	2589596	71	N	<DEL>	.	.	SVTYPE=DEL;STRANDS=+-:46;SVLEN=-751;END=2590347;CIPOS=-4,4;CIEND=-10,9;CIPOS95=0,0;CIEND95=0,0;SU=46;PE=40;SR=6	GT:SU:PE:SR	./.:46:40:6	./.:0:0:0	./.:0:0:0	./.:0:0:0
unitig_0	2750720	2756569	-	DEL	DEL	DEL	5849	1	0	0	1	0	TM1119_g887		unitig_0	2750720	2756569	-	PM1118_GAP	PM448_GAP	PM449_GAP	unitig_0	2750720	DEL00000210	T	<DEL>	.	PASS	IMPRECISE;SVTYPE=DEL;SVMETHOD=EMBL.DELLYv0.7.7;CHR2=unitig_0;END=2756569;PE=70;MAPQ=60;CT=3to5;CIPOS=-140,140;CIEND=-140,140	GT:GL:GQ:FT:RCL:RC:RCR:CN:DR:DV:RR:RV	./.:0,0,0:0:LowQual:450:0:11:0:0:0:0:0	1/1:-172.2,-9.63254,0:96:PASS:461:8:454:0:0:32:0:0	1/1:-275.099,-9.35188,0:94:PASS:678:4:648:0:1:50:0:0	1/1:-401.999,-21.0713,0:10000:PASS:1565:0:1702:0:0:70:0:0	unitig_0	2750718	74	N	<DEL>	.	.	SVTYPE=DEL;STRANDS=+-:156;SVLEN=-5850;END=2756568;CIPOS=-1,187;CIEND=-352,9;CIPOS95=0,50;CIEND95=-59,0;IMPRECISE;SU=156;PE=156;SR=0	GT:SU:PE:SR	./.:0:0:0	./.:33:33:0	./.:51:51:0	./.:72:72:0
unitig_0	2777370	2777459	DEL	-	-	DEL	89	0	0	0	0	0			unitig_0	2777370	2777459	PA7_GAP	-	PM448_GAP	PM449_GAP	unitig_0	2777369	DEL00000212	TACGTCGAATGGCCGACGTCTATAAGAACGCGTACGTCACCATATTTGCTACAGAAGGCCACGACTCGACATATAGACTCTCAGGTGTGTC	T	.	PASS	PRECISE;SVTYPE=DEL;SVMETHOD=EMBL.DELLYv0.7.7;CHR2=unitig_0;END=2777460;PE=0;MAPQ=60;CT=3to5;CIPOS=-2,2;CIEND=-2,2;INSLEN=0;HOMLEN=1;SR=10;SRQ=0.991525;CONSENSUS=CTGGGTGGACAAATATTGCATTGATCAGAAAGATACTGCGGTAAAAAAAGAACAACTTTCGAGGCATCGACGTCCTCGACAGATCATAGACATTGGACAGCAACTATTCACACTAGTC;CE=1.95992	GT:GL:GQ:FT:RCL:RC:RCR:CN:DR:DV:RR:RV	1/1:-67.197,-5.71661,0:57:PASS:774:12:620:0:0:0:0:19	0/0:0,-4.51374,-55.3983:45:PASS:808:1866:837:2:0:0:15:0	1/1:-17.2991,-1.50423,0:15:PASS:601:2:148:0:0:0:0:5	1/1:-302.09,-24.9756,0:10000:PASS:2719:55:3200:0:0:0:0:83	unitig_0	2777369	75	N	<DEL>	.	.	SVTYPE=DEL;STRANDS=+-:58;SVLEN=-90;END=2777459;CIPOS=0,0;CIEND=0,0;CIPOS95=0,0;CIEND95=0,0;SU=58;PE=1;SR=57	GT:SU:PE:SR	./.:11:0:11	./.:0:0:0	./.:1:0:1	./.:45:0:45
unitig_0	2806275	2808306	-	-	-	DEL	2031	1	0	0	1	0	TM1119_g906		unitig_0	2806275	2808306	-	-	-	PM449_GAP	unitig_0	2806274	DEL00000214	A	<DEL>	.	PASS	PRECISE;SVTYPE=DEL;SVMETHOD=EMBL.DELLYv0.7.7;CHR2=unitig_0;END=2808304;PE=85;MAPQ=60;CT=3to5;CIPOS=-2,2;CIEND=-2,2;INSLEN=0;HOMLEN=1;SR=10;SRQ=0.950617;CONSENSUS=AGGGATTGACTCCCTCATACGTTTGATAACTGATACATGATGATATAAATACACCGACTTGTCCCGGACATTGAGACGTCTTTGCTGGTGCGGAGCGATCTGCATCGCCGGCAGATTTGATTATTCAGACGCCTTTTGCGACAAGAAGAGGCGAACGCGT;CE=1.99747	GT:GL:GQ:FT:RCL:RC:RCR:CN:DR:DV:RR:RV	./.:0,0,0:0:LowQual:205:20:23:0:0:0:0:0	0/0:0,-5.11564,-62.3981:51:PASS:147:338:150:2:22:0:17:0	0/0:0,-8.72631,-105.596:87:PASS:117:400:164:3:15:0:29:0	1/1:-244.892,-20.4617,0:10000:PASS:549:0:499:0:0:85:0:68	unitig_0	2806274	76	N	<DEL>	.	.	SVTYPE=DEL;STRANDS=+-:129;SVLEN=-2032;END=2808306;CIPOS=0,0;CIEND=0,0;CIPOS95=0,0;CIEND95=0,0;SU=129;PE=88;SR=41	GT:SU:PE:SR	./.:0:0:0	./.:0:0:0	./.:0:0:0	./.:129:88:41
unitig_0	2806363	2809184	DEL	-	-	-	2821	0	0	0	0	1		TM1119_g906	unitig_0	2806363	2809184	PA7_GAP	-	-	-	unitig_0	2806361	DEL00000215	A	<DEL>	.	PASS	PRECISE;SVTYPE=DEL;SVMETHOD=EMBL.DELLYv0.7.7;CHR2=unitig_0;END=2809185;PE=35;MAPQ=60;CT=3to5;CIPOS=-4,4;CIEND=-4,4;INSLEN=0;HOMLEN=3;SR=10;SRQ=0.974138;CONSENSUS=CTAGTCCATACGACTTGGAATCCAGCGATTCGTTTCATATCAAACACATTCAAGTGTACTGGGAAGCTGCCAGCTATGAGATATGTTGAGCGGATCTTGGTCAGTAGTGAACACTG;CE=1.99035	GT:GL:GQ:FT:RCL:RC:RCR:CN:DR:DV:RR:RV	1/1:-44.3977,-3.61009,0:36:PASS:291:0:267:0:0:35:0:12	0/0:0,-3.61052,-42.6982:36:PASS:275:467:270:2:12:0:12:0	0/0:0,-2.10656,-25.9994:21:PASS:266:552:434:2:9:0:7:0	./.:0,0,0:0:LowQual:728:442:630:1:0:0:0:0	unitig_0	2806362	77	N	<DEL>	.	.	SVTYPE=DEL;STRANDS=+-:36;SVLEN=-2822;END=2809184;CIPOS=-10,9;CIEND=-10,9;CIPOS95=-1,2;CIEND95=-3,1;IMPRECISE;SU=36;PE=35;SR=1	GT:SU:PE:SR	./.:36:35:1	./.:0:0:0	./.:0:0:0	./.:0:0:0
unitig_0	3204424	3209642	DEL	-	-	DEL	5218	0	0	0	0	1		TM1119_g1043	unitig_0	3204424	3209642	PA7_GAP	-	-	PM449_GAP	unitig_0	3204406	DEL00000241	G	<DEL>	.	PASS	IMPRECISE;SVTYPE=DEL;SVMETHOD=EMBL.DELLYv0.7.7;CHR2=unitig_0;END=3209643;PE=47;MAPQ=60;CT=3to5;CIPOS=-96,96;CIEND=-96,96	GT:GL:GQ:FT:RCL:RC:RCR:CN:DR:DV:RR:RV	1/1:-117.7,-6.6224,0:66:PASS:453:0:475:0:0:22:0:0	0/0:0,-9.93398,-197.8:99:PASS:588:845:586:1:33:0:0:0	0/0:0,-17.4575,-344.298:10000:PASS:818:978:868:1:58:0:0:0	1/1:-274.797,-14.1456,0:141:PASS:1207:0:1409:0:0:47:0:0	unitig_0	3204423	85	N	<DEL>	.	.	SVTYPE=DEL;STRANDS=+-:76;SVLEN=-5219;END=3209642;CIPOS=-10,9;CIEND=-5,0;CIPOS95=0,0;CIEND95=0,0;SU=76;PE=70;SR=6	GT:SU:PE:SR	./.:22:22:0	./.:0:0:0	./.:0:0:0	./.:54:48:6
unitig_0	3357902	3358096	-	DEL	-	-	194	0	0	0	0	0			unitig_0	3357902	3358096	-	PM1118_GAP			unitig_0	3357898	DEL00000256	GGTACACCTCCGCCGGGGTAATATTTGTTAATTCTGAGTGGGAATCGCGACTTTTCAGACTAGGGAGTTGCTACTTTTGTAAAGACCAGCGGGGCTATAGAAATAAACAGAATCTTCGAAGCCTCAATCAGGTATTCTTAACCCTGGTTTTCTGGTATTTTCAACTCGCTAAAATAACGTTTATTACCCTGGCGGAGGT	G	.	PASS	PRECISE;SVTYPE=DEL;SVMETHOD=EMBL.DELLYv0.7.7;CHR2=unitig_0;END=3358097;PE=0;MAPQ=60;CT=3to5;CIPOS=-5,5;CIEND=-5,5;INSLEN=0;HOMLEN=5;SR=10;SRQ=1;CONSENSUS=CTACGAATCATTAACGTCTTTCAGGCTAAATAAGGGGCCAAGTAACAGCAATATTATGTAGAGTATAGCATAGAATTGCATGGTAGATATGAAGTCCACCTCAGGGCGACAGGATAGTCAGTGCCACCAAAGAGTCACCCTTTCCTGTGGTCCAAGTCTCC;CE=1.98584	GT:GL:GQ:FT:RCL:RC:RCR:CN:DR:DV:RR:RV	0/0:0,-5.71459,-65.995:57:PASS:2038:3969:1704:2:0:0:19:0	1/1:-61.2978,-5.11529,0:51:PASS:1412:34:3394:0:0:0:0:17	1/1:-145.896,-12.0368,0:120:PASS:2918:4094:5681:1:0:0:0:40	1/1:-198.593,-16.2485,0:10000:PASS:7761:1524:4892:0:0:0:0:54	unitig_0	3357901	87	N	<DEL>	.	.	SVTYPE=DEL;STRANDS=+-:83;SVLEN=-195;END=3358096;CIPOS=0,0;CIEND=0,0;CIPOS95=0,0;CIEND95=0,0;SU=83;PE=0;SR=83	GT:SU:PE:SR	./.:0:0:0	./.:10:0:10	./.:28:0:28	./.:44:0:44
unitig_0	3464603	3465901	DEL	-	DEL	DEL	1298	0	0	0	0	0			unitig_0	3464603	3465901	PA7_GAP	-	PM448_GAP	PM449_GAP	unitig_0	3464596	DEL00000271	G	<DEL>	.	PASS	PRECISE;SVTYPE=DEL;SVMETHOD=EMBL.DELLYv0.7.7;CHR2=unitig_0;END=3465902;PE=31;MAPQ=60;CT=3to5;CIPOS=-7,7;CIEND=-7,7;INSLEN=0;HOMLEN=8;SR=10;SRQ=0.991667;CONSENSUS=GTCGGACATCCTGATAATCAATCAATCTGGGGGGCATGTGGTGGAGGAGGTGCAGCAGTCCGCAACCCCAGATAGACATGGATTTGTGAAATGTCGACCATAGCAGCACGCGAGCAAAAT;CE=1.97443	GT:GL:GQ:FT:RCL:RC:RCR:CN:DR:DV:RR:RV	1/1:-29.5977,-2.70697,0:27:PASS:106:0:121:0:0:31:0:9	1/1:-114.294,-9.928,0:99:PASS:153:112:170:1:0:37:0:33	1/1:-211.29,-18.3532,0:10000:PASS:192:2:270:0:0:65:0:61	1/1:-194.591,-16.8486,0:10000:PASS:347:0:318:0:0:77:0:56	unitig_0	3464602	89	N	<DEL>	.	.	SVTYPE=DEL;STRANDS=+-:343;SVLEN=-1299;END=3465901;CIPOS=0,0;CIEND=0,0;CIPOS95=0,0;CIEND95=0,0;SU=343;PE=217;SR=126	GT:SU:PE:SR	./.:37:31:6	./.:59:37:22	./.:121:70:51	./.:123:77:46
unitig_0	3464603	3465906	-	DEL	-	-	1303	0	0	0	0	0			unitig_0	3464603	3465906	-	PM1118_GAP	-	-	unitig_0	3464596	DEL00000271	G	<DEL>	.	PASS	PRECISE;SVTYPE=DEL;SVMETHOD=EMBL.DELLYv0.7.7;CHR2=unitig_0;END=3465902;PE=31;MAPQ=60;CT=3to5;CIPOS=-7,7;CIEND=-7,7;INSLEN=0;HOMLEN=8;SR=10;SRQ=0.991667;CONSENSUS=GTCGGACATCCTGATAATCAATCAATCTGGGGGGCATGTGGTGGAGGAGGTGCAGCAGTCCGCAACCCCAGATAGACATGGATTTGTGAAATGTCGACCATAGCAGCACGCGAGCAAAAT;CE=1.97443	GT:GL:GQ:FT:RCL:RC:RCR:CN:DR:DV:RR:RV	1/1:-29.5977,-2.70697,0:27:PASS:106:0:121:0:0:31:0:9	1/1:-114.294,-9.928,0:99:PASS:153:112:170:1:0:37:0:33	1/1:-211.29,-18.3532,0:10000:PASS:192:2:270:0:0:65:0:61	1/1:-194.591,-16.8486,0:10000:PASS:347:0:318:0:0:77:0:56	unitig_0	3464602	89	N	<DEL>	.	.	SVTYPE=DEL;STRANDS=+-:343;SVLEN=-1299;END=3465901;CIPOS=0,0;CIEND=0,0;CIPOS95=0,0;CIEND95=0,0;SU=343;PE=217;SR=126	GT:SU:PE:SR	./.:37:31:6	./.:59:37:22	./.:121:70:51	./.:123:77:46
unitig_0	3505023	3505218	DEL	-	DEL	DEL	195	0	0	1	1	0	TM1119_g1147 exon		unitig_0	3505023	3505218	PA7_GAP	-	PM448_GAP	PM449_GAP	unitig_0	3505020	DEL00000274	AATGGACTAAATGGGCTGTGACTCTGTTGACCTCTCTTGGAGGTATGGTGACCTTGATGTCATCCACAATGATAGCTCCAGCCCTACCCGCCATATCTCAAGACCGTGACATGGATGATGCCACGACAGAGTTGACGCCTTCTGTCTTTGTCCTCAGCTATGCCTTTGGCCCTATGGTCATAGCTCCCACGACTGAAGT	A	.	PASS	PRECISE;SVTYPE=DEL;SVMETHOD=EMBL.DELLYv0.7.7;CHR2=unitig_0;END=3505219;PE=0;MAPQ=60;CT=3to5;CIPOS=-3,3;CIEND=-3,3;INSLEN=0;HOMLEN=2;SR=10;SRQ=1;CONSENSUS=TGTGGCCAGGTCACTTGGGATGGGCCAGATGGCCCTACAAATCCCTACAACTGGTCGCAATTTGGTAGAAAGCGTATATGGATTCTGTCTGGGTGCTTCTATGTCTTGTGGTCAGCAATGTTTGGAGACACATCTATTG;CE=1.97922	GT:GL:GQ:FT:RCL:RC:RCR:CN:DR:DV:RR:RV	1/1:-57.5976,-4.81405,0:48:PASS:2224:41:1501:0:0:0:0:16	0/0:0,-5.41596,-63.7974:54:PASS:1803:3817:1530:2:0:0:18:0	1/1:-80.9976,-6.62022,0:66:PASS:2632:47:1833:0:0:0:0:22	1/1:-261.991,-21.6655,0:10000:PASS:6593:131:8304:0:0:0:0:72	unitig_0	3505022	90	N	<DEL>	.	.	SVTYPE=DEL;STRANDS=+-:72;SVLEN=-196;END=3505218;CIPOS=0,0;CIEND=0,0;CIPOS95=0,0;CIEND95=0,0;SU=72;PE=1;SR=71	GT:SU:PE:SR	./.:5:0:5	./.:0:0:0	./.:18:1:17	./.:49:0:49
unitig_0	3685834	3686240	-	DEL	-	-	406	0	0	0	0	0			unitig_0	3685834	3686240	-	PM1118_GAP	-	-	unitig_0	3685827	DEL00000283	T	<DEL>	.	PASS	PRECISE;SVTYPE=DEL;SVMETHOD=EMBL.DELLYv0.7.7;CHR2=unitig_0;END=3686241;PE=40;MAPQ=60;CT=3to5;CIPOS=-8,8;CIEND=-8,8;INSLEN=0;HOMLEN=8;SR=10;SRQ=1;CONSENSUS=GCAAGTGCGGCTTAGCTGGGGTGGGGAGGGCCGGGCCGGGCCGTGCCAAGGAGCGGTAATCCCAGGTATGGGGGTGCGGGGCATCGTACGGGGAAGGACCAGAGCGCTTTGGATCTTATCATCCCATCACCAAACACCTTTTCGGTGTTTTATCTATTTACAC;CE=1.96037	GT:GL:GQ:FT:RCL:RC:RCR:CN:DR:DV:RR:RV	0/0:0,-3.3095,-39.3982:33:PASS:2748:5195:4116:2:23:0:11:0	1/1:-163.893,-11.142,0:111:PASS:7074:319:5934:0:0:40:1:47	0/0:0,-14.4419,-168.592:144:PASS:14664:24696:10212:2:63:0:48:0	0/0:0,-17.4509,-204.591:10000:PASS:13168:31104:16697:2:95:0:58:0	unitig_0	3685833	99	N	<DEL>	.	.	SVTYPE=DEL;STRANDS=+-:41;SVLEN=-407;END=3686240;CIPOS=0,0;CIEND=0,0;CIPOS95=0,0;CIEND95=0,0;SU=41;PE=0;SR=41	GT:SU:PE:SR	./.:0:0:0	./.:41:0:41	./.:0:0:0	./.:0:0:0
unitig_0	3875792	3875910	DEL	-	DEL	DEL	118	0	1	0	1	0	TM1119_g1229		unitig_0	3875792	3875910	PA7_GAP	-	PM448_GAP	PM449_GAP	unitig_0	3875786	DEL00000309	TTGGGAGCGCCACCGCAGAGGGCCGACCCAGCCTCGAAAACCAGAACGGAAACCAAGAAGGTCCCCTTCATATTGAACCTGTTGTAGAGGTTACCAAAGAAGGAAATGACGCACACGGACCCCAA	T	.	PASS	PRECISE;SVTYPE=DEL;SVMETHOD=EMBL.DELLYv0.7.7;CHR2=unitig_0;END=3875911;PE=0;MAPQ=60;CT=3to5;CIPOS=-8,8;CIEND=-8,8;INSLEN=0;HOMLEN=7;SR=10;SRQ=0.991304;CONSENSUS=CAAGGTTGATGCCGCTGCCTCCAGCGCCAGCAATGGCACGGCCGACTATTAGAGCGCTCATGTTGGGAAGCCTGCTTCGACCCAGGCCAGTGGTTCCACATGTCCAAACACCTGG;CE=1.96813	GT:GL:GQ:FT:RCL:RC:RCR:CN:DR:DV:RR:RV	1/1:-40.3967,-3.60903,0:36:PASS:616:44:816:0:0:0:0:12	0/0:0,-8.03436,-132.593:80:PASS:4068:6242:2492:2:0:0:39:1	1/1:-163.895,-13.5413,0:135:PASS:3754:220:1418:0:0:0:0:45	1/1:-220.392,-18.6554,0:10000:PASS:3244:241:3544:0:0:0:0:62	unitig_0	3875791	118	N	<DEL>	.	.	SVTYPE=DEL;STRANDS=+-:98;SVLEN=-119;END=3875910;CIPOS=0,0;CIEND=0,0;CIPOS95=0,0;CIEND95=0,0;SU=98;PE=0;SR=98	GT:SU:PE:SR	./.:9:0:9	./.:0:0:0	./.:39:0:39	./.:50:0:50
unitig_0	3942085	3942277	-	DEL	-	-	192	0	0	0	0	0			unitig_0	3942085	3942277	-	PM1118_GAP	-	-	unitig_0	3942084	DEL00000318	TAAACCGTTAACTGCAGTCAGCTTTGTTGGCCAACCTAACTACCGTAGATCTCTAGATTGTAGGACAAGTGCAAAATAGTTTGATCCGTTTTGTCCTCGCAGCGACAAGCCGTAAATTGCAGCAGGGTGTCTGCAATCAGCCACAACGCTGGACAAGAGATTTAAGAGAAGATGCGAATCAGGGAGGTCGCGTA	T	.	PASS	PRECISE;SVTYPE=DEL;SVMETHOD=EMBL.DELLYv0.7.7;CHR2=unitig_0;END=3942278;PE=0;MAPQ=60;CT=3to5;CIPOS=-2,2;CIEND=-2,2;INSLEN=0;HOMLEN=1;SR=7;SRQ=0.989247;CONSENSUS=GACGGGCGAACACGAATCTTGCATTAAATGAACTCCTCTTCTTAGACGAGACGCGATAATCTTGCATCATTGTTCTTGACAAGTCTAATTAACATGTGCCCTACTGATCGGTGAAATCCCTTGATTCAACACCGTTTCGTTATAAGAATGCCCATGCCGTGCCAGGAGTAGCCTGAGCTTGAATCT;CE=1.98901	GT:GL:GQ:FT:RCL:RC:RCR:CN:DR:DV:RR:RV	0/0:0,-3.91134,-46.498:39:PASS:998:3027:1475:2:0:0:13:0	1/1:-20.899,-1.80521,0:18:PASS:705:103:873:0:0:0:0:6	0/0:0,-3.6098,-40.7974:36:PASS:2147:2235:2190:1:0:0:12:0	0/0:0,-21.0622,-251.29:10000:PASS:8395:17023:8769:2:0:0:70:0	unitig_0	3942084	119	N	<DEL>	.	.	SVTYPE=DEL;STRANDS=+-:5;SVLEN=-193;END=3942277;CIPOS=-10,9;CIEND=-10,9;CIPOS95=0,0;CIEND95=0,0;SU=5;PE=0;SR=5	GT:SU:PE:SR	./.:0:0:0	./.:5:0:5	./.:0:0:0	./.:0:0:0
unitig_0	4249456	4249902	-	DEL	DEL	DEL	446	0	0	0	0	0			unitig_0	4249456	4249902	-	PM1118_GAP	PM448_GAP	PM449_GAP	unitig_0	4249454	DEL00000339	A	<DEL>	.	PASS	PRECISE;SVTYPE=DEL;SVMETHOD=EMBL.DELLYv0.7.7;CHR2=unitig_0;END=4249903;PE=47;MAPQ=60;CT=3to5;CIPOS=-2,2;CIEND=-2,2;INSLEN=0;HOMLEN=1;SR=10;SRQ=0.99435;CONSENSUS=TGAATAAGATCAAGGCGCATGCTGACTGTCAACCAGGTTAAAATCAGCTACTCATGGTTTGACAACGGGTGTCACGGCCCTCCATTATCGGGATCACGACGATGATCGCAACGACGTGGCATCCTTTGCTGGAAGGGGAAACAATCGTGAGGCATCCTTAAGTTGGTCAGCGCTATC;CE=1.99716	GT:GL:GQ:FT:RCL:RC:RCR:CN:DR:DV:RR:RV	0/0:0,-2.10639,-25.5992:21:PASS:3196:6714:3060:2:31:0:7:0	1/1:-174.095,-8.44737,0:84:PASS:15953:591:7579:0:1:47:2:49	1/1:-156.294,-12.9385,0:129:PASS:17528:46:10652:0:0:60:0:43	1/1:-203.892,-17.151,0:10000:PASS:14594:73:13317:0:0:62:0:57	unitig_0	4249455	139	N	<DEL>	.	.	SVTYPE=DEL;STRANDS=+-:257;SVLEN=-447;END=4249902;CIPOS=0,0;CIEND=0,0;CIPOS95=0,0;CIEND95=0,0;SU=257;PE=147;SR=110	GT:SU:PE:SR	./.:0:0:0	./.:73:35:38	./.:93:63:30	./.:90:48:42
unitig_0	4296254	4297592	-	-	-	DEL	1338	1	0	0	1	0	TM1119_g1373		unitig_0	4296254	4297592	-	-	-	PM449_GAP	unitig_0	4296252	DEL00000340	A	<DEL>	.	PASS	PRECISE;SVTYPE=DEL;SVMETHOD=EMBL.DELLYv0.7.7;CHR2=unitig_0;END=4297593;PE=83;MAPQ=60;CT=3to5;CIPOS=-3,3;CIEND=-3,3;INSLEN=0;HOMLEN=2;SR=10;SRQ=0.981013;CONSENSUS=CACTAATGACGAGCAACTTCTGTCTCTCGTCATTTCTCTGTATGATGTCCGAACTTTATGAAATGTTCCTTGAAGGAGAATGCAGGCGGCCGCGATGAGTGGGAGGAGCGCCCCAATCAGGTGGGTGTACACATTACAAGTCTCGCTGTGCAAGAACG;CE=1.99711	GT:GL:GQ:FT:RCL:RC:RCR:CN:DR:DV:RR:RV	0/0:0,-3.30939,-39.1981:33:PASS:98:205:110:2:40:0:11:0	0/0:0,-9.02585,-104.595:90:PASS:101:320:122:3:27:0:30:0	0/0:0,-8.12231,-93.6945:81:PASS:60:418:144:4:10:0:27:0	1/1:-256.891,-21.3643,0:10000:PASS:389:0:372:0:0:83:0:71	unitig_0	4296253	141	N	<DEL>	.	.	SVTYPE=DEL;STRANDS=+-:75;SVLEN=-1339;END=4297592;CIPOS=0,0;CIEND=0,0;CIPOS95=0,0;CIEND95=0,0;SU=75;PE=38;SR=37	GT:SU:PE:SR	./.:0:0:0	./.:0:0:0	./.:0:0:0	./.:75:38:37
unitig_0	4297854	4298140	-	-	DEL	-	286	0	0	0	0	0			unitig_0	4297854	4298140	-	-	PM448_GAP	-	unitig_0	4297845	DEL00000341	AATCAATTTTTCCAGGAAGGGGCATGCCGAAGGCACTCAGCAGGTATGCCTTGACCAATCGAATGGTCATCGTCACATCAACCCCAGCGTCGTGGGCATCCAAGGTCAGCCTCCAACCCTTGGGGAAGAAGGCCCCGTAGAGATTTTCCGAGTCGTAAGGAAAGCAGTCTTGCGTTGAGTTTCATATGACGCCGCACAGTATAGTATCATCCCAGTGGTTGATTGCTAAATTTCCAGTTGGGAATGAGCAAATCTTCTGCACCCGTAGTCTTGAGGATGTAACTCAAGCATCTGAT	A	.	PASS	PRECISE;SVTYPE=DEL;SVMETHOD=EMBL.DELLYv0.7.7;CHR2=unitig_0;END=4298141;PE=0;MAPQ=60;CT=3to5;CIPOS=-8,8;CIEND=-8,8;INSLEN=0;HOMLEN=7;SR=10;SRQ=0.969697;CONSENSUS=GCCATGTCACGGTTCGGGCTTTGGCCATTTGCCGAGTTGTGGGCGCCTCTGTGGTGTTTGATCGGCTGAGGAGAAATGGCAATCGATTTGAGTGACTGCCCAAGTAATACAGGCTTTCACGGGCCCATGTTCCTAGGTGAAAGAAGGCAATTTAGCCGACTTGAA;CE=1.98112	GT:GL:GQ:FT:RCL:RC:RCR:CN:DR:DV:RR:RV	0/0:0,-3.00868,-34.9984:30:PASS:2045:4549:2862:2:0:0:10:0	0/0:0,-5.71758,-70.098:57:PASS:5987:6522:2379:2:0:0:19:0	1/1:-161.694,-13.5401,0:135:PASS:8874:121:4083:0:0:0:0:45	0/0:0,-20.4602,-245.19:10000:PASS:11190:22853:12816:2:0:0:68:0	unitig_0	4297848	142	N	<DEL>	.	.	SVTYPE=DEL;STRANDS=+-:44;SVLEN=-292;END=4298140;CIPOS=0,0;CIEND=0,0;CIPOS95=0,0;CIEND95=0,0;SU=44;PE=7;SR=37	GT:SU:PE:SR	./.:0:0:0	./.:0:0:0	./.:44:7:37	./.:0:0:0
unitig_0	4328699	4328808	-	DEL	-	-	109	0	0	0	0	0			unitig_0	4328699	4328808	-	PM1118_GAP	-	-	unitig_0	4328695	DEL00000343	AATTCCGCACCTTTCTTACCGAAGCAAACAGAATCTCCTCAGACCGTTTCATTCCAAAGACATCGTCGGGAAGTTCGTTCAAACCGCTCCTGGCTCTGAGGTAATAATACAT	A	.	PASS	PRECISE;SVTYPE=DEL;SVMETHOD=EMBL.DELLYv0.7.7;CHR2=unitig_0;END=4328807;PE=0;MAPQ=60;CT=3to5;CIPOS=-4,4;CIEND=-4,4;INSLEN=0;HOMLEN=4;SR=10;SRQ=0.976048;CONSENSUS=TCACCAAATGCTGCTCGTTTGTCCGTCGTGCCAGGGAGAAAGGAGGGAGGCCGTTTGTCATCTTGAAATTGGATTATATTGCCCTGAGTCCGCGTTTCAGGCTTCCCTGAACATCCAAGATCCCATCTCCACCCCGTGCCGTCTGTGCTTCTCTCGCCTCGCAAT;CE=1.97472	GT:GL:GQ:FT:RCL:RC:RCR:CN:DR:DV:RR:RV	0/0:0,-1.50448,-17.9993:15:PASS:905:1317:823:2:0:0:5:0	1/1:-117.496,-9.92951,0:99:PASS:1780:65:2339:0:0:0:0:33	0/0:0,-7.22084,-84.9961:72:PASS:3534:6809:3660:2:0:0:24:0	0/0:0,-14.4425,-172.693:144:PASS:3240:7174:4051:2:0:0:48:0	unitig_0	4328698	143	N	<DEL>	.	.	SVTYPE=DEL;STRANDS=+-:27;SVLEN=-108;END=4328806;CIPOS=-1,0;CIEND=-1,0;CIPOS95=0,0;CIEND95=0,0;SU=27;PE=0;SR=27	GT:SU:PE:SR	./.:0:0:0	./.:27:0:27	./.:0:0:0	./.:0:0:0
unitig_0	4358687	4360035	DEL	-	-	-	1348	0	1	0	1	0	TM1119_g1389		unitig_0	4358687	4360035	PA7_GAP	-	-	-	unitig_0	4358676	DEL00000348	T	<DEL>	.	PASS	PRECISE;SVTYPE=DEL;SVMETHOD=EMBL.DELLYv0.7.7;CHR2=unitig_0;END=4360036;PE=24;MAPQ=60;CT=3to5;CIPOS=-9,9;CIEND=-9,9;INSLEN=0;HOMLEN=8;SR=10;SRQ=0.991525;CONSENSUS=TCATCTCGAACCACAAACTTCCAGCTTTGAGTACAATAAGGGTGGCATTCTCGCTCTTGAACCATCAACTCGTGTTTAGTGAACGATATGATAATGATTTCCATGTATAACGAGTCTT;CE=1.96592	GT:GL:GQ:FT:RCL:RC:RCR:CN:DR:DV:RR:RV	1/1:-52.8987,-4.21316,0:42:PASS:93:0:103:0:0:25:0:14	0/0:0,-12.9384,-153.294:129:PASS:337:388:419:1:63:0:43:0	0/0:0,-10.8318,-128.395:108:PASS:405:468:520:1:68:0:36:0	0/0:0,-17.1512,-205.492:10000:PASS:272:643:407:2:75:0:57:0	unitig_0	4358680	144	N	<DEL>	.	.	SVTYPE=DEL;STRANDS=+-:32;SVLEN=-1355;END=4360035;CIPOS=-4,3;CIEND=-10,9;CIPOS95=0,0;CIEND95=0,0;SU=32;PE=25;SR=7	GT:SU:PE:SR	./.:32:25:7	./.:0:0:0	./.:0:0:0	./.:0:0:0
unitig_0	4488857	4489244	-	-	-	DEL	387	0	0	0	0	0			unitig_0	4488857	4489244	-	-	-	PM449_GAP	unitig_0	4488856	DEL00000358	G	<DEL>	.	PASS	IMPRECISE;SVTYPE=DEL;SVMETHOD=EMBL.DELLYv0.7.7;CHR2=unitig_0;END=4489246;PE=69;MAPQ=60;CT=3to5;CIPOS=-50,50;CIEND=-50,50	GT:GL:GQ:FT:RCL:RC:RCR:CN:DR:DV:RR:RV	0/0:0,-7.5253,-145.7:75:PASS:2664:5888:2244:2:25:0:0:0	0/0:0,-14.148,-270.1:141:PASS:7361:14658:6649:2:47:0:0:0	0/0:0,-18.0618,-360:10000:PASS:7484:19536:10603:2:60:0:0:0	1/1:-407.4,-20.771,0:10000:PASS:9955:128:12671:0:0:69:0:0	unitig_0	4488856	122	N	<DEL>	.	.	SVTYPE=DEL;STRANDS=+-:33;SVLEN=-388;END=4489244;CIPOS=-10,9;CIEND=-2,0;CIPOS95=0,0;CIEND95=0,0;SU=33;PE=10;SR=23	GT:SU:PE:SR	./.:0:0:0	./.:0:0:0	./.:0:0:0	./.:33:10:23
unitig_0	4561867	4564945	DEL	DEL	DEL	DEL	3078	0	0	0	0	1		TM1119_g1445	unitig_0	4561867	4564945	PA7_GAP	PM1118_GAP	PM448_GAP	PM449_GAP	unitig_0	4561857	DEL00000366	A	<DEL>	.	PASS	PRECISE;SVTYPE=DEL;SVMETHOD=EMBL.DELLYv0.7.7;CHR2=unitig_0;END=4564946;PE=50;MAPQ=60;CT=3to5;CIPOS=-10,10;CIEND=-10,10;INSLEN=0;HOMLEN=9;SR=10;SRQ=1;CONSENSUS=TCGAAGAGTCTGTTCATGTCCATAGCCCCCCTGATCTTGACAAAAGTAGCAACTCCCTTGTCTGAAAAGTCGTGATTCCCACTTAGTATTAACAAATATTATCCTGGCGGAGGTATAGTGAAGAAAAAGAACATGGACAAGTTGAGACATGAGGGCCCTGAGTATGCCAATCATG;CE=1.98224	GT:GL:GQ:FT:RCL:RC:RCR:CN:DR:DV:RR:RV	1/1:-31.7984,-2.70771,0:27:PASS:235:0:212:0:0:30:0:9	1/1:-61.898,-5.11552,0:51:PASS:679:0:592:0:0:50:0:17	1/1:-64.7955,-5.71506,0:57:PASS:737:0:845:0:0:51:0:19	1/1:-226.794,-18.3568,0:10000:PASS:738:3:785:0:0:66:0:61	unitig_0	4561866	152	N	<DEL>	.	.	SVTYPE=DEL;STRANDS=+-:273;SVLEN=-3079;END=4564945;CIPOS=0,0;CIEND=0,0;CIPOS95=0,0;CIEND95=0,0;SU=273;PE=193;SR=80	GT:SU:PE:SR	./.:29:25:4	./.:65:50:15	./.:68:52:16	./.:111:66:45
unitig_0	4591528	4591851	-	DEL	-	-	323	0	0	0	0	0			unitig_0	4591528	4591851	-	PM1118_GAP	-	-	unitig_0	4591529	DEL00000369	A	<DEL>	.	PASS	PRECISE;SVTYPE=DEL;SVMETHOD=EMBL.DELLYv0.7.7;CHR2=unitig_0;END=4591852;PE=3;MAPQ=60;CT=3to5;CIPOS=-2,2;CIEND=-2,2;INSLEN=0;HOMLEN=2;SR=10;SRQ=0.97449;CONSENSUS=CAGATATCCTGTGTTCATAGTCGAGTATGTGAGTTCAAGTATTCCTTGTCGAAGAATAGTTTCATTGTATTAAGATGAGTTCCTTGGAGGAAGCGCATGATAGAGATAGTAGATTGCCTCTAGTAGTAGCTGTCAGGGCAAATTGCGCCATAGAGCTACATGGTTAGGGGGGTCCTTCGAAGACGATGACAAAAG;CE=1.96037	GT:GL:GQ:FT:RCL:RC:RCR:CN:DR:DV:RR:RV	0/0:0,-4.51364,-54.6982:45:PASS:2689:4744:2792:2:27:0:15:0	1/1:-62.1981,-5.11558,0:51:PASS:3250:8:1924:0:0:3:0:17	0/0:0,-2.7081,-32.0988:27:PASS:5854:8589:1100:2:4:0:9:0	0/0:0,-26.7824,-328.491:10000:PASS:15221:29729:18777:2:97:0:89:0	unitig_0	4591527	153	N	<DEL>	.	.	SVTYPE=DEL;STRANDS=+-:11;SVLEN=-324;END=4591851;CIPOS=-3,2;CIEND=-3,2;CIPOS95=0,0;CIEND95=0,0;SU=11;PE=0;SR=11	GT:SU:PE:SR	./.:0:0:0	./.:11:0:11	./.:0:0:0	./.:0:0:0
unitig_0	4600549	4601051	-	-	DEL	DEL	502	0	0	0	0	0			unitig_0	4600549	4601051	-	-	PM448_GAP	PM449_GAP	unitig_0	4600550	DEL00000370	G	<DEL>	.	PASS	IMPRECISE;SVTYPE=DEL;SVMETHOD=EMBL.DELLYv0.7.7;CHR2=unitig_0;END=4601050;PE=40;MAPQ=60;CT=3to5;CIPOS=-50,50;CIEND=-50,50	GT:GL:GQ:FT:RCL:RC:RCR:CN:DR:DV:RR:RV	0/0:0,-9.63294,-190.7:96:PASS:4003:7743:3212:2:32:0:0:0	0/0:0,-7.82677,-156:78:PASS:6167:11025:4057:2:26:0:0:0	1/1:-36.9998,-2.10703,0:21:PASS:5656:0:1776:0:0:7:0:0	1/1:-227.899,-12.0406,0:120:PASS:21362:2:16191:0:0:40:0:0	unitig_0	4600548	154	N	<DEL>	.	.	SVTYPE=DEL;STRANDS=+-:45;SVLEN=-503;END=4601051;CIPOS=-1,0;CIEND=-1,0;CIPOS95=0,0;CIEND95=0,0;SU=45;PE=19;SR=26	GT:SU:PE:SR	./.:0:0:0	./.:0:0:0	./.:8:6:2	./.:37:13:24
unitig_0	4618142	4618479	DEL	-	-	-	337	0	0	1	1	0	TM1119_g1456 exon		unitig_0	4618142	4618479	PA7_GAP	-	-	-	unitig_0	4618138	DEL00000373	G	<DEL>	.	PASS	PRECISE;SVTYPE=DEL;SVMETHOD=EMBL.DELLYv0.7.7;CHR2=unitig_0;END=4618480;PE=32;MAPQ=60;CT=3to5;CIPOS=-5,5;CIEND=-5,5;INSLEN=0;HOMLEN=4;SR=10;SRQ=0.984127;CONSENSUS=TATACCAGGTACGTACATGCTGTGAGATCCTGGCCTGAGGGCCCGCCCTGCTAGGACTTCAACATTGGCGGCGCGAGAGGCTGCAGGCGACGACGATTGGCCACGGCCTCTGCAGAAGAGAGGCTG;CE=1.9521	GT:GL:GQ:FT:RCL:RC:RCR:CN:DR:DV:RR:RV	1/1:-59.6963,-5.11384,0:51:PASS:2367:50:2207:0:0:32:0:17	0/0:0,-7.5222,-88.6964:75:PASS:12450:28320:9599:3:66:0:25:0	0/0:0,-6.91967,-79.396:69:PASS:12988:25396:9004:2:60:0:23:0	0/0:0,-5.41469,-61.1962:54:PASS:9676:16648:7563:2:49:0:18:0	unitig_0	4618141	155	N	<DEL>	.	.	SVTYPE=DEL;STRANDS=+-:12;SVLEN=-338;END=4618479;CIPOS=-10,8;CIEND=-3,2;CIPOS95=0,0;CIEND95=0,0;SU=12;PE=1;SR=11	GT:SU:PE:SR	./.:12:1:11	./.:0:0:0	./.:0:0:0	./.:0:0:0
unitig_0	4640710	4641377	-	-	-	DEL	667	0	0	0	0	0			unitig_0	4640710	4641377	-	-	-	PM449_GAP	unitig_0	4640710	DEL00000379	A	<DEL>	.	PASS	IMPRECISE;SVTYPE=DEL;SVMETHOD=EMBL.DELLYv0.7.7;CHR2=unitig_0;END=4641378;PE=82;MAPQ=60;CT=3to5;CIPOS=-126,126;CIEND=-126,126	GT:GL:GQ:FT:RCL:RC:RCR:CN:DR:DV:RR:RV	./.:0,0,0:0:LowQual:61:109:36:2:0:0:0:0	0/0:0,-0.903089,-18:10:LowQual:71:192:89:2:3:0:0:0	./.:0,0,0:0:LowQual:135:81:0:1:0:0:0:0	1/1:-477.099,-24.9849,0:10000:PASS:196:0:193:0:0:83:0:0	unitig_0	4640708	157	N	<DEL>	.	.	SVTYPE=DEL;STRANDS=+-:82;SVLEN=-669;END=4641377;CIPOS=-10,294;CIEND=-222,0;CIPOS95=0,60;CIEND95=-68,0;IMPRECISE;SU=82;PE=82;SR=0	GT:SU:PE:SR	./.:0:0:0	./.:0:0:0	./.:0:0:0	./.:82:82:0
unitig_0	4640921	4649087	-	-	DEL	-	8166	0	0	0	0	2		TM1119_g1468;TM1119_g1469	unitig_0	4640921	4649087	-	-	PM448_GAP	-	unitig_0	4640918	DEL00000380	T	<DEL>	.	PASS	PRECISE;SVTYPE=DEL;SVMETHOD=EMBL.DELLYv0.7.7;CHR2=unitig_0;END=4649088;PE=49;MAPQ=60;CT=3to5;CIPOS=-3,3;CIEND=-3,3;INSLEN=0;HOMLEN=3;SR=10;SRQ=0.964912;CONSENSUS=TCTCCAGGAAGACCGGCGCTTTCGTTCGCTCGTGGAGCTGTGGCTCGAAAGTTGCCGAAAGCTCATTGCAATCGCGGTTTTTTATCTTTGCTTGCTGGACTTCACACTGTCCTGCACCATGTCTGCCACCCAGGGAACTCTCACCGTCTTCGTCGGAGAGTCATGGTCAT;CE=1.97144	GT:GL:GQ:FT:RCL:RC:RCR:CN:DR:DV:RR:RV	./.:0,0,0:0:LowQual:644:1282:660:2:28:0:0:0	0/0:0,-6.61941,-76.6967:66:PASS:730:2226:1280:2:50:0:22:0	1/1:-164.393,-13.8406,0:138:PASS:1000:20:1809:0:0:49:0:46	./.:0,0,0:0:LowQual:2180:2417:1809:1:0:0:0:0	unitig_0	4640920	159	N	<DEL>	.	.	SVTYPE=DEL;STRANDS=+-:83;SVLEN=-8172;END=4649092;CIPOS=0,0;CIEND=-10,4;CIPOS95=0,0;CIEND95=0,0;SU=83;PE=49;SR=34	GT:SU:PE:SR	./.:0:0:0	./.:0:0:0	./.:83:49:34	./.:0:0:0
unitig_0	4642119	4645014	-	-	-	DEL	2895	1	0	0	1	0	TM1119_g1468		unitig_0	4642119	4645014	-	-	-	PM449_GAP	unitig_0	4642119	DEL00000381	A	<DEL>	.	PASS	IMPRECISE;SVTYPE=DEL;SVMETHOD=EMBL.DELLYv0.7.7;CHR2=unitig_0;END=4645015;PE=36;MAPQ=60;CT=3to5;CIPOS=-107,107;CIEND=-107,107	GT:GL:GQ:FT:RCL:RC:RCR:CN:DR:DV:RR:RV	0/0:0,-10.2267,-159.292:102:PASS:218:475:221:2:34:0:0:0	0/0:0,-13.8446,-270.597:138:PASS:453:611:453:1:46:0:0:0	./.:0,0,0:0:LowQual:106:13:4:0:0:0:0:0	1/1:-312.9,-16.5563,0:10000:PASS:444:184:503:0:0:55:0:0	unitig_0	4642118	158	N	<DEL>	.	.	SVTYPE=DEL;STRANDS=+-:77;SVLEN=-2896;END=4645014;CIPOS=-10,9;CIEND=-3,0;CIPOS95=0,0;CIEND95=0,0;SU=77;PE=64;SR=13	GT:SU:PE:SR	./.:0:0:0	./.:0:0:0	./.:0:0:0	./.:77:64:13
unitig_0	4663848	4667069	-	-	-	DEL	3221	1	1	0	2	0	TM1119_g1473; TM1119_g1474		unitig_0	4663848	4667069	-	-	-	PM449_GAP	unitig_0	4663848	DEL00000383	A	<DEL>	.	PASS	IMPRECISE;SVTYPE=DEL;SVMETHOD=EMBL.DELLYv0.7.7;CHR2=unitig_0;END=4667070;PE=60;MAPQ=60;CT=3to5;CIPOS=-50,50;CIEND=-50,50	GT:GL:GQ:FT:RCL:RC:RCR:CN:DR:DV:RR:RV	0/0:0,-10.1718,-158.937:102:PASS:236:481:170:2:34:0:0:0	0/0:0,-16.5562,-325.2:10000:PASS:525:1167:533:2:55:0:0:0	0/0:0,-27.9947,-553.499:10000:PASS:787:1561:452:3:93:0:0:0	1/1:-352.7,-18.0618,0:10000:PASS:835:3:761:0:0:60:0:0	unitig_0	4663847	161	N	<DEL>	.	.	SVTYPE=DEL;STRANDS=+-:82;SVLEN=-3222;END=4667069;CIPOS=-10,9;CIEND=-10,9;CIPOS95=0,0;CIEND95=0,0;SU=82;PE=63;SR=19	GT:SU:PE:SR	./.:0:0:0	./.:0:0:0	./.:0:0:0	./.:82:63:19
unitig_0	4668029	4672812	DEL	-	DEL	-	4783	0	1	0	1	0	TM1119_g1475 almost all		unitig_0	4668029	4672812	PA7_GAP	-	PM448_GAP	-	unitig_0	4668026	DEL00000385	T	<DEL>	.	PASS	PRECISE;SVTYPE=DEL;SVMETHOD=EMBL.DELLYv0.7.7;CHR2=unitig_0;END=4672813;PE=66;MAPQ=60;CT=3to5;CIPOS=-4,4;CIEND=-4,4;INSLEN=0;HOMLEN=3;SR=10;SRQ=0.967949;CONSENSUS=TCCGTTCATTTCAACATCTCGCCACTGCGGAGCAACAGGGTCCCTCAGTTTTCCTCAAGTTTCGACCAGCAAGCGACCTGCTGCGAATGTGTGCGCAATGCGGCAATGTGGTACAGTGGCCCGCCTCTGCTTCCATCTCGCCGTTCACCCATCCCC;CE=1.9551	GT:GL:GQ:FT:RCL:RC:RCR:CN:DR:DV:RR:RV	1/1:-44.2959,-3.90928,0:39:PASS:379:0:425:0:0:37:0:13	0/0:0,-11.7351,-141.695:117:PASS:958:1612:1053:2:34:0:39:0	1/1:-177.78,-15.6332,0:157:PASS:1345:0:1577:0:0:66:0:52	0/0:0,-17.7524,-211.192:10000:PASS:449:2293:627:4:91:1:59:0	unitig_0	4668028	164	N	<DEL>	.	.	SVTYPE=DEL;STRANDS=+-:146;SVLEN=-4784;END=4672812;CIPOS=0,0;CIEND=0,0;CIPOS95=0,0;CIEND95=0,0;SU=146;PE=106;SR=40	GT:SU:PE:SR	./.:42:37:5	./.:0:0:0	./.:103:68:35	./.:1:1:0
unitig_0	4672050	4672176	-	DEL	-	-	126	0	1	0	1	0	TM1119_g1475 end		unitig_0	4672050	4672176	-	PM1118_GAP	-	-	unitig_0	4672041	DEL00000386	GCGAGCCCGAGCCCAACATGGGCGCGATGCAGGGTCCTAGAGGCCGACGTCACACATGTCAAGGGCGGCATGTCGCCCTGGCAGCAGATCCCGCCGTGGCCAGCATCACCTACTAGCTGACCGCGCGGGACGCGTC	G	.	PASS	PRECISE;SVTYPE=DEL;SVMETHOD=EMBL.DELLYv0.7.7;CHR2=unitig_0;END=4672177;PE=0;MAPQ=60;CT=3to5;CIPOS=-9,9;CIEND=-9,9;INSLEN=0;HOMLEN=8;SR=10;SRQ=0.981013;CONSENSUS=AGGAGCAAGATCGATGATATCTTCGTAACCACCACCGACGTCGCCTCAGCCACCACCCGCCCGGCGGCGAGCCCGTCACGACGTTGCTCGAGGACACAACGTATATGACCGGCAGCGACAAAACGATTCGCCCCTATCTCTCGGTCGAGTTCCAGGAG;CE=1.94701	GT:GL:GQ:FT:RCL:RC:RCR:CN:DR:DV:RR:RV	./.:0,0,0:0:LowQual:0:0:0:-1:0:0:0:0	1/1:-152.493,-10.0402,0:100:PASS:3245:383:2957:0:0:0:1:45	./.:0,0,0:0:LowQual:0:0:0:-1:0:0:0:0	1/1:-204.19,-17.7511,0:10000:PASS:4010:405:3136:0:0:0:0:59	unitig_0	4672049	162	N	<DEL>	.	.	SVTYPE=DEL;STRANDS=+-:80;SVLEN=-127;END=4672176;CIPOS=0,0;CIEND=0,0;CIPOS95=0,0;CIEND95=0,0;SU=80;PE=0;SR=80	GT:SU:PE:SR	./.:0:0:0	./.:29:0:29	./.:0:0:0	./.:51:0:51
unitig_0	4672050	4672183	-	-	-	DEL	133	0	1	0	1	0	TM1119_g1475 end		unitig_0	4672050	4672183	-	-	-	PM449_GAP	unitig_0	4672041	DEL00000386	GCGAGCCCGAGCCCAACATGGGCGCGATGCAGGGTCCTAGAGGCCGACGTCACACATGTCAAGGGCGGCATGTCGCCCTGGCAGCAGATCCCGCCGTGGCCAGCATCACCTACTAGCTGACCGCGCGGGACGCGTC	G	.	PASS	PRECISE;SVTYPE=DEL;SVMETHOD=EMBL.DELLYv0.7.7;CHR2=unitig_0;END=4672177;PE=0;MAPQ=60;CT=3to5;CIPOS=-9,9;CIEND=-9,9;INSLEN=0;HOMLEN=8;SR=10;SRQ=0.981013;CONSENSUS=AGGAGCAAGATCGATGATATCTTCGTAACCACCACCGACGTCGCCTCAGCCACCACCCGCCCGGCGGCGAGCCCGTCACGACGTTGCTCGAGGACACAACGTATATGACCGGCAGCGACAAAACGATTCGCCCCTATCTCTCGGTCGAGTTCCAGGAG;CE=1.94701	GT:GL:GQ:FT:RCL:RC:RCR:CN:DR:DV:RR:RV	./.:0,0,0:0:LowQual:0:0:0:-1:0:0:0:0	1/1:-152.493,-10.0402,0:100:PASS:3245:383:2957:0:0:0:1:45	./.:0,0,0:0:LowQual:0:0:0:-1:0:0:0:0	1/1:-204.19,-17.7511,0:10000:PASS:4010:405:3136:0:0:0:0:59	unitig_0	4672049	162	N	<DEL>	.	.	SVTYPE=DEL;STRANDS=+-:80;SVLEN=-127;END=4672176;CIPOS=0,0;CIEND=0,0;CIPOS95=0,0;CIEND95=0,0;SU=80;PE=0;SR=80	GT:SU:PE:SR	./.:0:0:0	./.:29:0:29	./.:0:0:0	./.:51:0:51
unitig_0	4672899	4673049	-	DEL	-	-	150	1	0	0	1	0	TM1119_g1476		unitig_0	4672899	4673049	-	PM1118_GAP	-	-	unitig_0	4672897	DEL00000387	GGGTAGACGACCATGTGCGTCGATCTCCCCTCCATGCAATCTTTTGTCATCCATCACCGAGCTTGTTAGTATCGTCTGCGGTAACCTTTGCGCCCGACCGGCCAATCTAGAGAGTGTTCTCCTTTCGAGCCCGACAGCGGAGCGTCATATGAT	G	.	PASS	PRECISE;SVTYPE=DEL;SVMETHOD=EMBL.DELLYv0.7.7;CHR2=unitig_0;END=4673050;PE=0;MAPQ=60;CT=3to5;CIPOS=-2,2;CIEND=-2,2;INSLEN=0;HOMLEN=1;SR=10;SRQ=0.951872;CONSENSUS=TGATAGGCGAATGTGTGCGCAATGCGGCAATGTGATACAGTGGCATATCTCTGCTTCCATCTCGCCGTTCACCCATCCCCCCATTGTCAGGGAACCTGCACAGCGGATGCCGCGTCGGGGCATCCGCCATGGTATACGCCATCTCCGCCACCAAGCTCCTCCTCGTCGTCATCGCGGTTGTCTCCAT;CE=1.95992	GT:GL:GQ:FT:RCL:RC:RCR:CN:DR:DV:RR:RV	0/0:0,-3.30776,-36.2964:33:PASS:1049:1947:1332:2:0:0:11:0	1/1:-142.896,-8.83785,0:88:PASS:2223:134:3538:0:0:0:1:40	0/0:0,-19.857,-232.989:10000:PASS:4601:12412:6650:2:0:0:66:0	0/0:0,-18.0531,-211.391:10000:PASS:5528:11742:4735:2:0:0:60:0	unitig_0	4672898	163	N	<DEL>	.	.	SVTYPE=DEL;STRANDS=+-:31;SVLEN=-151;END=4673049;CIPOS=-1,0;CIEND=-1,0;CIPOS95=0,0;CIEND95=0,0;SU=31;PE=0;SR=31	GT:SU:PE:SR	./.:0:0:0	./.:31:0:31	./.:0:0:0	./.:0:0:0
unitig_0	4673364	4674389	-	-	-	DEL	1025	0	0	1	1	0	TM1119_g1476		unitig_0	4673364	4674389	-	-	-	PM449_GAP	unitig_0	4673363	DEL00000388	G	<DEL>	.	PASS	PRECISE;SVTYPE=DEL;SVMETHOD=EMBL.DELLYv0.7.7;CHR2=unitig_0;END=4674390;PE=65;MAPQ=60;CT=3to5;CIPOS=-2,2;CIEND=-2,2;INSLEN=0;HOMLEN=1;SR=10;SRQ=0.957317;CONSENSUS=AAGCTCTTCTCGATGTCGCGGACCAGCTCCTGGAGGTGGGATATGGGCAGACGGACCGTCTGCTTGAGGCGCGCTATGCTGAGGGCTATTCATGCTATGCTATGCTGGGCCAGGTCGGGCTAGACTGTGGTGTGGCGTGGTGTGCTGTTGAACTCACCTGATT;CE=1.93806	GT:GL:GQ:FT:RCL:RC:RCR:CN:DR:DV:RR:RV	0/0:0,-2.70821,-32.5989:27:PASS:95:193:93:2:36:0:9:0	0/0:0,-16.5478,-194.191:10000:PASS:159:517:231:3:67:0:55:0	0/0:0,-29.4846,-345.984:10000:PASS:348:726:321:2:101:0:98:0	1/1:-175.692,-15.0432,0:150:PASS:227:0:247:0:0:64:0:50	unitig_0	4673363	165	N	<DEL>	.	.	SVTYPE=DEL;STRANDS=+-:105;SVLEN=-1026;END=4674389;CIPOS=0,0;CIEND=0,0;CIPOS95=0,0;CIEND95=0,0;SU=105;PE=67;SR=38	GT:SU:PE:SR	./.:0:0:0	./.:0:0:0	./.:0:0:0	./.:105:67:38
unitig_0	4689526	4690048	-	-	-	DEL	522	0	0	0	0	0			unitig_0	4689526	4690048	-	-	-	PM449_GAP	unitig_0	4689521	DEL00000390	A	<DEL>	.	PASS	IMPRECISE;SVTYPE=DEL;SVMETHOD=EMBL.DELLYv0.7.7;CHR2=unitig_0;END=4690046;PE=69;MAPQ=60;CT=3to5;CIPOS=-147,147;CIEND=-147,147	GT:GL:GQ:FT:RCL:RC:RCR:CN:DR:DV:RR:RV	1/1:-6.19931,-0.60137,0:7:LowQual:44:1:60:0:0:2:0:0	0/0:0,-3.91338,-77:39:PASS:13:47:44:2:13:0:0:0	1/1:-10.9,-0.602055,0:7:LowQual:4:0:11:0:0:2:0:0	1/1:-371.897,-20.7683,0:10000:PASS:189:0:167:0:0:69:0:0	unitig_0	4689516	166	N	<DEL>	.	.	SVTYPE=DEL;STRANDS=+-:11;SVLEN=-537;END=4690053;CIPOS=-10,264;CIEND=-451,9;CIPOS95=0,124;CIEND95=-196,0;IMPRECISE;SU=11;PE=11;SR=0	GT:SU:PE:SR	./.:2:2:0	./.:0:0:0	./.:2:2:0	./.:7:7:0
unitig_0	4710327	4713759	DEL	-	-	-	3432	0	0	0	0	1		TM1119_g1487	unitig_0	4710327	4713759	PA7_GAP	-	-	-	unitig_0	4710093	DEL00000394	G	<DEL>	.	PASS	IMPRECISE;SVTYPE=DEL;SVMETHOD=EMBL.DELLYv0.7.7;CHR2=unitig_0;END=4713760;PE=18;MAPQ=60;CT=3to5;CIPOS=-50,50;CIEND=-50,50	GT:GL:GQ:FT:RCL:RC:RCR:CN:DR:DV:RR:RV	1/1:-102.4,-5.71927,0:57:PASS:289:33:194:0:0:19:0:0	0/0:0,-0.30103,-6:5:LowQual:812:390:3:1:1:0:0:0	./.:0,0,0:0:LowQual:876:532:0:1:0:0:0:0	./.:0,0,0:0:LowQual:894:1547:0:3:0:0:0:0	unitig_0	4710326	169	N	<DEL>	.	.	SVTYPE=DEL;STRANDS=+-:46;SVLEN=-3433;END=4713759;CIPOS=-10,0;CIEND=-10,9;CIPOS95=0,0;CIEND95=0,0;SU=46;PE=37;SR=9	GT:SU:PE:SR	./.:46:37:9	./.:0:0:0	./.:0:0:0	./.:0:0:0
unitig_0	4714613	4715919	DEL	-	-	-	1306	1	0	0	1	0	TM1119_g1488		unitig_0	4714613	4715919	PA7_GAP	-	-	-	unitig_0	4714611	DEL00000396	A	<DEL>	.	PASS	PRECISE;SVTYPE=DEL;SVMETHOD=EMBL.DELLYv0.7.7;CHR2=unitig_0;END=4715920;PE=52;MAPQ=60;CT=3to5;CIPOS=-4,4;CIEND=-4,4;INSLEN=0;HOMLEN=5;SR=10;SRQ=0.96875;CONSENSUS=GTATCTACCCGGTCCCTAAGTGCTCGTAGCCCCTTAAGTAGCTGATATGTCCCAACGATCGAAGGGCTTGGAAAGGAGTGGTCGAGAAGGAGAGGTATTTGATGGCAATCTTGGGGAGCGTCGAGGCG;CE=1.97165	GT:GL:GQ:FT:RCL:RC:RCR:CN:DR:DV:RR:RV	1/1:-41.7968,-3.60912,0:36:PASS:147:0:117:0:0:52:0:12	./.:0,0,0:0:LowQual:0:2:0:-1:0:0:0:0	./.:0,0,0:0:LowQual:0:0:0:-1:0:0:0:0	./.:0,0,0:0:LowQual:0:1:1:2:0:0:0:0	unitig_0	4714612	170	N	<DEL>	.	.	SVTYPE=DEL;STRANDS=+-:57;SVLEN=-1307;END=4715919;CIPOS=-4,5;CIEND=-7,3;CIPOS95=0,0;CIEND95=0,0;SU=57;PE=52;SR=5	GT:SU:PE:SR	./.:57:52:5	./.:0:0:0	./.:0:0:0	./.:0:0:0
unitig_0	4752835	4756989	-	-	-	DEL	4154	0	0	0	0	1		TM1119_g1497	unitig_0	4752835	4756989	-	-	-	PM449_GAP	unitig_0	4752831	DEL00000424	C	<DEL>	.	PASS	PRECISE;SVTYPE=DEL;SVMETHOD=EMBL.DELLYv0.7.7;CHR2=unitig_0;END=4756990;PE=70;MAPQ=60;CT=3to5;CIPOS=-4,4;CIEND=-4,4;INSLEN=0;HOMLEN=4;SR=10;SRQ=0.962733;CONSENSUS=GGAGGCTATGACTTTTGGTATCGTGGATTCAAGGGCGGGTTCTTCTTACAATAGAGGCATCGTACAATTATCCGCCGATGTGGGAGAGTGATGCGGCAACTTTCAACAGCTTTCGACACGTCGCGTGACTGTTCTCGCCTCATCTGTTATGAGAGAGTTG;CE=1.98075	GT:GL:GQ:FT:RCL:RC:RCR:CN:DR:DV:RR:RV	0/0:0,-0.902091,-9.699:10:LowQual:377:604:187:2:30:0:3:0	0/0:0,-3.61082,-43.0985:36:PASS:362:1712:316:5:19:0:12:0	0/0:0,-3.00904,-35.8987:30:PASS:519:1585:560:3:20:0:10:0	1/1:-222.888,-19.2541,0:10000:PASS:1057:8:1154:0:0:70:0:64	unitig_0	4752834	174	N	<DEL>	.	.	SVTYPE=DEL;STRANDS=+-:118;SVLEN=-4155;END=4756989;CIPOS=0,0;CIEND=0,0;CIPOS95=0,0;CIEND95=0,0;SU=118;PE=71;SR=47	GT:SU:PE:SR	./.:0:0:0	./.:0:0:0	./.:0:0:0	./.:118:71:47
unitig_0	4767121	4768384	-	-	-	DEL	1263	0	0	0	0	0			unitig_0	4767121	4768384	-	-	-	PM449_GAP	unitig_0	4767109	DEL00000429	A	<DEL>	.	PASS	IMPRECISE;SVTYPE=DEL;SVMETHOD=EMBL.DELLYv0.7.7;CHR2=unitig_0;END=4768385;PE=6;MAPQ=37;CT=3to5;CIPOS=-523,523;CIEND=-523,523	GT:GL:GQ:FT:RCL:RC:RCR:CN:DR:DV:RR:RV	./.:0,0,0:0:LowQual:0:0:0:-1:0:0:0:0	0/0:0,-2.70888,-48.1996:27:PASS:61:196:72:3:9:0:0:0	./.:0,0,0:0:LowQual:0:0:0:-1:0:0:0:0	1/1:-20.9991,-1.80526,0:18:PASS:360:0:361:0:0:6:0:0	unitig_0	4767107	123	N	<DEL>	.	.	SVTYPE=DEL;STRANDS=+-:9;SVLEN=-1277;END=4768384;CIPOS=-4,531;CIEND=-653,9;CIPOS95=0,335;CIEND95=-330,0;IMPRECISE;SU=9;PE=9;SR=0	GT:SU:PE:SR	./.:0:0:0	./.:0:0:0	./.:0:0:0	./.:9:9:0
unitig_0	4778061	4780386	-	-	DEL	-	2325	0	0	0	0	0			unitig_0	4778061	4780386	-	-	PM448_GAP	-	unitig_0	4778060	DEL00000430	T	<DEL>	.	PASS	PRECISE;SVTYPE=DEL;SVMETHOD=EMBL.DELLYv0.7.7;CHR2=unitig_0;END=4780387;PE=6;MAPQ=60;CT=3to5;CIPOS=-3,3;CIEND=-3,3;INSLEN=0;HOMLEN=3;SR=8;SRQ=0.964824;CONSENSUS=AGATATGGGGCGAGAACTGAAGGTTCATCAGCTGAGATAGGCAGCGATATGAGCCGAAGCCTTCTTGGATCGCTTCAAAGACCATAGACATAAAGAATTCTGTTAAGTATGTTTCGACGACCTTAACATTGTCATGACCTATGTCGAAATATTTGTATCTTCGCTACCTCTCGTACAACGCCATCGAAGCGGTCTTC;CE=1.98997	GT:GL:GQ:FT:RCL:RC:RCR:CN:DR:DV:RR:RV	0/0:0,-2.40671,-28.8985:24:PASS:448:463:204:1:44:0:8:0	0/0:0,-1.20353,-13.8994:12:LowQual:159:320:187:2:20:0:4:0	1/1:-18.4995,-1.50465,0:15:PASS:26:0:153:0:0:6:0:5	0/0:0,-10.5312,-129.395:105:PASS:650:1320:662:2:115:0:35:0	unitig_0	4778038	176	N	<DEL>	.	.	SVTYPE=DEL;STRANDS=+-:8;SVLEN=-2348;END=4780386;CIPOS=0,6;CIEND=-10,6;CIPOS95=0,6;CIEND95=-1,0;IMPRECISE;SU=8;PE=6;SR=2	GT:SU:PE:SR	./.:0:0:0	./.:0:0:0	./.:8:6:2	./.:0:0:0
unitig_0	4815583	4816831	-	-	DEL	-	1248	0	0	0	0	0			unitig_0	4815583	4816831	-	-	PM448_GAP		unitig_0	4815596	DEL00000436	G	<DEL>	.	PASS	IMPRECISE;SVTYPE=DEL;SVMETHOD=EMBL.DELLYv0.7.7;CHR2=unitig_0;END=4816832;PE=42;MAPQ=60;CT=3to5;CIPOS=-50,50;CIEND=-50,50	GT:GL:GQ:FT:RCL:RC:RCR:CN:DR:DV:RR:RV	0/0:0,-9.63295,-192:96:PASS:99:187:87:2:32:0:0:0	0/0:0,-8.42883,-168:84:PASS:155:396:193:2:28:0:0:0	1/1:-249.6,-12.6432,0:126:PASS:99:0:297:0:0:42:0:0	1/1:-227.6,-12.0411,0:120:PASS:105:4:290:0:0:40:0:0	unitig_0	4815592	125	N	<DEL>	.	.	SVTYPE=DEL;STRANDS=+-:145;SVLEN=-1239;END=4816831;CIPOS=-8,7;CIEND=-4,9;CIPOS95=0,0;CIEND95=0,0;SU=145;PE=94;SR=51	GT:SU:PE:SR	./.:0:0:0	./.:0:0:0	./.:75:48:27	./.:70:46:24
unitig_0	4838023	4844399	DEL	DEL	DEL	DEL	6376	0	0	0	0	1		TM1119_g1522	unitig_0	4838023	4844399	PA7_GAP	PM1118_GAP	PM448_GAP	PM449_GAP	unitig_0	4838023	DEL00000444	A	<DEL>	.	PASS	IMPRECISE;SVTYPE=DEL;SVMETHOD=EMBL.DELLYv0.7.7;CHR2=unitig_0;END=4844400;PE=68;MAPQ=60;CT=3to5;CIPOS=-59,59;CIEND=-59,59	GT:GL:GQ:FT:RCL:RC:RCR:CN:DR:DV:RR:RV	1/1:-194.794,-10.8312,0:108:PASS:542:0:532:0:0:36:0:0	1/1:-85.0989,-4.51435,0:45:PASS:498:19:832:0:0:15:0:0	1/1:-130,-6.62261,0:66:PASS:704:1:1548:0:0:22:0:0	1/1:-403,-20.4698,0:10000:PASS:1696:7:1552:0:0:68:0:0	unitig_0	4838022	188	N	<DEL>	.	.	SVTYPE=DEL;STRANDS=+-:181;SVLEN=-6382;END=4844404;CIPOS=0,0;CIEND=0,0;CIPOS95=0,0;CIEND95=0,0;SU=181;PE=143;SR=38	GT:SU:PE:SR	./.:35:35:0	./.:23:15:8	./.:23:22:1	./.:100:71:29
unitig_0	4847207	4847641	-	DEL	-	-	434	0	0	0	0	0			unitig_0	4847207	4847641	-	PM1118_GAP	-	-	unitig_0	4847206	DEL00000446	C	<DEL>	.	PASS	PRECISE;SVTYPE=DEL;SVMETHOD=EMBL.DELLYv0.7.7;CHR2=unitig_0;END=4847646;PE=19;MAPQ=60;CT=3to5;CIPOS=-4,4;CIEND=-4,4;INSLEN=0;HOMLEN=3;SR=10;SRQ=0.95045;CONSENSUS=TTGAAGGCGGCCTGACAGAGCTATAGGTATGATAGTATAAGGTAGATTTTAGCTCTTTATAGTTTCCTTATCAAATCCTAGGAAGCTAAGACAATAGTGTTTAAGACACACTTGTGACCATACATACACACACAAAACCAATTAACGCCCGGCAGCTGAGCCGAAAGGGCAACTATCACTGATTACAAGTATATTTCCTCATTAAACTGAACTCT;CE=1.95803	GT:GL:GQ:FT:RCL:RC:RCR:CN:DR:DV:RR:RV	./.:0,0,0:0:LowQual:3482:5816:3411:2:0:0:0:0	1/1:-65.0979,-5.41641,0:54:PASS:3396:296:4941:0:1:19:0:18	0/0:0,-22.5656,-266.588:10000:PASS:11263:36630:9405:4:89:0:75:0	0/0:0,-11.1329,-131.195:111:PASS:17757:32126:16378:2:88:0:37:0	unitig_0	4847206	189	N	<DEL>	.	.	SVTYPE=DEL;STRANDS=+-:17;SVLEN=-439;END=4847645;CIPOS=-3,2;CIEND=-3,1;CIPOS95=0,0;CIEND95=0,0;SU=17;PE=7;SR=10	GT:SU:PE:SR	./.:0:0:0	./.:17:7:10	./.:0:0:0	./.:0:0:0
unitig_0	4867504	4867624	DEL	-	-	-	120	0	0	0	0	0			unitig_0	4867504	4867624	PA7_GAP	-	-	-	unitig_0	4867506	DEL00000451	GGGGCCTTGCTTTTCTTGCAAAGATCGCAGTTGCGGATCACCTGCTCGACTTGAGCCCTAGTTCCTTTGAACTGGTGATGTTGTCGGAGACGTTGGTAGGTTTTCCACACTCCTTGATC	G	.	PASS	PRECISE;SVTYPE=DEL;SVMETHOD=EMBL.DELLYv0.7.7;CHR2=unitig_0;END=4867625;PE=0;MAPQ=60;CT=3to5;CIPOS=-3,3;CIEND=-3,3;INSLEN=0;HOMLEN=3;SR=10;SRQ=0.968504;CONSENSUS=TGATACTGAGTGCCATGGCGCATCGGGTATTTGGAGTGGTCGGATTTCTCCATAGGGTTTGTGTCGGCCGTGTGCCTTGGCTTCGTGGACTTCCTTAATCAGTCGGGTCTCATCTCTGGCGACGG;CE=1.91664	GT:GL:GQ:FT:RCL:RC:RCR:CN:DR:DV:RR:RV	1/1:-57.397,-4.81344,0:48:PASS:820:7:472:0:0:0:0:16	0/0:0,-2.40742,-29.5992:24:PASS:1129:3483:1568:3:0:0:8:0	./.:0,0,0:0:LowQual:0:0:0:-1:0:0:0:0	0/0:0,-7.22209,-87.8974:72:PASS:4376:6713:3427:2:0:0:24:0	unitig_0	4867503	191	N	<DEL>	.	.	SVTYPE=DEL;STRANDS=+-:7;SVLEN=-121;END=4867624;CIPOS=-5,4;CIEND=-5,4;CIPOS95=0,0;CIEND95=0,0;SU=7;PE=0;SR=7	GT:SU:PE:SR	./.:7:0:7	./.:0:0:0	./.:0:0:0	./.:0:0:0
unitig_0	4913752	4917205	-	-	-	DEL	3453	0	1	0	1	0	TM1119_g1545		unitig_0	4913752	4917205	-	-	-	PM449_GAP	unitig_0	4913749	DEL00000454	T	<DEL>	.	PASS	PRECISE;SVTYPE=DEL;SVMETHOD=EMBL.DELLYv0.7.7;CHR2=unitig_0;END=4917206;PE=83;MAPQ=60;CT=3to5;CIPOS=-3,3;CIEND=-3,3;INSLEN=0;HOMLEN=3;SR=10;SRQ=0.993548;CONSENSUS=GAAGGAAGTCTGCTGGGAAAATATAGCCGATGGGATATCGACCATGAAGGAGGGGAAACCTGTTACAACCTACCGCGCCATGAAACGGTTCGCGCGACGTTGGCAAAACGGAAGGTAAATTGTCGCGATGTATCCGGTATGTGTGCGAATACGGA;CE=1.96246	GT:GL:GQ:FT:RCL:RC:RCR:CN:DR:DV:RR:RV	./.:0,0,0:0:LowQual:340:0:248:0:0:52:0:0	0/0:0,-4.51318,-53.4977:45:PASS:460:545:1394:1:27:0:15:0	0/0:0,-6.31887,-75.1972:63:PASS:603:818:1256:1:16:0:21:0	1/1:-240.29,-20.4598,0:10000:PASS:947:2:619:0:0:82:0:68	unitig_0	4913751	196	N	<DEL>	.	.	SVTYPE=DEL;STRANDS=+-:191;SVLEN=-3454;END=4917205;CIPOS=0,0;CIEND=0,0;CIPOS95=0,0;CIEND95=0,0;SU=191;PE=134;SR=57	GT:SU:PE:SR	./.:58:51:7	./.:0:0:0	./.:0:0:0	./.:133:83:50
unitig_0	4923151	4923361	-	-	-	DEL	210	0	0	0	0	0			unitig_0	4923151	4923361	-	-	-	PM449_GAP	unitig_0	4923150	DEL00000459	ATACGGCCGCATTCCTTTCAAGAACCACCGGTACTCGGTCATTCGCGAACGGCTACTAAACTCGAATTATGCGGAGTCGGGTCAAACGATCGTCCCATATATGGATCGGAAGCTAACCGCAATCGTCAACTTCCGACTCCTTCCCGGGCACCGCTCCTAATGTCAGTCGGTAATGATACTGGATCGTCCAAGGCCCCATGTTGAGGTTTGCG	A	.	PASS	PRECISE;SVTYPE=DEL;SVMETHOD=EMBL.DELLYv0.7.7;CHR2=unitig_0;END=4923362;PE=0;MAPQ=60;CT=3to5;CIPOS=-1,1;CIEND=-1,1;INSLEN=0;HOMLEN=0;SR=10;SRQ=0.988095;CONSENSUS=CATTATCTCCATAGATTTTCGCCTGCTTAAGAGAGACCGGTGATGTGGCGGTGCGTGGCTGCATGCGATCCGTTGTGGCTGCCGGCCTTAAGGGCCCCGTACTAGACCATGGCAAGTGGTTATAGAGTAGTCATAATATATACTAAGACTCTCCTCGCCTAGTCTTCG;CE=1.99122	GT:GL:GQ:FT:RCL:RC:RCR:CN:DR:DV:RR:RV	0/0:0,-3.60898,-41.3966:36:PASS:1734:2131:1567:1:0:0:12:0	0/0:0,-9.93045,-121.296:99:PASS:5994:7014:4439:1:0:0:33:0	0/0:0,-5.41492,-63.2964:54:PASS:4786:9352:4710:2:0:0:18:0	1/1:-130.595,-10.832,0:108:PASS:7554:22:4819:0:0:0:0:36	unitig_0	4923150	197	N	<DEL>	.	.	SVTYPE=DEL;STRANDS=+-:30;SVLEN=-211;END=4923361;CIPOS=-1,0;CIEND=-1,0;CIPOS95=0,0;CIEND95=0,0;SU=30;PE=0;SR=30	GT:SU:PE:SR	./.:0:0:0	./.:0:0:0	./.:0:0:0	./.:30:0:30
unitig_0	4937423	4937608	DEL	-	DEL	-	185	0	0	0	0	0			unitig_0	4937423	4937608	PA7_GAP	-	PM448_GAP	-	unitig_0	4937422	DEL00000463	AGCGAGTCACCGGACACAGCTCCCTAATAGGCTCGGCCTGTTGCTTGAGAATTATTTAGGAGCAGCGAGAGCAGCGAGCTTCCCTCGCTGCTCACACCAGTCCCTACCTAGACAGCTTTCAATCTAAGTCTTTGTCTGATTCTCAGAGAGAGAGGCAACAAACCTTACGCCACCCTTATCAGTGCAC	A	.	PASS	PRECISE;SVTYPE=DEL;SVMETHOD=EMBL.DELLYv0.7.7;CHR2=unitig_0;END=4937609;PE=0;MAPQ=60;CT=3to5;CIPOS=-2,2;CIEND=-2,2;INSLEN=0;HOMLEN=2;SR=10;SRQ=0.95858;CONSENSUS=CTGGACGACCAGGTGGGGATAGCACCGAGGATGGCACCTGTGATGCGGTGTCTTAACCTAACTTTCTGCCAACATAAACCCTGCACCAACAGACCCTTACCCTAACGCACCAGAGTAAGAGTCTGGGCGTAACAATAGGTTTCCAGCAACAACACCACCAACCTATGAG;CE=1.97255	GT:GL:GQ:FT:RCL:RC:RCR:CN:DR:DV:RR:RV	1/1:-29.8966,-2.70587,0:27:PASS:553:8:749:0:0:0:0:9	0/0:0,-8.12356,-94.3957:81:PASS:6884:3500:0:1:0:0:27:0	1/1:-131.393,-11.1312,0:111:PASS:4426:19:2391:0:0:0:0:37	0/0:0,-8.12395,-95.5961:81:PASS:5599:13078:6791:2:0:0:27:0	unitig_0	4937422	198	N	<DEL>	.	.	SVTYPE=DEL;STRANDS=+-:27;SVLEN=-186;END=4937608;CIPOS=-2,0;CIEND=-10,9;CIPOS95=0,0;CIEND95=0,0;SU=27;PE=1;SR=26	GT:SU:PE:SR	./.:4:0:4	./.:0:0:0	./.:23:1:22	./.:0:0:0
unitig_0	4975154	4976853	-	-	DEL	-	1699	0	0	0	0	0			unitig_0	4975154	4976853	-	-	PM448_GAP	-	unitig_0	4975150	DEL00000487	T	<DEL>	.	PASS	PRECISE;SVTYPE=DEL;SVMETHOD=EMBL.DELLYv0.7.7;CHR2=unitig_0;END=4976854;PE=21;MAPQ=60;CT=3to5;CIPOS=-6,6;CIEND=-6,6;INSLEN=0;HOMLEN=6;SR=10;SRQ=0.994012;CONSENSUS=TCCAAATGGTACTAAGCAGGGCAGTCGTCCTCAAAAGACTCGGGAAGTCGACCTCTCAGTCGAGAAATCAACTCCCAAGACTGGCTAAGATTTCTGATAGTCTGGTCGAATCAGTCGTGCAAACTCAGCCTCGGGATTTAGAAATCCGTAAAGAGAAAATATCATGT;CE=1.98344	GT:GL:GQ:FT:RCL:RC:RCR:CN:DR:DV:RR:RV	0/0:0,-2.40662,-27.6984:24:PASS:157:271:143:2:37:0:8:0	./.:0,0,0:0:LowQual:4:2:2:1:0:0:0:0	1/1:-61.598,-5.11549,0:51:PASS:277:0:170:0:0:21:0:17	0/0:0,-23.1706,-281.091:10000:PASS:442:956:535:2:123:0:77:0	unitig_0	4975153	201	N	<DEL>	.	.	SVTYPE=DEL;STRANDS=+-:39;SVLEN=-1700;END=4976853;CIPOS=-10,9;CIEND=-3,1;CIPOS95=0,0;CIEND95=0,0;SU=39;PE=22;SR=17	GT:SU:PE:SR	./.:0:0:0	./.:0:0:0	./.:39:22:17	./.:0:0:0
unitig_0	4979759	4980727	-	-	DEL	-	968	0	1	0	1	0	TM1119_g1555		unitig_0	4979759	4980727	-	-	PM448_GAP	-	unitig_0	4979754	DEL00000489	G	<DEL>	.	PASS	PRECISE;SVTYPE=DEL;SVMETHOD=EMBL.DELLYv0.7.7;CHR2=unitig_0;END=4980728;PE=48;MAPQ=60;CT=3to5;CIPOS=-7,7;CIEND=-7,7;INSLEN=0;HOMLEN=6;SR=10;SRQ=0.993827;CONSENSUS=TTGGTGGTGTTGTCGCTGAGACACAGGAAAAAATCACACCTTTTGCCTGCGACAACCCCGTCTTGCTCGAGAAGTACCTAATTAATTAATTGACCGTCGAGGCTATTGAGTCTATTGTTGAGGGCACGCTCGAGTACCGAGTACCGAGTACCGAGCCAATCT;CE=1.99945	GT:GL:GQ:FT:RCL:RC:RCR:CN:DR:DV:RR:RV	0/0:0,-1.8057,-22.6995:18:PASS:64:164:67:3:25:0:6:0	0/0:0,-17.1473,-200.189:10000:PASS:362:533:88:2:39:0:57:0	1/1:-75.1946,-6.6173,0:66:PASS:289:2:176:0:0:47:0:22	0/0:0,-15.3462,-186.594:154:PASS:254:478:227:2:105:0:51:0	unitig_0	4979758	121	N	<DEL>	.	.	SVTYPE=DEL;STRANDS=+-:70;SVLEN=-969;END=4980727;CIPOS=-1,0;CIEND=-2,0;CIPOS95=0,0;CIEND95=0,0;SU=70;PE=51;SR=19	GT:SU:PE:SR	./.:0:0:0	./.:0:0:0	./.:70:51:19	./.:0:0:0
unitig_0	4985560	4987124	-	-	-	DEL	1564	0	0	0	0	0			unitig_0	4985560	4987124	-	-	-	PM449_GAP	unitig_0	4985558	DEL00000492	A	<DEL>	.	PASS	PRECISE;SVTYPE=DEL;SVMETHOD=EMBL.DELLYv0.7.7;CHR2=unitig_0;END=4987125;PE=32;MAPQ=60;CT=3to5;CIPOS=-2,2;CIEND=-2,2;INSLEN=0;HOMLEN=2;SR=10;SRQ=1;CONSENSUS=AGCAGAGCTCTCTCTCTCGACGGGTGCAAAGCCCTGATACGCACCGGTGTATACGAACTGGGCGAAACGCAAGAAAATATCGACATGTACCTTGTAGATGCTGAAGAGAGAATCCCTACGGACGGAAACCTCGGCTTTCTCTTCTGGTTGAAGAGCAAGCTCTCCGTCCGGT;CE=1.99516	GT:GL:GQ:FT:RCL:RC:RCR:CN:DR:DV:RR:RV	0/0:0,-4.51334,-54.0979:45:PASS:182:275:85:2:37:0:15:0	0/0:0,-8.42398,-98.2951:84:PASS:156:491:248:2:35:0:28:0	0/0:0,-12.9384,-153.494:129:PASS:282:667:448:2:38:0:43:0	1/1:-213.793,-17.7536,0:10000:PASS:313:0:359:0:0:32:0:59	unitig_0	4985559	202	N	<DEL>	.	.	SVTYPE=DEL;STRANDS=+-:81;SVLEN=-1565;END=4987124;CIPOS=0,0;CIEND=0,0;CIPOS95=0,0;CIEND95=0,0;SU=81;PE=38;SR=43	GT:SU:PE:SR	./.:0:0:0	./.:0:0:0	./.:0:0:0	./.:81:38:43
unitig_0	5004012	5004609	DEL	-	-	-	597	0	0	0	0	0			unitig_0	5004012	5004609	PA7_GAP	-	-	-	unitig_0	5004008	DEL00000499	C	<DEL>	.	PASS	PRECISE;SVTYPE=DEL;SVMETHOD=EMBL.DELLYv0.7.7;CHR2=unitig_0;END=5004608;PE=34;MAPQ=60;CT=3to5;CIPOS=-6,6;CIEND=-6,6;INSLEN=0;HOMLEN=7;SR=9;SRQ=0.968944;CONSENSUS=AGTCGGGGACCTAGGGATCCTATGTTCATGTTAAATTAGAATGACTAAGCATCCAAGGATAGTGTCTACATCGCCTTGACGGCAGCCAGACATCCCACTAGCTTTGAATACGTCACCAAACTCGACATCATCTCTCAACCCCAGAATTTGCCGGCCAGGTT;CE=1.98965	GT:GL:GQ:FT:RCL:RC:RCR:CN:DR:DV:RR:RV	1/1:-26.0992,-2.10645,0:21:PASS:55:0:51:0:0:34:0:7	0/0:0,-3.30999,-39.6987:33:PASS:45:78:0:3:0:0:11:0	0/0:0,-4.51345,-53.298:45:PASS:31:35:56:1:11:0:15:0	0/0:0,-10.2309,-122.196:102:PASS:191:376:106:3:0:0:34:0	unitig_0	5004010	207	N	<DEL>	.	.	SVTYPE=DEL;STRANDS=+-:36;SVLEN=-597;END=5004607;CIPOS=-7,9;CIEND=-7,6;CIPOS95=0,2;CIEND95=-1,1;IMPRECISE;SU=36;PE=34;SR=2	GT:SU:PE:SR	./.:36:34:2	./.:0:0:0	./.:0:0:0	./.:0:0:0
unitig_0	5066428	5070205	DEL	-	-	-	3777	1	1	0	2	1	TM1119_g1577;TM1119_g1579	TM1119_g1578	unitig_0	5066428	5070205	PA7_GAP	-	-	-	unitig_0	5066426	DEL00000521	C	<DEL>	.	PASS	PRECISE;SVTYPE=DEL;SVMETHOD=EMBL.DELLYv0.7.7;CHR2=unitig_0;END=5070206;PE=45;MAPQ=60;CT=3to5;CIPOS=-3,3;CIEND=-3,3;INSLEN=0;HOMLEN=4;SR=10;SRQ=0.981651;CONSENSUS=TACTACCGCTATCACCCTTGAACTCGACGACGAAGAACGGATATAGCACCTCAGACCCCACGGACGGTTCCGGCTCGACCAAGACCAGGACCACTTCGACGACGTCATC;CE=1.93455	GT:GL:GQ:FT:RCL:RC:RCR:CN:DR:DV:RR:RV	1/1:-53.9958,-4.8123,0:48:PASS:135:3:417:0:0:44:0:16	0/0:0,-9.32723,-108.995:93:PASS:57:1409:594:4:32:0:31:0	0/0:0,-0.300685,-3.09965:5:LowQual:1115:655:100:1:1:0:1:0	0/0:0,-7.8229,-93.6961:78:PASS:672:334:182:1:1:0:26:0	unitig_0	5066422	234	N	<DEL>	.	.	SVTYPE=DEL;STRANDS=+-:50;SVLEN=-3783;END=5070205;CIPOS=-4,8;CIEND=-6,1;CIPOS95=0,1;CIEND95=0,0;IMPRECISE;SU=50;PE=45;SR=5	GT:SU:PE:SR	./.:50:45:5	./.:0:0:0	./.:0:0:0	./.:0:0:0
unitig_0	5067966	5071853	-	-	DEL	-	3887	0	0	0	0	2		TM1119_g1578;TM1119_g1579	unitig_0	5067966	5071853	-	-	PM448_GAP	-	unitig_0	5067924	DEL00000522	C	<DEL>	.	PASS	PRECISE;SVTYPE=DEL;SVMETHOD=EMBL.DELLYv0.7.7;CHR2=unitig_0;END=5071868;PE=55;MAPQ=33;CT=3to5;CIPOS=-23,23;CIEND=-23,23;INSLEN=0;HOMLEN=24;SR=10;SRQ=0.95;CONSENSUS=GATGTGATCGAACGGCTTTAACCGCAATAGGCCTTCGCACATAAGGCTCCTACCACTGTAGCTACAAGGCTCCTACCACTGTAGCTGCAGGGCTCCTACCACTGTAGCTACAAGGCTCCTACCACTGTAGCTGCAGGGCTCCTACCACTGTAGCTACAAG;CE=1.98146	GT:GL:GQ:FT:RCL:RC:RCR:CN:DR:DV:RR:RV	0/1:-49.0799,0,-4.43661:44:PASS:103:352:340:2:0:0:3:17	0/0:0,-1.80539,-21.2992:18:PASS:427:1561:1065:2:0:0:6:0	1/1:-248.048,-23.1283,0:10000:PASS:797:10:1370:0:0:53:0:78	1/1:-175.689,-16.0468,0:10000:PASS:536:15:924:0:0:0:0:56	unitig_0	5067955	235	N	<DEL>	.	.	SVTYPE=DEL;STRANDS=+-:54;SVLEN=-3912;END=5071867;CIPOS=-10,9;CIEND=-10,8;CIPOS95=0,0;CIEND95=0,0;SU=54;PE=25;SR=29	GT:SU:PE:SR	./.:0:0:0	./.:0:0:0	./.:54:25:29	./.:0:0:0
unitig_0	5150778	5160323	-	-	DEL	-	9545	0	0	0	0	1		TM1119_g1596	unitig_0	5150778	5160323	-	-	PM448_GAP		unitig_0	5150678	DEL00000554	A	<DEL>	.	PASS	IMPRECISE;SVTYPE=DEL;SVMETHOD=EMBL.DELLYv0.7.7;CHR2=unitig_0;END=5160324;PE=60;MAPQ=53;CT=3to5;CIPOS=-99,99;CIEND=-99,99	GT:GL:GQ:FT:RCL:RC:RCR:CN:DR:DV:RR:RV	./.:0,0,0:0:LowQual:0:31:3:21:0:0:0:0	./.:0,0,0:0:LowQual:10:17:6:2:0:0:0:0	1/1:-293.966,-17.6266,0:10000:PASS:1984:92:328:0:0:59:0:0	1/1:-79.0293,-8.96021,0:90:PASS:2195:2013:66:2:0:30:0:0	unitig_0	5150777	254	N	<DEL>	.	.	SVTYPE=DEL;STRANDS=+-:228;SVLEN=-9546;END=5160323;CIPOS=0,0;CIEND=0,0;CIPOS95=0,0;CIEND95=0,0;SU=228;PE=84;SR=144	GT:SU:PE:SR	./.:0:0:0	./.:0:0:0	./.:152:63:89	./.:75:21:54
unitig_0	5175716	5176442	-	-	DEL	-	726	1	0	0	1	1	TM1119_g1602	TM1119_g1601	unitig_0	5175716	5176442	-	-	PM448_GAP	-	unitig_0	5175714	DEL00000558	G	<DEL>	.	PASS	PRECISE;SVTYPE=DEL;SVMETHOD=EMBL.DELLYv0.7.7;CHR2=unitig_0;END=5176443;PE=28;MAPQ=60;CT=3to5;CIPOS=-3,3;CIEND=-3,3;INSLEN=0;HOMLEN=2;SR=10;SRQ=0.994118;CONSENSUS=AATCAACCATCAATACTAACACAACACTTTGTCTTGCCCACTTTATCAACGACGTCGGCCTGATCGACCGACCGGCTATGGAGGAGCGACGCTGGGGATATCAAAGAGGAGAAAATAGGATCATTTGAGTCTACATTGCTGAAGGGATGGTTGCAACACGCTCGTCTTGA;CE=1.99257	GT:GL:GQ:FT:RCL:RC:RCR:CN:DR:DV:RR:RV	./.:0,0,0:0:LowQual:0:0:0:-1:0:0:0:0	0/0:0,-8.12363,-95.3958:81:PASS:105:162:53:2:36:0:27:0	1/1:-132.496,-8.63468,0:86:PASS:123:1:61:0:0:28:1:37	0/0:0,-19.5592,-234.892:10000:PASS:184:339:195:2:91:0:65:0	unitig_0	5175715	257	N	<DEL>	.	.	SVTYPE=DEL;STRANDS=+-:50;SVLEN=-727;END=5176442;CIPOS=-1,0;CIEND=-10,9;CIPOS95=0,0;CIEND95=0,0;SU=50;PE=29;SR=21	GT:SU:PE:SR	./.:0:0:0	./.:0:0:0	./.:50:29:21	./.:0:0:0
unitig_0	5330730	5331622	-	DEL	-	-	892	1	0	0	1	0	TM1119_g1607		unitig_0	5330730	5331622	-	PM1118_GAP	-	-	unitig_0	5330729	DEL00000609	T	<DEL>	.	PASS	PRECISE;SVTYPE=DEL;SVMETHOD=EMBL.DELLYv0.7.7;CHR2=unitig_0;END=5331623;PE=47;MAPQ=60;CT=3to5;CIPOS=-4,4;CIEND=-4,4;INSLEN=0;HOMLEN=3;SR=10;SRQ=1;CONSENSUS=GGGGTGAGACCATCGGGTTGACGTCTAATTCATTGAGACAGCCAAGGCGACAACGTAGGGAATACCAGGCAACAAGATTAGAGAGGTAGACGAAGAATGATGATGGTCAAGCTTGTGTCCTCAAGATCGCCCGGTTTCCGTTCGAGATGCCCGCGCTCCAACGAGAATTGAGAGCTTATTA;CE=1.98136	GT:GL:GQ:FT:RCL:RC:RCR:CN:DR:DV:RR:RV	0/0:0,-1.80576,-22.8996:18:PASS:90:30:0:1:0:0:6:0	1/1:-116.995,-6.73135,0:67:PASS:138:2:89:0:0:47:1:34	./.:0,0,0:0:LowQual:199:0:0:0:0:0:0:0	./.:0,0,0:0:LowQual:164:0:0:0:0:0:0:0	unitig_0	5330729	353	N	<DEL>	.	.	SVTYPE=DEL;STRANDS=+-:64;SVLEN=-893;END=5331622;CIPOS=-2,0;CIEND=-10,9;CIPOS95=0,0;CIEND95=0,0;SU=64;PE=47;SR=17	GT:SU:PE:SR	./.:0:0:0	./.:64:47:17	./.:0:0:0	./.:0:0:0
unitig_0	5333217	5333506	-	DEL	-	-	289	0	0	0	0	0			unitig_0	5333217	5333506	-	PM1118_GAP	-	-	unitig_0	5333216	DEL00000611	C	<DEL>	.	PASS	PRECISE;SVTYPE=DEL;SVMETHOD=EMBL.DELLYv0.7.7;CHR2=unitig_0;END=5333507;PE=10;MAPQ=60;CT=3to5;CIPOS=-2,2;CIEND=-2,2;INSLEN=0;HOMLEN=2;SR=10;SRQ=1;CONSENSUS=GGCGTCACGTTAGCCCGATCTCCTACGGTAACGAAGTGTGACGGAGAATTTGGGGATCTGTCACTCTGCTCCGTTTCGTGATGCCTCTGCACTCCGATGTTCTGCGCCGTGGGGATCGGCGAGATCATTTTCCATTCTTGATTTAGACAATGTGGAGGGCACCTTGTTTC;CE=1.9698	GT:GL:GQ:FT:RCL:RC:RCR:CN:DR:DV:RR:RV	./.:0,0,0:0:LowQual:0:3327:2275:3:0:0:0:0	1/1:-126.097,-7.1337,0:71:PASS:4042:109:3751:0:2:10:1:35	0/0:0,-10.2302,-122.195:102:PASS:4717:16905:6063:3:55:1:34:0	./.:0,0,0:0:LowQual:10628:23242:11268:2:90:0:0:0	unitig_0	5333216	354	N	<DEL>	.	.	SVTYPE=DEL;STRANDS=+-:22;SVLEN=-290;END=5333506;CIPOS=-10,9;CIEND=-10,9;CIPOS95=0,0;CIEND95=0,0;SU=22;PE=0;SR=22	GT:SU:PE:SR	./.:0:0:0	./.:22:0:22	./.:0:0:0	./.:0:0:0
unitig_0	5477769	5477978	-	DEL	-	-	209	0	0	1	1	0	TM1119_g1636		unitig_0	5477769	5477978	-	PM1118_GAP	-	-	unitig_0	5477768	DEL00000644	GTTGTAGGGTCCCAGAGTAGATTATCAAAAGCTTTGTCCCGATGTTTGGTAAGTAGGTGCTCCATTTGGGGGCCAGGGGATTATCAAGGTGACGAGCAGGCCACACCCTCGGTTGACGAAGGTGAGACGAGGGAGATAGACTCACTGAAATCTGCGTATATTATAACCCTGTCTTGCTTCGACGACAAGCTTACGAACTGCGCCGATAGAC	G	.	PASS	PRECISE;SVTYPE=DEL;SVMETHOD=EMBL.DELLYv0.7.7;CHR2=unitig_0;END=5477979;PE=0;MAPQ=60;CT=3to5;CIPOS=-2,2;CIEND=-2,2;INSLEN=0;HOMLEN=1;SR=10;SRQ=0.95977;CONSENSUS=GTGGGTGGTAAAGGAGCGGAAGAACTCGTACGCAGGGTGTAGGATACTGCTGAAGTCGTAATCGAGGAGTGCGGTGATGCTGCCCGCATGCTCAATAAACTTGTCGACACGCTCTCTAACGCCGTTGGCGTGCCAGCCCCGTATGTACGCGTTGTTGTCGGCCTTGGTGAGGGC;CE=1.96512	GT:GL:GQ:FT:RCL:RC:RCR:CN:DR:DV:RR:RV	./.:0,0,0:0:LowQual:0:0:0:-1:0:0:0:0	1/1:-319.687,-26.7789,0:10000:PASS:7556:2:10703:0:0:0:0:89	0/0:0,-14.4431,-172.794:144:PASS:12364:23036:13114:2:0:0:48:0	0/0:0,-11.4339,-135.995:114:PASS:9463:15444:7299:2:0:0:38:0	unitig_0	5477768	409	N	<DEL>	.	.	SVTYPE=DEL;STRANDS=+-:63;SVLEN=-214;END=5477982;CIPOS=0,0;CIEND=0,0;CIPOS95=0,0;CIEND95=0,0;SU=63;PE=1;SR=62	GT:SU:PE:SR	./.:0:0:0	./.:62:1:61	./.:0:0:0	./.:0:0:0
unitig_0	5484618	5484800	-	-	DEL	-	182	0	0	1	1	0	TM1119_g1640		unitig_0	5484618	5484800	-	-	PM448_GAP	-	unitig_0	5484614	DEL00000648	CCCAAGTGCCATTGTCTCTGGACCAGAACCTGCTCCTTTCCATTTCCGTCCTCCTCTTCCTTCATCTCTTTCCCTACTCGGAACAGACCCCAAACCTGGAGTCGGATCCATCTCCAGACCGCTACCCTCTTCCGCCTTCGTGCCTGGCTCCCTTTCTGCCTCCCATTCCAGTTCATCCATTGCAGAT	C	.	PASS	PRECISE;SVTYPE=DEL;SVMETHOD=EMBL.DELLYv0.7.7;CHR2=unitig_0;END=5484801;PE=0;MAPQ=60;CT=3to5;CIPOS=-5,5;CIEND=-5,5;INSLEN=0;HOMLEN=4;SR=10;SRQ=0.968553;CONSENSUS=GGCCTTTGGCACGGGCACGGGCACGGGAACCAAGATGAAAATCCATTGCAGCCACCGCCTTCATTGAGCCCAGGCCCCATCGCCGAAACCGACCCTTGCCAGACCCAGGCTCTCTGGGCCAACGTCGCCAGGCATCCCCATAACCGGCCGACCGTCGT;CE=1.90811	GT:GL:GQ:FT:RCL:RC:RCR:CN:DR:DV:RR:RV	0/0:0,-2.10632,-25.0991:21:PASS:761:2846:1343:3:0:0:7:0	0/1:-2.69808,0,-2.89816:25:PASS:93:49:279:0:0:0:1:1	1/1:-247.988,-21.3611,0:10000:PASS:5154:154:7603:0:0:0:0:71	0/0:0,-16.5472,-196.59:10000:PASS:5165:13067:6678:2:0:0:55:0	unitig_0	5484617	414	N	<DEL>	.	.	SVTYPE=DEL;STRANDS=+-:57;SVLEN=-183;END=5484800;CIPOS=0,0;CIEND=0,0;CIPOS95=0,0;CIEND95=0,0;SU=57;PE=1;SR=56	GT:SU:PE:SR	./.:0:0:0	./.:0:0:0	./.:57:1:56	./.:0:0:0
unitig_0	5498357	5500086	DEL	-	-	-	1729	0	0	1	1	0	TM1119_g1645 almost all		unitig_0	5498357	5500086	PA7_GAP	-	-	-	unitig_0	5498355	DEL00000650	G	<DEL>	.	PASS	PRECISE;SVTYPE=DEL;SVMETHOD=EMBL.DELLYv0.7.7;CHR2=unitig_0;END=5500086;PE=36;MAPQ=60;CT=3to5;CIPOS=-3,3;CIEND=-3,3;INSLEN=0;HOMLEN=2;SR=10;SRQ=0.985714;CONSENSUS=TCAGTCATGCTTGCCCGAGACGGCTTAAGCTTGCTAGGCCGGAGGAACGCGATGACATCTTTGCGTATCCGGAGAGCGCAGGTCCCGGATGTTGGCCACGGTGAGCTGGTTGCGCGCGATAGAGTCCATTGTATTTTTGT;CE=1.96669	GT:GL:GQ:FT:RCL:RC:RCR:CN:DR:DV:RR:RV	1/1:-42.4979,-3.61022,0:36:PASS:133:0:164:0:0:36:0:12	./.:0,0,0:0:LowQual:2:4:1:3:0:0:0:0	./.:0,0,0:0:LowQual:0:0:132:0:0:0:0:0	0/0:0,-16.2486,-195.193:10000:PASS:474:890:390:2:98:0:54:0	unitig_0	5498356	421	N	<DEL>	.	.	SVTYPE=DEL;STRANDS=+-:40;SVLEN=-1730;END=5500086;CIPOS=-5,7;CIEND=-10,9;CIPOS95=0,0;CIEND95=0,0;SU=40;PE=36;SR=4	GT:SU:PE:SR	./.:40:36:4	./.:0:0:0	./.:0:0:0	./.:0:0:0
unitig_0	5514791	5515044	-	DEL	-	-	253	0	0	1	1	0	TM1119_g1650		unitig_0	5514791	5515044	-	PM1118_GAP	-	-	unitig_0	5514790	DEL00000655	GCCTCCTCAGCGGCTCCTACAACGCCAGCCTCAACTCCCGTCTCAACGCCCACAGCCTCTAGTGCCCAGCGTTCGCGATGCCCAAATCGACCCGTCTGTGGCAATTACGGCCTCTCCTTCTGCGAATCGTGTGATTGCCATGGCGAGGGAGGCGATGATGTCCGCTAGAGCGGATGAAGCTCGGGCTACTAGTGCAAGCGGGATCGGGGACAGACTAACGCCAGGTATTACAATTGACCTGAGCAGAAAAAATAT	G	.	PASS	PRECISE;SVTYPE=DEL;SVMETHOD=EMBL.DELLYv0.7.7;CHR2=unitig_0;END=5515045;PE=0;MAPQ=60;CT=3to5;CIPOS=-1,1;CIEND=-1,1;INSLEN=0;HOMLEN=0;SR=10;SRQ=0.98895;CONSENSUS=AACAGGAAGGAAGATCCATGCCTTCCACAGCGCAAGGACTACCTGAGACTCGGCGAGCTGTACCGGCTATCACAATCCCCCCACGGATCCAGTTTACCAGATGAGGTCATTGACATCATCAAGAACGGACTTGAACGGTTGCGTCATCCTCCTTATTGTTGGTAACCTTCGGCTAACATGT;CE=1.99326	GT:GL:GQ:FT:RCL:RC:RCR:CN:DR:DV:RR:RV	0/0:0,-3.30944,-39.7981:33:PASS:2018:3559:1997:2:0:0:11:0	1/1:-78.1955,-4.22099,0:42:PASS:2054:67:2629:0:0:0:1:24	./.:0,0,0:0:LowQual:0:0:0:-1:0:0:0:0	0/0:0,-17.1485,-200.39:10000:PASS:8369:18153:10557:2:0:0:57:0	unitig_0	5514790	424	N	<DEL>	.	.	SVTYPE=DEL;STRANDS=+-:14;SVLEN=-254;END=5515044;CIPOS=-10,9;CIEND=-10,9;CIPOS95=0,0;CIEND95=0,0;SU=14;PE=0;SR=14	GT:SU:PE:SR	./.:0:0:0	./.:14:0:14	./.:0:0:0	./.:0:0:0
unitig_0	5517840	5520074	-	-	DEL	-	2234	0	1	0	1	0	TM1119_g1650		unitig_0	5517840	5520074	-	-	PM448_GAP	-	unitig_0	5517837	DEL00000656	G	<DEL>	.	PASS	IMPRECISE;SVTYPE=DEL;SVMETHOD=EMBL.DELLYv0.7.7;CHR2=unitig_0;END=5520075;PE=76;MAPQ=60;CT=3to5;CIPOS=-50,50;CIEND=-50,50	GT:GL:GQ:FT:RCL:RC:RCR:CN:DR:DV:RR:RV	1/1:-243.399,-13.5454,0:135:PASS:242:0:230:0:0:45:0:0	0/0:0,-13.8466,-266.499:138:PASS:266:587:390:2:46:0:0:0	1/1:-452.4,-22.8778,0:10000:PASS:153:1:479:0:0:76:0:0	0/0:0,-10.235,-201.6:102:PASS:502:1179:614:2:34:0:0:0	unitig_0	5517833	427	N	<DEL>	.	.	SVTYPE=DEL;STRANDS=+-:148;SVLEN=-2238;END=5520071;CIPOS=0,3;CIEND=-2,0;CIPOS95=0,0;CIEND95=0,1;IMPRECISE;SU=148;PE=121;SR=27	GT:SU:PE:SR	./.:51:45:6	./.:0:0:0	./.:97:76:21	./.:0:0:0
unitig_0	5544615	5546118	-	-	-	DEL	1503	0	0	0	0	0			unitig_0	5544615	5546118	-	-	-	PM449_GAP	unitig_0	5544614	DEL00000670	C	<DEL>	.	PASS	PRECISE;SVTYPE=DEL;SVMETHOD=EMBL.DELLYv0.7.7;CHR2=unitig_0;END=5546119;PE=49;MAPQ=60;CT=3to5;CIPOS=-1,1;CIEND=-1,1;INSLEN=0;HOMLEN=0;SR=10;SRQ=0.981481;CONSENSUS=CTCTGTGTCCATTGGGAGTCCTCCAGTGCTCAGTGCTGCGACATAGCTCTTGGCCTTCTCCTTGATGTCATGGTGCCTCAAAGGGACACTCTTTGGCAATGACGATCCTGGTCAAGTGCTTCAAGTGTTCAAGAGGACAGAGAAGAAAATCAGCGCACATCA;CE=1.999	GT:GL:GQ:FT:RCL:RC:RCR:CN:DR:DV:RR:RV	0/0:0,-2.40665,-27.7984:24:PASS:0:4:128:0:0:0:8:0	./.:0,0,0:0:LowQual:6:2:197:0:0:0:0:0	0/0:0,-5.71673,-66.5972:57:PASS:1:0:311:0:0:0:19:0	1/1:-264.292,-21.6662,0:10000:PASS:99:0:415:0:0:49:0:72	unitig_0	5544614	443	N	<DEL>	.	.	SVTYPE=DEL;STRANDS=+-:103;SVLEN=-1504;END=5546118;CIPOS=0,0;CIEND=0,0;CIPOS95=0,0;CIEND95=0,0;SU=103;PE=52;SR=51	GT:SU:PE:SR	./.:0:0:0	./.:0:0:0	./.:0:0:0	./.:103:52:51
unitig_0	5546599	5546692	DEL	-	DEL	-	93	0	0	1	1	0	TM1119_g1654		unitig_0	5546599	5546692	PA7_GAP	-	PM448_GAP	-	unitig_0	5546598	DEL00000671	ATGGGTACCGACCTGCTGCAGCGACATCTCGGTGAGTTTGTCAAAGCTCTGGATGGCCTCGCTGTCGCAGCGTTGGCGAAGGTCCTCGATATG	A	.	PASS	PRECISE;SVTYPE=DEL;SVMETHOD=EMBL.DELLYv0.7.7;CHR2=unitig_0;END=5546691;PE=0;MAPQ=60;CT=3to5;CIPOS=-5,5;CIEND=-5,5;INSLEN=0;HOMLEN=6;SR=10;SRQ=0.983051;CONSENSUS=GGTGATGACTCTGCCAGGGATGGCAAGATGGTCGGTGTGCTGAAGGGTTCCGGCTTGCTTTGCGCATCTCGCTGATCTCCTTGCCGACAAATGGCCAATTCTCGGCTGATCCACCAAT;CE=1.97651	GT:GL:GQ:FT:RCL:RC:RCR:CN:DR:DV:RR:RV	1/1:-57.2951,-5.11265,0:51:PASS:751:59:695:0:0:0:0:17	0/0:0,-13.2389,-155.194:132:PASS:2661:5406:1816:2:0:0:44:0	1/1:-239.889,-20.4593,0:10000:PASS:2462:37:2479:0:0:0:0:68	0/0:0,-16.5492,-195.993:10000:PASS:2981:6332:3515:2:0:0:55:0	unitig_0	5546598	445	N	<DEL>	.	.	SVTYPE=DEL;STRANDS=+-:57;SVLEN=-94;END=5546692;CIPOS=0,0;CIEND=0,0;CIPOS95=0,0;CIEND95=0,0;SU=57;PE=0;SR=57	GT:SU:PE:SR	./.:5:0:5	./.:0:0:0	./.:52:0:52	./.:0:0:0
unitig_0	5547192	5547279	DEL	-	DEL	-	87	0	0	1	1	0	TM1119_g1654		unitig_0	5547192	5547279	PA7_GAP	-	PM448_GAP	-	unitig_0	5547190	DEL00000672	GTCATCTCGTGGTATGCGAGCCACCTCGAAAAGACATCTTTGCAGTACTGTGACATGACCCTCGAGCAGAATGGTGGCAAAAAGCCGATA	G	.	PASS	PRECISE;SVTYPE=DEL;SVMETHOD=EMBL.DELLYv0.7.7;CHR2=unitig_0;END=5547280;PE=0;MAPQ=60;CT=3to5;CIPOS=-3,3;CIEND=-3,3;INSLEN=0;HOMLEN=4;SR=10;SRQ=0.959016;CONSENSUS=GCTCAGACAATCAACAAACCAGACGCAGTATGAAAGGAGAGCTGAGCAAAATGTGAGAATGTTCGTGGCGACAATCCATGGTAGAGCGAACGAGTGCAATCGATTTTCGTCCCTACATGTTT;CE=1.97365	GT:GL:GQ:FT:RCL:RC:RCR:CN:DR:DV:RR:RV	1/1:-71.9967,-6.01729,0:60:PASS:949:22:326:0:0:0:0:20	0/0:0,-8.72587,-102.996:87:PASS:1434:3447:1809:2:0:0:29:0	1/1:-209.593,-17.4525,0:10000:PASS:2657:82:1026:0:0:0:0:58	0/0:0,-7.82338,-92.9966:78:PASS:3397:7015:3816:2:0:0:26:0	unitig_0	5547191	446	N	<DEL>	.	.	SVTYPE=DEL;STRANDS=+-:51;SVLEN=-88;END=5547279;CIPOS=0,0;CIEND=0,0;CIPOS95=0,0;CIEND95=0,0;SU=51;PE=0;SR=51	GT:SU:PE:SR	./.:6:0:6	./.:0:0:0	./.:45:0:45	./.:0:0:0
unitig_0	5569541	5591663	DEL	-	DEL	DEL	22122	0	1	0	1	5	TM1119_g1666	TM1119_g1667;TM1119_g1668;TM1119_g1669;TM1119_g1670;TM1119_g1671	unitig_0	5569541	5591663	PA7_GAP	-	PM448_GAP	PM449_GAP	unitig_0	5569535	DEL00000677	A	<DEL>	.	PASS	PRECISE;SVTYPE=DEL;SVMETHOD=EMBL.DELLYv0.7.7;CHR2=unitig_0;END=5591664;PE=43;MAPQ=60;CT=3to5;CIPOS=-6,6;CIEND=-6,6;INSLEN=0;HOMLEN=5;SR=10;SRQ=0.992308;CONSENSUS=ACTGCTGTTACCAAAGGCAGCTCTTTGTTGACCTTCTTGATGCTACGTATCGGTGATACAACCTCTCGGCCACTACCATCATGACTCTCATACCCCTCGCAAGATGGTTACCTCCAACATACCTTTTTGG;CE=1.96085	GT:GL:GQ:FT:RCL:RC:RCR:CN:DR:DV:RR:RV	1/1:-35.8987,-3.00898,0:30:PASS:1848:0:1969:0:0:41:0:10	0/0:0,-2.70838,-33.1991:27:PASS:4239:5599:889:2:27:0:9:0	1/1:-54.4982,-1.61554,0:16:PASS:5457:14:1159:0:0:27:1:16	1/1:-227.592,-18.9571,0:10000:PASS:5177:17:1264:0:0:77:0:63	unitig_0	5569540	448	N	<DEL>	.	.	SVTYPE=DEL;STRANDS=+-:214;SVLEN=-22123;END=5591663;CIPOS=0,0;CIEND=0,0;CIPOS95=0,0;CIEND95=0,0;SU=214;PE=149;SR=65	GT:SU:PE:SR	./.:51:43:8	./.:0:0:0	./.:40:29:11	./.:123:77:46
unitig_0	5612082	5612341	DEL	-	-	-	259	0	0	1	1	0	TM1119_g1678		unitig_0	5612082	5612341	PA7_GAP	PM1118_GAP	-	-	unitig_0	5612037	DEL00000680	G	<DEL>	.	PASS	IMPRECISE;SVTYPE=DEL;SVMETHOD=EMBL.DELLYv0.7.7;CHR2=unitig_0;END=5612342;PE=27;MAPQ=60;CT=3to5;CIPOS=-52,52;CIEND=-52,52	GT:GL:GQ:FT:RCL:RC:RCR:CN:DR:DV:RR:RV	1/1:-232.699,-6.9436,0:69:PASS:2884:476:2596:0:1:42:0:0	0/1:-4.49485,0,-21.9949:45:PASS:3890:994:4253:0:4:1:0:0	1/1:-162,-8.1278,0:81:PASS:4848:291:4651:0:0:27:0:0	0/1:-200.76,0,-5.65986:57:PASS:12355:2508:9533:0:3:36:0:0	unitig_0	5612081	451	N	<DEL>	.	.	SVTYPE=DEL;STRANDS=+-:41;SVLEN=-260;END=5612341;CIPOS=0,0;CIEND=-1,2;CIPOS95=0,0;CIEND95=0,0;SU=41;PE=0;SR=41	GT:SU:PE:SR	./.:8:0:8	./.:16:0:16	./.:0:0:0	./.:17:0:17
unitig_0	5636466	5639081	DEL	-	-	-	2615	0	1	0	1	1	TM1119_g1687	TM1119_g1688	unitig_0	5636466	5639081	PA7_GAP	-	-	-	unitig_0	5636465	DEL00000684	C	<DEL>	.	PASS	PRECISE;SVTYPE=DEL;SVMETHOD=EMBL.DELLYv0.7.7;CHR2=unitig_0;END=5639082;PE=49;MAPQ=60;CT=3to5;CIPOS=-2,2;CIEND=-2,2;INSLEN=0;HOMLEN=1;SR=10;SRQ=1;CONSENSUS=CTTTGTGTATGCTATTCTTCTCACAATGTCTTCTCCAACAGATATTGCCCCGGCTGCGGCGCTGTGGGTGTTAGTGGTCCATGAATCAACGACCGGGGTGAGAGACTAATCGCAGCAGAGCCC;CE=1.99108	GT:GL:GQ:FT:RCL:RC:RCR:CN:DR:DV:RR:RV	1/1:-65.796,-5.71559,0:57:PASS:284:0:256:0:0:49:0:19	0/0:0,-0.601882,-7.39982:7:LowQual:2:4:8:1:0:0:2:0	0/0:0,-10.5312,-126.395:105:PASS:299:750:452:2:36:0:35:0	./.:0,0,0:0:LowQual:0:0:0:-1:0:0:0:0	unitig_0	5636465	454	N	<DEL>	.	.	SVTYPE=DEL;STRANDS=+-:56;SVLEN=-2616;END=5639081;CIPOS=-3,4;CIEND=-5,2;CIPOS95=0,0;CIEND95=0,0;SU=56;PE=49;SR=7	GT:SU:PE:SR	./.:56:49:7	./.:0:0:0	./.:0:0:0	./.:0:0:0
unitig_0	5666088	5668612	DEL	-	-	-	2524	0	0	0	0	1		TM1119_g1699	unitig_0	5666088	5668612	PA7_GAP	-	-	-	unitig_0	5666064	DEL00000689	G	<DEL>	.	PASS	IMPRECISE;SVTYPE=DEL;SVMETHOD=EMBL.DELLYv0.7.7;CHR2=unitig_0;END=5668613;PE=28;MAPQ=55;CT=3to5;CIPOS=-50,50;CIEND=-50,50	GT:GL:GQ:FT:RCL:RC:RCR:CN:DR:DV:RR:RV	1/1:-141.499,-8.42813,0:84:PASS:202:0:246:0:0:28:0:0	0/0:0,-7.22423,-136.7:72:PASS:114:1522:404:6:24:0:0:0	0/0:0,-21.9744,-428.499:10000:PASS:338:1904:702:4:73:0:0:0	0/0:0,-9.63273,-189.3:96:PASS:432:1200:65:5:32:0:0:0	unitig_0	5666087	458	N	<DEL>	.	.	SVTYPE=DEL;STRANDS=+-:44;SVLEN=-2532;END=5668619;CIPOS=-4,2;CIEND=-10,2;CIPOS95=0,0;CIEND95=0,0;SU=44;PE=32;SR=12	GT:SU:PE:SR	./.:44:32:12	./.:0:0:0	./.:0:0:0	./.:0:0:0
unitig_0	5668757	5670799	-	-	-	DEL	2042	0	0	0	0	1		TM1119_g1700	unitig_0	5668757	5670799	-	-	-	PM449_GAP	unitig_0	5668757	DEL00000690	T	<DEL>	.	PASS	IMPRECISE;SVTYPE=DEL;SVMETHOD=EMBL.DELLYv0.7.7;CHR2=unitig_0;END=5670800;PE=45;MAPQ=60;CT=3to5;CIPOS=-50,50;CIEND=-50,50	GT:GL:GQ:FT:RCL:RC:RCR:CN:DR:DV:RR:RV	./.:0,0,0:0:LowQual:41:385:177:4:0:0:0:0	./.:0,0,0:0:LowQual:541:390:50:1:0:0:0:0	0/0:0,-8.72908,-164.499:87:PASS:702:978:158:2:29:0:0:0	1/1:-255.999,-13.5454,0:135:PASS:508:2:652:0:0:45:0:0	unitig_0	5668756	459	N	<DEL>	.	.	SVTYPE=DEL;STRANDS=+-:87;SVLEN=-2043;END=5670799;CIPOS=0,0;CIEND=0,0;CIPOS95=0,0;CIEND95=0,0;SU=87;PE=47;SR=40	GT:SU:PE:SR	./.:0:0:0	./.:0:0:0	./.:0:0:0	./.:87:47:40
unitig_0	5693712	5694830	-	-	-	DEL	1118	1	1	0	2	0	TM1119_g1709;TM1119_g1710		unitig_0	5693712	5694830	-	-	-	PM449_GAP	unitig_0	5693712	DEL00000702	G	<DEL>	.	PASS	IMPRECISE;SVTYPE=DEL;SVMETHOD=EMBL.DELLYv0.7.7;CHR2=unitig_0;END=5694831;PE=41;MAPQ=60;CT=3to5;CIPOS=-171,171;CIEND=-171,171	GT:GL:GQ:FT:RCL:RC:RCR:CN:DR:DV:RR:RV	0/0:0,-15.0486,-276.797:150:PASS:105:262:109:2:50:0:0:0	0/0:0,-9.63295,-192:96:PASS:135:279:268:1:32:0:0:0	0/0:0,-17.4536,-340.394:10000:PASS:312:418:325:1:58:0:0:0	1/1:-234.2,-12.3419,0:123:PASS:210:0:220:0:0:41:0:0	unitig_0	5693710	471	N	<DEL>	.	.	SVTYPE=DEL;STRANDS=+-:42;SVLEN=-1120;END=5694830;CIPOS=-10,377;CIEND=-390,9;CIPOS95=0,85;CIEND95=-109,0;IMPRECISE;SU=42;PE=42;SR=0	GT:SU:PE:SR	./.:0:0:0	./.:0:0:0	./.:0:0:0	./.:42:42:0
unitig_0	5717425	5719150	-	DEL	-	-	1725	0	0	0	0	0			unitig_0	5717425	5719150	-	PM1118_GAP	-	-	unitig_0	5717420	DEL00000706	G	<DEL>	.	PASS	IMPRECISE;SVTYPE=DEL;SVMETHOD=EMBL.DELLYv0.7.7;CHR2=unitig_0;END=5719151;PE=7;MAPQ=44;CT=3to5;CIPOS=-559,559;CIEND=-559,559	GT:GL:GQ:FT:RCL:RC:RCR:CN:DR:DV:RR:RV	./.:0,0,0:0:LowQual:0:297:167:4:0:0:0:0	1/1:-30.1994,-2.10665,0:21:PASS:284:5:381:0:0:7:0:0	./.:0,0,0:0:LowQual:0:330:446:1:0:0:0:0	0/0:0,-19.1827,-336.016:10000:PASS:131:1065:410:4:65:0:0:0	unitig_0	5717418	474	N	<DEL>	.	.	SVTYPE=DEL;STRANDS=+-:7;SVLEN=-1732;END=5719150;CIPOS=-5,501;CIEND=-507,3;CIPOS95=0,311;CIEND95=-311,0;IMPRECISE;SU=7;PE=7;SR=0	GT:SU:PE:SR	./.:0:0:0	./.:7:7:0	./.:0:0:0	./.:0:0:0
unitig_0	5723883	5724071	-	-	-	DEL	188	0	0	1	1	0	TM1119_g1715		unitig_0	5723883	5724071	-	-	-	PM449_GAP	unitig_0	5723881	DEL00000709	TCAGATTACTGGATCGACACAGGTATTTCATGCCAACCATACAGTTAAATTGTTAGTGCCTTTCTCCATACATACCGCCAATGTGGAAAATTGATGAGCTAAGAACGGGAAAGGCCTTGTGACGGCGACAATGATATTGTTGGGCTATCTGGCTTCGAATTGATTTCATATCGGCAGGCTTACGTGATGTC	T	.	PASS	PRECISE;SVTYPE=DEL;SVMETHOD=EMBL.DELLYv0.7.7;CHR2=unitig_0;END=5724072;PE=0;MAPQ=60;CT=3to5;CIPOS=-5,5;CIEND=-5,5;INSLEN=0;HOMLEN=4;SR=10;SRQ=0.96319;CONSENSUS=ATAAGAAAGTTGATGTAGTGCTAAAAGTTTCGTTGGTAAGCCGTAGCTCCTGTCATGATTGTCTCATGGCAAGACAAGTATCAGTTGGGCAAAACATTATGTCTAGGCTGATCAAACCCTCCTAGGTAGTAGCTTTGGGTTCCTGAACGACATACCAGCGTCT;CE=1.98474	GT:GL:GQ:FT:RCL:RC:RCR:CN:DR:DV:RR:RV	0/0:0,-3.91061,-46.7972:39:PASS:1904:3353:1476:2:0:0:13:0	0/0:0,-3.60986,-41.7975:36:PASS:1314:2830:1728:2:0:0:12:0	0/0:0,-2.10539,-24.2982:21:PASS:1195:1824:697:2:0:0:7:0	1/1:-233.193,-18.958,0:10000:PASS:6536:167:6313:0:0:0:0:63	unitig_0	5723884	476	N	<DEL>	.	.	SVTYPE=DEL;STRANDS=+-:40;SVLEN=-187;END=5724071;CIPOS=0,0;CIEND=0,0;CIPOS95=0,0;CIEND95=0,0;SU=40;PE=0;SR=40	GT:SU:PE:SR	./.:0:0:0	./.:0:0:0	./.:0:0:0	./.:40:0:40
unitig_0	5744374	5748322	DEL	-	DEL	DEL	3948	0	1	0	1	1	TM1119_g1721	TM1119_g1722	unitig_0	5744374	5748322	PA7_GAP	-	PM448_GAP	PM449_GAP	unitig_0	5744373	DEL00000713	A	<DEL>	.	PASS	PRECISE;SVTYPE=DEL;SVMETHOD=EMBL.DELLYv0.7.7;CHR2=unitig_0;END=5748323;PE=74;MAPQ=60;CT=3to5;CIPOS=-3,3;CIEND=-3,3;INSLEN=0;HOMLEN=2;SR=10;SRQ=0.99375;CONSENSUS=TGGATACGTACTGGGACAGAGGACATGATGACAGGTGACGCCAAGTGTATGGGCCTGAATAAGGGAGCCATCATGATCATTTCTGCCTTGCTACTGGCAACGACCGTCATTGCCGAAGGTGCATCGATCGTCGCCGCCATCGAACTCATCGAAGCCGACA;CE=1.99119	GT:GL:GQ:FT:RCL:RC:RCR:CN:DR:DV:RR:RV	1/1:-51.198,-4.2124,0:42:PASS:308:0:354:0:0:44:0:14	0/0:0,-6.8293,-110.594:68:PASS:819:872:453:1:58:2:33:1	1/1:-274.59,-22.8681,0:10000:PASS:1056:3:687:0:0:90:0:76	1/1:-206.593,-17.1519,0:10000:PASS:964:3:1024:0:0:74:0:57	unitig_0	5744373	477	N	<DEL>	.	.	SVTYPE=DEL;STRANDS=+-:318;SVLEN=-3949;END=5748322;CIPOS=0,0;CIEND=0,0;CIPOS95=0,0;CIEND95=0,0;SU=318;PE=213;SR=105	GT:SU:PE:SR	./.:50:44:6	./.:2:2:0	./.:150:91:59	./.:115:75:40
unitig_0	5768534	5769427	-	-	-	DEL	893	0	0	0	0	0			unitig_0	5768534	5769427	-	-	-	PM449_GAP	unitig_0	5768530	DEL00000715	G	<DEL>	.	PASS	IMPRECISE;SVTYPE=DEL;SVMETHOD=EMBL.DELLYv0.7.7;CHR2=unitig_0;END=5769434;PE=59;MAPQ=60;CT=3to5;CIPOS=-52,52;CIEND=-52,52	GT:GL:GQ:FT:RCL:RC:RCR:CN:DR:DV:RR:RV	0/0:0,-12.3422,-242.8:123:PASS:81:162:82:2:41:0:0:0	0/0:0,-3.61235,-72:36:PASS:68:105:42:2:12:0:0:0	./.:0,0,0:0:LowQual:100:74:0:1:0:0:0:0	1/1:-351.1,-17.7607,0:10000:PASS:236:0:300:0:0:59:0:0	unitig_0	5768529	480	N	<DEL>	.	.	SVTYPE=DEL;STRANDS=+-:101;SVLEN=-906;END=5769435;CIPOS=0,0;CIEND=0,0;CIPOS95=0,0;CIEND95=0,0;SU=101;PE=60;SR=41	GT:SU:PE:SR	./.:0:0:0	./.:0:0:0	./.:0:0:0	./.:101:60:41
unitig_0	5823550	5824134	-	DEL	-	-	584	0	0	0	0	0			unitig_0	5823550	5824134	-	PM1118_GAP	-	-	unitig_0	5823544	DEL00000721	A	<DEL>	.	PASS	PRECISE;SVTYPE=DEL;SVMETHOD=EMBL.DELLYv0.7.7;CHR2=unitig_0;END=5824135;PE=31;MAPQ=60;CT=3to5;CIPOS=-5,5;CIEND=-5,5;INSLEN=0;HOMLEN=4;SR=10;SRQ=1;CONSENSUS=AACGTAATTAAGAAAATTCAATCAGTATGACCATATACTGTAGCCATGGAGCGCTGTGTCAAGCCTCATGATTCTGTTTTGGCACATCAAACATCCTACTCGAATAACGAAGTAGTATAGTGTCACATACTCTTGAGGCTGTATCGATGTCAAAGTTGAAGATCGTGGATAGTTTCATTGAGATCTGGGCCCGTCCGGGCTATCTCATTAGCCACCGCATG;CE=1.98573	GT:GL:GQ:FT:RCL:RC:RCR:CN:DR:DV:RR:RV	0/0:0,-3.61065,-43.5983:36:PASS:59:109:40:2:37:0:12:0	1/1:-58.4982,-4.81472,0:48:PASS:61:3:57:0:0:31:0:16	0/0:0,-5.41577,-62.7972:54:PASS:75:84:45:1:8:0:18:0	0/0:0,-19.5574,-230.49:10000:PASS:180:337:133:2:104:1:65:0	unitig_0	5823544	484	N	<DEL>	.	.	SVTYPE=DEL;STRANDS=+-:38;SVLEN=-590;END=5824134;CIPOS=-4,3;CIEND=-3,0;CIPOS95=0,0;CIEND95=0,0;SU=38;PE=29;SR=9	GT:SU:PE:SR	./.:0:0:0	./.:38:29:9	./.:0:0:0	./.:0:0:0
unitig_0	5841317	5842475	-	-	DEL	-	1158	1	0	0	1	0	TM1119_g1749		unitig_0	5841317	5842475	-	-	PM448_GAP	-	unitig_0	5841317	DEL00000726	G	<DEL>	.	PASS	IMPRECISE;SVTYPE=DEL;SVMETHOD=EMBL.DELLYv0.7.7;CHR2=unitig_0;END=5842476;PE=19;MAPQ=60;CT=3to5;CIPOS=-84,84;CIEND=-84,84	GT:GL:GQ:FT:RCL:RC:RCR:CN:DR:DV:RR:RV	0/0:0,-15.3378,-273.685:154:PASS:112:212:111:2:51:0:0:0	0/0:0,-8.42883,-168:84:PASS:70:331:245:2:28:0:0:0	1/1:-112.6,-5.71956,0:57:PASS:83:0:265:0:0:19:0:0	./.:0,0,0:0:LowQual:0:7:303:0:0:0:0:0	unitig_0	5841316	488	N	<DEL>	.	.	SVTYPE=DEL;STRANDS=+-:24;SVLEN=-1159;END=5842475;CIPOS=-10,9;CIEND=-10,1;CIPOS95=-1,1;CIEND95=-1,0;IMPRECISE;SU=24;PE=21;SR=3	GT:SU:PE:SR	./.:0:0:0	./.:0:0:0	./.:24:21:3	./.:0:0:0
unitig_0	5862885	5864642	DEL	-	DEL	DEL	1757	0	0	0	0	1		TM1119_g1756	unitig_0	5862885	5864642	PA7_GAP	-	PM448_GAP	PM449_GAP	unitig_0	5862882	DEL00000730	G	<DEL>	.	PASS	PRECISE;SVTYPE=DEL;SVMETHOD=EMBL.DELLYv0.7.7;CHR2=unitig_0;END=5864643;PE=40;MAPQ=60;CT=3to5;CIPOS=-5,5;CIEND=-5,5;INSLEN=0;HOMLEN=4;SR=10;SRQ=0.97541;CONSENSUS=CTGTTTATTACGCCCCTCCAAACCTAACCTGATCTTTCAGTTTGGCAGCTTTGGCCTCCAGGCATGTGATCGAACCTCGCAGCGGTGCACCTGGGGGTGCTGGATTGATGACTGAATGAGTG;CE=1.98417	GT:GL:GQ:FT:RCL:RC:RCR:CN:DR:DV:RR:RV	1/1:-39.2981,-3.3094,0:33:PASS:155:0:186:0:0:40:0:11	0/0:0,-15.3444,-181.192:154:PASS:158:1566:158:10:55:0:51:0	1/1:-119.495,-10.2299,0:102:PASS:223:2:139:0:0:66:0:34	1/1:-251.592,-20.763,0:10000:PASS:427:3:568:0:0:92:0:69	unitig_0	5862884	492	N	<DEL>	.	.	SVTYPE=DEL;STRANDS=+-:274;SVLEN=-1758;END=5864642;CIPOS=0,0;CIEND=0,0;CIPOS95=0,0;CIEND95=0,0;SU=274;PE=200;SR=74	GT:SU:PE:SR	./.:45:40:5	./.:0:0:0	./.:88:67:21	./.:141:93:48
unitig_0	5876564	5876834	-	-	DEL	-	270	0	1	0	1	0	TM1119_g1760		unitig_0	5876564	5876834	-	-	PM448_GAP	-	unitig_0	5876562	DEL00000733	CTAGAGGCGTTTTGGTTGGGAACTTTCGAGAGATCAACAAAGGAAACGGCAGTACTATTAGGGCTAAACTTCTGACAATATGGACGGTTCTAGTGCTTCGTGAGGACATCCTACAGTTCCGCTCTAGATACGAGAAACTGGCAGAGCTACCACTTTGACAGCTTTAGTATATCGATTATCTTCTCATCATTTACTATCCCGATAGAGCTTGGCGCTTTTAGTATCTCCATATCGTCTCCAATAGTAGTGTCGTAGCTATTTGTCCGCTATCGA	C	.	PASS	PRECISE;SVTYPE=DEL;SVMETHOD=EMBL.DELLYv0.7.7;CHR2=unitig_0;END=5876835;PE=0;MAPQ=60;CT=3to5;CIPOS=-2,2;CIEND=-2,2;INSLEN=0;HOMLEN=2;SR=10;SRQ=0.965517;CONSENSUS=TCGTAATCGCCAAAGAGCTTGCAGAGGACATCAGAAAAGTCCTCGAAGTAGCTTACCAGCTGCTGGCCATTGACGCTGTCTGGAGCTTTCGCTTGATGCTATGGATGATGATCTCTATGCAGAGCTTATCAAATATCAAGACATCTTTATCGATTCTCGTGAAGGCAGTGTTGG;CE=1.99275	GT:GL:GQ:FT:RCL:RC:RCR:CN:DR:DV:RR:RV	0/0:0,-6.3181,-76.0965:63:PASS:2601:6998:3372:2:0:0:21:0	0/0:0,-3.31001,-40.1987:33:PASS:3780:6555:2060:2:0:0:11:0	1/1:-193.494,-15.6476,0:157:PASS:7932:64:6286:0:0:0:0:52	0/0:0,-19.5599,-239.893:10000:PASS:11935:23405:9879:2:0:0:65:0	unitig_0	5876563	493	N	<DEL>	.	.	SVTYPE=DEL;STRANDS=+-:48;SVLEN=-271;END=5876834;CIPOS=0,0;CIEND=0,0;CIPOS95=0,0;CIEND95=0,0;SU=48;PE=3;SR=45	GT:SU:PE:SR	./.:0:0:0	./.:0:0:0	./.:48:3:45	./.:0:0:0
unitig_0	5881697	5887078	-	-	-	DEL	5381	1	1	0	2	2	TM1119_g1761;TM1119_g1764	TM1119_g1762;TM1119_g1763	unitig_0	5881697	5887078	-	-	-	PM449_GAP	unitig_0	5881694	DEL00000734	A	<DEL>	.	PASS	PRECISE;SVTYPE=DEL;SVMETHOD=EMBL.DELLYv0.7.7;CHR2=unitig_0;END=5887079;PE=58;MAPQ=60;CT=3to5;CIPOS=-3,3;CIEND=-3,3;INSLEN=0;HOMLEN=3;SR=10;SRQ=0.97546;CONSENSUS=TCTGGTTGCTCATCGCCAACGCCAATCTACATCCATCCATTGCAGAGGTCATCTCTAACGCAACCAGCACATTCCACAAGCTGAGAGATGTTTGCGTAACGAGTAGCAGCCTTTGTTGTGGTGCTCGACGATACTTTTCCCTCAACACCGACCTCGGCCTCGA;CE=1.98161	GT:GL:GQ:FT:RCL:RC:RCR:CN:DR:DV:RR:RV	0/0:0,-4.21132,-49.0969:42:PASS:544:760:503:1:37:0:14:0	0/0:0,-15.0436,-176.192:150:PASS:973:2532:881:3:88:0:50:0	0/0:0,-21.0614,-248.489:10000:PASS:1352:2339:1400:2:115:0:70:0	1/1:-174.894,-14.4437,0:144:PASS:1311:5:1386:0:0:59:0:48	unitig_0	5881696	495	N	<DEL>	.	.	SVTYPE=DEL;STRANDS=+-:95;SVLEN=-5382;END=5887078;CIPOS=0,0;CIEND=0,0;CIPOS95=0,0;CIEND95=0,0;SU=95;PE=61;SR=34	GT:SU:PE:SR	./.:0:0:0	./.:0:0:0	./.:0:0:0	./.:94:60:34
unitig_0	5882896	5883715	DEL	-	-	-	819	0	0	0	0	0			unitig_0	5882896	5883715	PA7_GAP	-	-	-	unitig_0	5882896	DEL00000735	T	<DEL>	.	PASS	IMPRECISE;SVTYPE=DEL;SVMETHOD=EMBL.DELLYv0.7.7;CHR2=unitig_0;END=5883716;PE=41;MAPQ=60;CT=3to5;CIPOS=-50,50;CIEND=-50,50	GT:GL:GQ:FT:RCL:RC:RCR:CN:DR:DV:RR:RV	1/1:-220.899,-12.3415,0:123:PASS:95:0:88:0:0:41:0:0	0/0:0,-9.03088,-178.6:90:PASS:125:107:64:1:30:0:0:0	0/0:0,-11.1295,-204.291:111:PASS:170:150:71:1:37:0:0:0	./.:0,0,0:0:LowQual:0:0:0:-1:0:0:0:0	unitig_0	5882895	494	N	<DEL>	.	.	SVTYPE=DEL;STRANDS=+-:53;SVLEN=-820;END=5883715;CIPOS=-10,9;CIEND=-3,1;CIPOS95=0,0;CIEND95=0,0;SU=53;PE=41;SR=12	GT:SU:PE:SR	./.:53:41:12	./.:0:0:0	./.:0:0:0	./.:0:0:0
unitig_0	5894059	5895726	DEL	-	-	DEL	1667	1	0	0	1	0	TM1119_g1767		unitig_0	5894059	5895726	PA7_GAP	-	-	PM449_GAP	unitig_0	5894058	DEL00000737	T	<DEL>	.	PASS	PRECISE;SVTYPE=DEL;SVMETHOD=EMBL.DELLYv0.7.7;CHR2=unitig_0;END=5895727;PE=64;MAPQ=60;CT=3to5;CIPOS=-2,2;CIEND=-2,2;INSLEN=0;HOMLEN=1;SR=10;SRQ=0.981818;CONSENSUS=CCTCCATTTTTCCAGTAACGAATGAAGGAGACAGACATGGCCTCACTGCTCTGGCAGAGTCTGCTGCTAGTGTGGTGGCATTTTTAGACACCCTCCACTATCGAAGAGGCCATCGCTCTCAGGGACTTGGAGTCCGACGGCGCCAATGATGCCGATCCCAAGGTC;CE=1.99319	GT:GL:GQ:FT:RCL:RC:RCR:CN:DR:DV:RR:RV	1/1:-41.6978,-3.61014,0:36:PASS:183:0:177:0:0:47:0:12	0/0:0,-10.2287,-118.794:102:PASS:154:727:523:2:21:0:34:0	./.:0,0,0:0:LowQual:190:47:1:0:1:0:0:0	1/1:-204.486,-18.048,0:10000:PASS:474:2:333:0:0:64:0:60	unitig_0	5894058	496	N	<DEL>	.	.	SVTYPE=DEL;STRANDS=+-:163;SVLEN=-1668;END=5895726;CIPOS=0,0;CIEND=0,0;CIPOS95=0,0;CIEND95=0,0;SU=163;PE=111;SR=52	GT:SU:PE:SR	./.:54:47:7	./.:0:0:0	./.:0:0:0	./.:109:64:45
unitig_0	5902534	5902867	-	-	DEL	-	333	0	0	0	0	0			unitig_0	5902534	5902867	-	-	PM448_GAP	-	unitig_0	5902524	DEL00000740	A	<DEL>	.	PASS	PRECISE;SVTYPE=DEL;SVMETHOD=EMBL.DELLYv0.7.7;CHR2=unitig_0;END=5902868;PE=73;MAPQ=60;CT=3to5;CIPOS=-4,4;CIEND=-4,4;INSLEN=0;HOMLEN=4;SR=10;SRQ=0.974522;CONSENSUS=CTTGGGGCATGTAGCAGCTAAGTGGCCTAGAGACGAGGGCGAACGGGGTAGGGGAGGGGGTTTGCAAGGGACATGCTTGCGATTATATGTGTACTCTTGTCGGCCATGCTAGACATGCCTGCACAGCACCTAGTGTACTCCGCTGCCTACCTACCTA;CE=1.97853	GT:GL:GQ:FT:RCL:RC:RCR:CN:DR:DV:RR:RV	0/0:0,-2.10423,-22.297:21:PASS:3866:5702:3120:2:33:0:7:0	./.:0,0,0:0:LowQual:811:11172:7874:3:29:0:0:0	1/1:-221.588,-19.2541,0:10000:PASS:13335:144:9918:0:0:73:0:64	0/0:0,-15.6445,-182.291:157:PASS:12684:21309:11796:2:76:0:52:0	unitig_0	5902526	498	N	<DEL>	.	.	SVTYPE=DEL;STRANDS=+-:70;SVLEN=-341;END=5902867;CIPOS=0,0;CIEND=0,0;CIPOS95=0,0;CIEND95=0,0;SU=70;PE=18;SR=52	GT:SU:PE:SR	./.:0:0:0	./.:0:0:0	./.:70:18:52	./.:0:0:0
unitig_0	5910811	5911799	DEL	-	DEL	DEL	988	0	0	0	0	0			unitig_0	5910811	5911799	PA7_GAP	-	PM448_GAP	PM449_GAP	unitig_0	5910801	DEL00000741	T	<DEL>	.	PASS	IMPRECISE;SVTYPE=DEL;SVMETHOD=EMBL.DELLYv0.7.7;CHR2=unitig_0;END=5911800;PE=48;MAPQ=60;CT=3to5;CIPOS=-50,50;CIEND=-50,50	GT:GL:GQ:FT:RCL:RC:RCR:CN:DR:DV:RR:RV	1/1:-158.798,-9.63051,0:96:PASS:72:0:121:0:0:32:0:0	0/0:0,-4.51544,-90:45:PASS:123:134:94:1:15:0:0:0	1/1:-200.4,-10.5359,0:105:PASS:90:0:216:0:0:35:0:0	1/1:-284.999,-15.0506,0:151:PASS:172:0:275:0:0:50:0:0	unitig_0	5910794	504	N	<DEL>	.	.	SVTYPE=DEL;STRANDS=+-:159;SVLEN=-1005;END=5911799;CIPOS=0,0;CIEND=0,0;CIPOS95=0,0;CIEND95=0,0;SU=159;PE=111;SR=48	GT:SU:PE:SR	./.:33:32:1	./.:0:0:0	./.:56:39:17	./.:70:40:30
unitig_0	5911240	5911392	-	DEL	-	-	152	0	0	0	0	0			unitig_0	5911240	5911392	-	PM1118_GAP	-	-	unitig_0	5911239	DEL00000742	TTTCCACTACACCAATGTAGTTAGAGCGCATGTACCCATACGCATACTGTGATTACTGGTCTGCACAGCGTGTCGAGTACACCTTTGTAGAGAAAGTTTTGGCAAGCTGCCCGGCTTTTCAACCTGCTGTTACACGTACAGCCGCTCTCCCTCG	T	.	PASS	PRECISE;SVTYPE=DEL;SVMETHOD=EMBL.DELLYv0.7.7;CHR2=unitig_0;END=5911393;PE=0;MAPQ=60;CT=3to5;CIPOS=-2,2;CIEND=-2,2;INSLEN=0;HOMLEN=2;SR=10;SRQ=0.982456;CONSENSUS=ATTAAAAAGAAGCGAAAAAGGCAGGAAGATTGTTGACGAGGTGTGTGAACCAATCATTCATACCACCCTGCAGGCGGACCTGACTATGAGCGCCATCGCCGATGACACCGACCGCTCTTGCAGTCACGCAAGGCTTTCCCGCCCGAAAGTTTATTGATATTTCCTTCTTCT;CE=1.99559	GT:GL:GQ:FT:RCL:RC:RCR:CN:DR:DV:RR:RV	./.:0,0,0:0:LowQual:0:0:0:-1:0:0:0:0	1/1:-123.294,-10.5297,0:105:PASS:2605:12:1081:0:0:0:0:35	./.:0,0,0:0:LowQual:0:0:0:-1:0:0:0:0	./.:0,0,0:0:LowQual:0:0:0:-1:0:0:0:0	unitig_0	5911239	502	N	<DEL>	.	.	SVTYPE=DEL;STRANDS=+-:30;SVLEN=-153;END=5911392;CIPOS=-1,0;CIEND=-1,0;CIPOS95=0,0;CIEND95=0,0;SU=30;PE=0;SR=30	GT:SU:PE:SR	./.:0:0:0	./.:29:0:29	./.:0:0:0	./.:0:0:0
unitig_0	5921184	5921820	DEL	DEL	DEL	-	636	0	0	0	0	0			unitig_0	5921184	5921820	PA7_GAP	PM1118_GAP	PM448_GAP	-	unitig_0	5921183	DEL00000745	T	<DEL>	.	PASS	IMPRECISE;SVTYPE=DEL;SVMETHOD=EMBL.DELLYv0.7.7;CHR2=unitig_0;END=5921821;PE=57;MAPQ=60;CT=3to5;CIPOS=-50,50;CIEND=-50,50	GT:GL:GQ:FT:RCL:RC:RCR:CN:DR:DV:RR:RV	1/1:-226.448,-12.8922,0:129:PASS:60:0:68:0:0:43:0:0	1/1:-251.794,-13.8411,0:138:PASS:188:0:66:0:0:46:0:0	1/1:-312.313,-17.0716,0:10000:PASS:233:0:109:0:0:57:0:0	0/0:0,-34.0163,-674.8:10000:PASS:158:395:179:2:113:0:0:0	unitig_0	5921183	505	N	<DEL>	.	.	SVTYPE=DEL;STRANDS=+-:141;SVLEN=-637;END=5921820;CIPOS=-3,100;CIEND=-138,9;CIPOS95=-1,33;CIEND95=-27,0;IMPRECISE;SU=141;PE=141;SR=0	GT:SU:PE:SR	./.:41:41:0	./.:45:45:0	./.:55:55:0	./.:0:0:0
unitig_0	5968891	5969489	DEL	-	-	-	598	0	0	0	0	0			unitig_0	5968891	5969489	PA7_GAP	-	-	-	unitig_0	5968886	DEL00000752	A	<DEL>	.	PASS	IMPRECISE;SVTYPE=DEL;SVMETHOD=EMBL.DELLYv0.7.7;CHR2=unitig_0;END=5969490;PE=40;MAPQ=60;CT=3to5;CIPOS=-50,50;CIEND=-50,50	GT:GL:GQ:FT:RCL:RC:RCR:CN:DR:DV:RR:RV	1/1:-222.5,-12.041,0:120:PASS:72:0:61:0:0:40:0:0	0/0:0,-8.42882,-166.7:84:PASS:46:92:44:2:28:0:0:0	0/0:0,-6.92368,-138:69:PASS:48:85:35:2:23:0:0:0	0/0:0,-28.3116,-639.594:10000:PASS:148:384:187:2:113:1:0:0	unitig_0	5968882	513	N	<DEL>	.	.	SVTYPE=DEL;STRANDS=+-:44;SVLEN=-607;END=5969489;CIPOS=-8,9;CIEND=-10,9;CIPOS95=0,1;CIEND95=0,0;IMPRECISE;SU=44;PE=40;SR=4	GT:SU:PE:SR	./.:44:40:4	./.:0:0:0	./.:0:0:0	./.:0:0:0
unitig_0	6003102	6003371	DEL	-	DEL	-	269	0	0	0	0	0			unitig_0	6003102	6003371	PA7_GAP	-	PM448_GAP	-	unitig_0	6003100	DEL00000760	ATGGGCGAGCTCGTCGAAGTACCTCTTCGGCTTTTGACAACCCAAAATGAGCAGTTTATAGCACATGACCTGGGTTGAGTAATCTTGAAGCTGATTCGCAACTTGCAATGCCATCTCCACAGGCGCATCTGCTTTCTTGTGGAAGATCGGAAATCGTCCTCCTTGGCTTCTGAGCCGCTGGTGGCACGTAGATTGGGAGTGTTATGCATATTCGACGATAGAATGCGAGACCAGTAAAGTCCCCTAGATAGCTAAAGAGTTCGCGAACATGG	A	.	PASS	PRECISE;SVTYPE=DEL;SVMETHOD=EMBL.DELLYv0.7.7;CHR2=unitig_0;END=6003372;PE=0;MAPQ=60;CT=3to5;CIPOS=-3,3;CIEND=-3,3;INSLEN=0;HOMLEN=3;SR=10;SRQ=0.991803;CONSENSUS=TGAGACGCGCATGTGGTTCTCGTTATCGCCTTGCACTGATTTCTGTAGATCGTCCTTACATCTGAGTTTCAGCAGACTTGGCAACTAACATCCATCTCAGAAACGGCCTCGTCCTTCTGGCT;CE=1.97463	GT:GL:GQ:FT:RCL:RC:RCR:CN:DR:DV:RR:RV	1/1:-53.3973,-4.5127,0:45:PASS:2066:21:2612:0:0:0:0:15	0/0:0,-6.01836,-73.6978:60:PASS:3710:6021:2637:2:0:0:20:0	1/1:-37.6974,-3.30876,0:33:PASS:2126:15:1931:0:0:0:0:11	0/0:0,-21.665,-262.391:10000:PASS:11224:22239:12975:2:0:0:72:0	unitig_0	6003101	518	N	<DEL>	.	.	SVTYPE=DEL;STRANDS=+-:15;SVLEN=-270;END=6003371;CIPOS=-10,9;CIEND=-2,1;CIPOS95=0,0;CIEND95=0,0;SU=15;PE=1;SR=14	GT:SU:PE:SR	./.:6:0:6	./.:0:0:0	./.:9:1:8	./.:0:0:0
unitig_0	6012424	6013175	DEL	-	-	-	751	0	0	1	1	0	TM1119_g1805		unitig_0	6012424	6013175	PA7_GAP	-	-	-	unitig_0	6012420	DEL00000762	G	<DEL>	.	PASS	PRECISE;SVTYPE=DEL;SVMETHOD=EMBL.DELLYv0.7.7;CHR2=unitig_0;END=6013176;PE=45;MAPQ=60;CT=3to5;CIPOS=-6,6;CIEND=-6,6;INSLEN=0;HOMLEN=6;SR=10;SRQ=0.964912;CONSENSUS=TTCTCCCTTTCTAAACGCTGAGTTGCCTTTCGCTTTGCTTTGGCATGTCTTTTCAGCCAGTAGGTTCCGTCCAATCTTACGAGTGTCCGCGTACCCAAAGATCTGCCTCAGAAAC;CE=1.95209	GT:GL:GQ:FT:RCL:RC:RCR:CN:DR:DV:RR:RV	1/1:-62.4966,-5.41511,0:54:PASS:93:0:84:0:0:45:0:18	0/0:0,-4.81445,-57.698:48:PASS:115:222:74:2:51:0:16:0	0/0:0,-4.51304,-51.7976:45:PASS:127:285:66:3:56:0:15:0	0/0:0,-9.62797,-113.495:96:PASS:207:422:219:2:117:0:32:0	unitig_0	6012423	128	N	<DEL>	.	.	SVTYPE=DEL;STRANDS=+-:52;SVLEN=-752;END=6013175;CIPOS=-3,3;CIEND=-10,9;CIPOS95=0,0;CIEND95=0,0;SU=52;PE=44;SR=8	GT:SU:PE:SR	./.:52:44:8	./.:0:0:0	./.:0:0:0	./.:0:0:0
unitig_0	6058378	6058468	-	-	DEL	-	90	0	0	1	1	0	TM1119_g1819		unitig_0	6058378	6058468	-	-	PM448_GAP	-	unitig_0	6058376	DEL00000765	CGGAGACACACCAATCAAGATGGTAGGAGGCCAGAGGGCGGCACCTGGAAATCCGACCCGAGCGACGCTGATATGAGACCAATCAATGTCGGA	C	.	PASS	PRECISE;SVTYPE=DEL;SVMETHOD=EMBL.DELLYv0.7.7;CHR2=unitig_0;END=6058469;PE=0;MAPQ=60;CT=3to5;CIPOS=-4,4;CIEND=-4,4;INSLEN=0;HOMLEN=5;SR=10;SRQ=1;CONSENSUS=CTGAATCCAAAACTCACCAGTAAACGAGAGGAGCTGCTCTGCGTAGGATATCTTGGGCTGCTTGGCTGTCGATGGCAGAAGACGAGAAGGCTCTGAAGAGAGTTCCGAATGCCCTCGCCGTCAAACAGGCCGGCAATTGGATGGTTTGCAATAGGTGTAGCGACAC;CE=1.98466	GT:GL:GQ:FT:RCL:RC:RCR:CN:DR:DV:RR:RV	0/0:0,-3.91052,-45.0971:39:PASS:1191:1493:652:2:0:0:13:0	0/0:0,-6.6186,-77.9959:66:PASS:1404:2516:1394:2:0:0:22:0	1/1:-134.295,-11.4339,0:114:PASS:1572:47:1800:0:0:0:0:38	0/0:0,-7.73297,-130.293:77:PASS:2768:4855:2063:2:0:0:38:1	unitig_0	6058377	531	N	<DEL>	.	.	SVTYPE=DEL;STRANDS=+-:29;SVLEN=-91;END=6058468;CIPOS=-1,0;CIEND=-1,0;CIPOS95=0,0;CIEND95=0,0;SU=29;PE=0;SR=29	GT:SU:PE:SR	./.:0:0:0	./.:0:0:0	./.:29:0:29	./.:0:0:0
unitig_0	6067585	6068475	-	-	DEL	DEL	890	1	0	0	1	0	TM1119_g1823		unitig_0	6067585	6068475	-	-	PM448_GAP	PM449_GAP	unitig_0	6067585	DEL00000766	A	<DEL>	.	PASS	IMPRECISE;SVTYPE=DEL;SVMETHOD=EMBL.DELLYv0.7.7;CHR2=unitig_0;END=6068476;PE=58;MAPQ=60;CT=3to5;CIPOS=-63,63;CIEND=-63,63	GT:GL:GQ:FT:RCL:RC:RCR:CN:DR:DV:RR:RV	0/0:0,-12.6377,-229.094:126:PASS:79:172:103:2:42:0:0:0	0/0:0,-12.6431,-248.6:126:PASS:397:274:89:1:42:0:0:0	1/1:-544.2,-27.9956,0:10000:PASS:428:0:165:0:0:93:0:0	1/1:-338.399,-17.4592,0:10000:PASS:203:0:233:0:0:58:0:0	unitig_0	6067584	541	N	<DEL>	.	.	SVTYPE=DEL;STRANDS=+-:102;SVLEN=-891;END=6068475;CIPOS=0,0;CIEND=0,0;CIPOS95=0,0;CIEND95=0,0;SU=102;PE=40;SR=62	GT:SU:PE:SR	./.:0:0:0	./.:0:0:0	./.:58:23:35	./.:44:17:27
unitig_0	6170092	6170361	DEL	-	-	-	269	0	0	0	0	0			unitig_0	6170092	6170361	PA7_GAP	-	-	-	unitig_0	6170079	DEL00000771	TTGCGCCGGCGGCGAGGTCTGGGTGACGAGCGGCGTGTTGACTGTCAAGGTTGGTAGATGCGCCATGTAGAAAGACGGCGAGGTAGGGGCAGAGCGTGGCCTTGTCTTGATGTATGGTGATGTAGGTGTGTGTTGCGTAGCTAACCTCTTGTGGCAGATTGTCCGTGTGGAGCGAAAAGATGACGGCCGGTGCGACAGGGTCTGGCGGTGTTTGGCCGGATAGTGGTGATTGTTGAGAGAGGTGCAGATTTCATGGCAAAAAGGGTCGAGCGACGGCATGTGA	T	.	PASS	PRECISE;SVTYPE=DEL;SVMETHOD=EMBL.DELLYv0.7.7;CHR2=unitig_0;END=6170362;PE=0;MAPQ=60;CT=3to5;CIPOS=-13,13;CIEND=-13,13;INSLEN=0;HOMLEN=13;SR=6;SRQ=0.98;CONSENSUS=GTCGGCCACAGACCCACCAGCGAAGCGCCGCAAGGAGACACGGTGGTCCAAAGCGCGCATTGCGCCAGGCGGCTGACGATGTGGACGTGGACGTGGACGT;CE=1.88268	GT:GL:GQ:FT:RCL:RC:RCR:CN:DR:DV:RR:RV	1/1:-47.1969,-4.21133,0:42:PASS:2068:62:1905:0:0:0:0:14	0/0:0,-34.8987,-401.979:10000:PASS:21435:34485:17266:2:0:0:116:0	0/0:0,-18.652,-215.188:10000:PASS:18325:36509:18711:2:0:0:62:0	0/0:0,-7.22112,-84.2964:72:PASS:6095:16528:8721:2:0:0:24:0	unitig_0	6170085	545	N	<DEL>	.	.	SVTYPE=DEL;STRANDS=+-:10;SVLEN=-276;END=6170361;CIPOS=-4,2;CIEND=-6,9;CIPOS95=0,0;CIEND95=0,0;SU=10;PE=0;SR=10	GT:SU:PE:SR	./.:10:0:10	./.:0:0:0	./.:0:0:0	./.:0:0:0
unitig_0	6174217	6174794	DEL	-	DEL	-	577	0	0	0	0	0			unitig_0	6174217	6174794	PA7_GAP	-	PM448_GAP	-	unitig_0	6174210	DEL00000774	T	<DEL>	.	PASS	PRECISE;SVTYPE=DEL;SVMETHOD=EMBL.DELLYv0.7.7;CHR2=unitig_0;END=6174795;PE=16;MAPQ=60;CT=3to5;CIPOS=-8,8;CIEND=-8,8;INSLEN=0;HOMLEN=7;SR=10;SRQ=0.963855;CONSENSUS=CCCTTATCTGCTCTTGTACACATCACGTAATGAAGCTAGCCCTCTAACTGTCCAATAACTGTCTACTTGCCTCTTGACCGTGTTAGATGCCATCGAAAACTGGAACGGCAGCTTTCCCAGCCGATCGGAGACATTAGACCTAACCCATACAGACTGTCGCGGTAGA;CE=1.98391	GT:GL:GQ:FT:RCL:RC:RCR:CN:DR:DV:RR:RV	1/1:-38.0968,-3.30812,0:33:PASS:69:26:61:0:0:46:0:11	0/0:0,-12.0363,-145.995:120:PASS:133:162:32:2:37:0:40:0	1/1:-101.788,-9.31954,0:93:PASS:138:2:21:0:0:16:0:31	0/0:0,-12.6372,-151.294:126:PASS:131:345:170:2:120:0:42:0	unitig_0	6174216	546	N	<DEL>	.	.	SVTYPE=DEL;STRANDS=+-:76;SVLEN=-578;END=6174794;CIPOS=-10,9;CIEND=-2,0;CIPOS95=0,0;CIEND95=0,0;SU=76;PE=62;SR=14	GT:SU:PE:SR	./.:48:46:2	./.:0:0:0	./.:28:16:12	./.:0:0:0
unitig_0	6439590	6443162	DEL	-	-	-	3572	0	0	0	0	2		TM1119_g1948;TM1119_g1949	unitig_0	6439590	6443162	PA7_GAP	-	-	-	unitig_0	6439590	DEL00000794	G	<DEL>	.	PASS	IMPRECISE;SVTYPE=DEL;SVMETHOD=EMBL.DELLYv0.7.7;CHR2=unitig_0;END=6443167;PE=26;MAPQ=60;CT=3to5;CIPOS=-206,206;CIEND=-206,206	GT:GL:GQ:FT:RCL:RC:RCR:CN:DR:DV:RR:RV	1/1:-141.2,-7.82649,0:78:PASS:392:13:379:0:0:26:0:0	0/0:0,-7.22471,-143.6:72:PASS:288:586:236:2:24:0:0:0	0/0:0,-6.92368,-137.1:69:PASS:888:759:365:1:23:0:0:0	0/0:0,-22.8782,-454.2:10000:PASS:877:1815:961:2:76:0:0:0	unitig_0	6439588	551	N	<DEL>	.	.	SVTYPE=DEL;STRANDS=+-:30;SVLEN=-3578;END=6443166;CIPOS=-10,253;CIEND=-324,1;CIPOS95=0,157;CIEND95=-191,0;IMPRECISE;SU=30;PE=30;SR=0	GT:SU:PE:SR	./.:30:30:0	./.:0:0:0	./.:0:0:0	./.:0:0:0
unitig_0	6444213	6444409	DEL	-	-	-	196	0	0	1	1	0	TM1119_g1950		unitig_0	6444213	6444409	PA7_GAP	-	-	-	unitig_0	6444211	DEL00000795	CTGTCGCACATGGTATGAAGCCCACGCTAGCTTCATACCTCCTTGCTATCTTCAACGCTTCGTCAACCCTTGGCCGTATTCTACCGGGGATGGTGGCAGATAAATTCGGACATCTCAATGTTTATGCTGTGGCCGGGATCTCTACTGGTATTATCACTCTTTGCTGGAGCAGGGCGACAAGCAATGCGGGGATCATTGT	C	.	PASS	PRECISE;SVTYPE=DEL;SVMETHOD=EMBL.DELLYv0.7.7;CHR2=unitig_0;END=6444410;PE=0;MAPQ=60;CT=3to5;CIPOS=-3,3;CIEND=-3,3;INSLEN=0;HOMLEN=3;SR=10;SRQ=0.965217;CONSENSUS=CTCTATGTTTATCATACTCCTGGGCATGTACACCCCTGTCTACTACCTGCCTTCTTTCGCTTGGACATCACTAATAGGCTTTACCTCCGGTACCATTCTCTCCGCCGCTGCAGCA;CE=1.91398	GT:GL:GQ:FT:RCL:RC:RCR:CN:DR:DV:RR:RV	1/1:-52.8974,-4.51285,0:45:PASS:1381:19:1874:0:0:0:0:15	0/0:0,-5.11466,-59.8972:51:PASS:1300:4691:2406:3:0:0:17:0	0/0:0,-10.8305,-127.993:108:PASS:3536:7953:4460:2:0:0:36:0	0/0:0,-22.2644,-260.788:10000:PASS:8892:19251:7153:2:0:0:74:0	unitig_0	6444212	552	N	<DEL>	.	.	SVTYPE=DEL;STRANDS=+-:7;SVLEN=-197;END=6444409;CIPOS=-5,4;CIEND=-5,4;CIPOS95=0,0;CIEND95=0,0;SU=7;PE=0;SR=7	GT:SU:PE:SR	./.:7:0:7	./.:0:0:0	./.:0:0:0	./.:0:0:0
unitig_0	6538448	6539246	-	DEL	DEL	DEL	798	0	0	0	0	0			unitig_0	6538448	6539246	-	PM1118_GAP	PM448_GAP	PM449_GAP	unitig_0	6538445	DEL00000806	A	<DEL>	.	PASS	PRECISE;SVTYPE=DEL;SVMETHOD=EMBL.DELLYv0.7.7;CHR2=unitig_0;END=6539254;PE=31;MAPQ=60;CT=3to5;CIPOS=-5,5;CIEND=-5,5;INSLEN=0;HOMLEN=5;SR=10;SRQ=0.984615;CONSENSUS=ACACGGGACGAGATGCGTTTCCCAGTTCAAAATGGGACCAACAAAGCCATTCTCTACCGTCTGTACCGAAGCCGCAAGACAACTCAGTAAGTACAATGAAGATCTGGGAGTGCTACTGTTCGTTGCAAGTTGTCATCCTCGGCCTGTTTTCAATGATGTGTTAGTGCGAGGTGTGGCCCTGTAAGGCCTGAAGGC;CE=1.99858	GT:GL:GQ:FT:RCL:RC:RCR:CN:DR:DV:RR:RV	0/0:0,-2.10588,-24.9987:21:PASS:77:179:105:2:54:0:7:0	1/1:-63.2971,-5.41564,0:54:PASS:68:2:71:0:0:31:0:18	1/1:-136.495,-11.4339,0:114:PASS:111:1:132:0:0:35:0:38	1/1:-235.691,-19.8586,0:10000:PASS:222:0:216:0:0:114:0:66	unitig_0	6538447	566	N	<DEL>	.	.	SVTYPE=DEL;STRANDS=+-:274;SVLEN=-806;END=6539253;CIPOS=0,0;CIEND=0,0;CIPOS95=0,0;CIEND95=0,0;SU=274;PE=182;SR=92	GT:SU:PE:SR	./.:0:0:0	./.:45:31:14	./.:65:36:29	./.:164:115:49
unitig_0	6620770	6621309	DEL	-	DEL	DEL	539	0	0	0	0	0			unitig_0	6620770	6621309	PA7_GAP	-	PM448_GAP	PM449_GAP	unitig_0	6620769	DEL00000812	A	<DEL>	.	PASS	PRECISE;SVTYPE=DEL;SVMETHOD=EMBL.DELLYv0.7.7;CHR2=unitig_0;END=6621310;PE=61;MAPQ=60;CT=3to5;CIPOS=-1,1;CIEND=-1,1;INSLEN=0;HOMLEN=0;SR=10;SRQ=0.990909;CONSENSUS=GTATGGCAGAATTGCCCGACGTATGGCATTAGGAACAGGTGCATATACTGTCGAGCCTAATCTGGATCTCCAAGCCACGTCCTACGGCGAAGCCTCTGATACGTCCCCGG;CE=1.99307	GT:GL:GQ:FT:RCL:RC:RCR:CN:DR:DV:RR:RV	1/1:-61.2967,-5.11424,0:51:PASS:73:0:60:0:0:61:0:17	0/0:0,-4.51298,-51.9975:45:PASS:32:70:39:2:23:0:15:0	1/1:-86.6939,-7.51968,0:75:PASS:44:0:49:0:0:37:0:25	1/1:-222.888,-18.9531,0:10000:PASS:150:0:134:0:0:87:0:63	unitig_0	6620769	570	N	<DEL>	.	.	SVTYPE=DEL;STRANDS=+-:261;SVLEN=-540;END=6621309;CIPOS=0,0;CIEND=0,0;CIPOS95=0,0;CIEND95=0,0;SU=261;PE=182;SR=79	GT:SU:PE:SR	./.:70:60:10	./.:0:0:0	./.:57:38:19	./.:134:84:50
unitig_0	6638782	6641082	DEL	DEL	DEL	DEL	2300	0	0	0	0	1		TM1119_g2010	unitig_0	6638782	6641082	PA7_GAP	PM1118_GAP	PM448_GAP	PM449_GAP	unitig_0	6638782	DEL00000814	C	<DEL>	.	PASS	IMPRECISE;SVTYPE=DEL;SVMETHOD=EMBL.DELLYv0.7.7;CHR2=unitig_0;END=6641062;PE=113;MAPQ=60;CT=3to5;CIPOS=-50,50;CIEND=-50,50	GT:GL:GQ:FT:RCL:RC:RCR:CN:DR:DV:RR:RV	1/1:-277.7,-14.4493,0:144:PASS:259:0:247:0:0:48:0:0	1/1:-215,-10.8371,0:108:PASS:314:3:293:0:0:36:0:0	1/1:-674.6,-34.0162,0:10000:PASS:591:0:592:0:0:113:0:0	1/1:-578.1,-29.1997,0:10000:PASS:635:0:618:0:0:97:0:0	unitig_0	6638781	571	N	<DEL>	.	.	SVTYPE=DEL;STRANDS=+-:406;SVLEN=-2280;END=6641061;CIPOS=0,0;CIEND=0,0;CIPOS95=0,0;CIEND95=0,0;SU=406;PE=305;SR=101	GT:SU:PE:SR	./.:53:48:5	./.:47:37:10	./.:162:117:45	./.:144:103:41
unitig_0	6734819	6734981	-	-	DEL	DEL	162	0	0	0	0	0			unitig_0	6734819	6734981	-	-	PM448_GAP	PM449_GAP	unitig_0	6734818	DEL00000829	TCCGCAGAGAAGGATGCCATCTCGGCTCCGGTTCTGAATTGTTTCGGCTCGGAGATCCGGCCACTTGGGGACCAGACGGAAGGAAACAATGCATATTCAAAAATAAAAGAGCACTGAAGGGGAGCAGAAGAAAATACACCCCCCCCCCCTCCCCCCCCAAAAAA	T	.	PASS	PRECISE;SVTYPE=DEL;SVMETHOD=EMBL.DELLYv0.7.7;CHR2=unitig_0;END=6734982;PE=0;MAPQ=60;CT=3to5;CIPOS=-1,1;CIEND=-1,1;INSLEN=0;HOMLEN=0;SR=10;SRQ=0.993789;CONSENSUS=ATCAAAAATACTGATATGGAACCCAGGGGTTCCGAGGGCAGCGATACTCATCCCCGTCCTTCAGAAAACCGATGTAAAAAAAAAGGAAATGTACAACACTGAGGATTCGCTGGTCGTCACCGACCCAACTACTGGTTCAGCCCTCAGCAGCTTGTCTCGGG;CE=1.98185	GT:GL:GQ:FT:RCL:RC:RCR:CN:DR:DV:RR:RV	0/0:0,-1.80499,-20.9988:18:PASS:996:2118:1730:2:0:0:6:0	0/0:0,-4.21289,-51.2985:42:PASS:2912:2450:1281:1:0:0:14:0	1/1:-115.495,-9.92878,0:99:PASS:1481:36:3397:0:0:0:0:33	1/1:-276.991,-22.8695,0:10000:PASS:6186:39:5295:0:0:0:0:76	unitig_0	6734818	575	N	<DEL>	.	.	SVTYPE=DEL;STRANDS=+-:74;SVLEN=-163;END=6734981;CIPOS=0,0;CIEND=0,0;CIPOS95=0,0;CIEND95=0,0;SU=74;PE=0;SR=74	GT:SU:PE:SR	./.:0:0:0	./.:0:0:0	./.:24:0:24	./.:50:0:50
unitig_0	6830655	6833733	DEL	DEL	DEL	DEL	3078	0	0	1	1	0	TM1119_g2066		unitig_0	6830655	6833733	PA7_GAP	PM1118_GAP	PM448_GAP	PM449_GAP	unitig_0	6830645	DEL00000836	G	<DEL>	.	PASS	PRECISE;SVTYPE=DEL;SVMETHOD=EMBL.DELLYv0.7.7;CHR2=unitig_0;END=6833734;PE=37;MAPQ=60;CT=3to5;CIPOS=-10,10;CIEND=-10,10;INSLEN=0;HOMLEN=10;SR=10;SRQ=1;CONSENSUS=GCTTGTTGCTCTAGCCCTGGCGCAAGAAGCCGCTATGCTTCCCGAAGATCCTTCCGCACGGTCTATCGACCAGGCGAAGTAGATTCTGACGGGGGATACCCGGTCAAGTCTATCCTCAGTCC;CE=1.97937	GT:GL:GQ:FT:RCL:RC:RCR:CN:DR:DV:RR:RV	1/1:-36.6989,-3.00924,0:30:PASS:309:0:338:0:0:37:0:10	1/1:-154.694,-12.9385,0:129:PASS:359:1:352:0:0:26:0:43	1/1:-197.292,-16.5485,0:10000:PASS:575:0:624:0:0:53:0:55	1/1:-237.091,-19.859,0:10000:PASS:766:0:806:0:0:93:0:66	unitig_0	6830654	576	N	<DEL>	.	.	SVTYPE=DEL;STRANDS=+-:347;SVLEN=-3079;END=6833733;CIPOS=0,0;CIEND=0,0;CIPOS95=0,0;CIEND95=0,0;SU=347;PE=212;SR=135	GT:SU:PE:SR	./.:46:37:9	./.:57:26:31	./.:93:54:39	./.:151:95:56
unitig_0	6970485	6970656	DEL	-	DEL	DEL	171	0	0	0	0	0			unitig_0	6970485	6970656	PA7_GAP	-	PM448_GAP	PM449_GAP	unitig_0	6970481	DEL00000847	CTCGGAGTTACGCCCCGAAGGGTTATCTGAACATTCACACAGAAGTGTGAATTCCCCGGGGGTTAGTACTCGGCGGGCGCTTGGAAGCAGCCAAGCTCCCCAACAGCCTTGATTCATGGGCTGCATGGGGTTAGAACCAGATGTCGTGGAGGTTAGCGCTCCCTTTGTTATCTCCA	C	.	PASS	PRECISE;SVTYPE=DEL;SVMETHOD=EMBL.DELLYv0.7.7;CHR2=unitig_0;END=6970657;PE=0;MAPQ=60;CT=3to5;CIPOS=-6,6;CIEND=-6,6;INSLEN=0;HOMLEN=5;SR=10;SRQ=0.982609;CONSENSUS=TCGTCAACGTTGATGATAGGAAGATGACGCTTTCCACATCATCAACGTTGACGATATCACCGCTCGAAGGAGTTATTCGTAATCTGACAACAAGAAACTTTCCCGACGCAAGCCT;CE=1.98415	GT:GL:GQ:FT:RCL:RC:RCR:CN:DR:DV:RR:RV	1/1:-62.6937,-5.71331,0:57:PASS:2050:62:1688:0:0:0:0:19	0/0:0,-11.1331,-131.995:111:PASS:4043:10301:5229:2:0:0:37:0	1/1:-218.887,-19.2526,0:10000:PASS:5765:169:6262:0:0:0:0:64	1/1:-200.491,-17.1495,0:10000:PASS:5338:164:4111:0:0:0:0:57	unitig_0	6970484	581	N	<DEL>	.	.	SVTYPE=DEL;STRANDS=+-:109;SVLEN=-172;END=6970656;CIPOS=0,0;CIEND=0,0;CIPOS95=0,0;CIEND95=0,0;SU=109;PE=2;SR=107	GT:SU:PE:SR	./.:9:0:9	./.:0:0:0	./.:55:1:54	./.:45:1:44
unitig_0	7067231	7068187	DEL	-	-	-	956	1	0	0	1	0	TM1119_g2131		unitig_0	7067231	7068187	PA7_GAP	-	-	-	unitig_0	7067231	DEL00000849	T	<DEL>	.	PASS	IMPRECISE;SVTYPE=DEL;SVMETHOD=EMBL.DELLYv0.7.7;CHR2=unitig_0;END=7068188;PE=54;MAPQ=51;CT=3to5;CIPOS=-50,50;CIEND=-50,50	GT:GL:GQ:FT:RCL:RC:RCR:CN:DR:DV:RR:RV	1/1:-270.598,-16.2539,0:10000:PASS:139:0:104:0:0:54:0:0	0/0:0,-15.9544,-315.5:10000:PASS:102:555:151:4:53:0:0:0	1/1:-218.9,-11.4391,0:114:PASS:139:0:103:0:0:38:0:0	0/0:0,-32.5112,-646.3:10000:PASS:239:444:235:2:108:0:0:0	unitig_0	7067232	583	N	<DEL>	.	.	SVTYPE=DEL;STRANDS=+-:115;SVLEN=-955;END=7068187;CIPOS=-10,7;CIEND=-2,0;CIPOS95=-1,0;CIEND95=0,0;IMPRECISE;SU=115;PE=94;SR=21	GT:SU:PE:SR	./.:65:56:9	./.:0:0:0	./.:50:38:12	./.:0:0:0
unitig_0	7067233	7068284	-	-	DEL	-	1051	1	0	0	1	0	TM1119_g2131		unitig_0	7067233	7068284	-	-	PM448_GAP	-	unitig_0	7067231	DEL00000849	T	<DEL>	.	PASS	IMPRECISE;SVTYPE=DEL;SVMETHOD=EMBL.DELLYv0.7.7;CHR2=unitig_0;END=7068188;PE=54;MAPQ=51;CT=3to5;CIPOS=-50,50;CIEND=-50,50	GT:GL:GQ:FT:RCL:RC:RCR:CN:DR:DV:RR:RV	1/1:-270.598,-16.2539,0:10000:PASS:139:0:104:0:0:54:0:0	0/0:0,-15.9544,-315.5:10000:PASS:102:555:151:4:53:0:0:0	1/1:-218.9,-11.4391,0:114:PASS:139:0:103:0:0:38:0:0	0/0:0,-32.5112,-646.3:10000:PASS:239:444:235:2:108:0:0:0	unitig_0	7067232	583	N	<DEL>	.	.	SVTYPE=DEL;STRANDS=+-:115;SVLEN=-955;END=7068187;CIPOS=-10,7;CIEND=-2,0;CIPOS95=-1,0;CIEND95=0,0;IMPRECISE;SU=115;PE=94;SR=21	GT:SU:PE:SR	./.:65:56:9	./.:0:0:0	./.:50:38:12	./.:0:0:0
unitig_0	7105128	7105222	-	-	-	DEL	94	0	0	0	0	0			unitig_0	7105128	7105222	-	-	-	PM449_GAP	unitig_0	7105123	DEL00000853	ATTTCTGGTGCCATAAGTAGCGTCTGATGGCATTCTTGGATCCTTCATCGCCTTCCGTAATCGGCGAATCTGGTAGTCTACAATGCCATTGAGTAAC	A	.	PASS	PRECISE;SVTYPE=DEL;SVMETHOD=EMBL.DELLYv0.7.7;CHR2=unitig_0;END=7105220;PE=0;MAPQ=60;CT=3to5;CIPOS=-6,6;CIEND=-6,6;INSLEN=0;HOMLEN=5;SR=10;SRQ=0.968354;CONSENSUS=TACTCTCATCCAGGTCACTTTCAACATCGAACATTGGCCAGATACTGAATCGTGGATACCGGGACCAATCATTATGCTCTCGATTTCGTTCTCCAAAGTCGCAATGATTGATGAGATCCGGCCAACAATACTAGCGCCGTACCACCGCTCCGTGGCGA;CE=1.98812	GT:GL:GQ:FT:RCL:RC:RCR:CN:DR:DV:RR:RV	0/0:0,-2.10661,-26.0994:21:PASS:893:2172:1049:2:0:0:7:0	0/0:0,-3.9116,-46.2982:39:PASS:967:1593:656:2:0:0:13:0	0/0:0,-6.91943,-80.7957:69:PASS:996:2916:2065:2:0:0:23:0	1/1:-224.091,-18.6552,0:10000:PASS:2552:184:1986:0:0:0:0:62	unitig_0	7105127	585	N	<DEL>	.	.	SVTYPE=DEL;STRANDS=+-:43;SVLEN=-92;END=7105219;CIPOS=0,0;CIEND=0,0;CIPOS95=0,0;CIEND95=0,0;SU=43;PE=0;SR=43	GT:SU:PE:SR	./.:0:0:0	./.:0:0:0	./.:0:0:0	./.:43:0:43
unitig_0	7222196	7222655	-	-	-	DEL	459	0	0	0	0	0			unitig_0	7222196	7222655	-	-	-	PM449_GAP	unitig_0	7222195	DEL00000859	C	<DEL>	.	PASS	PRECISE;SVTYPE=DEL;SVMETHOD=EMBL.DELLYv0.7.7;CHR2=unitig_0;END=7222656;PE=77;MAPQ=60;CT=3to5;CIPOS=-3,3;CIEND=-3,3;INSLEN=0;HOMLEN=2;SR=10;SRQ=0.975758;CONSENSUS=ATTGTATATCCTACCTTTAATCTAGCATTACTCTGGTGAGAGGCCACGATTTGGGCATCCCAAACGGGCGCTCTTTACCGCATTTTACACCGCCGTGTTGACCGCGTCCTTCAGATTTTGGACACAGCCAATAGAGAATCAGTACCTTCTATGTAGTAAAATCCA;CE=1.9852	GT:GL:GQ:FT:RCL:RC:RCR:CN:DR:DV:RR:RV	0/0:0,-2.4069,-27.9987:24:PASS:3783:9739:5067:2:40:0:8:0	0/0:0,-0.300943,-3.69991:5:LowQual:4341:10307:4341:2:30:0:1:0	0/0:0,-4.81502,-60.3985:48:PASS:3261:14852:6863:3:36:0:16:0	1/1:-197.387,-17.4468,0:10000:PASS:16708:45:18083:0:0:78:0:58	unitig_0	7222195	586	N	<DEL>	.	.	SVTYPE=DEL;STRANDS=+-:72;SVLEN=-465;END=7222660;CIPOS=0,0;CIEND=0,0;CIPOS95=0,0;CIEND95=0,0;SU=72;PE=32;SR=40	GT:SU:PE:SR	./.:0:0:0	./.:0:0:0	./.:0:0:0	./.:72:32:40
unitig_0	7380918	7381749	DEL	DEL	-	DEL	831	0	0	0	0	0			unitig_0	7380918	7381749	PA7_GAP	PM1118_GAP	-	PM449_GAP	unitig_0	7380915	DEL00000875	C	<DEL>	.	PASS	IMPRECISE;SVTYPE=DEL;SVMETHOD=EMBL.DELLYv0.7.7;CHR2=unitig_0;END=7381748;PE=70;MAPQ=60;CT=3to5;CIPOS=-181,181;CIEND=-181,181	GT:GL:GQ:FT:RCL:RC:RCR:CN:DR:DV:RR:RV	1/1:-168.799,-9.02986,0:90:PASS:116:0:87:0:0:30:0:0	1/1:-59.6994,-3.61178,0:36:PASS:52:1:66:0:0:12:0:0	1/1:-14.6,-0.903071,0:10:LowQual:71:776:70:11:0:3:0:0	1/1:-379.996,-21.0677,0:10000:PASS:251:0:265:0:0:70:0:0	unitig_0	7380916	588	N	<DEL>	.	.	SVTYPE=DEL;STRANDS=+-:117;SVLEN=-831;END=7381747;CIPOS=-10,322;CIEND=-240,1;CIPOS95=0,80;CIEND95=-81,1;IMPRECISE;SU=117;PE=117;SR=0	GT:SU:PE:SR	./.:30:30:0	./.:12:12:0	./.:3:3:0	./.:72:72:0
unitig_0	7689757	7689870	DEL	-	-	-	113	0	0	0	0	0			unitig_0	7689757	7689870	PA7_GAP	-	-	-	unitig_0	7689755	DEL00000900	TACTCTAGCAATAAGCGTTATATTTCATGTTCAATGTTACTATTCATGCTATTTGTGCTCGAGAAAACAGCGCCCCCTTTTCTAAGTAGCCTGTGGGTTGGCGGAGGTCTGGGAGC	T	.	PASS	PRECISE;SVTYPE=DEL;SVMETHOD=EMBL.DELLYv0.7.7;CHR2=unitig_0;END=7689871;PE=0;MAPQ=60;CT=3to5;CIPOS=-2,2;CIEND=-2,2;INSLEN=0;HOMLEN=2;SR=10;SRQ=0.983471;CONSENSUS=ACTTCAACACATTCTCCAGCTTCCTAGATATACAAGTGTCGCTAATATAATGTAACTGATCGAGCGTATACTCCAACAGACCTGGTTCTTATAGATTTGCTTGACATGACACAATATTGAT;CE=1.94132	GT:GL:GQ:FT:RCL:RC:RCR:CN:DR:DV:RR:RV	1/1:-56.5988,-4.51429,0:45:PASS:956:30:1340:0:0:0:0:15	0/0:0,-4.8142,-57.3977:48:PASS:918:2091:1179:2:0:0:16:0	0/0:0,-6.01818,-72.9976:60:PASS:837:3057:1337:3:0:0:20:0	0/0:0,-21.666,-262.992:10000:PASS:5418:10707:5224:2:0:0:72:0	unitig_0	7689756	592	N	<DEL>	.	.	SVTYPE=DEL;STRANDS=+-:6;SVLEN=-114;END=7689870;CIPOS=-6,5;CIEND=-6,5;CIPOS95=0,0;CIEND95=0,0;SU=6;PE=0;SR=6	GT:SU:PE:SR	./.:6:0:6	./.:0:0:0	./.:0:0:0	./.:0:0:0
unitig_0	7742070	7742679	-	DEL	-	-	609	0	0	0	0	0			unitig_0	7742070	7742679	-	PM1118_GAP	-	-	unitig_0	7742066	DEL00000906	G	<DEL>	.	PASS	PRECISE;SVTYPE=DEL;SVMETHOD=EMBL.DELLYv0.7.7;CHR2=unitig_0;END=7742680;PE=17;MAPQ=60;CT=3to5;CIPOS=-4,4;CIEND=-4,4;INSLEN=0;HOMLEN=4;SR=10;SRQ=0.983051;CONSENSUS=CATTAAGAAGCCACATATTGGCGATATACCGTGGTGCGACTCCAGATCTCAAGTGTTGGGCGAGCTTTATCGAGGTGGTCGTGGTCCATCCATCACTCACTCTCCAGTGCGCAGTACTCGGTTCAGGGAACTCACAAGTGTCTCTCGCCATCGAAGACATGTTGGACAACGGCGGTA;CE=1.9979	GT:GL:GQ:FT:RCL:RC:RCR:CN:DR:DV:RR:RV	0/0:0,-2.7072,-30.4979:27:PASS:79:137:62:2:48:0:9:0	1/1:-99.7955,-5.72622,0:57:PASS:50:2:42:0:1:17:1:29	0/0:0,-7.22192,-87.0972:72:PASS:75:66:38:1:12:0:24:0	0/0:0,-9.02695,-107.096:90:PASS:168:361:160:2:126:0:30:0	unitig_0	7742069	593	N	<DEL>	.	.	SVTYPE=DEL;STRANDS=+-:37;SVLEN=-610;END=7742679;CIPOS=-2,0;CIEND=-10,9;CIPOS95=0,0;CIEND95=0,0;SU=37;PE=16;SR=21	GT:SU:PE:SR	./.:0:0:0	./.:37:16:21	./.:0:0:0	./.:0:0:0
unitig_0	7798060	7798295	-	DEL	-	-	235	0	0	1	1	0	TM1119_g2342		unitig_0	7798060	7798295	-	PM1118_GAP	-	-	unitig_0	7798055	DEL00000914	GTGGCAAGATTCATTGGTCCTGCGATTAATGGCGTGATATTCCATAAATGTAGCAGCGACCTCGACTCCTGTCGAGGCTCAATACTGAGTTTGATATGGCTGCCTCTACAGCCGGGCACAGATCTGAACAACAAGGCCCGGGGCTCTGCGCGACTGTGGCAAGCCGCTTTGGACTACATCCACAAGTTGCCCGGCTGTGAATGCTTACTCTGGGGCTACGCTCTCGGTACAGAGTCTGCAA	G	.	PASS	PRECISE;SVTYPE=DEL;SVMETHOD=EMBL.DELLYv0.7.7;CHR2=unitig_0;END=7798296;PE=0;MAPQ=60;CT=3to5;CIPOS=-5,5;CIEND=-5,5;INSLEN=0;HOMLEN=6;SR=10;SRQ=0.979592;CONSENSUS=TTATACATGAATTGTTCACAAGAACCGGGTAACACACCAGCTATCCTGTGAACCCATGGTTAGAGCACGCGGAAACATCACTCGAGAAGAAGTGGCTGACAATCCTTTCGTGCTTTCGTTGATTCAATGGAACACGGTTTCTGCATGGAAGACCTTCCAGGAGTCGGTCGGCGTGCACATAATGAACTCCGCCAAT;CE=1.99633	GT:GL:GQ:FT:RCL:RC:RCR:CN:DR:DV:RR:RV	0/0:0,-2.70815,-33.4989:27:PASS:3520:5628:3394:2:0:0:9:0	1/1:-75.2961,-3.51958,0:35:PASS:2423:133:1908:0:0:0:1:22	0/0:0,-3.31009,-40.1988:33:PASS:2811:10592:4325:3:0:0:11:0	0/0:0,-20.7623,-248.691:10000:PASS:11052:20140:9167:2:0:0:69:0	unitig_0	7798059	594	N	<DEL>	.	.	SVTYPE=DEL;STRANDS=+-:8;SVLEN=-236;END=7798295;CIPOS=-10,9;CIEND=-10,9;CIPOS95=0,0;CIEND95=0,0;SU=8;PE=0;SR=8	GT:SU:PE:SR	./.:0:0:0	./.:8:0:8	./.:0:0:0	./.:0:0:0
unitig_0	7842914	7843468	DEL	DEL	-	-	554	0	0	0	0	0			unitig_0	7842914	7843468	PA7_GAP	PM1118_GAP	-	-	unitig_0	7842909	DEL00000917	T	<DEL>	.	PASS	IMPRECISE;SVTYPE=DEL;SVMETHOD=EMBL.DELLYv0.7.7;CHR2=unitig_0;END=7843469;PE=43;MAPQ=60;CT=3to5;CIPOS=-50,50;CIEND=-50,50	GT:GL:GQ:FT:RCL:RC:RCR:CN:DR:DV:RR:RV	1/1:-219.789,-12.933,0:129:PASS:63:0:66:0:0:43:0:0	1/1:-177.4,-9.03088,0:90:PASS:57:0:43:0:0:30:0:0	0/0:0,-0.30103,-6:5:LowQual:84:88:28:2:1:0:0:0	0/0:0,-14.145,-242.097:141:PASS:180:357:189:2:47:0:0:0	unitig_0	7842908	597	N	<DEL>	.	.	SVTYPE=DEL;STRANDS=+-:14;SVLEN=-560;END=7843468;CIPOS=-10,9;CIEND=-10,9;CIPOS95=0,0;CIEND95=0,0;SU=14;PE=4;SR=10	GT:SU:PE:SR	./.:7:4:3	./.:6:0:6	./.:0:0:0	./.:1:0:1
unitig_0	7868935	7869128	-	-	-	DEL	193	0	0	0	0	0			unitig_0	7868935	7869128	-	-	-	PM449_GAP	unitig_0	7868934	DEL00000920	ACACCTCCGCCAGGATAATAAACGTTATTTTAGCGAGTTGAATATCCCAGAAAACCAGGGTTGAGAATACCTGATTGAGTTTTGAAGCTTCTGTTTATTTCTATAGCCCCGCTGGTCTCGACAAAAGTAGTAACTCCCTTGTCTGAGAAGTCACGATTCCCACTCAGAATTGACAATTATTACCCCGGCAGAG	A	.	PASS	PRECISE;SVTYPE=DEL;SVMETHOD=EMBL.DELLYv0.7.7;CHR2=unitig_0;END=7869127;PE=0;MAPQ=60;CT=3to5;CIPOS=-1,1;CIEND=-1,1;INSLEN=0;HOMLEN=0;SR=10;SRQ=0.965517;CONSENSUS=TGAGGCATCATGACTTTTAGCATTGGGGCCAGCCTGGCAAGCTGATTGAGCAAAACAACTTAACTTTCATTTCAGGTTCCTCTAGTGTAGCCATATAAACGGAGAAGCCGGCTTGCCTTTTCTTGTTCAAAATTGGTCTCCCACAGGGCCACAGCACAGCATGATAGCTTCCAT;CE=1.99488	GT:GL:GQ:FT:RCL:RC:RCR:CN:DR:DV:RR:RV	0/0:0,-6.24212,-71.6205:62:PASS:3338:4303:2583:1:0:0:21:0	0/0:0,-3.91188,-47.3985:39:PASS:2050:3116:1503:2:0:0:13:0	0/0:0,-5.71731,-68.8977:57:PASS:4493:3339:1473:1:0:0:19:0	1/1:-256.891,-21.3637,0:10000:PASS:7610:2:5410:0:0:0:0:71	unitig_0	7868934	598	N	<DEL>	.	.	SVTYPE=DEL;STRANDS=+-:34;SVLEN=-199;END=7869133;CIPOS=-1,0;CIEND=-1,0;CIPOS95=0,0;CIEND95=0,0;SU=34;PE=0;SR=34	GT:SU:PE:SR	./.:0:0:0	./.:0:0:0	./.:0:0:0	./.:34:0:34
unitig_0	8106699	8117506	DEL	-	DEL	-	10807	0	0	0	0	2		TM1119_g2432;TM1119_g2433	unitig_0	8106699	8117506	PA7_GAP	-	PM448_GAP	-	unitig_0	8106688	DEL00000946	T	<DEL>	.	PASS	PRECISE;SVTYPE=DEL;SVMETHOD=EMBL.DELLYv0.7.7;CHR2=unitig_0;END=8117507;PE=57;MAPQ=49;CT=3to5;CIPOS=-3,3;CIEND=-3,3;INSLEN=0;HOMLEN=2;SR=10;SRQ=0.965986;CONSENSUS=CGGGGAGTCGAACCCCGGGCTCATGAGAAACTCTCAACTGTGAAGCATGAGAGTCATGGATGTTACCGCTACACCACACCCGAATTTGTTGGAGGAGGAGCTTCTTATTTGATCTCTTGAGGCCTAGATGAGTCGGTGGACGGCTGG;CE=1.98813	GT:GL:GQ:FT:RCL:RC:RCR:CN:DR:DV:RR:RV	1/1:-23.6982,-2.10542,0:21:PASS:1424:29:1430:0:0:57:0:7	0/0:0,-4.51118,-51.2957:45:PASS:1993:2108:802:2:30:0:15:0	1/1:-80.1964,-6.92006,0:69:PASS:2680:10:1098:0:0:35:0:23	0/0:0,-19.2538,-225.088:10000:PASS:2727:6040:2883:2:106:0:64:0	unitig_0	8106689	603	N	<DEL>	.	.	SVTYPE=DEL;STRANDS=+-:97;SVLEN=-10817;END=8117506;CIPOS=-3,9;CIEND=-10,0;CIPOS95=-1,1;CIEND95=-1,0;IMPRECISE;SU=97;PE=94;SR=3	GT:SU:PE:SR	./.:56:56:0	./.:0:0:0	./.:41:38:3	./.:0:0:0
unitig_0	8257760	8260885	DEL	DEL	DEL	DEL	3125	0	0	0	0	0			unitig_0	8257760	8260885	PA7_GAP	PM1118_GAP	PM448_GAP	PM449_GAP	unitig_0	8257760	DEL00000959	A	<DEL>	.	PASS	IMPRECISE;SVTYPE=DEL;SVMETHOD=EMBL.DELLYv0.7.7;CHR2=unitig_0;END=8260884;PE=133;MAPQ=60;CT=3to5;CIPOS=-50,50;CIEND=-50,50	GT:GL:GQ:FT:RCL:RC:RCR:CN:DR:DV:RR:RV	1/1:-418.2,-21.674,0:10000:PASS:290:27:427:0:0:72:0:0	1/1:-797.7,-40.3378,0:10000:PASS:703:2:802:0:0:134:0:0	1/1:-790.7,-39.7359,0:10000:PASS:799:0:1118:0:0:132:0:0	1/1:-429.9,-21.6741,0:10000:PASS:724:153:735:0:0:72:0:0	unitig_0	8257759	605	N	<DEL>	.	.	SVTYPE=DEL;STRANDS=+-:602;SVLEN=-3126;END=8260885;CIPOS=0,0;CIEND=0,0;CIPOS95=0,0;CIEND95=0,0;SU=602;PE=416;SR=186	GT:SU:PE:SR	./.:84:73:11	./.:188:134:54	./.:211:135:76	./.:118:73:45
unitig_0	8300003	8300266	-	-	-	DEL	263	0	0	0	0	0			unitig_0	8300003	8300266	-	-	-	PM449_GAP	unitig_0	8299997	DEL00000962	TTTCAAAACAGCAATCATGAGGATCACTCTAGGGGCAAGTTGTGTCTGGAACAACTTGTGTAACTACGCCATATTTGTTGTCGTCAATTGAACAAACACCACGTCCCTTCTAGTACAATACGTCGCACTTATGTCAATGTTGAGCGGAGTTTTTCTTGAGAGCCAAGAACGATACGCCAGAGCTGGCAACAAATGTTAAGCACCACTGGAGAATTCAACCTCTACCGTGGAGAGACTTAGTATCAGTCAGTTGTGATGATGTCCTAGCAG	T	.	PASS	PRECISE;SVTYPE=DEL;SVMETHOD=EMBL.DELLYv0.7.7;CHR2=unitig_0;END=8300267;PE=0;MAPQ=60;CT=3to5;CIPOS=-6,6;CIEND=-6,6;INSLEN=0;HOMLEN=5;SR=10;SRQ=0.97561;CONSENSUS=AAAGGAGCCGTACTACAGAGGTTGAATCAGTCATCTGTATCTGTCTTTAGTCTTGTGCATCAGCTCGGAATTTCTCCTTTTTCAACCTGGCTGTAGAACAATCATTTATTTGGACCTTGGCTTTGTATTGGCCCAACTACTCATGAAAGACGGAACGACGCTTT;CE=1.97504	GT:GL:GQ:FT:RCL:RC:RCR:CN:DR:DV:RR:RV	0/0:0,-5.41513,-65.8966:54:PASS:3966:6034:3437:2:0:0:18:0	0/0:0,-3.91196,-47.9986:39:PASS:1921:3676:2655:2:0:0:13:0	0/0:0,-2.10634,-24.9991:21:PASS:550:3032:1041:4:0:0:7:0	1/1:-287.292,-20.6739,0:10000:PASS:10404:360:9062:0:0:0:1:79	unitig_0	8300002	607	N	<DEL>	.	.	SVTYPE=DEL;STRANDS=+-:68;SVLEN=-264;END=8300266;CIPOS=0,0;CIEND=0,0;CIPOS95=0,0;CIEND95=0,0;SU=68;PE=0;SR=68	GT:SU:PE:SR	./.:0:0:0	./.:0:0:0	./.:0:0:0	./.:68:0:68
unitig_0	8501570	8502438	-	DEL	-	-	868	0	0	0	0	0			unitig_0	8501570	8502438	-	PM1118_GAP	-	-	unitig_0	8501569	DEL00000980	A	<DEL>	.	PASS	PRECISE;SVTYPE=DEL;SVMETHOD=EMBL.DELLYv0.7.7;CHR2=unitig_0;END=8502439;PE=17;MAPQ=60;CT=3to5;CIPOS=-2,2;CIEND=-2,2;INSLEN=0;HOMLEN=1;SR=10;SRQ=1;CONSENSUS=GGCGTCTCTCTGCCGTTCTGTAATAGCACTATAGAAGTATGGACGAAGCTTGACAATATCGGACTCAAGGTTAAATTAATGACTCACGATTCTGTCGCCCGGTGCTGCCCATGATTTCTCTTGCATATCTTTTCTGACACCCGACCAGCCGTGCGTACGAAAAAGCTCCTATATAGTAGGCATCATGCCCTACCGATCCGGAT;CE=1.99293	GT:GL:GQ:FT:RCL:RC:RCR:CN:DR:DV:RR:RV	./.:0,0,0:0:LowQual:0:0:20:0:0:0:0:0	1/1:-41.8981,-3.6105,0:36:PASS:53:0:69:0:0:17:0:12	./.:0,0,0:0:LowQual:0:0:32:0:0:0:0:0	./.:0,0,0:0:LowQual:0:0:45:0:0:0:0:0	unitig_0	8501569	632	N	<DEL>	.	.	SVTYPE=DEL;STRANDS=+-:28;SVLEN=-869;END=8502438;CIPOS=-3,2;CIEND=-10,9;CIPOS95=0,0;CIEND95=0,0;SU=28;PE=18;SR=10	GT:SU:PE:SR	./.:0:0:0	./.:28:18:10	./.:0:0:0	./.:0:0:0
unitig_1	26780	29792	-	-	DEL	DEL	3012	1	0	0	1	0	TM1119_g4461		unitig_1	26780	29792	-	-	PM448_GAP	PM449_GAP	unitig_1	26781	DEL00001397	T	<DEL>	.	PASS	IMPRECISE;SVTYPE=DEL;SVMETHOD=EMBL.DELLYv0.7.7;CHR2=unitig_1;END=29793;PE=99;MAPQ=60;CT=3to5;CIPOS=-77,77;CIEND=-77,77	GT:GL:GQ:FT:RCL:RC:RCR:CN:DR:DV:RR:RV	./.:0,0,0:0:LowQual:420:727:366:2:0:0:0:0	0/0:0,-5.71893,-102.799:57:PASS:360:334:192:1:19:0:0:0	1/1:-149.4,-7.82668,0:78:PASS:488:0:83:0:0:26:0:0	1/1:-562.599,-30.1021,0:10000:PASS:814:5:622:0:0:100:0:0	unitig_1	26779	810	N	<DEL>	.	.	SVTYPE=DEL;STRANDS=+-:152;SVLEN=-3012;END=29791;CIPOS=-9,9;CIEND=0,0;CIPOS95=0,0;CIEND95=0,1;IMPRECISE;SU=152;PE=127;SR=25	GT:SU:PE:SR	./.:0:0:0	./.:0:0:0	./.:33:26:7	./.:119:101:18
unitig_1	27591	28972	-	DEL	-	-	1381	1	0	0	1	0	TM1119_g4461		unitig_1	27591	28972	-	PM1118_GAP	-	-	unitig_1	27589	DEL00001398	C	<DEL>	.	PASS	PRECISE;SVTYPE=DEL;SVMETHOD=EMBL.DELLYv0.7.7;CHR2=unitig_1;END=28973;PE=34;MAPQ=60;CT=3to5;CIPOS=-3,3;CIEND=-3,3;INSLEN=0;HOMLEN=3;SR=10;SRQ=1;CONSENSUS=TGCGGACGTTGGCGCAGGGTCGTCGTCAGGCGCGTGTCGCAAGCTGGTGAGAGCTTGTCCTGCCTCCTTCAAACAGTCAAGCTCGAGCGCTTGTCCCATATGAACGATAAGAGTGCAAGGCTTGTACTAGAATATTTGTCAATTTCACGCGTCGGGAGAAATTCGTGAGGTTGGC;CE=1.98489	GT:GL:GQ:FT:RCL:RC:RCR:CN:DR:DV:RR:RV	0/0:0,-6.01799,-73.6974:60:PASS:177:341:157:2:52:0:20:0	1/1:-85.9968,-7.22149,0:72:PASS:172:8:108:0:0:34:0:24	./.:0,0,0:0:LowQual:0:0:0:-1:0:0:0:0	./.:0,0,0:0:LowQual:3:2:0:1:0:0:0:0	unitig_1	27590	809	N	<DEL>	.	.	SVTYPE=DEL;STRANDS=+-:50;SVLEN=-1382;END=28972;CIPOS=-10,9;CIEND=-2,0;CIPOS95=0,0;CIEND95=0,0;SU=50;PE=34;SR=16	GT:SU:PE:SR	./.:0:0:0	./.:50:34:16	./.:0:0:0	./.:0:0:0
unitig_1	199817	201699	-	-	DEL	DEL	1882	0	0	0	0	0			unitig_1	199817	201699			PM448_GAP	PM449_GAP	unitig_1	199810	DEL00001408	T	<DEL>	.	PASS	PRECISE;SVTYPE=DEL;SVMETHOD=EMBL.DELLYv0.7.7;CHR2=unitig_1;END=201700;PE=71;MAPQ=60;CT=3to5;CIPOS=-7,7;CIEND=-7,7;INSLEN=0;HOMLEN=7;SR=10;SRQ=0.990566;CONSENSUS=GTTTGAGTTGTGGGAGCATGGTCTTACATCTGTAAGTTGTCAGGTGACTTATTTGCTATTACTTACTTTACTTTCACTCGCTTCATTTAGCTATGAGTACTTACAA;CE=1.90194	GT:GL:GQ:FT:RCL:RC:RCR:CN:DR:DV:RR:RV	1/1:-89.0974,-7.22215,0:72:PASS:260:234:246:1:0:71:0:24	1/1:-51.7986,-4.21306,0:42:PASS:221:23:120:0:0:13:0:14	1/1:-18.0994,-1.50456,0:15:PASS:265:3:132:0:0:20:0:5	1/1:-291.893,-23.4729,0:10000:PASS:554:15:480:0:0:104:0:78	unitig_1	199816	814	N	<DEL>	.	.	SVTYPE=DEL;STRANDS=+-:301;SVLEN=-1883;END=201699;CIPOS=0,0;CIEND=0,0;CIPOS95=0,0;CIEND95=0,0;SU=301;PE=212;SR=89	GT:SU:PE:SR	./.:89:72:17	./.:27:14:13	./.:24:20:4	./.:161:106:55
unitig_1	267423	279265	-	DEL	-	-	11842	0	1	0	1	5	TM1119_g4536	TM1119_g4537;TM1119_g4538;TM1119_g4539;TM1119_g4540;TM1119_g4541	unitig_1	267423	279265	-	PM1118_GAP	-	-	unitig_1	267425	DEL00001414	C	<DEL>	.	PASS	IMPRECISE;SVTYPE=DEL;SVMETHOD=EMBL.DELLYv0.7.7;CHR2=unitig_1;END=279265;PE=31;MAPQ=60;CT=3to5;CIPOS=-152,152;CIEND=-152,152	GT:GL:GQ:FT:RCL:RC:RCR:CN:DR:DV:RR:RV	0/0:0,-19.8671,-392.699:10000:PASS:1510:3186:1523:2:66:0:0:0	1/1:-184.6,-9.33191,0:93:PASS:1166:14:944:0:0:31:0:0	0/0:0,-6.62254,-129.6:66:PASS:1928:3866:1083:3:22:0:0:0	0/0:0,-35.5215,-706.5:10000:PASS:2934:6193:3281:2:118:0:0:0	unitig_1	267422	815	N	<DEL>	.	.	SVTYPE=DEL;STRANDS=+-:54;SVLEN=-11841;END=279263;CIPOS=-9,9;CIEND=0,0;CIPOS95=0,0;CIEND95=0,1;IMPRECISE;SU=54;PE=32;SR=22	GT:SU:PE:SR	./.:0:0:0	./.:54:32:22	./.:0:0:0	./.:0:0:0
unitig_1	305406	305858	DEL	-	DEL	-	452	0	0	0	0	0			unitig_1	305406	305858	PA7_GAP	-	PM448_GAP	-	unitig_1	305404	DEL00001419	T	<DEL>	.	PASS	PRECISE;SVTYPE=DEL;SVMETHOD=EMBL.DELLYv0.7.7;CHR2=unitig_1;END=305859;PE=74;MAPQ=60;CT=3to5;CIPOS=-2,2;CIEND=-2,2;INSLEN=0;HOMLEN=2;SR=10;SRQ=0.974359;CONSENSUS=CTATGCCAGTGGAACGCAAAGCCATGCTCCCGGGTTTCTGGCCACCCGTGATGAAATAAATGAGTTTGGGGAGGCAAGGAGAGAACATCTACCCTAGACGAAGATACGATGCTATAA;CE=1.97831	GT:GL:GQ:FT:RCL:RC:RCR:CN:DR:DV:RR:RV	1/1:-136.293,-11.4322,0:114:PASS:6466:41:5682:0:0:75:0:38	0/0:0,-4.21253,-50.4981:42:PASS:6840:9685:4440:2:26:0:14:0	1/1:-58.098,-4.81444,0:48:PASS:5322:98:2117:0:0:14:0:16	0/0:0,-12.3375,-149.695:123:PASS:17055:39945:21949:2:104:0:41:0	unitig_1	305405	816	N	<DEL>	.	.	SVTYPE=DEL;STRANDS=+-:128;SVLEN=-453;END=305858;CIPOS=0,0;CIEND=0,0;CIPOS95=0,0;CIEND95=0,0;SU=128;PE=88;SR=40	GT:SU:PE:SR	./.:101:75:26	./.:0:0:0	./.:27:13:14	./.:0:0:0
unitig_1	408849	408924	DEL	-	-	-	75	0	0	1	1	0	TM1119_g4594		unitig_1	408849	408924	PA7_GAP	-	-	-	unitig_1	408846	DEL00001426	CGACTTGACTAGGCAACATTCCGGCGTCCAGTGGCTTAGCTTCTGTCTTCTCCAGCCCCTAAGTTGTTACCGGCCACCG	C	.	PASS	PRECISE;SVTYPE=DEL;SVMETHOD=EMBL.DELLYv0.7.7;CHR2=unitig_1;END=408925;PE=0;MAPQ=60;CT=3to5;CIPOS=-3,3;CIEND=-3,3;INSLEN=0;HOMLEN=3;SR=10;SRQ=1;CONSENSUS=CCCTTCCGAAGAGTCCGCTCTTTATTCCAACGATTGTGATGCAGCCGGCGAAAGCCTGAAGAATCGGAGAGCTGACGTCGCCTTTCGGCGCAGTTTGATTCTGTCTG;CE=1.98813	GT:GL:GQ:FT:RCL:RC:RCR:CN:DR:DV:RR:RV	1/1:-67.2945,-6.0151,0:60:PASS:525:36:767:0:0:0:0:20	0/0:0,-6.92082,-83.4971:69:PASS:856:2124:1398:2:0:0:23:0	0/0:0,-10.23,-119.095:102:PASS:1283:3564:1982:2:0:0:34:0	0/0:0,-18.6551,-220.391:10000:PASS:3200:6190:3015:2:0:0:62:0	unitig_1	408848	819	N	<DEL>	.	.	SVTYPE=DEL;STRANDS=+-:12;SVLEN=-76;END=408924;CIPOS=-10,9;CIEND=-10,9;CIPOS95=0,0;CIEND95=0,0;SU=12;PE=0;SR=12	GT:SU:PE:SR	./.:12:0:12	./.:0:0:0	./.:0:0:0	./.:0:0:0
unitig_1	449254	449356	DEL	-	-	-	102	0	0	1	1	0	TM1119_g4608		unitig_1	449254	449356	PA7_GAP	-	-	-	unitig_1	449245	DEL00001427	CCTTCGCGGACTGGTTCGCCCGCCTGCGGCACAGGAGCCCGCTCTTCGCGGGCATCAACGCCGTCGGCATGCGCCTGGCCTGCACGGCGTGGGCGGCGCGGCCGGCGTGGCG	C	.	PASS	PRECISE;SVTYPE=DEL;SVMETHOD=EMBL.DELLYv0.7.7;CHR2=unitig_1;END=449357;PE=0;MAPQ=60;CT=3to5;CIPOS=-10,10;CIEND=-10,10;INSLEN=0;HOMLEN=11;SR=10;SRQ=0.98374;CONSENSUS=GGACGCCGAGATGGCCATCGGCTGCTCCGACGGGCCCGACCTGCGCGGCGAGACGCTCTCGGCCTTCGCGGGCCCCTTTGGCGGGCCGACGGCGCACCCGCTCCTGTTCGTCAGCAACGACGC;CE=1.81048	GT:GL:GQ:FT:RCL:RC:RCR:CN:DR:DV:RR:RV	1/1:-35.2957,-3.30706,0:33:PASS:995:100:594:0:0:0:0:11	0/0:0,-29.4787,-327.878:10000:PASS:7198:18762:8843:2:0:0:98:0	0/0:0,-25.2645,-278.578:10000:PASS:6102:15208:8234:2:0:0:84:0	0/0:0,-11.7319,-131.992:117:PASS:2521:7296:3756:2:0:0:39:0	unitig_1	449253	820	N	<DEL>	.	.	SVTYPE=DEL;STRANDS=+-:6;SVLEN=-103;END=449356;CIPOS=-6,5;CIEND=-6,5;CIPOS95=0,0;CIEND95=0,0;SU=6;PE=0;SR=6	GT:SU:PE:SR	./.:6:0:6	./.:0:0:0	./.:0:0:0	./.:0:0:0
unitig_1	520883	521574	-	DEL	-	-	691	0	0	0	0	0			unitig_1	520883	521574	-	PM1118_GAP	-	-	unitig_1	520880	DEL00001436	A	<DEL>	.	PASS	PRECISE;SVTYPE=DEL;SVMETHOD=EMBL.DELLYv0.7.7;CHR2=unitig_1;END=521575;PE=19;MAPQ=60;CT=3to5;CIPOS=-4,4;CIEND=-4,4;INSLEN=0;HOMLEN=3;SR=10;SRQ=0.98;CONSENSUS=ACAGGGAGGATGTGTGATAGGATCCAAAAAAAAAAAGCCGAACCCCGCCGTCCTCGATGCGGCATTGTATGTAGTCTGGCTCAAGATATCCCTCAGCTAATGATCTTGAGAGGGGCTTTACAGCAAATGAGGAATAGAATGCCCTGGTAATACTCGATCTCGCGAAGGAATATTACCATAGTAACCAGTTGCCATGGATT;CE=1.98429	GT:GL:GQ:FT:RCL:RC:RCR:CN:DR:DV:RR:RV	0/0:0,-5.71669,-68.8971:57:PASS:79:179:90:2:61:0:19:0	1/1:-37.9975,-3.30881,0:33:PASS:102:0:36:0:0:19:0:11	0/0:0,-4.81424,-56.3978:48:PASS:134:81:18:1:16:0:16:0	0/0:0,-21.9656,-263.99:10000:PASS:181:447:209:2:106:0:73:0	unitig_1	520882	824	N	<DEL>	.	.	SVTYPE=DEL;STRANDS=+-:25;SVLEN=-692;END=521574;CIPOS=-4,4;CIEND=-10,9;CIPOS95=0,0;CIEND95=0,0;SU=25;PE=19;SR=6	GT:SU:PE:SR	./.:0:0:0	./.:25:19:6	./.:0:0:0	./.:0:0:0
unitig_1	572542	573007	DEL	-	-	-	465	0	0	0	0	0			unitig_1	572542	573007	PA7_GAP	-	-	-	unitig_1	572541	DEL00001443	T	<DEL>	.	PASS	IMPRECISE;SVTYPE=DEL;SVMETHOD=EMBL.DELLYv0.7.7;CHR2=unitig_1;END=573017;PE=50;MAPQ=60;CT=3to5;CIPOS=-50,50;CIEND=-50,50	GT:GL:GQ:FT:RCL:RC:RCR:CN:DR:DV:RR:RV	1/1:-282.899,-15.0509,0:151:PASS:4900:142:8249:0:0:50:0:0	0/0:0,-0.30103,-6:5:LowQual:4332:649:70:0:1:0:0:0	0/0:0,-1.20412,-24:12:LowQual:1027:3069:4412:1:4:0:0:0	./.:0,0,0:0:LowQual:20394:5373:0:1:0:0:0:0	unitig_1	572541	826	N	<DEL>	.	.	SVTYPE=DEL;STRANDS=+-:53;SVLEN=-466;END=573007;CIPOS=-4,7;CIEND=-8,7;CIPOS95=0,0;CIEND95=0,0;SU=53;PE=49;SR=4	GT:SU:PE:SR	./.:53:49:4	./.:0:0:0	./.:0:0:0	./.:0:0:0
unitig_1	575586	575751	DEL	-	-	-	165	0	0	0	0	0			unitig_1	575586	575751	PA7_GAP	-	-	-	unitig_1	575588	DEL00001444	TATTCCAGCTGTGCGGCGTAAGCTATAGGTCCAAATGCTTGTGTGTACCTTACATTGCGCTGTAAGATGCGCGTGCACTCAGTCACTAGTGCTGTAGGATCGTGGCGCAGCTGAAAGCTGGCGACGGGAATTGTAGCAATCACTGTACAGTTGTGAACTAAGCC	T	.	PASS	PRECISE;SVTYPE=DEL;SVMETHOD=EMBL.DELLYv0.7.7;CHR2=unitig_1;END=575752;PE=0;MAPQ=60;CT=3to5;CIPOS=-2,2;CIEND=-2,2;INSLEN=0;HOMLEN=1;SR=10;SRQ=0.983871;CONSENSUS=AAGTCAATGGCTGATTCAGTCATTCAGGCTTCCGGTGAATGGGAATGATGGTCATCTTTAAATTAGACCAAATTTACGAATTTCATCGGGACGGCTCGTGCGGAATTTCCTGTGATTACATG;CE=1.97389	GT:GL:GQ:FT:RCL:RC:RCR:CN:DR:DV:RR:RV	1/1:-75.7967,-6.31837,0:63:PASS:2498:13:1646:0:0:0:0:21	./.:0,0,0:0:LowQual:0:0:0:-1:0:0:0:0	0/0:0,-7.22174,-86.297:72:PASS:1564:6422:1800:4:0:0:24:0	./.:0,0,0:0:LowQual:0:0:0:-1:0:0:0:0	unitig_1	575585	827	N	<DEL>	.	.	SVTYPE=DEL;STRANDS=+-:10;SVLEN=-166;END=575751;CIPOS=-10,9;CIEND=-10,9;CIPOS95=0,0;CIEND95=0,0;SU=10;PE=0;SR=10	GT:SU:PE:SR	./.:10:0:10	./.:0:0:0	./.:0:0:0	./.:0:0:0
unitig_1	585051	592537	-	DEL	-	-	7486	0	0	0	0	2		TM1119_g4652;TM1119_g4653	unitig_1	585051	592537	-	PM1118_GAP	-		unitig_1	585054	DEL00001446	C	<DEL>	.	PASS	IMPRECISE;SVTYPE=DEL;SVMETHOD=EMBL.DELLYv0.7.7;CHR2=unitig_1;END=592596;PE=48;MAPQ=60;CT=3to5;CIPOS=-81,81;CIEND=-81,81	GT:GL:GQ:FT:RCL:RC:RCR:CN:DR:DV:RR:RV	1/1:-268.198,-14.4471,0:144:PASS:1001:10:902:0:0:48:0:0	1/1:-76.9,-3.91338,0:39:PASS:265:37:1228:0:0:13:0:0	1/1:-102,-5.1175,0:51:PASS:602:361:1941:0:0:17:0:0	1/1:-550.2,-27.9956,0:10000:PASS:710:534:1953:0:0:93:0:0	unitig_1	585052	828	N	<DEL>	.	.	SVTYPE=DEL;STRANDS=+-:171;SVLEN=-7482;END=592534;CIPOS=-4,181;CIEND=-92,9;CIPOS95=-1,56;CIEND95=-27,3;IMPRECISE;SU=171;PE=171;SR=0	GT:SU:PE:SR	./.:48:48:0	./.:13:13:0	./.:17:17:0	./.:93:93:0
unitig_1	585052	592534	DEL	-	DEL	-	7482	0	0	0	0	2		TM1119_g4652;TM1119_g4653	unitig_1	585052	592534	PA7_GAP	-	PM448_GAP	-	unitig_1	585054	DEL00001446	C	<DEL>	.	PASS	IMPRECISE;SVTYPE=DEL;SVMETHOD=EMBL.DELLYv0.7.7;CHR2=unitig_1;END=592596;PE=48;MAPQ=60;CT=3to5;CIPOS=-81,81;CIEND=-81,81	GT:GL:GQ:FT:RCL:RC:RCR:CN:DR:DV:RR:RV	1/1:-268.198,-14.4471,0:144:PASS:1001:10:902:0:0:48:0:0	1/1:-76.9,-3.91338,0:39:PASS:265:37:1228:0:0:13:0:0	1/1:-102,-5.1175,0:51:PASS:602:361:1941:0:0:17:0:0	1/1:-550.2,-27.9956,0:10000:PASS:710:534:1953:0:0:93:0:0	unitig_1	585052	828	N	<DEL>	.	.	SVTYPE=DEL;STRANDS=+-:171;SVLEN=-7482;END=592534;CIPOS=-4,181;CIEND=-92,9;CIPOS95=-1,56;CIEND95=-27,3;IMPRECISE;SU=171;PE=171;SR=0	GT:SU:PE:SR	./.:48:48:0	./.:13:13:0	./.:17:17:0	./.:93:93:0
unitig_1	720827	721134	DEL	-	-	-	307	0	1	0	1	0	TM1119_g4705		unitig_1	720827	721134	PA7_GAP	-	-	-	unitig_1	720826	DEL00001455	T	<DEL>	.	PASS	PRECISE;SVTYPE=DEL;SVMETHOD=EMBL.DELLYv0.7.7;CHR2=unitig_1;END=721135;PE=49;MAPQ=60;CT=3to5;CIPOS=-1,1;CIEND=-1,1;INSLEN=0;HOMLEN=0;SR=10;SRQ=0.96748;CONSENSUS=ACTTTCTGGGTCAAGGCAAGCCCTTCCATCAACACGTATGTGGACATTACCAGATATTTCTGACTTACTTGGAGGACAATTTTTTGCATCATCAAACTAGACGCGAACTATCGGAACGAGTGC;CE=1.98742	GT:GL:GQ:FT:RCL:RC:RCR:CN:DR:DV:RR:RV	1/1:-58.9982,-4.81469,0:48:PASS:3105:15:4054:0:0:49:0:16	0/0:0,-4.51286,-52.6974:45:PASS:3017:5363:2000:2:18:0:15:0	0/0:0,-8.12212,-94.5943:81:PASS:4890:9465:3210:2:34:0:27:0	0/0:0,-21.9671,-266.992:10000:PASS:13726:24189:13821:2:88:0:73:0	unitig_1	720826	830	N	<DEL>	.	.	SVTYPE=DEL;STRANDS=+-:7;SVLEN=-308;END=721134;CIPOS=-5,4;CIEND=-5,4;CIPOS95=0,0;CIEND95=0,0;SU=7;PE=0;SR=7	GT:SU:PE:SR	./.:7:0:7	./.:0:0:0	./.:0:0:0	./.:0:0:0
unitig_1	801877	802052	-	-	DEL	DEL	175	0	0	0	0	0			unitig_1	801877	802052	-	-	PM448_GAP	PM449_GAP	unitig_1	801873	DEL00001460	TTTTGCCCTCATCAAATCCTAGGACCGCAACTTAGTCGGAAATAGACATTTTACTAGATTTGTCACATTCGGCTTTGCTTTACATTTACCAAGAAGAAAGGAGTAGGGAAAAATTGGCACTGATCGCAGTTTTGATATTCTTGTTAATAAATCCACTTGTACCACGCTTAGGTCG	T	.	PASS	PRECISE;SVTYPE=DEL;SVMETHOD=EMBL.DELLYv0.7.7;CHR2=unitig_1;END=802048;PE=0;MAPQ=60;CT=3to5;CIPOS=-4,4;CIEND=-4,4;INSLEN=0;HOMLEN=5;SR=10;SRQ=0.964706;CONSENSUS=CGGAGTTCTCTATGCAAATGGGGGTCATGAAATAGGGCTTTTGACGAGGATACCTGGCACCTTACAATTTCCTTTCTTTTAACCCCACTATGCTCGCTAACTTGAATACTTCCTATTAAGTAGTGGTCATTTGATGTTTTGATGATAACATAACAAGACAGAAACTTATT;CE=1.95634	GT:GL:GQ:FT:RCL:RC:RCR:CN:DR:DV:RR:RV	./.:0,0,0:0:LowQual:2511:244:0:0:0:0:0:0	./.:0,0,0:0:LowQual:1307:158:0:0:0:0:0:0	1/1:-21.1992,-1.80539,0:18:PASS:762:9:567:0:0:0:0:6	1/1:-235.793,-19.2588,0:10000:PASS:4917:100:6720:0:0:0:0:64	unitig_1	801876	834	N	<DEL>	.	.	SVTYPE=DEL;STRANDS=+-:58;SVLEN=-176;END=802052;CIPOS=0,0;CIEND=0,0;CIPOS95=0,0;CIEND95=0,0;SU=58;PE=7;SR=51	GT:SU:PE:SR	./.:4:4:0	./.:3:3:0	./.:4:0:4	./.:47:0:47
unitig_1	934981	935170	-	DEL	-	-	189	0	0	0	0	0			unitig_1	934981	935170		PM1118_GAP	-	-	unitig_1	934980	DEL00001469	CCTCCGCCCGGGTAATAGACGTTATTTTAGCGAGTTGAATATACCAGAAAACCAGGATTGAGAATACCTGATTGAGGCTTTATAGAGTCTGTTTATAACTATAGCCCCGCTAGTCTTGACAAAAGTAGCAACTCCCTTGTCTGAAAAGTCGCGATTCCCACTCAGAATTAACAAATATTACCCCGGCGGAG	C	.	PASS	PRECISE;SVTYPE=DEL;SVMETHOD=EMBL.DELLYv0.7.7;CHR2=unitig_1;END=935171;PE=0;MAPQ=60;CT=3to5;CIPOS=-2,2;CIEND=-2,2;INSLEN=0;HOMLEN=2;SR=10;SRQ=0.983051;CONSENSUS=TGAGGACTTTGATTTAGATGCGATGTCTCTCCCGTAGGCTTAAAGCTTATCCATATCTACACGTGTAGTCCACATTGTACCAGGTTGCGGATGCCTCTATATGAGAGACGTCAACAA;CE=1.9887	GT:GL:GQ:FT:RCL:RC:RCR:CN:DR:DV:RR:RV	1/1:-90.3961,-7.52184,0:75:PASS:2525:10:1760:0:0:0:0:25	1/1:-51.4978,-4.21221,0:42:PASS:1501:6:1067:0:0:0:0:14	0/0:0,-6.61967,-77.897:66:PASS:1416:3777:4327:1:0:0:22:0	0/0:0,-20.7629,-249.092:10000:PASS:9417:15310:7533:2:0:0:69:0	unitig_1	934980	836	N	<DEL>	.	.	SVTYPE=DEL;STRANDS=+-:23;SVLEN=-190;END=935170;CIPOS=-10,9;CIEND=-10,9;CIPOS95=0,0;CIEND95=0,0;SU=23;PE=0;SR=23	GT:SU:PE:SR	./.:14:0:14	./.:9:0:9	./.:0:0:0	./.:0:0:0
unitig_1	965822	975227	DEL	-	-	-	9405	0	1	0	1	2	TM1119_g4801	TM1119_g4802;TM1119_g4803	unitig_1	965822	975227	PA7_GAP	-	-	-	unitig_1	965730	DEL00001471	A	<DEL>	.	PASS	IMPRECISE;SVTYPE=DEL;SVMETHOD=EMBL.DELLYv0.7.7;CHR2=unitig_1;END=975246;PE=16;MAPQ=49;CT=3to5;CIPOS=-372,372;CIEND=-372,372	GT:GL:GQ:FT:RCL:RC:RCR:CN:DR:DV:RR:RV	1/1:-77.9997,-4.81613,0:48:PASS:1140:0:1090:0:0:16:0:0	0/0:0,-5.71956,-114:57:PASS:1897:1384:678:1:19:0:0:0	0/0:0,-12.6432,-252:126:PASS:2683:1615:965:1:42:0:0:0	0/0:0,-37.0266,-736.5:10000:PASS:2463:5032:2476:2:123:0:0:0	unitig_1	965728	838	N	<DEL>	.	.	SVTYPE=DEL;STRANDS=+-:16;SVLEN=-9517;END=975245;CIPOS=-10,519;CIEND=-485,9;CIPOS95=0,353;CIEND95=-322,1;IMPRECISE;SU=16;PE=16;SR=0	GT:SU:PE:SR	./.:16:16:0	./.:0:0:0	./.:0:0:0	./.:0:0:0
unitig_1	990200	990463	DEL	DEL	DEL	DEL	263	0	0	0	0	0			unitig_1	990200	990463	PA7_GAP	PM1118_GAP	PM448_GAP	PM449_GAP	unitig_1	990192	DEL00001473	CCTATTCTCGCTTGAGGCAAAAAAAAGCGCACTGCGTTTAACATTCACACATCTCTAAATCAAAATCTCAACCACCAAGGTATCTAAAATATCAGAAAAAAGCTTCTAAGAATACTAGACAATTCAGTGAGTTATATAGTATCTTTAAAATGCTTTGGAGACTTTATTTGCGGTTGTTATTGTCACTGGAAGTTCTGGGAAATTTTGAGGCTTGACCCAAATTGGCAGAAAACACGGGGTTTTGCGGTGCGCTTTTTTTTGCCTCAAGCGAG	C	.	PASS	PRECISE;SVTYPE=DEL;SVMETHOD=EMBL.DELLYv0.7.7;CHR2=unitig_1;END=990464;PE=0;MAPQ=60;CT=3to5;CIPOS=-10,10;CIEND=-10,10;INSLEN=0;HOMLEN=10;SR=10;SRQ=0.991379;CONSENSUS=CCAGCCAGTGAGACCCAGTTGCTTACCACCCCTGTTATTTGCCAAACCTGCCAGCTTACCTATTCTTGCCAAACACGCTTTTCAGCGTACGGCACAGTTGACTATTCGGCCAGCAT;CE=1.96326	GT:GL:GQ:FT:RCL:RC:RCR:CN:DR:DV:RR:RV	1/1:-50.7979,-4.21231,0:42:PASS:3298:111:2883:0:0:0:0:14	1/1:-79.8974,-6.62004,0:66:PASS:3753:205:2664:0:0:0:0:22	1/1:-66.6982,-5.41675,0:54:PASS:5511:160:1516:0:0:0:0:18	1/1:-242.592,-20.1607,0:10000:PASS:9334:301:10545:0:0:0:0:67	unitig_1	990199	839	N	<DEL>	.	.	SVTYPE=DEL;STRANDS=+-:96;SVLEN=-264;END=990463;CIPOS=0,0;CIEND=0,0;CIPOS95=0,0;CIEND95=0,0;SU=96;PE=0;SR=96	GT:SU:PE:SR	./.:11:0:11	./.:19:0:19	./.:8:0:8	./.:58:0:58
unitig_1	1005577	1005688	-	-	-	DEL	111	0	0	0	0	0			unitig_1	1005577	1005688	-	-	-	PM449_GAP	unitig_1	1005574	DEL00001478	AGACAAACAACCGATTTGTTGATAATGACGACACAAGCTTCTGACATTTGAAGCGGTACGAGGATTCGAGAATCCAGGCTACTTCAATAACGAATTACTACCTTTGTAGAAGTT	A	.	PASS	PRECISE;SVTYPE=DEL;SVMETHOD=EMBL.DELLYv0.7.7;CHR2=unitig_1;END=1005688;PE=0;MAPQ=60;CT=3to5;CIPOS=-4,4;CIEND=-4,4;INSLEN=0;HOMLEN=3;SR=10;SRQ=0.976471;CONSENSUS=TTTTGATTTGAGGCGCCATTGGATCGACAATCGCTCCACTGATGGCCCGGGGCGCCGACAATTATGCCGCGTCTGCTGATAAGGAGATAGACTTATAGTAATAAACAGAACCTTTGAGAGATCTTGATACGTATTACGACTGTTAGAATTGAGCATCTTCACCCTCTAGA;CE=1.99306	GT:GL:GQ:FT:RCL:RC:RCR:CN:DR:DV:RR:RV	0/0:0,-5.7167,-68.6971:57:PASS:1420:2905:1376:2:0:0:19:0	0/0:0,-6.92113,-84.1974:69:PASS:2433:3746:1002:2:0:0:23:0	0/0:0,-4.81463,-58.5982:48:PASS:2840:2038:728:1:0:0:16:0	1/1:-215.593,-17.7541,0:10000:PASS:2980:106:2927:0:0:0:0:59	unitig_1	1005576	840	N	<DEL>	.	.	SVTYPE=DEL;STRANDS=+-:42;SVLEN=-111;END=1005687;CIPOS=0,0;CIEND=0,0;CIPOS95=0,0;CIEND95=0,0;SU=42;PE=0;SR=42	GT:SU:PE:SR	./.:0:0:0	./.:0:0:0	./.:0:0:0	./.:42:0:42
unitig_1	1023713	1026113	DEL	-	DEL	-	2400	0	0	1	1	0	TM1119_g4820		unitig_1	1023713	1026113	PA7_GAP	-	PM448_GAP	-	unitig_1	1023711	DEL00001481	A	<DEL>	.	PASS	PRECISE;SVTYPE=DEL;SVMETHOD=EMBL.DELLYv0.7.7;CHR2=unitig_1;END=1026114;PE=49;MAPQ=60;CT=3to5;CIPOS=-2,2;CIEND=-2,2;INSLEN=0;HOMLEN=2;SR=10;SRQ=1;CONSENSUS=TGGGGAGAGAGACGGAAATAAGAATGAGGCTTCATCATCAGACTGGTCAATAGCAGCAAGCAATTTGTATCGCTGTCTTCGGTTCTGCGTGAATACGCCGACTGGGGTCGAA;CE=1.97696	GT:GL:GQ:FT:RCL:RC:RCR:CN:DR:DV:RR:RV	1/1:-105.994,-9.02443,0:90:PASS:314:0:310:0:0:53:0:30	0/0:0,-5.71758,-69.998:57:PASS:217:384:222:2:12:0:19:0	1/1:-72.1972,-6.01778,0:60:PASS:315:1:139:0:0:20:0:20	0/0:0,-21.9656,-263.69:10000:PASS:723:1429:456:2:118:0:73:0	unitig_1	1023712	842	N	<DEL>	.	.	SVTYPE=DEL;STRANDS=+-:110;SVLEN=-2401;END=1026113;CIPOS=-10,9;CIEND=0,0;CIPOS95=0,0;CIEND95=0,0;SU=110;PE=76;SR=34	GT:SU:PE:SR	./.:76:56:20	./.:0:0:0	./.:34:20:14	./.:0:0:0
unitig_1	1026948	1028593	-	-	-	DEL	1645	0	1	0	1	0	TM1119_g4820		unitig_1	1026948	1028593	-	-	-	PM449_GAP	unitig_1	1026948	DEL00001482	A	<DEL>	.	PASS	IMPRECISE;SVTYPE=DEL;SVMETHOD=EMBL.DELLYv0.7.7;CHR2=unitig_1;END=1028593;PE=92;MAPQ=60;CT=3to5;CIPOS=-50,50;CIEND=-50,50	GT:GL:GQ:FT:RCL:RC:RCR:CN:DR:DV:RR:RV	0/0:0,-12.9409,-215.497:129:PASS:244:294:215:1:43:0:0:0	0/0:0,-5.1175,-102:51:PASS:171:232:140:1:17:0:0:0	0/0:0,-3.31132,-63.4:33:PASS:125:138:70:1:11:0:0:0	1/1:-539.6,-27.0927,0:10000:PASS:453:0:503:0:0:90:0:0	unitig_1	1026936	845	N	<DEL>	.	.	SVTYPE=DEL;STRANDS=+-:134;SVLEN=-1657;END=1028593;CIPOS=0,0;CIEND=0,0;CIPOS95=0,0;CIEND95=0,0;SU=134;PE=95;SR=39	GT:SU:PE:SR	./.:0:0:0	./.:0:0:0	./.:0:0:0	./.:134:95:39
unitig_1	1054961	1055515	DEL	-	-	DEL	554	0	0	0	0	0			unitig_1	1054961	1055515	PA7_GAP	-	-	PM449_GAP	unitig_1	1054959	DEL00001486	C	<DEL>	.	PASS	PRECISE;SVTYPE=DEL;SVMETHOD=EMBL.DELLYv0.7.7;CHR2=unitig_1;END=1055516;PE=66;MAPQ=60;CT=3to5;CIPOS=-2,2;CIEND=-2,2;INSLEN=0;HOMLEN=1;SR=10;SRQ=0.981651;CONSENSUS=GCGACACATACTCATTTTCTTAGTAGAAACGCTCTATATGCTGAGGAGAAACCACGCGCCGGAGAAAGCTAAAGCGTTCTACCTGCGCAGTCGTGTCGACAGGCAAGCC;CE=1.98882	GT:GL:GQ:FT:RCL:RC:RCR:CN:DR:DV:RR:RV	1/1:-65.8962,-5.71578,0:57:PASS:67:0:81:0:0:64:0:19	0/0:0,-11.7342,-136.394:117:PASS:91:168:66:2:63:0:39:0	0/0:0,-15.3438,-179.291:154:PASS:93:248:101:3:81:0:51:0	1/1:-243.289,-17.862,0:10000:PASS:141:2:169:0:0:90:1:70	unitig_1	1054960	846	N	<DEL>	.	.	SVTYPE=DEL;STRANDS=+-:210;SVLEN=-555;END=1055515;CIPOS=0,0;CIEND=0,0;CIPOS95=0,0;CIEND95=0,0;SU=210;PE=155;SR=55	GT:SU:PE:SR	./.:81:68:13	./.:0:0:0	./.:0:0:0	./.:129:87:42
unitig_1	1075105	1081969	DEL	-	-	-	6864	1	0	0	1	1	TM1119_g4842	TM1119_g4841	unitig_1	1075105	1081969	PA7_GAP	-	-	-	unitig_1	1075104	DEL00001487	G	<DEL>	.	PASS	PRECISE;SVTYPE=DEL;SVMETHOD=EMBL.DELLYv0.7.7;CHR2=unitig_1;END=1081967;PE=64;MAPQ=60;CT=3to5;CIPOS=-1,1;CIEND=-1,1;INSLEN=0;HOMLEN=0;SR=10;SRQ=0.964912;CONSENSUS=CAGAAGGCAAGCAAGAAGAACCCACCGCAGTAGGAAAATATAAGGGCCATCCAGTATCTCTCCGACAAATTTCATGGTGAGAGAGTCAGCCTCCATCACAGGCAGAGATTGT;CE=1.95374	GT:GL:GQ:FT:RCL:RC:RCR:CN:DR:DV:RR:RV	1/1:-80.7973,-6.61995,0:66:PASS:840:0:851:0:0:64:0:22	0/0:0,-8.72634,-108.296:87:PASS:653:1236:666:2:28:0:29:0	0/0:0,-9.92963,-118.596:99:PASS:928:968:962:1:20:0:33:0	0/0:0,-22.2671,-268.691:10000:PASS:1885:3711:1825:2:113:0:74:0	unitig_1	1075104	848	N	<DEL>	.	.	SVTYPE=DEL;STRANDS=+-:74;SVLEN=-6870;END=1081974;CIPOS=-3,2;CIEND=-10,9;CIPOS95=0,0;CIEND95=0,0;SU=74;PE=65;SR=9	GT:SU:PE:SR	./.:74:65:9	./.:0:0:0	./.:0:0:0	./.:0:0:0
unitig_1	1077065	1080687	-	-	DEL	-	3622	0	1	0	1	0	TM1119_g4841		unitig_1	1077065	1080687	-	-	PM448_GAP	-	unitig_1	1077062	DEL00001488	G	<DEL>	.	PASS	PRECISE;SVTYPE=DEL;SVMETHOD=EMBL.DELLYv0.7.7;CHR2=unitig_1;END=1080688;PE=58;MAPQ=60;CT=3to5;CIPOS=-3,3;CIEND=-3,3;INSLEN=0;HOMLEN=3;SR=10;SRQ=0.99422;CONSENSUS=CCGTCATCTGCGCCGTGATGACCACCCCGTGTTGCTGCGAGAAGATAATACCATCGACATAATCAAGTGACAAATCAAGACCCTTCTCCTGTATCAATTGGATAGTCAGTTAGGCAGCAGTAGCGATCCTAACCGTATGCCGGCGAGAAACTTTGACGGGAGAAGTACACTGG;CE=1.99397	GT:GL:GQ:FT:RCL:RC:RCR:CN:DR:DV:RR:RV	./.:0,0,0:0:LowQual:0:0:153:0:0:0:0:0	0/0:0,-4.51302,-52.1976:45:PASS:307:625:458:2:15:0:15:0	1/1:-68.8974,-5.71692,0:57:PASS:400:6:818:0:0:57:0:19	0/0:0,-18.9577,-231.693:10000:PASS:1017:1949:962:2:112:0:63:0	unitig_1	1077064	847	N	<DEL>	.	.	SVTYPE=DEL;STRANDS=+-:71;SVLEN=-3623;END=1080687;CIPOS=-10,9;CIEND=-2,0;CIPOS95=0,0;CIEND95=0,0;SU=71;PE=58;SR=13	GT:SU:PE:SR	./.:0:0:0	./.:0:0:0	./.:71:58:13	./.:0:0:0
unitig_1	1092336	1097588	-	DEL	-	-	5252	1	0	0	1	0	TM1119_g4847 almost all		unitig_1	1092336	1097588	-	PM1118_GAP	-	-	unitig_1	1092336	DEL00001490	A	<DEL>	.	PASS	IMPRECISE;SVTYPE=DEL;SVMETHOD=EMBL.DELLYv0.7.7;CHR2=unitig_1;END=1097589;PE=12;MAPQ=60;CT=3to5;CIPOS=-148,148;CIEND=-148,148	GT:GL:GQ:FT:RCL:RC:RCR:CN:DR:DV:RR:RV	./.:0,0,0:0:LowQual:652:387:22:1:0:0:0:0	1/1:-70.4,-3.61234,0:36:PASS:484:6:312:0:0:12:0:0	./.:0,0,0:0:LowQual:663:363:49:1:0:0:0:0	./.:0,0,0:0:LowQual:1430:990:79:1:0:0:0:0	unitig_1	1092335	849	N	<DEL>	.	.	SVTYPE=DEL;STRANDS=+-:14;SVLEN=-5253;END=1097588;CIPOS=-8,9;CIEND=-10,9;CIPOS95=-1,1;CIEND95=-1,1;IMPRECISE;SU=14;PE=12;SR=2	GT:SU:PE:SR	./.:0:0:0	./.:14:12:2	./.:0:0:0	./.:0:0:0
unitig_1	1098460	1098627	-	DEL	-	-	167	0	0	0	0	0			unitig_1	1098460	1098627	-	PM1118_GAP	-	-	unitig_1	1098459	DEL00001491	GAGGAGAAAACCGTTACTAGTGTACCGCAAAATGTGGAAGACTGATTCAATGACTTGCGCGGCGGCCGGCTGTTTCCACTTATGCCACGAGGCCTGGTCGTCAAATTCGGTAAATGTTACGTAACGGTACCAGATCTGTATTCAAGAAACTTGAAGCAACCATGTAAGT	G	.	PASS	PRECISE;SVTYPE=DEL;SVMETHOD=EMBL.DELLYv0.7.7;CHR2=unitig_1;END=1098628;PE=0;MAPQ=60;CT=3to5;CIPOS=-2,2;CIEND=-2,2;INSLEN=0;HOMLEN=2;SR=10;SRQ=0.966851;CONSENSUS=TGTTTGGTACATTTTAGTCGTCGTTCGAGACTCAAGCAGTCCAATGTATGGATCGTCTAGAAGCTAAAATGCCCCAGAATAACCATAAGAGGACTCGTCACTGCACCGAGTCAGAGGAGGTATTTTGGAAGATGAATATGTTCCAGAAGCGTTGGGTTTGGGTGAATGTCTCGATTTCATCA;CE=1.97952	GT:GL:GQ:FT:RCL:RC:RCR:CN:DR:DV:RR:RV	./.:0,0,0:0:LowQual:0:0:0:-1:0:0:0:0	1/1:-73.4978,-6.01839,0:60:PASS:1124:17:1782:0:0:0:0:20	./.:0,0,0:0:LowQual:0:0:0:-1:0:0:0:0	./.:0,0,0:0:LowQual:0:0:0:-1:0:0:0:0	unitig_1	1098459	850	N	<DEL>	.	.	SVTYPE=DEL;STRANDS=+-:16;SVLEN=-168;END=1098627;CIPOS=-2,1;CIEND=-2,1;CIPOS95=0,0;CIEND95=0,0;SU=16;PE=0;SR=16	GT:SU:PE:SR	./.:0:0:0	./.:16:0:16	./.:0:0:0	./.:0:0:0
unitig_1	1101167	1101904	-	-	DEL	DEL	737	0	0	1	1	0	TM1119_g4848		unitig_1	1101167	1101904	-	-	PM448_GAP	PM449_GAP	unitig_1	1101163	DEL00001492	T	<DEL>	.	PASS	IMPRECISE;SVTYPE=DEL;SVMETHOD=EMBL.DELLYv0.7.7;CHR2=unitig_1;END=1101905;PE=34;MAPQ=55;CT=3to5;CIPOS=-50,50;CIEND=-50,50	GT:GL:GQ:FT:RCL:RC:RCR:CN:DR:DV:RR:RV	0/0:0,-8.0433,-116.514:80:PASS:88:169:66:2:28:0:0:0	0/0:0,-7.22471,-144:72:PASS:69:106:56:2:24:0:0:0	1/1:-128.097,-7.22171,0:72:PASS:81:0:34:0:0:24:0:0	1/1:-157.67,-9.60271,0:96:PASS:178:0:152:0:0:32:0:0	unitig_1	1101162	851	N	<DEL>	.	.	SVTYPE=DEL;STRANDS=+-:93;SVLEN=-741;END=1101903;CIPOS=-10,9;CIEND=0,0;CIPOS95=0,0;CIEND95=0,1;IMPRECISE;SU=93;PE=67;SR=26	GT:SU:PE:SR	./.:0:0:0	./.:0:0:0	./.:32:24:8	./.:61:43:18
unitig_1	1258664	1258905	DEL	DEL	-	DEL	241	0	0	0	0	0			unitig_1	1258664	1258905	PA7_GAP	PM1118_GAP	-	PM449_GAP	unitig_1	1258663	DEL00001507	GACCTCAGTATCAAGGTGAAGTGAGCTACGGTATTTTGGGAAGCATCGAGTTGCTCTCAACTGGACTGAGAAGTGAGCGGCCTGTATGGTGAAGAACAGCTCATTTGCCTCGTGTCGCTTTCACTAGAGCCAGGGTTGCATCTTCAGGCCATGAAAGCTGTCGCTGTCGCTGCCGCTGTCGCTGTCGCTCGTCTCTACACCTTGAGATGGCCTTATATCGCCGTCTCGGCTTGTTCCTAGACA	G	.	PASS	PRECISE;SVTYPE=DEL;SVMETHOD=EMBL.DELLYv0.7.7;CHR2=unitig_1;END=1258906;PE=0;MAPQ=60;CT=3to5;CIPOS=-2,2;CIEND=-2,2;INSLEN=0;HOMLEN=1;SR=10;SRQ=0.990654;CONSENSUS=CTACGAGAGTTGACATGCGAGTGGTGTCGGTCTGACCTACACTACTACACTTCAGGCCATATCTCTGTGTGCCTTCCTCGGGCTACGTATGCCTGTCTGTCAATCTGCAGTGAAAACGAGGGTAAAGGCTTGTCATACATCATCTTCTCTAAGGCGCCTTTACTCGAGTCGATCTGTCGATGCCTGTTTCTGATCGAACGGGAGGGATGCTGTT;CE=1.98702	GT:GL:GQ:FT:RCL:RC:RCR:CN:DR:DV:RR:RV	1/1:-58.5982,-4.81469,0:48:PASS:2618:10:2531:0:0:0:0:16	1/1:-56.4987,-4.51412,0:45:PASS:2489:160:2730:0:0:0:0:15	0/0:0,-12.9383,-151.894:129:PASS:5440:12805:5570:2:0:0:43:0	1/1:-187.594,-15.3468,0:154:PASS:5937:37:7479:0:0:0:0:51	unitig_1	1258663	855	N	<DEL>	.	.	SVTYPE=DEL;STRANDS=+-:48;SVLEN=-242;END=1258905;CIPOS=0,0;CIEND=0,0;CIPOS95=0,0;CIEND95=0,0;SU=48;PE=0;SR=48	GT:SU:PE:SR	./.:5:0:5	./.:10:0:10	./.:0:0:0	./.:33:0:33
unitig_1	1619665	1619751	DEL	-	-	-	86	0	0	0	0	0			unitig_1	1619665	1619751	PA7_GAP	-	-	-	unitig_1	1619663	DEL00001530	GTACTCGCGCGGTTACACATAGTCATGAGAGTGCTAAGCGCCTTTAGTAGGAAGACAGTCTGTTACTTCTAGCAATATAGATAGCAGAT	G	.	PASS	PRECISE;SVTYPE=DEL;SVMETHOD=EMBL.DELLYv0.7.7;CHR2=unitig_1;END=1619752;PE=0;MAPQ=60;CT=3to5;CIPOS=-3,3;CIEND=-3,3;INSLEN=0;HOMLEN=2;SR=10;SRQ=1;CONSENSUS=AGTTCTCCTTCAAAGCTGGACCAACACAGAGGATTCGAGACAAGACAGCGACGTGAAGTCCAGGATGTGAAGGTTATTTAAAGAGTCCCAACAGCAGAAGAGAAATTGCT;CE=1.95333	GT:GL:GQ:FT:RCL:RC:RCR:CN:DR:DV:RR:RV	1/1:-83.7963,-6.92003,0:69:PASS:979:36:894:0:0:0:0:23	0/0:0,-4.21189,-51.2975:42:PASS:899:1293:798:2:0:0:14:0	./.:0,0,0:0:LowQual:0:0:0:-1:0:0:0:0	./.:0,0,0:0:LowQual:0:0:0:-1:0:0:0:0	unitig_1	1619664	861	N	<DEL>	.	.	SVTYPE=DEL;STRANDS=+-:14;SVLEN=-87;END=1619751;CIPOS=-10,9;CIEND=-10,9;CIPOS95=0,0;CIEND95=0,0;SU=14;PE=0;SR=14	GT:SU:PE:SR	./.:14:0:14	./.:0:0:0	./.:0:0:0	./.:0:0:0
unitig_1	2246896	2250781	-	DEL	-	DEL	3885	0	0	0	0	1		TM1119_g5189	unitig_1	2246896	2250781	-	PM1118_GAP	-	PM449_GAP	unitig_1	2246888	DEL00001576	G	<DEL>	.	PASS	PRECISE;SVTYPE=DEL;SVMETHOD=EMBL.DELLYv0.7.7;CHR2=unitig_1;END=2250782;PE=65;MAPQ=60;CT=3to5;CIPOS=-9,9;CIEND=-9,9;INSLEN=0;HOMLEN=9;SR=10;SRQ=1;CONSENSUS=TGATAGTTGAAGTGAGAACGCAACCCCAAGAAGCCCCCGACTCGACAGTTTCTTATCATACACGGGTAGCTGTACAAGACTGACAAGAGAAAAAGAGAGAGAATGGTGACTTTACCACATTCATTCTCACCTTATGCAGCATGCGGAACTTTATGGCGTGCTCTGCGG;CE=1.98921	GT:GL:GQ:FT:RCL:RC:RCR:CN:DR:DV:RR:RV	0/0:0,-2.10632,-25.4991:21:PASS:394:777:360:2:0:0:7:0	1/1:-106.396,-9.02665,0:90:PASS:401:10:797:0:0:65:0:30	0/0:0,-11.1321,-129.694:111:PASS:642:1488:1060:2:86:0:37:0	1/1:-211.194,-17.1528,0:10000:PASS:1041:1:932:0:0:76:0:57	unitig_1	2246895	865	N	<DEL>	.	.	SVTYPE=DEL;STRANDS=+-:211;SVLEN=-3886;END=2250781;CIPOS=0,0;CIEND=0,0;CIPOS95=0,0;CIEND95=0,0;SU=211;PE=141;SR=70	GT:SU:PE:SR	./.:0:0:0	./.:93:65:28	./.:0:0:0	./.:118:76:42
unitig_1	2804984	2807619	DEL	-	DEL	DEL	2635	1	0	0	1	0	TM1119_g5352		unitig_1	2804984	2807619	PA7_GAP	-	PM448_GAP	PM449_GAP	unitig_1	2804983	DEL00001615	G	<DEL>	.	PASS	PRECISE;SVTYPE=DEL;SVMETHOD=EMBL.DELLYv0.7.7;CHR2=unitig_1;END=2807620;PE=38;MAPQ=60;CT=3to5;CIPOS=-3,3;CIEND=-3,3;INSLEN=0;HOMLEN=2;SR=10;SRQ=0.99115;CONSENSUS=CTACCTCACTGATGTCCCAACGTAGTTAGTCAAAGCCGCTGCTTTCCTCAGGCCCAGCTCAGGAATTCCCGTGTCGGATTAAATGGATAAAACACAGACAAGAATGTTTTACT;CE=1.98659	GT:GL:GQ:FT:RCL:RC:RCR:CN:DR:DV:RR:RV	1/1:-53.5976,-4.51305,0:45:PASS:243:0:268:0:0:38:0:15	0/0:0,-6.01735,-69.8968:60:PASS:188:407:168:2:35:0:20:0	1/1:-25.1991,-2.10635,0:21:PASS:212:0:258:0:0:15:0:7	1/1:-202.594,-16.5502,0:10000:PASS:749:0:849:0:0:87:0:55	unitig_1	2804983	869	N	<DEL>	.	.	SVTYPE=DEL;STRANDS=+-:194;SVLEN=-2636;END=2807619;CIPOS=0,0;CIEND=0,0;CIPOS95=0,0;CIEND95=0,0;SU=194;PE=140;SR=54	GT:SU:PE:SR	./.:46:38:8	./.:0:0:0	./.:22:15:7	./.:126:87:39
unitig_1	2838021	2838225	-	-	DEL	DEL	204	0	0	0	0	0			unitig_1	2838021	2838225		-	PM448_GAP	PM449_GAP	unitig_1	2838015	DEL00001618	TACAACTATAATAGGGTTTCCTTTTTAAGGAGGCTAGGTAGGTTAAGATAGATGGAAGTAGGTACTTGATTGATTATAAGACTGAACCTTATAGAGTGGTAAAACTCTATACTTGCTAAGGAGGCTATATAGCTCATATATCGCCTGTGTGGCAGTGGTGGCTAGGCACAGTGGCCAGCCATATCGGGGTGCCGAACAGCCCCCCTTTACA	T	.	PASS	PRECISE;SVTYPE=DEL;SVMETHOD=EMBL.DELLYv0.7.7;CHR2=unitig_1;END=2838226;PE=0;MAPQ=60;CT=3to5;CIPOS=-7,7;CIEND=-7,7;INSLEN=0;HOMLEN=8;SR=10;SRQ=0.972727;CONSENSUS=TAGCCCTTCGGAATTGCTCGATTTCATTAGCAAGTGATATGGGGCGATTCGATGCATACAACAAATATATGCGTTTCCCGAAAGTTGCCCTGAGCATTTTGCCTTTGTCG;CE=1.98252	GT:GL:GQ:FT:RCL:RC:RCR:CN:DR:DV:RR:RV	1/1:-84.8953,-7.22003,0:72:PASS:2269:16218:1855:8:0:0:0:24	0/0:0,-3.6106,-42.7982:36:PASS:1743:7566:1812:4:0:0:12:0	1/1:-34.9984,-3.00869,0:30:PASS:990:19219:1999:13:0:0:0:10	1/1:-220.193,-18.0553,0:10000:PASS:8387:48185:7974:6:0:0:0:60	unitig_1	2838020	872	N	<DEL>	.	.	SVTYPE=DEL;STRANDS=+-:66;SVLEN=-205;END=2838225;CIPOS=0,0;CIEND=0,0;CIPOS95=0,0;CIEND95=0,0;SU=66;PE=0;SR=66	GT:SU:PE:SR	./.:12:0:12	./.:0:0:0	./.:8:0:8	./.:46:0:46
unitig_1	3244497	3249720	DEL	-	DEL	DEL	5223	0	0	0	0	1		TM1119_g5491	unitig_1	3244497	3249720	PA7_GAP	-	PM448_GAP	PM449_GAP	unitig_1	3244497	DEL00001634	A	<DEL>	.	PASS	IMPRECISE;SVTYPE=DEL;SVMETHOD=EMBL.DELLYv0.7.7;CHR2=unitig_1;END=3249726;PE=43;MAPQ=60;CT=3to5;CIPOS=-50,50;CIEND=-50,50	GT:GL:GQ:FT:RCL:RC:RCR:CN:DR:DV:RR:RV	1/1:-268.999,-14.1478,0:141:PASS:583:22:531:0:0:47:0:0	0/0:0,-4.81647,-96:48:PASS:404:865:825:1:16:0:0:0	1/1:-60,-3.0103,0:30:PASS:404:69:996:0:0:10:0:0	1/1:-612,-30.705,0:10000:PASS:1674:60:1428:0:0:102:0:0	unitig_1	3244496	875	N	<DEL>	.	.	SVTYPE=DEL;STRANDS=+-:212;SVLEN=-5229;END=3249725;CIPOS=0,0;CIEND=0,0;CIPOS95=0,0;CIEND95=0,0;SU=212;PE=159;SR=53	GT:SU:PE:SR	./.:52:47:5	./.:0:0:0	./.:18:10:8	./.:142:102:40
unitig_1	4379149	4379347	-	DEL	-	-	198	0	0	0	0	0			unitig_1	4379149	4379347	-	PM1118_GAP	-	-	unitig_1	4379143	DEL00001717	CACATGTACCAACAAGTTGCAAAGTAGCCTCATTAGACAGCGAGTCTGGCAATCTAAGTCACTAGACATGAACCGAGAGGCATAGAAGATCTACAGTACCTAGGTAGTCTTATCTGCTAACGATGGTCCCGTCGGATAGCGCAGCTTCCCCCGGTACCTGCCCAAGACACTTGTTGGCCCGTTTCTCTTCCTAGAATCCAGT	C	.	PASS	PRECISE;SVTYPE=DEL;SVMETHOD=EMBL.DELLYv0.7.7;CHR2=unitig_1;END=4379345;PE=0;MAPQ=60;CT=3to5;CIPOS=-5,5;CIEND=-5,5;INSLEN=0;HOMLEN=5;SR=10;SRQ=0.979275;CONSENSUS=GCCTGTCAATTGAATTGACCCCAACTCGACTCAGTGGAGCGAGCCAACAGTTCGAAAACCCCCGGTTCTAGGGTTTTTGTTCTCGTCCTGGGCGCATGACACAGCATTTCAAAATCTCTCCAGCTAGCAACCCTATCAATAGACATCTAAGAATCGAGCGGCTTACTTGATGGATGTTCTAACAAAGAAACG;CE=1.99121	GT:GL:GQ:FT:RCL:RC:RCR:CN:DR:DV:RR:RV	1/1:-38.9984,-3.30969,0:33:PASS:1297:3:2219:0:0:0:0:11	1/1:-66.398,-2.51851,0:25:PASS:2653:145:2741:0:0:0:1:19	0/0:0,-7.22076,-84.596:72:PASS:4233:7442:2787:2:0:0:24:0	0/0:0,-9.92908,-117.295:99:PASS:8490:16340:8516:2:0:0:33:0	unitig_1	4379140	890	N	<DEL>	.	.	SVTYPE=DEL;STRANDS=+-:17;SVLEN=-207;END=4379347;CIPOS=-10,9;CIEND=-10,9;CIPOS95=0,0;CIEND95=0,0;SU=17;PE=0;SR=17	GT:SU:PE:SR	./.:4:0:4	./.:13:0:13	./.:0:0:0	./.:0:0:0
unitig_1	4379149	4379348	DEL	-	-	-	199	0	0	0	0	0			unitig_1	4379149	4379348	PA7_GAP	-	-	-	unitig_1	4379143	DEL00001717	CACATGTACCAACAAGTTGCAAAGTAGCCTCATTAGACAGCGAGTCTGGCAATCTAAGTCACTAGACATGAACCGAGAGGCATAGAAGATCTACAGTACCTAGGTAGTCTTATCTGCTAACGATGGTCCCGTCGGATAGCGCAGCTTCCCCCGGTACCTGCCCAAGACACTTGTTGGCCCGTTTCTCTTCCTAGAATCCAGT	C	.	PASS	PRECISE;SVTYPE=DEL;SVMETHOD=EMBL.DELLYv0.7.7;CHR2=unitig_1;END=4379345;PE=0;MAPQ=60;CT=3to5;CIPOS=-5,5;CIEND=-5,5;INSLEN=0;HOMLEN=5;SR=10;SRQ=0.979275;CONSENSUS=GCCTGTCAATTGAATTGACCCCAACTCGACTCAGTGGAGCGAGCCAACAGTTCGAAAACCCCCGGTTCTAGGGTTTTTGTTCTCGTCCTGGGCGCATGACACAGCATTTCAAAATCTCTCCAGCTAGCAACCCTATCAATAGACATCTAAGAATCGAGCGGCTTACTTGATGGATGTTCTAACAAAGAAACG;CE=1.99121	GT:GL:GQ:FT:RCL:RC:RCR:CN:DR:DV:RR:RV	1/1:-38.9984,-3.30969,0:33:PASS:1297:3:2219:0:0:0:0:11	1/1:-66.398,-2.51851,0:25:PASS:2653:145:2741:0:0:0:1:19	0/0:0,-7.22076,-84.596:72:PASS:4233:7442:2787:2:0:0:24:0	0/0:0,-9.92908,-117.295:99:PASS:8490:16340:8516:2:0:0:33:0	unitig_1	4379140	890	N	<DEL>	.	.	SVTYPE=DEL;STRANDS=+-:17;SVLEN=-207;END=4379347;CIPOS=-10,9;CIEND=-10,9;CIPOS95=0,0;CIEND95=0,0;SU=17;PE=0;SR=17	GT:SU:PE:SR	./.:4:0:4	./.:13:0:13	./.:0:0:0	./.:0:0:0
unitig_1	4415783	4418859	-	DEL	DEL	DEL	3076	0	0	0	0	1		TM1119_g5836	unitig_1	4415783	4418859	-	PM1118_GAP	PM448_GAP	PM449_GAP	unitig_1	4415774	DEL00001719	T	<DEL>	.	PASS	PRECISE;SVTYPE=DEL;SVMETHOD=EMBL.DELLYv0.7.7;CHR2=unitig_1;END=4418860;PE=28;MAPQ=60;CT=3to5;CIPOS=-9,9;CIEND=-9,9;INSLEN=0;HOMLEN=8;SR=10;SRQ=1;CONSENSUS=GGGAACTCTCATTCACTGCTACTTGATGTTTTGGTATCGTACCAACTTCCTTTGGTGGGCGTATAATATCATCCCGACAGCAGCTTCTTGAAGGTAACCCCTGTAGGAGTGGATGGCACCTGCCGGTTGCACTACTAAACGGAGGAGGCAGTTGCGGCGCCGTTTGTTTGAGCGTTGACTA;CE=1.9869	GT:GL:GQ:FT:RCL:RC:RCR:CN:DR:DV:RR:RV	1/1:-36.0978,-3.0081,0:30:PASS:445:0:437:0:0:67:0:10	1/1:-54.2984,-2.2154,0:22:PASS:334:2:718:0:0:27:1:16	1/1:-131.894,-11.1318,0:111:PASS:488:0:1016:0:0:46:0:37	1/1:-194.191,-16.5478,0:10000:PASS:860:0:786:0:0:73:0:55	unitig_1	4415782	891	N	<DEL>	.	.	SVTYPE=DEL;STRANDS=+-:314;SVLEN=-3077;END=4418859;CIPOS=0,0;CIEND=0,0;CIPOS95=0,0;CIEND95=0,0;SU=314;PE=218;SR=96	GT:SU:PE:SR	./.:75:67:8	./.:39:28:11	./.:75:46:29	./.:123:76:47
unitig_1	4415783	4418866	DEL	-	-	-	3083	0	0	0	0	1		TM1119_g5836	unitig_1	4415783	4418866	PA7_GAP	-	-	-	unitig_1	4415774	DEL00001719	T	<DEL>	.	PASS	PRECISE;SVTYPE=DEL;SVMETHOD=EMBL.DELLYv0.7.7;CHR2=unitig_1;END=4418860;PE=28;MAPQ=60;CT=3to5;CIPOS=-9,9;CIEND=-9,9;INSLEN=0;HOMLEN=8;SR=10;SRQ=1;CONSENSUS=GGGAACTCTCATTCACTGCTACTTGATGTTTTGGTATCGTACCAACTTCCTTTGGTGGGCGTATAATATCATCCCGACAGCAGCTTCTTGAAGGTAACCCCTGTAGGAGTGGATGGCACCTGCCGGTTGCACTACTAAACGGAGGAGGCAGTTGCGGCGCCGTTTGTTTGAGCGTTGACTA;CE=1.9869	GT:GL:GQ:FT:RCL:RC:RCR:CN:DR:DV:RR:RV	1/1:-36.0978,-3.0081,0:30:PASS:445:0:437:0:0:67:0:10	1/1:-54.2984,-2.2154,0:22:PASS:334:2:718:0:0:27:1:16	1/1:-131.894,-11.1318,0:111:PASS:488:0:1016:0:0:46:0:37	1/1:-194.191,-16.5478,0:10000:PASS:860:0:786:0:0:73:0:55	unitig_1	4415782	891	N	<DEL>	.	.	SVTYPE=DEL;STRANDS=+-:314;SVLEN=-3077;END=4418859;CIPOS=0,0;CIEND=0,0;CIPOS95=0,0;CIEND95=0,0;SU=314;PE=218;SR=96	GT:SU:PE:SR	./.:75:67:8	./.:39:28:11	./.:75:46:29	./.:123:76:47
unitig_1	4552140	4554618	-	-	DEL	-	2478	1	0	0	1	1	TM1119_g5877	TM1119_g5876	unitig_1	4552140	4554618	-	-	PM448_GAP	-	unitig_1	4552139	DEL00001727	T	<DEL>	.	PASS	PRECISE;SVTYPE=DEL;SVMETHOD=EMBL.DELLYv0.7.7;CHR2=unitig_1;END=4554619;PE=73;MAPQ=48;CT=3to5;CIPOS=-2,2;CIEND=-2,2;INSLEN=0;HOMLEN=2;SR=10;SRQ=0.975758;CONSENSUS=AAGGCAATGAGCCCGCGCTCGCTGCAGAGACATTGGCCCTTACAAAAGCGGCCAAGATCATGCTATCAGGGAATTTGAGTCGGGGTGGCAGTCTCTCGGGACGTCGCCTCGTCGGGAGGGAATGGTGTTTGAGATGCAGAAGTGCCGCCGGGATGAGGATTTAC;CE=1.96463	GT:GL:GQ:FT:RCL:RC:RCR:CN:DR:DV:RR:RV	0/0:0,-5.41548,-64.9969:54:PASS:306:605:303:2:53:0:18:0	0/0:0,-9.62839,-112.695:96:PASS:250:487:253:2:31:0:32:0	1/1:-253.054,-23.7355,0:10000:PASS:460:0:337:0:0:74:0:79	0/0:0,-8.12331,-94.6955:81:PASS:743:1211:586:2:111:0:27:0	unitig_1	4552139	897	N	<DEL>	.	.	SVTYPE=DEL;STRANDS=+-:125;SVLEN=-2479;END=4554618;CIPOS=0,0;CIEND=0,0;CIPOS95=0,0;CIEND95=0,0;SU=125;PE=76;SR=49	GT:SU:PE:SR	./.:0:0:0	./.:0:0:0	./.:125:76:49	./.:0:0:0
unitig_1	4626442	4626616	-	DEL	-	-	174	0	0	0	0	0			unitig_1	4626442	4626616		PM1118_GAP			unitig_1	4626435	DEL00001731	TCACTGTGTGACAAAAGAGAGCCCCGCTAAGCCTAGTGGTAAGCTCCTTGGCCCCTGACAGGGGTCAATTCAGTATATATATGGTGTGAGAGCACCCCAATTCTCTTTTGTATGATCTATATAGTTCAATGAACTTTCCATTACCCAATTACATGCTCGTACGCGCTCTACGGTCCGTCACA	T	.	PASS	PRECISE;SVTYPE=DEL;SVMETHOD=EMBL.DELLYv0.7.7;CHR2=unitig_1;END=4626617;PE=0;MAPQ=60;CT=3to5;CIPOS=-7,7;CIEND=-7,7;INSLEN=0;HOMLEN=6;SR=10;SRQ=0.990654;CONSENSUS=CAATGTACTATTAAATCAACAAAGGAAGAGCTATTTGCTGTCACTGTCATGAGATGCGATATGCCGATGCACGAACCCAACACGGCTGCTACACGGATGGATGGGCC;CE=1.98619	GT:GL:GQ:FT:RCL:RC:RCR:CN:DR:DV:RR:RV	1/1:-52.9971,-4.5126,0:45:PASS:1650:4123:1737:2:0:0:0:15	1/1:-88.7963,-7.52202,0:75:PASS:1568:87:3124:0:0:0:0:25	1/1:-63.8985,-5.11603,0:51:PASS:1277:68:1277:0:0:0:0:17	1/1:-279.49,-23.1696,0:10000:PASS:6893:9449:6183:1:0:0:0:77	unitig_1	4626441	899	N	<DEL>	.	.	SVTYPE=DEL;STRANDS=+-:110;SVLEN=-175;END=4626616;CIPOS=0,0;CIEND=0,0;CIPOS95=0,0;CIEND95=0,0;SU=110;PE=0;SR=110	GT:SU:PE:SR	./.:10:0:10	./.:21:0:21	./.:13:0:13	./.:66:0:66
unitig_1	4642743	4643051	-	-	-	DEL	308	0	0	0	0	0			unitig_1	4642743	4643051	-	-	PM448_GAP	PM449_GAP	unitig_1	4642742	DEL00001735	A	<DEL>	.	PASS	IMPRECISE;SVTYPE=DEL;SVMETHOD=EMBL.DELLYv0.7.7;CHR2=unitig_1;END=4643052;PE=52;MAPQ=60;CT=3to5;CIPOS=-50,50;CIEND=-50,50	GT:GL:GQ:FT:RCL:RC:RCR:CN:DR:DV:RR:RV	0/0:0,-9.62575,-164.793:96:PASS:3825:5966:4375:1:32:0:0:0	0/0:0,-2.70921,-51.8999:27:PASS:2325:2598:3696:1:9:0:0:0	1/1:-59.2,-3.01029,0:30:PASS:408:13:4218:0:0:10:0:0	1/1:-313.4,-15.9546,0:10000:PASS:10906:21:6807:0:0:53:0:0	unitig_1	4642742	903	N	<DEL>	.	.	SVTYPE=DEL;STRANDS=+-:25;SVLEN=-309;END=4643051;CIPOS=-10,9;CIEND=-1,0;CIPOS95=0,0;CIEND95=0,0;SU=25;PE=2;SR=23	GT:SU:PE:SR	./.:0:0:0	./.:0:0:0	./.:1:0:1	./.:24:2:22
unitig_1	4747447	4747560	-	DEL	-	-	113	0	0	0	0	0			unitig_1	4747447	4747560	-	PM1118_GAP	-	-	unitig_1	4747446	DEL00001748	ACTGGTAGCTTTGGACTTATACGGCTTTATCTCTATTGTTATGTCTCAAGTTCAGGATCCCACTGGAACATCCGTTCAAATTATGATTACATGCATCTGAACGAAGAGGCTACTG	A	.	PASS	PRECISE;SVTYPE=DEL;SVMETHOD=EMBL.DELLYv0.7.7;CHR2=unitig_1;END=4747561;PE=0;MAPQ=60;CT=3to5;CIPOS=-2,2;CIEND=-2,2;INSLEN=0;HOMLEN=1;SR=10;SRQ=0.962366;CONSENSUS=GACGATGACGCCGCGGAGTCAAGACATCGGACCAAGCAGGGCCCCTTGCTGCTCGCATGACTCTTTCAAGAGCCGTGATTAAGATCCCTTGTTGACGTAGACGCACTATTGCTTCGGCGGGGCCGCAGTCAGCAAGTCGTCGAACCCATCTCCATCTAGGCCGGCGTTAGAAGGCGCCGAG;CE=1.97499	GT:GL:GQ:FT:RCL:RC:RCR:CN:DR:DV:RR:RV	0/0:0,-1.80539,-21.9992:18:PASS:1467:2948:1184:2:0:0:6:0	1/1:-159.694,-13.5399,0:135:PASS:1818:30:2136:0:0:0:0:45	0/0:0,-18.0537,-215.692:10000:PASS:3939:7650:4657:2:0:0:60:0	0/0:0,-17.452,-211.492:10000:PASS:4121:8733:3530:2:0:0:58:0	unitig_1	4747446	906	N	<DEL>	.	.	SVTYPE=DEL;STRANDS=+-:18;SVLEN=-114;END=4747560;CIPOS=-2,1;CIEND=-2,1;CIPOS95=0,0;CIEND95=0,0;SU=18;PE=0;SR=18	GT:SU:PE:SR	./.:0:0:0	./.:18:0:18	./.:0:0:0	./.:0:0:0
unitig_1	4832835	4833278	-	-	-	DEL	443	0	0	0	0	0			unitig_1	4832835	4833278	-	-	-	PM449_GAP	unitig_1	4832834	DEL00001756	A	<DEL>	.	PASS	PRECISE;SVTYPE=DEL;SVMETHOD=EMBL.DELLYv0.7.7;CHR2=unitig_1;END=4833284;PE=89;MAPQ=60;CT=3to5;CIPOS=-5,5;CIEND=-5,5;INSLEN=0;HOMLEN=4;SR=10;SRQ=1;CONSENSUS=CGATTGTCAAACCAGCAATAGTGGCAAGTAGATCGATGCATATCTCGCCGCCTGTCCTGAATACCCCGTGTTGACGTCATACCATGGGCCCGAAGCCATGAGGTTCTTGGTTTATTTCAGTAGGACTCGAGGTAATTGGGGTCCTTGGATGCTTCT;CE=1.99311	GT:GL:GQ:FT:RCL:RC:RCR:CN:DR:DV:RR:RV	./.:0,0,0:0:LowQual:4801:7108:4945:1:44:0:0:0	0/0:0,-3.61092,-43.9986:36:PASS:4055:7089:5024:2:14:0:12:0	0/0:0,-4.21294,-51.5985:42:PASS:6342:9449:5028:2:30:1:14:0	1/1:-304.189,-25.2758,0:10000:PASS:19858:217:18620:0:0:90:0:84	unitig_1	4832834	884	N	<DEL>	.	.	SVTYPE=DEL;STRANDS=+-:113;SVLEN=-449;END=4833283;CIPOS=0,0;CIEND=0,0;CIPOS95=0,0;CIEND95=0,0;SU=113;PE=49;SR=64	GT:SU:PE:SR	./.:0:0:0	./.:0:0:0	./.:1:1:0	./.:112:48:64
unitig_1	4866400	4866489	-	DEL	-	-	89	0	0	0	0	0			unitig_1	4866400	4866489	-	PM1118_GAP	-	-	unitig_1	4866399	DEL00001758	TGATCGACTCGTTATTACGGCGGTTGCAGGCCAAAGTTTGGGCGCCACCGTCAGGTATTTTCGAGCCACCATTACAGCGCACAGACCAGGG	T	.	PASS	PRECISE;SVTYPE=DEL;SVMETHOD=EMBL.DELLYv0.7.7;CHR2=unitig_1;END=4866490;PE=0;MAPQ=60;CT=3to5;CIPOS=-1,1;CIEND=-1,1;INSLEN=0;HOMLEN=0;SR=10;SRQ=0.966825;CONSENSUS=CTCTGGAGACGTCTACAATAAACATAAGGGTGCATGTGTGAGGCAGTATGGCCTTTCAATATGAGCCTGTTAGGTGTTCGAAGAAAGCTGGCCGGGGGTCAGCCATACTTCAGCGCACTCAGAGTGGACCTTTGGCCGCTGTCATTGTTTTTCTACCTGGCCCACAGGCGTCACTTACCCATACTACCATAGTAGCGCTGTTGTATCATA;CE=1.99705	GT:GL:GQ:FT:RCL:RC:RCR:CN:DR:DV:RR:RV	./.:0,0,0:0:LowQual:0:0:0:-1:0:0:0:0	1/1:-65.898,-5.41656,0:54:PASS:511:19:956:0:0:0:0:18	0/0:0,-5.41697,-67.9984:54:PASS:1504:2577:2680:1:0:0:18:0	0/0:0,-17.151,-202.992:10000:PASS:3468:5363:3009:2:0:0:57:0	unitig_1	4866399	909	N	<DEL>	.	.	SVTYPE=DEL;STRANDS=+-:11;SVLEN=-90;END=4866489;CIPOS=-3,2;CIEND=-3,2;CIPOS95=0,0;CIEND95=0,0;SU=11;PE=0;SR=11	GT:SU:PE:SR	./.:0:0:0	./.:11:0:11	./.:0:0:0	./.:0:0:0
unitig_1	4890111	4890337	-	DEL	-	-	226	0	0	0	0	0			unitig_1	4890111	4890337	-	PM1118_GAP	-	-	unitig_1	4890106	DEL00001760	ACTATTGAAACAGGGCAGCAGTGCCTACTGCTGGCCAACACCCTCTCAAGATATCACATAGCACACACACAAACGAAGCCTCCAGGGCATGTAGAACGTAATGGAATGAAAGGGGTAGTCATTCTTGTATTCCGCGTGATGATAGCTAAGTGAAGCAAGTCAAAATGAAGTAAGTAATAGCAAATAAGTCACCTGACTGCTGGCAGGGGTAAGACCCTGCTCCCCCAACTCG	A	.	PASS	PRECISE;SVTYPE=DEL;SVMETHOD=EMBL.DELLYv0.7.7;CHR2=unitig_1;END=4890338;PE=0;MAPQ=60;CT=3to5;CIPOS=-6,6;CIEND=-6,6;INSLEN=0;HOMLEN=5;SR=10;SRQ=0.988372;CONSENSUS=AATTAAGGTTGATGAACACCAGAGACATATCAACCATACGGCAGAAAATACAGGGGAAGAGGAGTCAACTATATTGAGCATAAGATCTGGAAATGAACTCCAACAAGTTATCCATCTTTGGCTTCACGGCAAGCCTGGCTGAGATGGGTGAATAAGGCTGCACGGCCAACCT;CE=1.96149	GT:GL:GQ:FT:RCL:RC:RCR:CN:DR:DV:RR:RV	./.:0,0,0:0:LowQual:2716:33:2530:0:0:0:0:0	1/1:-84.2975,-3.52318,0:35:PASS:1920:82:3877:0:0:0:1:24	0/0:0,-0.300893,-3.49986:5:LowQual:1499:978:3308:0:0:0:1:0	1/1:-277.39,-22.8683,0:10000:PASS:8298:2465:8731:0:0:0:0:76	unitig_1	4890110	911	N	<DEL>	.	.	SVTYPE=DEL;STRANDS=+-:87;SVLEN=-227;END=4890337;CIPOS=0,0;CIEND=0,0;CIPOS95=0,0;CIEND95=0,0;SU=87;PE=0;SR=87	GT:SU:PE:SR	./.:8:0:8	./.:20:0:20	./.:4:0:4	./.:55:0:55
unitig_1	4890111	4890340	-	-	DEL	DEL	229	0	0	0	0	0			unitig_1	4890111	4890340	-	-	PM448_GAP	PM449_GAP	unitig_1	4890106	DEL00001760	ACTATTGAAACAGGGCAGCAGTGCCTACTGCTGGCCAACACCCTCTCAAGATATCACATAGCACACACACAAACGAAGCCTCCAGGGCATGTAGAACGTAATGGAATGAAAGGGGTAGTCATTCTTGTATTCCGCGTGATGATAGCTAAGTGAAGCAAGTCAAAATGAAGTAAGTAATAGCAAATAAGTCACCTGACTGCTGGCAGGGGTAAGACCCTGCTCCCCCAACTCG	A	.	PASS	PRECISE;SVTYPE=DEL;SVMETHOD=EMBL.DELLYv0.7.7;CHR2=unitig_1;END=4890338;PE=0;MAPQ=60;CT=3to5;CIPOS=-6,6;CIEND=-6,6;INSLEN=0;HOMLEN=5;SR=10;SRQ=0.988372;CONSENSUS=AATTAAGGTTGATGAACACCAGAGACATATCAACCATACGGCAGAAAATACAGGGGAAGAGGAGTCAACTATATTGAGCATAAGATCTGGAAATGAACTCCAACAAGTTATCCATCTTTGGCTTCACGGCAAGCCTGGCTGAGATGGGTGAATAAGGCTGCACGGCCAACCT;CE=1.96149	GT:GL:GQ:FT:RCL:RC:RCR:CN:DR:DV:RR:RV	./.:0,0,0:0:LowQual:2716:33:2530:0:0:0:0:0	1/1:-84.2975,-3.52318,0:35:PASS:1920:82:3877:0:0:0:1:24	0/0:0,-0.300893,-3.49986:5:LowQual:1499:978:3308:0:0:0:1:0	1/1:-277.39,-22.8683,0:10000:PASS:8298:2465:8731:0:0:0:0:76	unitig_1	4890110	911	N	<DEL>	.	.	SVTYPE=DEL;STRANDS=+-:87;SVLEN=-227;END=4890337;CIPOS=0,0;CIEND=0,0;CIPOS95=0,0;CIEND95=0,0;SU=87;PE=0;SR=87	GT:SU:PE:SR	./.:8:0:8	./.:20:0:20	./.:4:0:4	./.:55:0:55
unitig_1	4907749	4911796	-	DEL	-	-	4047	0	1	0	1	1	TM1119_g5995	TM1119_g5996	unitig_1	4907749	4911796	-	PM1118_GAP	-	-	unitig_1	4907749	DEL00001761	T	<DEL>	.	PASS	PRECISE;SVTYPE=DEL;SVMETHOD=EMBL.DELLYv0.7.7;CHR2=unitig_1;END=4911797;PE=17;MAPQ=60;CT=3to5;CIPOS=-1,1;CIEND=-1,1;INSLEN=0;HOMLEN=0;SR=10;SRQ=0.983516;CONSENSUS=ATCAGCAACCAGAGATGAAGTACAACCAGGCTTGGCTGAGTCATCATCGGTTGTTTCACGTCACTATCCTCGAGCAGGCGCAACAGTCTCGCAATATAACAACTACAAACCCTTCGGAGTGTGTCACCACAAGAAAGGCACTCACTAATTAGTTCGCAAAATCCGGAGATGTTACGGCAT;CE=1.98169	GT:GL:GQ:FT:RCL:RC:RCR:CN:DR:DV:RR:RV	0/0:0,-4.21299,-52.3986:42:PASS:458:1069:528:2:64:0:14:0	1/1:-49.9978,-4.21226,0:42:PASS:314:6:226:0:0:16:0:14	0/0:0,-7.52291,-91.6972:75:PASS:515:835:427:2:18:0:25:0	0/0:0,-17.4527,-210.393:10000:PASS:1051:2324:1131:2:101:0:58:0	unitig_1	4907744	912	N	<DEL>	.	.	SVTYPE=DEL;STRANDS=+-:28;SVLEN=-4052;END=4911796;CIPOS=-10,9;CIEND=-3,1;CIPOS95=0,0;CIEND95=0,0;SU=28;PE=17;SR=11	GT:SU:PE:SR	./.:0:0:0	./.:28:17:11	./.:0:0:0	./.:0:0:0
unitig_1	4941729	4943520	DEL	-	-	-	1791	1	1	0	2	0	TM1119_g6003;TM1119_g6004		unitig_1	4941729	4943520	PA7_GAP	-	-	-	unitig_1	4941667	DEL00001768	T	<DEL>	.	PASS	IMPRECISE;SVTYPE=DEL;SVMETHOD=EMBL.DELLYv0.7.7;CHR2=unitig_1;END=4943521;PE=45;MAPQ=59;CT=3to5;CIPOS=-50,50;CIEND=-50,50	GT:GL:GQ:FT:RCL:RC:RCR:CN:DR:DV:RR:RV	1/1:-342.699,-18.6632,0:10000:PASS:257:13:214:0:0:62:0:0	0/0:0,-9.32184,-170.49:93:PASS:231:296:138:2:31:0:0:0	0/0:0,-10.8364,-205.399:108:PASS:360:383:96:2:36:0:0:0	0/0:0,-28.5916,-544.594:10000:PASS:506:1004:514:2:95:0:0:0	unitig_1	4941723	914	N	<DEL>	.	.	SVTYPE=DEL;STRANDS=+-:72;SVLEN=-1797;END=4943520;CIPOS=-5,4;CIEND=-9,9;CIPOS95=0,0;CIEND95=0,0;SU=72;PE=63;SR=9	GT:SU:PE:SR	./.:72:63:9	./.:0:0:0	./.:0:0:0	./.:0:0:0
unitig_1	4996057	4996724	-	-	DEL	-	667	0	0	0	0	0			unitig_1	4996057	4996724	-	-	PM448_GAP	-	unitig_1	4996046	DEL00001772	C	<DEL>	.	PASS	PRECISE;SVTYPE=DEL;SVMETHOD=EMBL.DELLYv0.7.7;CHR2=unitig_1;END=4996725;PE=7;MAPQ=60;CT=3to5;CIPOS=-11,11;CIEND=-11,11;INSLEN=0;HOMLEN=11;SR=10;SRQ=0.974619;CONSENSUS=CTGGACTTGCAATACTGAGAATAGAACGTCTTATACTACTTAGCATTCGGCAGGACTGTGGTTGGTTGGCTGAGGCTGAGTGAGAACCATGACCATATCATATAACATAATATAACTACTTACTTTGTTAGCTTTCTAAAAGCTTATAGATTATATATAACATAAAGTTAGAATGAAGATGACAATGTTGATTCTCT;CE=1.9262	GT:GL:GQ:FT:RCL:RC:RCR:CN:DR:DV:RR:RV	./.:0,0,0:0:LowQual:68:38:0:1:0:0:0:0	0/0:0,-3.00909,-36.0988:30:PASS:77:69:39:1:11:0:10:0	1/1:-55.7986,-4.51402,0:45:PASS:91:0:19:0:0:7:0:15	0/0:0,-21.6675,-269.093:10000:PASS:186:394:216:2:83:0:72:0	unitig_1	4996056	917	N	<DEL>	.	.	SVTYPE=DEL;STRANDS=+-:21;SVLEN=-668;END=4996724;CIPOS=-10,9;CIEND=-10,9;CIPOS95=0,0;CIEND95=0,0;SU=21;PE=8;SR=13	GT:SU:PE:SR	./.:0:0:0	./.:0:0:0	./.:21:8:13	./.:0:0:0
unitig_1	4996271	5006621	DEL	-	-	-	10350	0	0	0	0	3		TM1119_g6019;TM1119_g6020;TM1119_g6021	unitig_1	4996271	5006621	PA7_GAP	-	-	-	unitig_1	4996240	DEL00001773	G	<DEL>	.	PASS	IMPRECISE;SVTYPE=DEL;SVMETHOD=EMBL.DELLYv0.7.7;CHR2=unitig_1;END=5006722;PE=32;MAPQ=49;CT=3to5;CIPOS=-50,50;CIEND=-50,50	GT:GL:GQ:FT:RCL:RC:RCR:CN:DR:DV:RR:RV	1/1:-157.184,-9.91836,0:99:PASS:1229:0:1251:0:0:33:0:0	0/0:0,-10.536,-210:105:PASS:1867:1756:2087:1:35:0:0:0	./.:0,0,0:0:LowQual:2320:1947:3098:1:0:0:0:0	0/0:0,-24.68,-485.796:10000:PASS:2579:5802:2450:2:82:0:0:0	unitig_1	4996238	918	N	<DEL>	.	.	SVTYPE=DEL;STRANDS=+-:36;SVLEN=-10455;END=5006693;CIPOS=-10,118;CIEND=-183,9;CIPOS95=-3,32;CIEND95=-53,1;IMPRECISE;SU=36;PE=36;SR=0	GT:SU:PE:SR	./.:36:36:0	./.:0:0:0	./.:0:0:0	./.:0:0:0
unitig_1	5165236	5165744	DEL	DEL	-	-	508	0	0	0	0	0			unitig_1	5165236	5165744	PA7_GAP	PM1118_GAP	-	-	unitig_1	5165236	DEL00001784	T	<DEL>	.	PASS	IMPRECISE;SVTYPE=DEL;SVMETHOD=EMBL.DELLYv0.7.7;CHR2=unitig_1;END=5165745;PE=29;MAPQ=60;CT=3to5;CIPOS=-123,123;CIEND=-123,123	GT:GL:GQ:FT:RCL:RC:RCR:CN:DR:DV:RR:RV	1/1:-319.199,-18.0607,0:10000:PASS:72:0:81:0:0:60:0:0	1/1:-168,-8.72955,0:87:PASS:38:1:38:0:0:29:0:0	0/0:0,-18.0618,-360:10000:PASS:50:176:95:2:60:0:0:0	0/0:0,-32.8122,-652:10000:PASS:122:268:144:2:109:0:0:0	unitig_1	5165235	924	N	<DEL>	.	.	SVTYPE=DEL;STRANDS=+-:99;SVLEN=-509;END=5165744;CIPOS=-2,1;CIEND=-10,9;CIPOS95=0,0;CIEND95=0,0;SU=99;PE=82;SR=17	GT:SU:PE:SR	./.:67:59:8	./.:32:23:9	./.:0:0:0	./.:0:0:0
unitig_1	5641528	5642071	DEL	DEL	-	-	543	0	0	0	0	0			unitig_1	5641528	5642071	PA7_GAP	PM1118_GAP	-	-	unitig_1	5641527	DEL00001818	T	<DEL>	.	PASS	PRECISE;SVTYPE=DEL;SVMETHOD=EMBL.DELLYv0.7.7;CHR2=unitig_1;END=5642072;PE=60;MAPQ=60;CT=3to5;CIPOS=-3,3;CIEND=-3,3;INSLEN=0;HOMLEN=2;SR=10;SRQ=0.974138;CONSENSUS=TGAGATGATTCGGTATCGCATAGACCTTCATTTGAGAGAGTAGAGTAACAAGGGACTTCTCCCGCTTCCCTTCTTAGCATTTACATCCATCTTCCTGTTTGATGCTGATTAATCAC;CE=1.9681	GT:GL:GQ:FT:RCL:RC:RCR:CN:DR:DV:RR:RV	1/1:-105.394,-9.02527,0:90:PASS:60:0:77:0:0:60:0:30	1/1:-28.799,-2.4072,0:24:PASS:35:0:29:0:0:17:0:8	./.:0,0,0:0:LowQual:0:0:0:-1:0:0:0:0	./.:0,0,0:0:LowQual:0:0:0:-1:0:0:0:0	unitig_1	5641527	936	N	<DEL>	.	.	SVTYPE=DEL;STRANDS=+-:96;SVLEN=-548;END=5642075;CIPOS=-2,1;CIEND=-10,5;CIPOS95=0,0;CIEND95=0,0;SU=96;PE=78;SR=18	GT:SU:PE:SR	./.:74:62:12	./.:22:16:6	./.:0:0:0	./.:0:0:0
unitig_1	5652003	5652156	-	DEL	-	-	153	0	0	0	0	0			unitig_1	5652003	5652156	-	PM1118_GAP	-	-	unitig_1	5652001	DEL00001819	GAGAATGCTTTTTCGTAGCGTCTCTTAAGGCATGAGATTGCTCGTCTGCTGTATTGATCATCTTTCTGACGAAGGAGAAGGATTTCATAAGGTTATGTCACTTTTGCAAAGACTCAATCAAACCCCTCGCTCAGATTGAAATTGAGGTGTTATTGA	G	.	PASS	PRECISE;SVTYPE=DEL;SVMETHOD=EMBL.DELLYv0.7.7;CHR2=unitig_1;END=5652157;PE=0;MAPQ=60;CT=3to5;CIPOS=-3,3;CIEND=-3,3;INSLEN=0;HOMLEN=3;SR=10;SRQ=0.987288;CONSENSUS=AGGTCATTTGAGACCAAACATATAATTCAGTAGAATCGAAGGGGGAATCTAGATGGAAAGCCAATGTCGCGAAGCAGTAATACTTTCCTGAAAGAATGCAAGGTCAGAGAACTCAAGGAGCTTGAGGAAGCTACACAGGTTCCACAGAATCTTAAACCAATCACAAATTTACGTGTGGTCAACCATGTTACTCCAACAATCTAGGGAAGAAGTGCCACCAGGTTAACTATGCTGAG;C…	GT:GL:GQ:FT:RCL:RC:RCR:CN:DR:DV:RR:RV	./.:0,0,0:0:LowQual:0:0:0:-1:0:0:0:0	1/1:-33.7978,-3.00814,0:30:PASS:916:13:809:0:0:0:0:10	./.:0,0,0:0:LowQual:0:0:0:-1:0:0:0:0	./.:0,0,0:0:LowQual:0:0:0:-1:0:0:0:0	unitig_1	5652002	938	N	<DEL>	.	.	SVTYPE=DEL;STRANDS=+-:8;SVLEN=-154;END=5652156;CIPOS=-10,9;CIEND=-10,9;CIPOS95=0,0;CIEND95=0,0;SU=8;PE=0;SR=8	GT:SU:PE:SR	./.:0:0:0	./.:8:0:8	./.:0:0:0	./.:0:0:0
unitig_1	5752001	5753855	-	DEL	DEL	-	1854	0	0	0	0	0			unitig_1	5752001	5753855		PM1118_GAP	PM448_GAP		unitig_1	5751998	DEL00001824	A	<DEL>	.	PASS	PRECISE;SVTYPE=DEL;SVMETHOD=EMBL.DELLYv0.7.7;CHR2=unitig_1;END=5753856;PE=70;MAPQ=60;CT=3to5;CIPOS=-4,4;CIEND=-4,4;INSLEN=0;HOMLEN=3;SR=10;SRQ=1;CONSENSUS=CTATATTCATGACAGAAAGTGCCAATCAGACGTAACGTTGATTGCTTAAATATACGAGTAATATGCTCTCATTCTAAGTAAAAATGACTAGCGCTGCATGTACAGTGTACACGAGCAA;CE=1.94457	GT:GL:GQ:FT:RCL:RC:RCR:CN:DR:DV:RR:RV	1/1:-53.1958,-4.51121,0:45:PASS:252:374:279:1:0:70:0:15	1/1:-72.2976,-6.01819,0:60:PASS:169:2:151:0:0:52:0:20	1/1:-75.2975,-6.31909,0:63:PASS:190:0:149:0:0:53:0:21	1/1:-307.592,-24.9774,0:10000:PASS:521:941:510:2:0:97:0:83	unitig_1	5752000	943	N	<DEL>	.	.	SVTYPE=DEL;STRANDS=+-:381;SVLEN=-1855;END=5753855;CIPOS=0,0;CIEND=0,0;CIPOS95=0,0;CIEND95=0,0;SU=381;PE=277;SR=104	GT:SU:PE:SR	./.:77:70:7	./.:69:53:16	./.:71:57:14	./.:164:97:67
unitig_2	86694	86851	-	DEL	-	-	157	0	0	0	0	0			unitig_2	86694	86851	-	PM1118_GAP	-	-	unitig_2	86691	DEL00000993	CTTATTGTAGCCTTCTCTAAATGCATTGTCTGAACGGAGATGGGATTTCAATAGAGTGTGCGAGTGTTCCAGAGCAACATCACTTAGCATCATGTTCCCCGATTTTGCAGCTGCATAGAAGAGCAGGTCCATGTTGCACATTAAGTCAATGATCACCAGAAAGTT	C	.	PASS	PRECISE;SVTYPE=DEL;SVMETHOD=EMBL.DELLYv0.7.7;CHR2=unitig_2;END=86856;PE=0;MAPQ=60;CT=3to5;CIPOS=-4,4;CIEND=-4,4;INSLEN=0;HOMLEN=6;SR=10;SRQ=1;CONSENSUS=CATATCCAAGGATGGCCCATGCTGGGCCCCGTGACCATGTCGACGTAGCATGGTACCCTTAGGCAGCCTATAATATCTTAATAGAGCAACAATTAGGATCGGAGTTGACAAGATGTATAGTGCTGCATGGAGTCTTCACTCCTTAGACTGATTCTTCATATCTCAATGCTATTCCATAACATCCCAAGAATAGATAGCCATGAGATTGTCGTCGAATCGGC;CE=1.99271	GT:GL:GQ:FT:RCL:RC:RCR:CN:DR:DV:RR:RV	0/0:0,-6.01844,-74.3978:60:PASS:2631:4530:1947:2:0:0:20:0	1/1:-32.599,-2.70825,0:27:PASS:1267:28:1265:0:0:0:0:9	0/0:0,-4.21215,-48.8977:42:PASS:1861:2102:1753:1:0:0:14:0	0/0:0,-21.9677,-273.793:10000:PASS:7150:15984:6741:2:0:0:73:0	unitig_2	86693	644	N	<DEL>	.	.	SVTYPE=DEL;STRANDS=+-:6;SVLEN=-162;END=86855;CIPOS=-6,5;CIEND=-6,5;CIPOS95=0,0;CIEND95=0,0;SU=6;PE=0;SR=6	GT:SU:PE:SR	./.:0:0:0	./.:6:0:6	./.:0:0:0	./.:0:0:0
unitig_2	135522	135620	DEL	-	-	-	98	0	0	0	0	0			unitig_2	135522	135620	PA7_GAP	-	-	-	unitig_2	135519	DEL00000994	GCCTGGGTACCAAGCCAGCTAGCGTGTCTTCTGGGAGCTTGCTACCTATGACGTGCACTTGCCTCATCCCTTTTGGAACAGCTTCGATGATGCTCGGCTATC	G	.	PASS	PRECISE;SVTYPE=DEL;SVMETHOD=EMBL.DELLYv0.7.7;CHR2=unitig_2;END=135621;PE=0;MAPQ=60;CT=3to5;CIPOS=-3,3;CIEND=-3,3;INSLEN=0;HOMLEN=3;SR=10;SRQ=0.990291;CONSENSUS=CCAGCCCCGAAGCGGCTGCGTAGTTACGTACCGTACCTTACCCTCACGCCGATCAACAATTCCCCCGGCGTGCATCGTCGCACCTACCGATGAATCTTTTATT;CE=1.9473	GT:GL:GQ:FT:RCL:RC:RCR:CN:DR:DV:RR:RV	1/1:-114.49,-10.5261,0:105:PASS:1428:62:1644:0:0:0:0:35	0/0:0,-7.82325,-92.9965:78:PASS:1442:3624:1826:2:0:0:26:0	0/0:0,-16.249,-195.193:10000:PASS:3718:7279:3197:2:0:0:54:0	0/0:0,-20.1579,-233.989:10000:PASS:4312:8778:4208:2:0:0:67:0	unitig_2	135521	645	N	<DEL>	.	.	SVTYPE=DEL;STRANDS=+-:22;SVLEN=-99;END=135620;CIPOS=-10,9;CIEND=-10,9;CIPOS95=0,0;CIEND95=0,0;SU=22;PE=0;SR=22	GT:SU:PE:SR	./.:22:0:22	./.:0:0:0	./.:0:0:0	./.:0:0:0
unitig_2	173556	173868	DEL	-	DEL	DEL	312	0	0	0	0	0			unitig_2	173556	173868	PA7_GAP	-	PM448_GAP	PM449_GAP	unitig_2	173555	DEL00000995	G	<DEL>	.	PASS	PRECISE;SVTYPE=DEL;SVMETHOD=EMBL.DELLYv0.7.7;CHR2=unitig_2;END=173860;PE=11;MAPQ=60;CT=3to5;CIPOS=-2,2;CIEND=-2,2;INSLEN=0;HOMLEN=2;SR=10;SRQ=0.974619;CONSENSUS=TTTGAAGGGCATCATGGCCTGTTCATTTTAAAGGGCTACTACCTTCGCTATACTTGGCCGAGCTATAGTAATAAACGAACTCTTTTTGACTTGAACAAGCTGCCAGAGTTTTCTGAGAAACTTTTCACAGCACATATCTGAAGTCGACGTTCTCGAGATCAGTCTTGTCGTGCATACCCAGGCGCATACCATCCAGC;CE=1.98747	GT:GL:GQ:FT:RCL:RC:RCR:CN:DR:DV:RR:RV	1/1:-45.596,-3.90935,0:39:PASS:3707:0:2196:0:0:54:0:13	0/0:0,-3.30943,-39.0981:33:PASS:1835:3343:2858:1:11:0:11:0	1/1:-59.3985,-4.81496,0:48:PASS:1852:0:3838:0:0:10:0:16	1/1:-201.394,-16.5507,0:10000:PASS:11458:1:10953:0:0:61:0:55	unitig_2	173555	646	N	<DEL>	.	.	SVTYPE=DEL;STRANDS=+-:57;SVLEN=-313;END=173868;CIPOS=0,0;CIEND=0,0;CIPOS95=0,0;CIEND95=0,0;SU=57;PE=3;SR=54	GT:SU:PE:SR	./.:3:0:3	./.:0:0:0	./.:12:2:10	./.:42:1:41
unitig_2	305294	305524	DEL	-	-	DEL	230	0	0	0	0	0			unitig_2	305294	305524	PA7_GAP	-	-	PM449_GAP	unitig_2	305286	DEL00000999	AGTACAGTGGGTGGCAATAAGTATTTGGCCAAAGTGAAGTAGCTAATTCCGCGTAAAGTCTTGGCAGTATATTGCTAAGCCCAATGTAGAATAACCCTAACCCTATCCCTAACCCTAATGCACTGAAATTTGAGGGTTAGGGTTAGGGGTATACTATATCGAGCCTAGAGTGGTTTGCTGCCAAGACTTTATGCGAAATTAGCTACTCTACTTTGGCCAAATACTTATTGCCACCCACT	A	.	PASS	PRECISE;SVTYPE=DEL;SVMETHOD=EMBL.DELLYv0.7.7;CHR2=unitig_2;END=305525;PE=0;MAPQ=60;CT=3to5;CIPOS=-8,8;CIEND=-8,8;INSLEN=0;HOMLEN=8;SR=10;SRQ=1;CONSENSUS=GTCGGCTATGGCCGTCCGGCCACCAACTTCTATGATAACAGAGAGCCGAACTAGAACCAGTACAGTCCATCAATTCCACGTCTGGGAAGGGTTTCCCACAACGGAACAGATCCAGTC;CE=1.97738	GT:GL:GQ:FT:RCL:RC:RCR:CN:DR:DV:RR:RV	1/1:-54.498,-4.5134,0:45:PASS:2538:1069:2323:0:0:0:0:15	1/1:-94.596,-8.12381,0:81:PASS:4849:4234:2156:1:0:0:0:27	1/1:-138.993,-12.0347,0:120:PASS:6216:4196:3719:1:0:0:0:40	1/1:-201.992,-16.8502,0:10000:PASS:8323:3445:7516:0:0:0:0:56	unitig_2	305293	650	N	<DEL>	.	.	SVTYPE=DEL;STRANDS=+-:119;SVLEN=-231;END=305524;CIPOS=0,0;CIEND=0,0;CIPOS95=0,0;CIEND95=0,0;SU=119;PE=0;SR=119	GT:SU:PE:SR	./.:11:0:11	./.:22:0:22	./.:35:0:35	./.:51:0:51
unitig_2	368368	376207	DEL	-	DEL	DEL	7839	0	0	0	0	2		TM1119_g2659;TM1119_g2660	unitig_2	368368	376207	PA7_GAP	-	PM448_GAP	PM449_GAP	unitig_2	368368	DEL00001006	A	<DEL>	.	PASS	IMPRECISE;SVTYPE=DEL;SVMETHOD=EMBL.DELLYv0.7.7;CHR2=unitig_2;END=376206;PE=75;MAPQ=60;CT=3to5;CIPOS=-50,50;CIEND=-50,50	GT:GL:GQ:FT:RCL:RC:RCR:CN:DR:DV:RR:RV	1/1:-264.1,-14.1481,0:141:PASS:1056:2:999:0:0:47:0:0	0/0:0,-7.82649,-152.5:78:PASS:736:1508:630:2:26:0:0:0	1/1:-132,-6.62265,0:66:PASS:1081:0:787:0:0:22:0:0	1/1:-448.6,-22.5772,0:10000:PASS:2225:2:2008:0:0:75:0:0	unitig_2	368367	652	N	<DEL>	.	.	SVTYPE=DEL;STRANDS=+-:192;SVLEN=-7844;END=376211;CIPOS=0,0;CIEND=0,0;CIPOS95=0,0;CIEND95=0,0;SU=192;PE=146;SR=46	GT:SU:PE:SR	./.:49:47:2	./.:0:0:0	./.:35:22:13	./.:108:77:31
unitig_2	380170	380365	DEL	-	DEL	DEL	195	0	0	0	0	0			unitig_2	380170	380365	PA7_GAP	-	PM448_GAP	PM449_GAP	unitig_2	380167	DEL00001007	TTACACCTCCGCCGGGGTATTTATTGTTAGTTCGTCAAGGGTGAAGATACTGAAAAAACAAGGATCGCGTTACCTGATTGAGGCTTCGAAGCTTCTGTTTATTTCTATAGCCCCACTGGCCTTGACAAAAGTAGCAATCCCCTTGTTTGAAGAGTCGTGATCCTTCGCCTAATTAACATTAAATACCCCGGCGGAGGTG	T	.	PASS	PRECISE;SVTYPE=DEL;SVMETHOD=EMBL.DELLYv0.7.7;CHR2=unitig_2;END=380366;PE=0;MAPQ=60;CT=3to5;CIPOS=-4,4;CIEND=-4,4;INSLEN=0;HOMLEN=3;SR=10;SRQ=0.982456;CONSENSUS=AGGAGCACGGATGCGGCGCATTTCTGCCGCCAAGAGAAGATCAGCCATGATTAGAATATTCGAAAACGAAAACTCGCGCTTGGATGATGTCTATGAAATGGGCCAGGTTGTGAC;CE=1.97745	GT:GL:GQ:FT:RCL:RC:RCR:CN:DR:DV:RR:RV	1/1:-86.7962,-7.22094,0:72:PASS:2345:119:2577:0:0:0:0:24	0/0:0,-4.51365,-54.0982:45:PASS:1829:5264:2313:3:0:0:15:0	1/1:-127.895,-10.8323,0:108:PASS:3260:118:2487:0:0:0:0:36	1/1:-237.292,-19.5593,0:10000:PASS:6256:113:7329:0:0:0:0:65	unitig_2	380169	653	N	<DEL>	.	.	SVTYPE=DEL;STRANDS=+-:92;SVLEN=-196;END=380365;CIPOS=0,0;CIEND=0,0;CIPOS95=0,0;CIEND95=0,0;SU=92;PE=0;SR=92	GT:SU:PE:SR	./.:14:0:14	./.:0:0:0	./.:31:0:31	./.:47:0:47
unitig_2	462333	462429	-	-	DEL	-	96	0	0	0	0	0			unitig_2	462333	462429	-	-	PM448_GAP	-	unitig_2	462332	DEL00001010	ACATCCTGTCCGACAAGATACCGGGACACATGCATGCTAACCAGTCATAACGCATGTTTACAAGCCATCATACCTAGGTAGTCTTAAGTGTAAGTT	A	.	PASS	PRECISE;SVTYPE=DEL;SVMETHOD=EMBL.DELLYv0.7.7;CHR2=unitig_2;END=462428;PE=0;MAPQ=60;CT=3to5;CIPOS=-2,2;CIEND=-2,2;INSLEN=0;HOMLEN=2;SR=7;SRQ=0.978836;CONSENSUS=TCTACAAGTGTATAAGTGCGACAAGACTCCATAAATAGGTAGGCTGTTGATTTCAGTCACGAAAATACGTTCGGAATTGAGCAGTCCGATATAAAGCTGGTATAGATACATATGTCACTCATTGAACATCCCTTGTGTTAGGCGATGGTTGCAAAGTGAACGACACGTCTGCTCAACCAGTCGTTTA;CE=1.97742	GT:GL:GQ:FT:RCL:RC:RCR:CN:DR:DV:RR:RV	0/0:0,-4.51429,-56.7988:45:PASS:1560:2325:767:2:0:0:15:0	0/0:0,-4.51389,-55.4984:45:PASS:716:1769:1113:2:0:0:15:0	1/1:-26.0994,-2.10658,0:21:PASS:255:1:321:0:0:0:0:7	./.:0,0,0:0:LowQual:3458:3894:0:2:0:0:0:0	unitig_2	462332	659	N	<DEL>	.	.	SVTYPE=DEL;STRANDS=+-:7;SVLEN=-97;END=462429;CIPOS=-5,4;CIEND=-5,4;CIPOS95=0,0;CIEND95=0,0;SU=7;PE=0;SR=7	GT:SU:PE:SR	./.:0:0:0	./.:0:0:0	./.:7:0:7	./.:0:0:0
unitig_2	569610	570293	DEL	-	-	-	683	0	0	0	0	0			unitig_2	569610	570293	PA7_GAP	-	-	-	unitig_2	569607	DEL00001021	T	<DEL>	.	PASS	PRECISE;SVTYPE=DEL;SVMETHOD=EMBL.DELLYv0.7.7;CHR2=unitig_2;END=570294;PE=62;MAPQ=60;CT=3to5;CIPOS=-5,5;CIEND=-5,5;INSLEN=0;HOMLEN=4;SR=10;SRQ=0.976;CONSENSUS=CGTTTTGATTTGGCTTAGGATATGGCGGGCCGCAGCTGGCTCCTCGGGTTTCGTCCGGCAGCCTATATAGGGCACTGCGAGCATTATATTCGTAAACGATGGCCCAGTCGTCTTTGCCTATGTCT;CE=1.96133	GT:GL:GQ:FT:RCL:RC:RCR:CN:DR:DV:RR:RV	1/1:-46.5956,-4.20997,0:42:PASS:81:0:105:0:0:62:0:14	0/0:0,-6.92015,-82.7965:69:PASS:52:114:64:2:32:0:23:0	0/0:0,-9.9301,-119.496:99:PASS:76:144:49:2:31:0:33:0	0/0:0,-18.0531,-215.991:10000:PASS:175:348:185:2:103:0:60:0	unitig_2	569609	665	N	<DEL>	.	.	SVTYPE=DEL;STRANDS=+-:70;SVLEN=-684;END=570293;CIPOS=-10,9;CIEND=-10,9;CIPOS95=0,0;CIEND95=0,0;SU=70;PE=62;SR=8	GT:SU:PE:SR	./.:70:62:8	./.:0:0:0	./.:0:0:0	./.:0:0:0
unitig_2	630689	630896	-	-	DEL	-	207	0	0	1	1	0	TM1119_g2756		unitig_2	630689	630896	-	-	PM448_GAP	-	unitig_2	630685	DEL00001026	CCCTGTCCCCTGTATTCTCGACCTCAACTGAGACACGGAAATCTTTATTCGCGCCATCGTCAAACTGTACTTCTATCGGAACTCGGAGGTTTGAATATTCGAATGATGTGTAGGAGAGGCCATAGCCGAAATAGAATAAGGGGTCGTTGTGTAGCTTCTCATAGTATCTGTAGCCGATGAATATCCCTTCACCGTAGAGGATTTCACGGCTT	C	.	PASS	PRECISE;SVTYPE=DEL;SVMETHOD=EMBL.DELLYv0.7.7;CHR2=unitig_2;END=630897;PE=0;MAPQ=60;CT=3to5;CIPOS=-5,5;CIEND=-5,5;INSLEN=0;HOMLEN=5;SR=10;SRQ=0.987421;CONSENSUS=CCTTTTAGCTCTTTGCGAGGCCGGGACTGTGCACATTCAACATCTTGAACGTACACCTGAACTATCTCGAAACCATCCCTTTTCCAAATGTCAAGAAGGCTGGGATGTCCTCCAGCCGCTTTGGGGACGTTACGGACAAACGCCCGCTAGGATTATGTT;CE=1.9949	GT:GL:GQ:FT:RCL:RC:RCR:CN:DR:DV:RR:RV	0/0:0,-4.51314,-53.6977:45:PASS:2608:4744:2741:2:0:0:15:0	0/0:0,-5.71671,-68.2971:57:PASS:2240:3939:2478:2:0:0:19:0	1/1:-140.094,-12.0352,0:120:PASS:2398:87:4048:0:0:0:0:40	0/0:0,-20.7624,-249.191:10000:PASS:9803:19158:9773:2:0:0:69:0	unitig_2	630688	666	N	<DEL>	.	.	SVTYPE=DEL;STRANDS=+-:37;SVLEN=-208;END=630896;CIPOS=0,0;CIEND=0,0;CIPOS95=0,0;CIEND95=0,0;SU=37;PE=0;SR=37	GT:SU:PE:SR	./.:0:0:0	./.:0:0:0	./.:37:0:37	./.:0:0:0
unitig_2	701073	702684	DEL	-	DEL	DEL	1611	0	1	0	1	0	TM1119_g2781		unitig_2	701073	702684	PA7_GAP	-	PM448_GAP	PM449_GAP	unitig_2	701070	DEL00001032	A	<DEL>	.	PASS	PRECISE;SVTYPE=DEL;SVMETHOD=EMBL.DELLYv0.7.7;CHR2=unitig_2;END=702685;PE=62;MAPQ=60;CT=3to5;CIPOS=-3,3;CIEND=-3,3;INSLEN=0;HOMLEN=2;SR=10;SRQ=0.992481;CONSENSUS=CTCATTTTTTCTGATAACTAGGCTTCACTCAAATGTCTCTAGAAGGTTCATCCTAGCCCTAACTGAAAAGTGACGGATGGCACAAGAGTGCGCCCACGTCATGATAATGATGCATGTACGCCAACGAAAGGAT;CE=1.98734	GT:GL:GQ:FT:RCL:RC:RCR:CN:DR:DV:RR:RV	1/1:-85.0956,-7.22032,0:72:PASS:201:0:225:0:0:62:0:24	0/0:0,-7.52273,-92.497:75:PASS:187:373:124:2:40:1:25:0	1/1:-134.697,-10.8338,0:108:PASS:305:0:135:0:0:26:0:36	1/1:-275.892,-19.2714,0:10000:PASS:447:2:487:0:0:106:1:76	unitig_2	701072	667	N	<DEL>	.	.	SVTYPE=DEL;STRANDS=+-:285;SVLEN=-1612;END=702684;CIPOS=0,0;CIEND=0,0;CIPOS95=0,0;CIEND95=0,0;SU=285;PE=201;SR=84	GT:SU:PE:SR	./.:68:62:6	./.:1:1:0	./.:59:31:28	./.:157:107:50
unitig_2	801602	802989	DEL	-	-	-	1387	1	1	0	2	0	TM1119_g2810;TM1119_g2811		unitig_2	801602	802989	PA7_GAP	-	-	-	unitig_2	801600	DEL00001039	G	<DEL>	.	PASS	PRECISE;SVTYPE=DEL;SVMETHOD=EMBL.DELLYv0.7.7;CHR2=unitig_2;END=802986;PE=66;MAPQ=60;CT=3to5;CIPOS=-2,2;CIEND=-2,2;INSLEN=0;HOMLEN=2;SR=10;SRQ=0.981308;CONSENSUS=GAGAGTGGGAGGCTTTATCAAGATTCCATCGTCTAGAACGCCGCAATACTATGGGAGTAGTGGAATGACACAACTCATCTCAACGACTATGGAAGCATAGTCTTCG;CE=1.98654	GT:GL:GQ:FT:RCL:RC:RCR:CN:DR:DV:RR:RV	1/1:-74.1929,-6.61561,0:66:PASS:190:0:192:0:0:66:0:22	0/0:0,-7.2212,-84.8965:72:PASS:209:241:105:2:29:0:24:0	0/0:0,-12.9374,-153.793:129:PASS:277:469:154:2:20:0:43:0	0/0:0,-17.7531,-212.892:10000:PASS:333:709:422:2:85:0:59:0	unitig_2	801601	640	N	<DEL>	.	.	SVTYPE=DEL;STRANDS=+-:75;SVLEN=-1388;END=802989;CIPOS=-10,9;CIEND=-10,9;CIPOS95=0,0;CIEND95=0,0;SU=75;PE=68;SR=7	GT:SU:PE:SR	./.:75:68:7	./.:0:0:0	./.:0:0:0	./.:0:0:0
unitig_2	1035484	1038133	-	-	-	DEL	2649	1	0	0	1	1	TM1119_g2900	TM1119_g2899	unitig_2	1035484	1038133	-	-	-	PM449_GAP	unitig_2	1035481	DEL00001054	G	<DEL>	.	PASS	PRECISE;SVTYPE=DEL;SVMETHOD=EMBL.DELLYv0.7.7;CHR2=unitig_2;END=1038134;PE=92;MAPQ=60;CT=3to5;CIPOS=-5,5;CIEND=-5,5;INSLEN=0;HOMLEN=5;SR=10;SRQ=0.994012;CONSENSUS=AGTACACGCCTTTGGCAAGTCGATGCTGCTTATTCCTCTGATATCTGGAAAGAAAGCCAGTATGAGCAGCGACGAGCATATTGCAGCCTGATATGTTCAGAAAAGTGCACAACTATAACCGACAGTCTTTTGGGCATCAAGGAAATCTTGGGCTGCACCGACAAGTT;CE=1.99204	GT:GL:GQ:FT:RCL:RC:RCR:CN:DR:DV:RR:RV	0/0:0,-5.41596,-64.9974:54:PASS:329:610:338:2:55:0:18:0	0/0:0,-7.82295,-92.4962:78:PASS:264:519:138:3:35:0:26:0	0/0:0,-9.02588,-106.095:90:PASS:449:860:164:3:42:0:30:0	1/1:-234.689,-19.8568,0:10000:PASS:751:1:706:0:0:92:0:66	unitig_2	1035483	670	N	<DEL>	.	.	SVTYPE=DEL;STRANDS=+-:145;SVLEN=-2650;END=1038133;CIPOS=0,0;CIEND=0,0;CIPOS95=0,0;CIEND95=0,0;SU=145;PE=93;SR=52	GT:SU:PE:SR	./.:0:0:0	./.:0:0:0	./.:0:0:0	./.:145:93:52
unitig_2	1052070	1056490	DEL	-	-	-	4420	0	0	0	0	1		TM1119_g2906	unitig_2	1052070	1056490	PA7_GAP	-	-	-	unitig_2	1052070	DEL00001056	T	<DEL>	.	PASS	IMPRECISE;SVTYPE=DEL;SVMETHOD=EMBL.DELLYv0.7.7;CHR2=unitig_2;END=1056489;PE=47;MAPQ=60;CT=3to5;CIPOS=-50,50;CIEND=-50,50	GT:GL:GQ:FT:RCL:RC:RCR:CN:DR:DV:RR:RV	1/1:-260.4,-14.1481,0:141:PASS:240:0:561:0:0:47:0:0	0/0:0,-7.52538,-145.6:75:PASS:430:666:618:1:25:0:0:0	0/0:0,-4.81647,-96:48:PASS:650:786:887:1:16:0:0:0	./.:0,0,0:0:LowQual:4:70:899:0:0:0:0:0	unitig_2	1052069	671	N	<DEL>	.	.	SVTYPE=DEL;STRANDS=+-:51;SVLEN=-4421;END=1056490;CIPOS=-10,0;CIEND=-10,1;CIPOS95=-1,0;CIEND95=-1,0;IMPRECISE;SU=51;PE=48;SR=3	GT:SU:PE:SR	./.:51:48:3	./.:0:0:0	./.:0:0:0	./.:0:0:0
unitig_2	1091384	1091513	-	DEL	-	-	129	0	0	0	0	0			unitig_2	1091384	1091513	-	PM1118_GAP	-	-	unitig_2	1091382	DEL00001059	TCTGGTTATTAACAAGGGGGAAAGGGGAGCCCAAGGCAGGGGAGAGAAGATTGCAAACGCCCAATAACAGATTCATGGGGACCGCTCCGAGAAATCTGTTAGGTTTGCGTTGTAGGTCATGTCATTTTGTTC	T	.	PASS	PRECISE;SVTYPE=DEL;SVMETHOD=EMBL.DELLYv0.7.7;CHR2=unitig_2;END=1091514;PE=0;MAPQ=60;CT=3to5;CIPOS=-5,5;CIEND=-5,5;INSLEN=0;HOMLEN=4;SR=10;SRQ=0.987952;CONSENSUS=ATTTCTTTGCTAGCCGCCGCCGAAGTAACAGAAGACGGAGACGACTGGAGACGACGAAATCAGATCGCGTCATCTAGTGCCACGGCACCTGTGGGAGACCTGGCGCCTGCTTTTACGGGGCCGATGTGGGAGGTAGCGGCCGAAATTGTGCAGGCTCAGTGGAGCC;CE=1.96529	GT:GL:GQ:FT:RCL:RC:RCR:CN:DR:DV:RR:RV	0/0:0,-3.00629,-33.196:30:PASS:1421:2070:1174:2:0:0:10:0	1/1:-157.494,-10.4408,0:104:PASS:1696:148:3605:0:0:0:1:45	0/0:0,-17.4524,-208.893:10000:PASS:3333:9636:7151:2:0:0:58:0	0/0:0,-17.7536,-212.793:10000:PASS:4330:9161:4898:2:0:0:59:0	unitig_2	1091384	672	N	<DEL>	.	.	SVTYPE=DEL;STRANDS=+-:29;SVLEN=-129;END=1091513;CIPOS=-1,0;CIEND=-1,0;CIPOS95=0,0;CIEND95=0,0;SU=29;PE=0;SR=29	GT:SU:PE:SR	./.:0:0:0	./.:28:0:28	./.:0:0:0	./.:0:0:0
unitig_2	1155484	1160936	DEL	-	DEL	DEL	5452	0	0	0	0	1		TM1119_g2940	unitig_2	1155484	1160936	PA7_GAP	-	PM448_GAP	PM449_GAP	unitig_2	1155483	DEL00001061	T	<DEL>	.	PASS	PRECISE;SVTYPE=DEL;SVMETHOD=EMBL.DELLYv0.7.7;CHR2=unitig_2;END=1160936;PE=25;MAPQ=60;CT=3to5;CIPOS=-2,2;CIEND=-2,2;INSLEN=0;HOMLEN=1;SR=10;SRQ=0.981481;CONSENSUS=GAGCCAAGGCTAAGCCGATACAGCAGCCTAAGCAGCCTATAATAACCAAGGACTAAGTAGGCATGATCTATGTCAAAATTTGTTACCCGACGACACCGCCCAACACTTCGTAAATACCAGCAGGCGCCGAGTAAGCTAGCTAGCAATACAGTTTGTACAACA;CE=1.95582	GT:GL:GQ:FT:RCL:RC:RCR:CN:DR:DV:RR:RV	1/1:-81.694,-6.91773,0:69:PASS:587:0:650:0:0:53:0:23	0/0:0,-7.52005,-87.0943:75:PASS:636:1045:830:1:38:0:25:0	1/1:-126.594,-10.8316,0:108:PASS:871:90:901:0:0:24:0:36	1/1:-202.693,-16.8508,0:10000:PASS:1384:2:1443:0:0:95:0:56	unitig_2	1155483	673	N	<DEL>	.	.	SVTYPE=DEL;STRANDS=+-:258;SVLEN=-5453;END=1160936;CIPOS=0,0;CIEND=0,0;CIPOS95=0,0;CIEND95=0,0;SU=258;PE=177;SR=81	GT:SU:PE:SR	./.:65:53:12	./.:0:0:0	./.:54:26:28	./.:139:98:41
unitig_2	1185758	1185943	DEL	DEL	DEL	DEL	185	0	0	0	0	0			unitig_2	1185758	1185943	PA7_GAP	PM1118_GAP	PM448_GAP	PM449_GAP	unitig_2	1185756	DEL00001065	CGCCGCATGCTGCGGCACCAAGCCTCGTCACCTTAGTATTGCCTTTGGAATAACATCTTTAATAGCTTGAATAATTATATCGTCTTCCTGGTATGCTCTTTAGTTATTAAACTTGATCAAACTTCCTTCATATTCCTGCATTGGCTCTAGACTAACCTCAAATAACCCGATCACGTTATGAAGCAACG	C	.	PASS	PRECISE;SVTYPE=DEL;SVMETHOD=EMBL.DELLYv0.7.7;CHR2=unitig_2;END=1185944;PE=0;MAPQ=60;CT=3to5;CIPOS=-3,3;CIEND=-3,3;INSLEN=0;HOMLEN=3;SR=10;SRQ=0.992126;CONSENSUS=GTCAGTACGGGACATGATTGTGGGGTTGCCTTGAATCTTGAGCTGAAGGACCACACTGACCGATCCTTATCATGTATCCTTTAGGGAAACGGCGCGTAGATGAACATGCCCGCGCTTCAAGACCCGA;CE=1.99741	GT:GL:GQ:FT:RCL:RC:RCR:CN:DR:DV:RR:RV	1/1:-59.3962,-5.11367,0:51:PASS:1567:21:1514:0:0:0:0:17	1/1:-95.9931,-5.4239,0:54:PASS:1924:101:3830:0:0:0:1:29	1/1:-115.592,-10.227,0:102:PASS:2423:45:4529:0:0:0:0:34	1/1:-191.791,-16.2471,0:10000:PASS:5093:64:4695:0:0:0:0:54	unitig_2	1185757	674	N	<DEL>	.	.	SVTYPE=DEL;STRANDS=+-:101;SVLEN=-186;END=1185943;CIPOS=0,0;CIEND=0,0;CIPOS95=0,0;CIEND95=0,0;SU=101;PE=1;SR=100	GT:SU:PE:SR	./.:9:0:9	./.:24:1:23	./.:24:0:24	./.:44:0:44
unitig_2	1293964	1294287	DEL	DEL	-	DEL	323	0	0	0	0	0			unitig_2	1293964	1294287	PA7_GAP	PM1118_GAP	-	PM449_GAP	unitig_2	1293959	DEL00001070	G	<DEL>	.	PASS	PRECISE;SVTYPE=DEL;SVMETHOD=EMBL.DELLYv0.7.7;CHR2=unitig_2;END=1294292;PE=45;MAPQ=60;CT=3to5;CIPOS=-5,5;CIEND=-5,5;INSLEN=0;HOMLEN=7;SR=10;SRQ=0.991379;CONSENSUS=TGCTGTAGTGCCATAACGGAGCGGACCTTAACACTGTATATATTAAAGATAGCCTCTTCGCCGTCGCCCTCGCGTAAGGTAGTTATTATCTCATCGCCGTGACCTACACGTCGAAG;CE=1.99611	GT:GL:GQ:FT:RCL:RC:RCR:CN:DR:DV:RR:RV	1/1:-43.7985,-3.61086,0:36:PASS:3245:46:3629:0:0:45:0:12	1/1:-58.9984,-4.81486,0:48:PASS:2670:52:3675:0:0:9:0:16	0/0:0,-4.22396,-87.4973:42:PASS:5837:7842:5159:1:23:0:25:1	1/1:-202.791,-17.4504,0:10000:PASS:9851:212:10418:0:0:72:0:58	unitig_2	1293963	676	N	<DEL>	.	.	SVTYPE=DEL;STRANDS=+-:66;SVLEN=-328;END=1294291;CIPOS=0,0;CIEND=0,0;CIPOS95=0,0;CIEND95=0,0;SU=66;PE=1;SR=65	GT:SU:PE:SR	./.:10:1:9	./.:11:0:11	./.:1:0:1	./.:44:0:44
unitig_2	2294162	2294836	DEL	-	DEL	DEL	674	0	0	0	0	0			unitig_2	2294162	2294836	PA7_GAP	-	PM448_GAP	PM449_GAP	unitig_2	2294151	DEL00001131	T	<DEL>	.	PASS	PRECISE;SVTYPE=DEL;SVMETHOD=EMBL.DELLYv0.7.7;CHR2=unitig_2;END=2294837;PE=58;MAPQ=60;CT=3to5;CIPOS=-12,12;CIEND=-12,12;INSLEN=0;HOMLEN=11;SR=10;SRQ=0.991228;CONSENSUS=GACATCAAGATTGCCGAGTCAGCGGACTAATACGCCCCACTAACATGACTTTCATGGCGACGGCATCCCCAACTTTGCCCATCATCTGAACAAATACGGGGTAGGCTTCTCCAG;CE=1.98041	GT:GL:GQ:FT:RCL:RC:RCR:CN:DR:DV:RR:RV	1/1:-45.6977,-3.91106,0:39:PASS:79:0:84:0:0:58:0:13	1/1:-68.5976,-5.71718,0:57:PASS:88:2:70:0:0:30:0:19	1/1:-208.993,-17.4528,0:10000:PASS:130:4:130:0:0:52:0:58	1/1:-221.89,-18.6543,0:10000:PASS:172:79:182:0:0:92:0:62	unitig_2	2294161	689	N	<DEL>	.	.	SVTYPE=DEL;STRANDS=+-:364;SVLEN=-675;END=2294836;CIPOS=0,0;CIEND=0,0;CIPOS95=0,0;CIEND95=0,0;SU=364;PE=232;SR=132	GT:SU:PE:SR	./.:64:56:8	./.:39:29:10	./.:111:53:58	./.:150:94:56
unitig_2	2299566	2300302	-	DEL	-	-	736	0	0	0	0	0			unitig_2	2299566	2300302	-	PM1118_GAP	-	-	unitig_2	2299564	DEL00001132	T	<DEL>	.	PASS	PRECISE;SVTYPE=DEL;SVMETHOD=EMBL.DELLYv0.7.7;CHR2=unitig_2;END=2300303;PE=15;MAPQ=60;CT=3to5;CIPOS=-3,3;CIEND=-3,3;INSLEN=0;HOMLEN=4;SR=10;SRQ=0.969231;CONSENSUS=GTCACCATTCAGAATCGTATCCACTGGAACGCATTCATCAGGATCCTACGGCCAGAGATCGAGAAGCGAGTCAAAAAATACGACGAGGCATGCTGACGATCAGGGTCAAAAAGAGGGAGAGTAGTCCTTGAATTCTTTTGATTAATGTATCATCAAATTATATGTCGGCTGTGACCTATTCACGACGTAGACC;CE=1.98286	GT:GL:GQ:FT:RCL:RC:RCR:CN:DR:DV:RR:RV	0/0:0,-4.21126,-49.7968:42:PASS:71:141:76:2:41:0:14:0	1/1:-46.9984,-3.91181,0:39:PASS:56:2:51:0:0:15:0:13	0/0:0,-6.62027,-80.5976:66:PASS:47:160:31:4:21:0:22:0	0/0:0,-7.82417,-96.3974:78:PASS:195:431:194:2:108:0:26:0	unitig_2	2299557	690	N	<DEL>	.	.	SVTYPE=DEL;STRANDS=+-:24;SVLEN=-745;END=2300302;CIPOS=-4,3;CIEND=-10,9;CIPOS95=0,0;CIEND95=0,0;SU=24;PE=16;SR=8	GT:SU:PE:SR	./.:0:0:0	./.:24:16:8	./.:0:0:0	./.:0:0:0
unitig_2	2464605	2465796	-	-	-	DEL	1191	0	0	0	0	0			unitig_2	2464605	2465796	-	-	-	PM449_GAP	unitig_2	2464605	DEL00001142	T	<DEL>	.	PASS	IMPRECISE;SVTYPE=DEL;SVMETHOD=EMBL.DELLYv0.7.7;CHR2=unitig_2;END=2465797;PE=103;MAPQ=60;CT=3to5;CIPOS=-50,50;CIEND=-50,50	GT:GL:GQ:FT:RCL:RC:RCR:CN:DR:DV:RR:RV	0/0:0,-10.4732,-175.137:105:PASS:100:229:134:2:35:0:0:0	0/0:0,-7.82053,-139.794:78:PASS:99:157:78:2:26:0:0:0	0/0:0,-9.63157,-188.499:96:PASS:106:171:62:2:32:0:0:0	1/1:-578.196,-31.0021,0:10000:PASS:391:0:409:0:0:103:0:0	unitig_2	2464604	694	N	<DEL>	.	.	SVTYPE=DEL;STRANDS=+-:146;SVLEN=-1192;END=2465796;CIPOS=0,0;CIEND=0,0;CIPOS95=0,0;CIEND95=0,0;SU=146;PE=104;SR=42	GT:SU:PE:SR	./.:0:0:0	./.:0:0:0	./.:0:0:0	./.:146:104:42
unitig_2	2572333	2572501	DEL	-	DEL	-	168	0	0	1	1	0	TM1119_g3383		unitig_2	2572333	2572501	PA7_GAP	-	PM448_GAP	-	unitig_2	2572331	DEL00001152	CGCCGCGCGCGCGGCCCCACTCGCCGATGCTGCGGACCTTGCCGGCCTCGACGGCCTCGACCAGCGCGCGCCATACCGCCTTGCGCGGCCGCGGGCCCGCCGTACGGGCTGTGCACGAGGAACAGGTCGACGTACGACAAGGCCCGTCTTGGCGAGCGTGCCGTCGGCCAG	C	.	PASS	PRECISE;SVTYPE=DEL;SVMETHOD=EMBL.DELLYv0.7.7;CHR2=unitig_2;END=2572502;PE=0;MAPQ=60;CT=3to5;CIPOS=-9,9;CIEND=-9,9;INSLEN=0;HOMLEN=14;SR=10;SRQ=0.987421;CONSENSUS=GCCAGCGCCTGGAGCACCGGCTCGCCCCATCGCTTGCCCCGGACCAGCGGGCAGCGGGCAGTAGGCCTGGACGGCCACGTCGCGCGCCGCCTCGTAGCTCATCTTGGTGTAGGGCACCTTGGACGTGAAGACGATCTGCTCGCGGGGGATGCTCGATGC;CE=1.87481	GT:GL:GQ:FT:RCL:RC:RCR:CN:DR:DV:RR:RV	1/1:-30.2974,-2.70665,0:27:PASS:1121:106:1544:0:0:0:0:9	0/0:0,-26.4691,-296.278:10000:PASS:9747:19949:12249:2:0:0:88:0	1/1:-303.171,-24.9674,0:10000:PASS:7752:1173:8573:0:0:0:1:93	./.:0,0,0:0:LowQual:3410:8529:4057:2:0:0:0:0	unitig_2	2572340	701	N	<DEL>	.	.	SVTYPE=DEL;STRANDS=+-:79;SVLEN=-154;END=2572494;CIPOS=0,0;CIEND=0,0;CIPOS95=0,0;CIEND95=0,0;SU=79;PE=0;SR=79	GT:SU:PE:SR	./.:4:0:4	./.:0:0:0	./.:75:0:75	./.:0:0:0
unitig_2	2613753	2614539	-	DEL	-	-	786	0	0	0	0	0			unitig_2	2613753	2614539	-	PM1118_GAP	-	-	unitig_2	2613748	DEL00001157	T	<DEL>	.	PASS	PRECISE;SVTYPE=DEL;SVMETHOD=EMBL.DELLYv0.7.7;CHR2=unitig_2;END=2614537;PE=18;MAPQ=60;CT=3to5;CIPOS=-5,5;CIEND=-5,5;INSLEN=0;HOMLEN=4;SR=10;SRQ=0.981707;CONSENSUS=TACAGCTCAGTCCCCATGTCGCATTCTGTGGATCTAAGGTCTGGATCTCATGCCTTATCGAACAGATACGAGGTTTCCCCTTCTGCTAGATCCTAGCAAACGAGTGAAGTGTACTAGTTTTGGTCCATCGTTCACTTCCAAATAAACGATCGAATCTGTCTCG;CE=1.98558	GT:GL:GQ:FT:RCL:RC:RCR:CN:DR:DV:RR:RV	0/0:0,-1.50435,-17.7992:15:PASS:56:176:64:3:29:0:5:0	1/1:-77.0978,-3.5213,0:35:PASS:33:2:77:0:0:18:1:22	0/0:0,-1.80538,-21.5992:18:PASS:41:42:49:1:5:0:6:0	0/0:0,-17.7548,-218.694:10000:PASS:169:445:196:2:77:0:59:0	unitig_2	2613752	704	N	<DEL>	.	.	SVTYPE=DEL;STRANDS=+-:36;SVLEN=-784;END=2614536;CIPOS=-10,9;CIEND=-2,0;CIPOS95=0,0;CIEND95=0,0;SU=36;PE=18;SR=18	GT:SU:PE:SR	./.:0:0:0	./.:36:18:18	./.:0:0:0	./.:0:0:0
unitig_2	2622859	2623361	-	DEL	-	-	502	0	0	0	0	0			unitig_2	2622859	2623361	-	PM1118_GAP	-	-	unitig_2	2622853	DEL00001158	C	<DEL>	.	PASS	PRECISE;SVTYPE=DEL;SVMETHOD=EMBL.DELLYv0.7.7;CHR2=unitig_2;END=2623362;PE=56;MAPQ=60;CT=3to5;CIPOS=-6,6;CIEND=-6,6;INSLEN=0;HOMLEN=5;SR=10;SRQ=0.97546;CONSENSUS=TTGTTTTCCCGGCACGCACCCCACCTAACTCGAGCATTGTTTACCTATTTATAGTAGGCGCGTCCGCCCGAACTGCTTCGAGTGCCTTCTCTAGGGAATGACAATATTCAGAGTTATTACAACAACAATCACTATGCACTGCCAGAACGATACAACCTTCAG;CE=1.97809	GT:GL:GQ:FT:RCL:RC:RCR:CN:DR:DV:RR:RV	0/0:0,-1.50438,-17.5992:15:PASS:54:96:41:2:35:0:5:0	1/1:-166.194,-13.8419,0:138:PASS:112:2:59:0:1:56:0:46	./.:0,0,0:0:LowQual:149:137:79:1:47:1:0:0	0/0:0,-7.52239,-88.8966:75:PASS:110:272:138:2:79:0:25:0	unitig_2	2622858	708	N	<DEL>	.	.	SVTYPE=DEL;STRANDS=+-:32;SVLEN=-503;END=2623361;CIPOS=-10,9;CIEND=-10,9;CIPOS95=0,0;CIEND95=0,0;SU=32;PE=0;SR=32	GT:SU:PE:SR	./.:0:0:0	./.:32:0:32	./.:0:0:0	./.:0:0:0
unitig_2	2651620	2656015	-	-	DEL	-	4395	0	0	0	0	3		TM1119_g3419;TM1119_g3420;TM1119_g3421	unitig_2	2651620	2656015	-	-	PM448_GAP	-	unitig_2	2651619	DEL00001161	G	<DEL>	.	PASS	PRECISE;SVTYPE=DEL;SVMETHOD=EMBL.DELLYv0.7.7;CHR2=unitig_2;END=2656016;PE=46;MAPQ=60;CT=3to5;CIPOS=-1,1;CIEND=-1,1;INSLEN=0;HOMLEN=0;SR=10;SRQ=0.9875;CONSENSUS=TTGTGGTGTCAGAGGGAAAGCAGGATGTGGATGTCGAGTTCAAAGAGACAGTCTGAAATCTAGGAGTCCATCCTAGTCAGAGGAATGAGTCAATTGCATTGGCATCGTTCCGGCGCGTGGCTGCGCAACGCCATTGTAATGGGTCCGTATATTTAGCGCC;CE=1.97955	GT:GL:GQ:FT:RCL:RC:RCR:CN:DR:DV:RR:RV	0/0:0,-3.30952,-38.7982:33:PASS:402:870:411:2:35:0:11:0	0/0:0,-7.52301,-92.0973:75:PASS:430:872:606:2:26:0:25:0	1/1:-175.393,-14.7434,0:147:PASS:765:0:897:0:0:44:0:49	0/0:0,-21.3644,-260.191:10000:PASS:1058:2301:1190:2:101:0:71:0	unitig_2	2651619	709	N	<DEL>	.	.	SVTYPE=DEL;STRANDS=+-:76;SVLEN=-4395;END=2656014;CIPOS=-1,0;CIEND=0,0;CIPOS95=0,0;CIEND95=0,1;IMPRECISE;SU=76;PE=48;SR=28	GT:SU:PE:SR	./.:0:0:0	./.:0:0:0	./.:76:48:28	./.:0:0:0
unitig_2	2715259	2715386	-	DEL	-	-	127	0	0	0	0	0			unitig_2	2715259	2715386	-	PM1118_GAP	-	-	unitig_2	2715250	DEL00001166	TCCCGATATCCGTAAATCTAAATGGTTTCAACTGTGTTTGTAACGGCGAAGCTCCTGTAGATCATGATAGTCCTGCGTCGATATTCAGCGAGGTATTCTACATATGCACATGAAGGAATACTAGAAGAAGCCATAAG	T	.	PASS	PRECISE;SVTYPE=DEL;SVMETHOD=EMBL.DELLYv0.7.7;CHR2=unitig_2;END=2715387;PE=0;MAPQ=60;CT=3to5;CIPOS=-9,9;CIEND=-9,9;INSLEN=0;HOMLEN=9;SR=10;SRQ=0.962766;CONSENSUS=ATCTCGTGTCGCCCCTATTACTTGATGGCCACAGCGAAGAGCGGCAAGCGCAAGTTGCAGGCCCAGACCAGAGCTTGCACCAGTGATGAGGAATCCAGTCATCCCGATATGTCCGGGACTAACTCCAAGGCAATGGATATACTTGTGATTTACACAACAATTGTTCCTAAGCTCGCGTTCGAAGATAA;CE=1.99526	GT:GL:GQ:FT:RCL:RC:RCR:CN:DR:DV:RR:RV	0/0:0,-2.10572,-24.6985:21:PASS:1154:2471:1478:2:0:0:7:0	1/1:-44.1988,-3.61112,0:36:PASS:2075:123:680:0:0:0:0:12	0/0:0,-0.902923,-11.6998:10:LowQual:3029:1696:709:1:0:0:3:0	0/0:0,-12.6371,-148.994:126:PASS:5518:11860:6927:2:0:0:42:0	unitig_2	2715258	710	N	<DEL>	.	.	SVTYPE=DEL;STRANDS=+-:12;SVLEN=-128;END=2715386;CIPOS=-4,2;CIEND=-3,2;CIPOS95=0,0;CIEND95=0,0;SU=12;PE=1;SR=11	GT:SU:PE:SR	./.:0:0:0	./.:12:1:11	./.:0:0:0	./.:0:0:0
unitig_2	3194582	3194985	-	-	DEL	-	403	1	0	1	2	0	TM1119_g3632;TM1119_g3633		unitig_2	3194582	3194985	-	-	PM448_GAP	-	unitig_2	3194579	DEL00001190	G	<DEL>	.	PASS	PRECISE;SVTYPE=DEL;SVMETHOD=EMBL.DELLYv0.7.7;CHR2=unitig_2;END=3194986;PE=33;MAPQ=60;CT=3to5;CIPOS=-3,3;CIEND=-3,3;INSLEN=0;HOMLEN=2;SR=10;SRQ=0.988827;CONSENSUS=TGCAGCACTGATCGACATTCCTCACATACACTTTGACGGAGTCTTCAAAGCTCTCCAGTCTAAGGAGTCACTATACAAATTCTTCAGGGTAGATCCGACTTTATCAATATCACTTTTCTGATTGCGATCAGCCTTGTGGGTGAGGATGAGGATGGCGACGAACATAGAGTCATTCGCTG;CE=1.99278	GT:GL:GQ:FT:RCL:RC:RCR:CN:DR:DV:RR:RV	0/0:0,-2.40698,-28.2987:24:PASS:3457:7431:4241:2:37:0:8:0	0/0:0,-4.81493,-59.0985:48:PASS:5134:7763:4313:2:17:0:16:0	1/1:-80.8961,-6.91978,0:69:PASS:2474:30:6975:0:0:32:0:23	0/0:0,-10.8332,-131.596:108:PASS:18414:32238:16557:2:112:0:36:0	unitig_2	3194581	684	N	<DEL>	.	.	SVTYPE=DEL;STRANDS=+-:49;SVLEN=-404;END=3194985;CIPOS=-10,9;CIEND=-10,9;CIPOS95=0,0;CIEND95=0,0;SU=49;PE=33;SR=16	GT:SU:PE:SR	./.:0:0:0	./.:0:0:0	./.:49:33:16	./.:0:0:0
unitig_2	3268760	3274037	-	DEL	-	DEL	5277	0	0	0	0	0			unitig_2	3268760	3274037	-	PM1118_GAP	-	PM449_GAP	unitig_2	3268754	DEL00001199	C	<DEL>	.	PASS	PRECISE;SVTYPE=DEL;SVMETHOD=EMBL.DELLYv0.7.7;CHR2=unitig_2;END=3274038;PE=50;MAPQ=60;CT=3to5;CIPOS=-8,8;CIEND=-8,8;INSLEN=0;HOMLEN=7;SR=10;SRQ=1;CONSENSUS=ACTGATACATGCTAACCCTTCGGGTCATCCCTGTCCGCCTCCATTTTTTTGGGGAGCGGAAACAATTGCTCTTTAGATTTGTCTTGACTGACGCGGCACCATCACCCTTTTCCCCCTTCCTGATTCCTATTCCTTTTCCTCCGCCATCTTCGAGAGTGTCTTTACTTCTTCTTCCCTCCTTT;CE=1.88236	GT:GL:GQ:FT:RCL:RC:RCR:CN:DR:DV:RR:RV	1/1:-50.2956,-4.5111,0:45:PASS:536:2220:555:4:0:51:0:15	1/1:-87.6962,-7.52196,0:75:PASS:777:0:677:0:0:50:0:25	1/1:-189.692,-15.9463,0:157:PASS:1258:257:1108:0:0:92:0:53	1/1:-232.089,-19.556,0:10000:PASS:1373:0:1398:0:0:65:0:65	unitig_2	3268759	719	N	<DEL>	.	.	SVTYPE=DEL;STRANDS=+-:383;SVLEN=-5278;END=3274037;CIPOS=0,0;CIEND=0,0;CIPOS95=0,0;CIEND95=0,0;SU=383;PE=262;SR=121	GT:SU:PE:SR	./.:63:53:10	./.:64:50:14	./.:133:93:40	./.:123:66:57
unitig_2	3410011	3411687	DEL	-	-	-	1676	0	0	0	0	1		TM1119_g3704	unitig_2	3410011	3411687	PA7_GAP	-	-	-	unitig_2	3410009	DEL00001210	G	<DEL>	.	PASS	PRECISE;SVTYPE=DEL;SVMETHOD=EMBL.DELLYv0.7.7;CHR2=unitig_2;END=3411688;PE=51;MAPQ=60;CT=3to5;CIPOS=-2,2;CIEND=-2,2;INSLEN=0;HOMLEN=2;SR=10;SRQ=0.957627;CONSENSUS=AGCTTAGCTGTTAATGTTAGTGTCTTTGAGCTGATAGCTCCCGACAACGTTTGGGGGATTCGAGTCACAGATTCAAAGTTTGGGAGCCGATGGTAAGAACGAGTCACTCCTGTGGATG;CE=1.97295	GT:GL:GQ:FT:RCL:RC:RCR:CN:DR:DV:RR:RV	1/1:-59.0952,-5.11275,0:51:PASS:186:0:157:0:0:51:0:17	0/0:0,-5.4165,-66.798:54:PASS:318:219:221:1:24:0:18:0	0/0:0,-1.20246,-12.6983:12:LowQual:384:143:224:0:12:0:4:0	0/0:0,-20.1615,-244.392:10000:PASS:405:995:448:2:120:0:67:0	unitig_2	3410010	721	N	<DEL>	.	.	SVTYPE=DEL;STRANDS=+-:55;SVLEN=-1677;END=3411687;CIPOS=-4,7;CIEND=-8,4;CIPOS95=0,0;CIEND95=0,0;SU=55;PE=51;SR=4	GT:SU:PE:SR	./.:55:51:4	./.:0:0:0	./.:0:0:0	./.:0:0:0
unitig_2	3433086	3434936	-	DEL	DEL	-	1850	0	0	0	0	0			unitig_2	3433086	3434936		PM1118_GAP	PM448_GAP		unitig_2	3433082	DEL00001215	A	<DEL>	.	PASS	PRECISE;SVTYPE=DEL;SVMETHOD=EMBL.DELLYv0.7.7;CHR2=unitig_2;END=3434941;PE=29;MAPQ=60;CT=3to5;CIPOS=-4,4;CIEND=-4,4;INSLEN=0;HOMLEN=6;SR=10;SRQ=1;CONSENSUS=CCACCCGAGCGGAATCCAGCAGCATTGATTGAAAAAAAACTGCGACATATCCCATCTACTCGTCATGACGTGACTATCTACTACGGATCTAGGTATTAGCTCCATGCTAGAATCTTTCCAAGCATTGTTATCTTTTACCTAGATTGATAGTTACATCAGCTATGGAAGAGTAGTCTGTTCAATGCCGAGAGGCCTTCTTGACACTATTTTGCTGATA;CE=1.97777	GT:GL:GQ:FT:RCL:RC:RCR:CN:DR:DV:RR:RV	1/1:-42.4975,-3.60984,0:36:PASS:198:41:204:0:0:56:0:12	1/1:-64.7962,-2.81766,0:28:PASS:354:1:116:0:0:29:1:20	1/1:-10.5996,-0.902693,0:10:LowQual:423:0:84:0:0:15:0:3	1/1:-198.093,-16.5496,0:10000:PASS:403:1205:495:3:0:84:0:55	unitig_2	3433085	723	N	<DEL>	.	.	SVTYPE=DEL;STRANDS=+-:251;SVLEN=-1855;END=3434940;CIPOS=0,0;CIEND=0,0;CIPOS95=0,0;CIEND95=0,0;SU=251;PE=185;SR=66	GT:SU:PE:SR	./.:62:56:6	./.:42:29:13	./.:18:15:3	./.:129:85:44
unitig_2	3714633	3715737	-	-	DEL	-	1104	0	0	0	0	0			unitig_2	3714633	3715737	-	-	PM448_GAP	-	unitig_2	3714630	DEL00001236	T	<DEL>	.	PASS	PRECISE;SVTYPE=DEL;SVMETHOD=EMBL.DELLYv0.7.7;CHR2=unitig_2;END=3715738;PE=24;MAPQ=60;CT=3to5;CIPOS=-5,5;CIEND=-5,5;INSLEN=0;HOMLEN=4;SR=10;SRQ=0.962567;CONSENSUS=TTTTCAGGTGGCATATGATATTCGGGTGTTTACTACGTTGTTATCCGTGGGAACAAGCTGCCACCGTGACAGCCGCCCACTATTTAGTCTGCTATCTATCTACGGTCGCTATCTATTGGACAGTGGCATCTAACAACTCCGAAGCCGGGTCTCTTGCAGTTCGGCCCTCGCAATCCCCGCAAATG;CE=1.98747	GT:GL:GQ:FT:RCL:RC:RCR:CN:DR:DV:RR:RV	0/0:0,-4.51251,-52.6971:45:PASS:139:261:147:2:58:0:15:0	0/0:0,-5.11542,-60.8979:51:PASS:98:133:72:2:23:0:17:0	1/1:-71.4974,-3.11993,0:31:PASS:119:1:105:0:0:24:1:21	0/0:0,-23.7716,-285.19:10000:PASS:335:680:312:2:119:0:79:0	unitig_2	3714614	727	N	<DEL>	.	.	SVTYPE=DEL;STRANDS=+-:44;SVLEN=-1122;END=3715736;CIPOS=-2,0;CIEND=-1,0;CIPOS95=0,0;CIEND95=0,1;IMPRECISE;SU=44;PE=25;SR=19	GT:SU:PE:SR	./.:0:0:0	./.:0:0:0	./.:44:25:19	./.:0:0:0
unitig_2	3918612	3918801	-	DEL	-	-	189	0	0	0	0	0			unitig_2	3918612	3918801	-	PM1118_GAP	-	-	unitig_2	3918608	DEL00001254	TGCAGTGGAGAAAGAGCAGACTGGTGCCACCTCGCGAGTATTCGGGTCGCGAGCGTTTATGTGTAAGAGTCATCAATGCTGAACTAACCAATCTTACTCAATTATGAATCTGTTCATCGTCTTCTTCTAATGAAGTACTCTTAGGGATGTTGGGGCTGAGCAAAGAGGATATAATTTGCCCTATAATTCACGAG	T	.	PASS	PRECISE;SVTYPE=DEL;SVMETHOD=EMBL.DELLYv0.7.7;CHR2=unitig_2;END=3918802;PE=0;MAPQ=60;CT=3to5;CIPOS=-5,5;CIEND=-5,5;INSLEN=0;HOMLEN=4;SR=10;SRQ=0.988506;CONSENSUS=AGCCTTAACACTTTTCACATTGGCTGCATTGTGGATTTTGCCGTGTCTCTACGCACGCCTTGACTATACAGGTAGATCTACTATTCCGGGATTACTTGCAAGCAAGCTGCACAAGGGAGTTACACAAAGTGAAGGACAATGCTGGTGACTCTTTGAGAGTAAGAGAAGCCCAAT;CE=1.99338	GT:GL:GQ:FT:RCL:RC:RCR:CN:DR:DV:RR:RV	0/0:0,-4.8141,-58.6976:48:PASS:2196:4306:2296:2:0:0:16:0	1/1:-61.7979,-5.11544,0:51:PASS:1609:39:1642:0:0:0:0:17	0/0:0,-4.21213,-51.0977:42:PASS:2024:4511:983:3:0:0:14:0	0/0:0,-18.9581,-231.793:10000:PASS:7126:16517:7523:2:0:0:63:0	unitig_2	3918611	728	N	<DEL>	.	.	SVTYPE=DEL;STRANDS=+-:11;SVLEN=-190;END=3918801;CIPOS=-3,2;CIEND=-3,2;CIPOS95=0,0;CIEND95=0,0;SU=11;PE=0;SR=11	GT:SU:PE:SR	./.:0:0:0	./.:11:0:11	./.:0:0:0	./.:0:0:0
unitig_2	4009927	4012247	-	DEL	-	-	2320	1	0	0	1	1	TM1119_g3892	TM1119_g3891	unitig_2	4009927	4012247	-	PM1118_GAP	-	-	unitig_2	4009923	DEL00001262	T	<DEL>	.	PASS	PRECISE;SVTYPE=DEL;SVMETHOD=EMBL.DELLYv0.7.7;CHR2=unitig_2;END=4012248;PE=30;MAPQ=60;CT=3to5;CIPOS=-5,5;CIEND=-5,5;INSLEN=0;HOMLEN=4;SR=10;SRQ=0.981013;CONSENSUS=CATGTCAGTGACCATCGGGGGTTTGATGCCATTGTCGGCATTGTTGAAGGGGCGTACTCACACATGGTCCGGAAGGTCTGCTTATCTTGCCGTTGAGGATCGAATCGTCGAGGTAGCTGTCAAAGAGTATAGCGACGGCGATACATTGATGTGGGAAT;CE=1.97149	GT:GL:GQ:FT:RCL:RC:RCR:CN:DR:DV:RR:RV	./.:0,0,0:0:LowQual:306:0:0:0:0:0:0:0	1/1:-109.094,-9.32592,0:93:PASS:182:4:652:0:0:30:0:31	./.:0,0,0:0:LowQual:158:0:4:0:0:0:0:0	./.:0,0,0:0:LowQual:692:2:4:0:0:0:0:0	unitig_2	4009926	731	N	<DEL>	.	.	SVTYPE=DEL;STRANDS=+-:56;SVLEN=-2321;END=4012247;CIPOS=-1,0;CIEND=-10,9;CIPOS95=0,0;CIEND95=0,0;SU=56;PE=30;SR=26	GT:SU:PE:SR	./.:0:0:0	./.:56:30:26	./.:0:0:0	./.:0:0:0
unitig_2	4009931	4021927	DEL	-	DEL	DEL	11996	1	0	0	1	5	TM1119_g3897	TM1119_g3891;TM1119_g3892;TM1119_g3893;TM1119_g3894;TM1119_g3896	unitig_2	4009931	4021927	PA7_GAP	-	PM448_GAP	PM449_GAP	unitig_2	4009929	DEL00001263	T	<DEL>	.	PASS	PRECISE;SVTYPE=DEL;SVMETHOD=EMBL.DELLYv0.7.7;CHR2=unitig_2;END=4021928;PE=49;MAPQ=60;CT=3to5;CIPOS=-2,2;CIEND=-2,2;INSLEN=0;HOMLEN=1;SR=10;SRQ=0.984496;CONSENSUS=GCCATTGTCGGCATTGTTGAAGGGGAATACTCACACATGGTCCGGAAGGTCTGCTTATTCTGATCGCTGGGATCGAAGTTCGGTGCTACGACAGCAAAGCCGATCATCACACCCAGGTGTCCGGCTCTT;CE=1.99426	GT:GL:GQ:FT:RCL:RC:RCR:CN:DR:DV:RR:RV	1/1:-41.6978,-3.6102,0:36:PASS:1421:0:1391:0:0:49:0:12	0/0:0,-3.00953,-38.0992:30:PASS:1679:2723:1413:2:0:0:10:0	1/1:-21.8993,-1.8055,0:18:PASS:2205:10:2086:0:0:7:0:6	1/1:-228.492,-19.2575,0:10000:PASS:3089:10:3059:0:0:105:0:64	unitig_2	4009930	732	N	<DEL>	.	.	SVTYPE=DEL;STRANDS=+-:224;SVLEN=-11997;END=4021927;CIPOS=0,0;CIEND=0,0;CIPOS95=0,0;CIEND95=0,0;SU=224;PE=162;SR=62	GT:SU:PE:SR	./.:55:49:6	./.:0:0:0	./.:12:7:5	./.:157:106:51
unitig_2	4118254	4118489	-	DEL	-	-	235	0	0	0	0	0			unitig_2	4118254	4118489		PM1118_GAP			unitig_2	4118250	DEL00001273	ATACAGTGGGTGGCAAAAAGTTTGAATCCAAAGTGAAGTAGCTAATTTCGGGTAAAGTCTTGGCAATAATCACTCTAGGCTCAAAATAGTACACCCCTAACCCTAACCCTCAACTTTTCAGTACACTAGGGTTAGGGTTAGGGTTAGGGGTATACTATATTAGGATTAGGGTGACTGCTGCCAAGACTTTACTCGAAATTAGCTACTTCACTTTGGATTCAAACTTTTTGCCACCCACTG	A	.	PASS	PRECISE;SVTYPE=DEL;SVMETHOD=EMBL.DELLYv0.7.7;CHR2=unitig_2;END=4118490;PE=0;MAPQ=60;CT=3to5;CIPOS=-5,5;CIEND=-5,5;INSLEN=0;HOMLEN=5;SR=10;SRQ=1;CONSENSUS=CCATCAGGCCGCTTTGTCATCCTCCCCTTCCCCGATCCAGCTGGGGGGGACCAGATCTTAAAGATCTTGCATCTACGATATACCATCAAGCAAGCTATCCCAACAGCCTCCAGAAAGGCTTTGCTCTTGAAATGACTGTCTGCTATTCTCGATAATCCGTCGAT;CE=1.97747	GT:GL:GQ:FT:RCL:RC:RCR:CN:DR:DV:RR:RV	1/1:-97.1961,-8.12388,0:81:PASS:3012:369:3263:0:0:0:0:27	1/1:-105.395,-9.02588,0:90:PASS:4123:78:3651:0:0:0:0:30	1/1:-165.391,-14.4402,0:144:PASS:3678:90:8659:0:0:0:0:48	1/1:-250.992,-20.7629,0:10000:PASS:8865:6838:6453:1:0:0:0:69	unitig_2	4118253	735	N	<DEL>	.	.	SVTYPE=DEL;STRANDS=+-:138;SVLEN=-236;END=4118489;CIPOS=0,0;CIEND=0,0;CIPOS95=0,0;CIEND95=0,0;SU=138;PE=0;SR=138	GT:SU:PE:SR	./.:19:0:19	./.:25:0:25	./.:39:0:39	./.:55:0:55
unitig_2	4157549	4159415	DEL	-	-	DEL	1866	0	0	0	0	0			unitig_2	4157549	4159415	PA7_GAP	-	-	PM449_GAP	unitig_2	4157545	DEL00001276	G	<DEL>	.	PASS	PRECISE;SVTYPE=DEL;SVMETHOD=EMBL.DELLYv0.7.7;CHR2=unitig_2;END=4159416;PE=57;MAPQ=60;CT=3to5;CIPOS=-5,5;CIEND=-5,5;INSLEN=0;HOMLEN=6;SR=10;SRQ=1;CONSENSUS=GGCTATAGACTTTGTATGGCTTGGGTGGCCTTTGGGATATGTGTAATGGATTAATGATATATATATATATACCTCGTTAACAAGAAGGTTACTTGGAGATCTGACACGTTTCTGTGATTATT;CE=1.89309	GT:GL:GQ:FT:RCL:RC:RCR:CN:DR:DV:RR:RV	1/1:-39.6986,-3.30992,0:33:PASS:212:12:201:0:0:57:0:11	./.:0,0,0:0:LowQual:299:83:110:0:0:13:0:0	./.:0,0,0:0:LowQual:345:9:119:0:0:15:0:0	1/1:-226.191,-18.6546,0:10000:PASS:409:81:501:0:0:80:0:62	unitig_2	4157548	741	N	<DEL>	.	.	SVTYPE=DEL;STRANDS=+-:233;SVLEN=-1867;END=4159415;CIPOS=0,0;CIEND=0,0;CIPOS95=0,0;CIEND95=0,0;SU=233;PE=167;SR=66	GT:SU:PE:SR	./.:67:58:9	./.:16:13:3	./.:19:15:4	./.:130:80:50
unitig_2	4167385	4168121	-	DEL	-	-	736	0	0	1	1	0	TM1119_g3941		unitig_2	4167385	4168121	-	PM1118_GAP	-	-	unitig_2	4167384	DEL00001277	G	<DEL>	.	PASS	PRECISE;SVTYPE=DEL;SVMETHOD=EMBL.DELLYv0.7.7;CHR2=unitig_2;END=4168122;PE=45;MAPQ=60;CT=3to5;CIPOS=-2,2;CIEND=-2,2;INSLEN=0;HOMLEN=1;SR=10;SRQ=1;CONSENSUS=AACTATGATGCTGTGGCAGCTTATGCCTTAAGTAAGACGGCCAATCTGTGGACTGCGAACGAAATCGAACGCCGGTATGGTGACCCACATTGGTGGGTGAATGGAAGGAAAGCCGAAACGGAAGGTGCACGGTTAGCAGATCGTCCCGTCAGCCTAAAACCTAAAATAGC;CE=1.97628	GT:GL:GQ:FT:RCL:RC:RCR:CN:DR:DV:RR:RV	0/0:0,-4.51363,-54.6982:45:PASS:105:204:89:2:60:0:15:0	1/1:-163.295,-13.541,0:135:PASS:93:1:165:0:0:45:0:45	0/0:0,-9.92979,-118.696:99:PASS:115:125:132:1:22:0:33:0	0/0:0,-21.9635,-256.688:10000:PASS:205:470:201:2:129:0:73:0	unitig_2	4167384	743	N	<DEL>	.	.	SVTYPE=DEL;STRANDS=+-:78;SVLEN=-736;END=4168120;CIPOS=-2,0;CIEND=0,0;CIPOS95=0,0;CIEND95=0,1;IMPRECISE;SU=78;PE=45;SR=33	GT:SU:PE:SR	./.:0:0:0	./.:78:45:33	./.:0:0:0	./.:0:0:0
unitig_2	4226309	4230366	DEL	-	-	DEL	4057	0	0	0	0	1		TM1119_g3962	unitig_2	4226309	4230366	PA7_GAP	-	-	PM449_GAP	unitig_2	4226302	DEL00001280	A	<DEL>	.	PASS	IMPRECISE;SVTYPE=DEL;SVMETHOD=EMBL.DELLYv0.7.7;CHR2=unitig_2;END=4230367;PE=33;MAPQ=60;CT=3to5;CIPOS=-312,312;CIEND=-312,312	GT:GL:GQ:FT:RCL:RC:RCR:CN:DR:DV:RR:RV	1/1:-126.799,-7.2237,0:72:PASS:495:0:509:0:0:24:0:0	0/0:0,-6.62265,-132:66:PASS:371:531:342:1:22:0:0:0	./.:0,0,0:0:LowQual:490:0:154:0:0:0:0:0	1/1:-178.299,-9.93288,0:99:PASS:991:2:989:0:0:33:0:0	unitig_2	4226307	744	N	<DEL>	.	.	SVTYPE=DEL;STRANDS=+-:58;SVLEN=-4059;END=4230366;CIPOS=-10,452;CIEND=-440,9;CIPOS95=0,170;CIEND95=-158,0;IMPRECISE;SU=58;PE=58;SR=0	GT:SU:PE:SR	./.:24:24:0	./.:0:0:0	./.:0:0:0	./.:34:34:0
unitig_2	4230786	4231166	-	-	-	DEL	380	0	0	0	0	0			unitig_2	4230786	4231166	-	-	-	PM449_GAP	unitig_2	4230786	DEL00001281	T	<DEL>	.	PASS	IMPRECISE;SVTYPE=DEL;SVMETHOD=EMBL.DELLYv0.7.7;CHR2=unitig_2;END=4231167;PE=82;MAPQ=60;CT=3to5;CIPOS=-58,58;CIEND=-58,58	GT:GL:GQ:FT:RCL:RC:RCR:CN:DR:DV:RR:RV	0/0:0,-11.4273,-200.088:114:PASS:4721:8659:3965:2:38:0:0:0	0/0:0,-6.62265,-132:66:PASS:3901:6716:2544:2:22:0:0:0	./.:0,0,0:0:LowQual:0:0:0:-1:0:0:0:0	1/1:-488.2,-19.2864,0:10000:PASS:15397:53:17131:0:1:83:0:0	unitig_2	4230785	745	N	<DEL>	.	.	SVTYPE=DEL;STRANDS=+-:67;SVLEN=-381;END=4231166;CIPOS=0,0;CIEND=0,0;CIPOS95=0,0;CIEND95=0,0;SU=67;PE=6;SR=61	GT:SU:PE:SR	./.:0:0:0	./.:0:0:0	./.:0:0:0	./.:67:6:61
unitig_2	4336137	4341349	DEL	DEL	-	DEL	5212	0	0	0	0	1		TM1119_g3998	unitig_2	4336137	4341349	PA7_GAP	PM1118_GAP	-	PM449_GAP	unitig_2	4336137	DEL00001290	G	<DEL>	.	PASS	IMPRECISE;SVTYPE=DEL;SVMETHOD=EMBL.DELLYv0.7.7;CHR2=unitig_2;END=4341381;PE=82;MAPQ=60;CT=3to5;CIPOS=-178,178;CIEND=-178,178	GT:GL:GQ:FT:RCL:RC:RCR:CN:DR:DV:RR:RV	1/1:-188.099,-10.5351,0:105:PASS:684:0:694:0:0:35:0:0	1/1:-51.1997,-2.70899,0:27:PASS:522:7:396:0:0:9:0:0	0/0:0,-3.9099,-71.5965:39:PASS:759:226:603:0:13:0:0:0	1/1:-454.098,-24.6828,0:10000:PASS:1495:0:1411:0:0:82:0:0	unitig_2	4336135	746	N	<DEL>	.	.	SVTYPE=DEL;STRANDS=+-:126;SVLEN=-5215;END=4341350;CIPOS=-1,237;CIEND=-191,9;CIPOS95=0,83;CIEND95=-68,2;IMPRECISE;SU=126;PE=126;SR=0	GT:SU:PE:SR	./.:35:35:0	./.:9:9:0	./.:0:0:0	./.:82:82:0
unitig_2	4386623	4387377	-	-	DEL	-	754	0	0	0	0	0			unitig_2	4386623	4387377	-	-	PM448_GAP	-	unitig_2	4386619	DEL00001295	C	<DEL>	.	PASS	PRECISE;SVTYPE=DEL;SVMETHOD=EMBL.DELLYv0.7.7;CHR2=unitig_2;END=4387378;PE=11;MAPQ=60;CT=3to5;CIPOS=-5,5;CIEND=-5,5;INSLEN=0;HOMLEN=4;SR=10;SRQ=0.961957;CONSENSUS=GTGGTGGAAGCGCAGTGGCATTCAACCAAGCCCACGCTCATAGACACTGCACAATTATTCATGCTTGTCACTGTACTTGAGAATTACCATGGGACTATGAAGACATCGAGAACTATGTTTCAATAATTTAGGTGGATTATTGTCAGACCCTGGCTCGGGAATCGCTCCTTGGTCTATTGATTCT;CE=1.98988	GT:GL:GQ:FT:RCL:RC:RCR:CN:DR:DV:RR:RV	0/0:0,-1.80561,-22.4994:18:PASS:84:168:101:2:47:0:6:0	0/0:0,-3.61128,-44.8989:36:PASS:53:80:43:2:17:0:12:0	1/1:-35.5987,-3.00904,0:30:PASS:40:0:40:0:0:11:0:10	0/0:0,-23.4717,-287.691:10000:PASS:208:438:213:2:113:0:78:0	unitig_2	4386622	749	N	<DEL>	.	.	SVTYPE=DEL;STRANDS=+-:19;SVLEN=-755;END=4387377;CIPOS=-10,9;CIEND=-10,9;CIPOS95=0,0;CIEND95=0,0;SU=19;PE=12;SR=7	GT:SU:PE:SR	./.:0:0:0	./.:0:0:0	./.:19:12:7	./.:0:0:0
unitig_2	4612905	4613241	DEL	-	DEL	DEL	336	0	0	0	0	0			unitig_2	4612905	4613241	PA7_GAP	-	PM448_GAP	PM449_GAP	unitig_2	4612904	DEL00001306	CGAAGATGTTTTTCTGTCGATCTTGTGCCTCCATAAAAAACTGAGAAAGATGAGTGAAGAGATACTGGGAGAGCAACATGGGCGTGAAGTTATGTTTAGACAAATTTTCAAGAGTGGTTGGCAATATTAAGTGAGGGCAGCGTAAAAGACGCGCTCTCTCAGAATTAGAATGATGTGGCTTACACACTGTGCTAAGAGTAAAGCACCGTTTTCCTTACCTGCAACGGTATGCTGAACTTATAGATTAGCCCTTTCATTTGAAACTCCCTACGGGGTGAGAGCTGAATCTAAATTAAAAAGAGTGTACTCTCCTAACATATTGAGAGCTAGAAGTTGAA	C	.	PASS	PRECISE;SVTYPE=DEL;SVMETHOD=EMBL.DELLYv0.7.7;CHR2=unitig_2;END=4613242;PE=0;MAPQ=60;CT=3to5;CIPOS=-1,1;CIEND=-1,1;INSLEN=0;HOMLEN=0;SR=10;SRQ=0.990909;CONSENSUS=ATTTATTTGCTATCAACATAATTGTTCGGATTGAATGGATTTGCACCCTTCATGCATTGTCGTCTTATTGTATACCTTACTGTATAGTATTGTAGAAACTATAACTTCCA;CE=1.8809	GT:GL:GQ:FT:RCL:RC:RCR:CN:DR:DV:RR:RV	1/1:-79.3963,-6.61896,0:66:PASS:3729:14:3656:0:0:0:0:22	0/0:0,-2.70786,-31.7986:27:PASS:2755:4736:1986:2:0:0:9:0	1/1:-41.8982,-3.61058,0:36:PASS:5720:3:2543:0:0:0:0:12	1/1:-319.49,-26.1798,0:10000:PASS:12036:44:13287:0:0:0:0:87	unitig_2	4612904	751	N	<DEL>	.	.	SVTYPE=DEL;STRANDS=+-:94;SVLEN=-337;END=4613241;CIPOS=0,0;CIEND=0,0;CIPOS95=0,0;CIEND95=0,0;SU=94;PE=15;SR=79	GT:SU:PE:SR	./.:12:0:12	./.:0:0:0	./.:17:14:3	./.:65:1:64
unitig_2	4637068	4637154	-	-	DEL	-	86	0	0	0	0	0			unitig_2	4637068	4637154	-	-	PM448_GAP	-	unitig_2	4637067	DEL00001309	AGTTTTGAATCGACTTGATGTGACGGACTTACAGCGTCCTTGTGCTCTCGCGAATGGACTGGTGCGTCTCGCTGGGGCTGCCGCCACG	A	.	PASS	PRECISE;SVTYPE=DEL;SVMETHOD=EMBL.DELLYv0.7.7;CHR2=unitig_2;END=4637155;PE=0;MAPQ=60;CT=3to5;CIPOS=-2,2;CIEND=-2,2;INSLEN=0;HOMLEN=2;SR=10;SRQ=0.95092;CONSENSUS=TCATATGGGATCTTATATTCTAGTGCTAGGATGTAGGGCTAGAGTTAATACAAGCAGCCTTCACAAGCGCGGCTTCCATCATCATGCCTGCTGCAGTGAGGCTATCGGCACTGCCGTGATGTTCCTTTTTTAGGCTCAATCGAAAGCGCTATTTATCTA;CE=1.98749	GT:GL:GQ:FT:RCL:RC:RCR:CN:DR:DV:RR:RV	0/0:0,-4.51258,-53.0971:45:PASS:1158:1738:728:2:0:0:15:0	0/0:0,-7.52259,-90.5968:75:PASS:2597:5160:2798:2:0:0:25:0	1/1:-245.993,-20.1617,0:10000:PASS:3461:37:1743:0:0:0:0:67	0/0:0,-11.132,-129.294:111:PASS:3194:7696:4049:2:0:0:37:0	unitig_2	4637067	752	N	<DEL>	.	.	SVTYPE=DEL;STRANDS=+-:50;SVLEN=-87;END=4637154;CIPOS=0,0;CIEND=0,0;CIPOS95=0,0;CIEND95=0,0;SU=50;PE=1;SR=49	GT:SU:PE:SR	./.:0:0:0	./.:0:0:0	./.:50:1:49	./.:0:0:0
unitig_2	4766243	4766375	DEL	-	-	-	132	0	0	1	1	0	TM1119_g4147		unitig_2	4766243	4766375	PA7_GAP	-	-	-	unitig_2	4766242	DEL00001313	TGTGCTGGGTTTAACCTACAATCCCCCCAGTGAATGGGTGCTCACCCATGCCGACACTGTTTCTCAGCCCATATCCCAGTACAGTTCCGTCTCTGGCCATATCTGCTGGGGTCTGCATGATCTGCGATATCTTG	T	.	PASS	PRECISE;SVTYPE=DEL;SVMETHOD=EMBL.DELLYv0.7.7;CHR2=unitig_2;END=4766376;PE=0;MAPQ=60;CT=3to5;CIPOS=-1,1;CIEND=-1,1;INSLEN=0;HOMLEN=0;SR=10;SRQ=0.984;CONSENSUS=CGCCTGACATCGTCCATACTGTTTTCAACAGACCACTACAATCTTGTTAACGCGGAGAGACAACAACTTAGTATTTGATGATGCTGCGTCCTGCAGTTGGGCTTGTCGTAGCTGCGTCAATGTTG;CE=1.99203	GT:GL:GQ:FT:RCL:RC:RCR:CN:DR:DV:RR:RV	1/1:-37.3991,-3.00935,0:30:PASS:1204:6:1025:0:0:0:0:10	0/0:0,-3.61083,-42.7985:36:PASS:2595:5338:2389:2:0:0:12:0	0/0:0,-7.22129,-85.5966:72:PASS:4335:8081:4206:2:0:0:24:0	0/0:0,-20.4603,-241.19:10000:PASS:5466:11194:5946:2:0:0:68:0	unitig_2	4766242	754	N	<DEL>	.	.	SVTYPE=DEL;STRANDS=+-:6;SVLEN=-133;END=4766375;CIPOS=-6,5;CIEND=-6,5;CIPOS95=0,0;CIEND95=0,0;SU=6;PE=0;SR=6	GT:SU:PE:SR	./.:6:0:6	./.:0:0:0	./.:0:0:0	./.:0:0:0
unitig_2	4796181	4796442	-	-	DEL	DEL	261	0	0	0	0	0			unitig_2	4796181	4796442			PM448_GAP	PM449_GAP	unitig_2	4796173	DEL00001317	TAGGTCCCCTCGCTCACAACAAAAAAACGCGCACCGCAAAACCCCGTGTTTTCTGCCAAATTGGGACAAGCCTCAGAATTTCCAGAATTTCTCTTAGCTTCAACAACCACAAATAAAGACTTGAGGAAATTTACAAGATACTAGATAACTCACTAAAGTACCTAGTATTTAATGAGATTTTTTCAAGATTATAATATACGGTGGTTGTTGAGAAATTGGTAGAGAAAGGTGTGAAGTTCTAACGCAGTCCGCGTTTTTTTGTCGGGAGCG	T	.	PASS	PRECISE;SVTYPE=DEL;SVMETHOD=EMBL.DELLYv0.7.7;CHR2=unitig_2;END=4796443;PE=0;MAPQ=60;CT=3to5;CIPOS=-9,9;CIEND=-9,9;INSLEN=0;HOMLEN=9;SR=10;SRQ=1;CONSENSUS=GCAGATGCGGCCGCCAGTGCGCTCCCGTATGACAAGCGGATACTAGGGTTGGCTCCATAACCCTAGGACCCTACCATGTTCTAGGTCCCTTGTCACTTTGCCCATTCAATTCATGCTCTTCTCCACTAGCTTCGTTCGCCAAAGCCATTAATCCTGCTACGATAGT;CE=1.97347	GT:GL:GQ:FT:RCL:RC:RCR:CN:DR:DV:RR:RV	1/1:-77.1957,-6.61839,0:66:PASS:3021:2912:3397:1:0:0:0:22	1/1:-76.4966,-6.61921,0:66:PASS:2763:31054:1938:13:0:0:0:22	1/1:-149.894,-12.6376,0:126:PASS:6549:1033:3098:0:0:0:0:42	1/1:-215.793,-14.8558,0:149:PASS:9621:2173:9140:0:0:0:1:60	unitig_2	4796180	757	N	<DEL>	.	.	SVTYPE=DEL;STRANDS=+-:127;SVLEN=-262;END=4796442;CIPOS=0,0;CIEND=0,0;CIPOS95=0,0;CIEND95=0,0;SU=127;PE=3;SR=124	GT:SU:PE:SR	./.:20:0:20	./.:19:0:19	./.:39:2:37	./.:48:1:47
unitig_2	4847685	4848495	DEL	-	-	-	810	0	0	0	0	0			unitig_2	4847685	4848495	PA7_GAP	-	-	-	unitig_2	4847712	DEL00001325	C	<DEL>	.	PASS	IMPRECISE;SVTYPE=DEL;SVMETHOD=EMBL.DELLYv0.7.7;CHR2=unitig_2;END=4848502;PE=90;MAPQ=60;CT=3to5;CIPOS=-62,62;CIEND=-62,62	GT:GL:GQ:FT:RCL:RC:RCR:CN:DR:DV:RR:RV	1/1:-311.299,-17.1581,0:10000:PASS:105:0:124:0:0:57:0:0	0/0:0,-1.80618,-35.3:18:PASS:94:111:47:2:6:0:0:0	1/1:-174.3,-9.03085,0:90:PASS:114:0:97:0:0:30:0:0	1/1:-524.4,-27.0925,0:10000:PASS:229:0:243:0:0:90:0:0	unitig_2	4847710	759	N	<DEL>	.	.	SVTYPE=DEL;STRANDS=+-:182;SVLEN=-791;END=4848501;CIPOS=-10,180;CIEND=-130,1;CIPOS95=-2,38;CIEND95=-34,1;IMPRECISE;SU=182;PE=182;SR=0	GT:SU:PE:SR	./.:58:58:0	./.:0:0:0	./.:33:33:0	./.:91:91:0
unitig_2	4847709	4848495	-	-	DEL	DEL	786	0	0	0	0	0			unitig_2	4847709	4848495	-	-	PM448_GAP	PM449_GAP	unitig_2	4847712	DEL00001325	C	<DEL>	.	PASS	IMPRECISE;SVTYPE=DEL;SVMETHOD=EMBL.DELLYv0.7.7;CHR2=unitig_2;END=4848502;PE=90;MAPQ=60;CT=3to5;CIPOS=-62,62;CIEND=-62,62	GT:GL:GQ:FT:RCL:RC:RCR:CN:DR:DV:RR:RV	1/1:-311.299,-17.1581,0:10000:PASS:105:0:124:0:0:57:0:0	0/0:0,-1.80618,-35.3:18:PASS:94:111:47:2:6:0:0:0	1/1:-174.3,-9.03085,0:90:PASS:114:0:97:0:0:30:0:0	1/1:-524.4,-27.0925,0:10000:PASS:229:0:243:0:0:90:0:0	unitig_2	4847710	759	N	<DEL>	.	.	SVTYPE=DEL;STRANDS=+-:182;SVLEN=-791;END=4848501;CIPOS=-10,180;CIEND=-130,1;CIPOS95=-2,38;CIEND95=-34,1;IMPRECISE;SU=182;PE=182;SR=0	GT:SU:PE:SR	./.:58:58:0	./.:0:0:0	./.:33:33:0	./.:91:91:0
unitig_2	5109533	5113173	DEL	-	DEL	DEL	3640	0	1	0	1	0	TM1119_g4263		unitig_2	5109533	5113173	PA7_GAP	-	PM448_GAP	PM449_GAP	unitig_2	5109527	DEL00001332	G	<DEL>	.	PASS	PRECISE;SVTYPE=DEL;SVMETHOD=EMBL.DELLYv0.7.7;CHR2=unitig_2;END=5113174;PE=41;MAPQ=60;CT=3to5;CIPOS=-6,6;CIEND=-6,6;INSLEN=0;HOMLEN=8;SR=10;SRQ=0.981818;CONSENSUS=CCTCCGGTGGATCCCAGAAGATATCGAAGCCTGTTCCGCCAGGCTGAACAACGATATTAGATTCAGATTTATTATATCTTTCTATTTACTACTATACAGTCTTTTAAGAG;CE=1.95911	GT:GL:GQ:FT:RCL:RC:RCR:CN:DR:DV:RR:RV	1/1:-61.0975,-5.11503,0:51:PASS:506:0:453:0:0:41:0:17	0/0:0,-5.71734,-70.1978:57:PASS:644:663:503:1:21:0:19:0	1/1:-30.5994,-2.40763,0:24:PASS:714:4:683:0:0:23:0:8	1/1:-211.796,-14.7547,0:148:PASS:940:0:943:0:0:81:1:57	unitig_2	5109532	761	N	<DEL>	.	.	SVTYPE=DEL;STRANDS=+-:195;SVLEN=-3641;END=5113173;CIPOS=0,0;CIEND=0,0;CIPOS95=0,0;CIEND95=0,0;SU=195;PE=145;SR=50	GT:SU:PE:SR	./.:50:41:9	./.:0:0:0	./.:26:23:3	./.:119:81:38
unitig_2	5180231	5182085	-	DEL	DEL	-	1854	0	0	0	0	0			unitig_2	5180231	5182085		PM1118_GAP	PM448_GAP		unitig_2	5180227	DEL00001339	A	<DEL>	.	PASS	PRECISE;SVTYPE=DEL;SVMETHOD=EMBL.DELLYv0.7.7;CHR2=unitig_2;END=5182086;PE=16;MAPQ=60;CT=3to5;CIPOS=-4,4;CIEND=-4,4;INSLEN=0;HOMLEN=4;SR=10;SRQ=1;CONSENSUS=AGGTGATATAGGACTTCAGTCCTCTTTTCCGCTCATAATTTACTTGAATCTACTTTAAGCCCTGATTCGGGCGTGATGCACAAGTGTCTTTGTTCCAGTCAATAATCACGATTACGTCCACATAACCTAGATCTAACAGTGACAGCTTGTTTATGCTGCCGAATGGCTTGGAAACCTCTTATCACCAGATAAAGAAGCCAACTCTCTGTCGACTTCAGAA;CE=1.97546	GT:GL:GQ:FT:RCL:RC:RCR:CN:DR:DV:RR:RV	1/1:-76.9977,-6.31937,0:63:PASS:272:22:268:0:0:64:0:21	1/1:-40.7988,-3.31015,0:33:PASS:277:8:207:0:0:16:0:11	1/1:-21.4993,-1.80547,0:18:PASS:372:0:389:0:0:28:0:6	1/1:-242.394,-19.5609,0:10000:PASS:461:312:496:1:0:72:0:65	unitig_2	5180230	763	N	<DEL>	.	.	SVTYPE=DEL;STRANDS=+-:247;SVLEN=-1855;END=5182085;CIPOS=0,0;CIEND=0,0;CIPOS95=0,0;CIEND95=0,0;SU=247;PE=181;SR=66	GT:SU:PE:SR	./.:70:64:6	./.:24:16:8	./.:34:28:6	./.:119:73:46
unitig_2	5453128	5453298	-	-	-	DEL	170	0	0	0	0	0			unitig_2	5453128	5453298	-	-	-	PM449_GAP	unitig_2	5453125	DEL00001376	GAGTCAGAGTGTTTGTAATCAAGATAAGAGATGTTGATATCGAAAGTGTAAGCTGCCAGAAGAAGAAAATAAATGAATTTGTGTGAGAAGAGAATAAATATCGAGAAGGATGTTCGAATAAATGAAGGTCTCTCTAAAGATGAGAGACAAAGACGATGCTAAAAACACAAACCC	G	.	PASS	PRECISE;SVTYPE=DEL;SVMETHOD=EMBL.DELLYv0.7.7;CHR2=unitig_2;END=5453299;PE=0;MAPQ=60;CT=3to5;CIPOS=-4,4;CIEND=-4,4;INSLEN=0;HOMLEN=3;SR=10;SRQ=1;CONSENSUS=TAGACAGATTACGAGGCGGAAAGACTGCTTACATTGAAAGCTTCAAGAGAATTATCCTTAGAAGAGGACGCCATTGCGAGAGGCTCCTCTAGAAGGAGAAAAAAAGTTATTCTTAAAAGAAAGGATTGGAGAATGAGTTGAGGATCGCAGGAAAATGGACAT;CE=1.90493	GT:GL:GQ:FT:RCL:RC:RCR:CN:DR:DV:RR:RV	0/0:0,-6.61917,-80.6965:66:PASS:1704:5606:2450:3:0:0:22:0	0/0:0,-3.61104,-44.0987:36:PASS:1301:1988:1554:1:0:0:12:0	0/0:0,-1.20355,-14.0994:12:LowQual:574:897:471:2:0:0:4:0	1/1:-285.189,-23.469,0:10000:PASS:5540:132:6543:0:0:0:0:78	unitig_2	5453127	795	N	<DEL>	.	.	SVTYPE=DEL;STRANDS=+-:61;SVLEN=-171;END=5453298;CIPOS=0,0;CIEND=0,0;CIPOS95=0,0;CIEND95=0,0;SU=61;PE=0;SR=61	GT:SU:PE:SR	./.:0:0:0	./.:0:0:0	./.:0:0:0	./.:61:0:61
unitig_2	5454812	5454908	-	-	DEL	-	96	0	0	0	0	0			unitig_2	5454812	5454908	-	-	PM448_GAP	-	unitig_2	5454807	DEL00001377	CCTCTGTTCGGGACAGGCCATCTGCACGGGCTGTAGGCTGGTGGACAGGTTCTTGGCCAATCTCCTCTACCTCAGGTAGATGAATGGTGCCTTTTCCGTGGG	C	.	PASS	PRECISE;SVTYPE=DEL;SVMETHOD=EMBL.DELLYv0.7.7;CHR2=unitig_2;END=5454909;PE=0;MAPQ=60;CT=3to5;CIPOS=-5,5;CIEND=-5,5;INSLEN=0;HOMLEN=4;SR=10;SRQ=0.987179;CONSENSUS=ATCCGAATGTGGGTTCTGGTGACACCAGTCAGCAAATAATCTTAAGCGGAAGTCTTCGGTTAACAAGCTTAGACGTACCTCTACGCACCGAATTACCCAGGGACGTACAAGCTCTCCCTGACCTGGTCCCTGCTTCCGGCGTGTTGTACTGTGCCG;CE=1.99507	GT:GL:GQ:FT:RCL:RC:RCR:CN:DR:DV:RR:RV	0/0:0,-5.71654,-66.997:57:PASS:1954:2975:1114:2:0:0:19:0	0/0:0,-9.32754,-111.796:93:PASS:1185:3921:1955:2:0:0:31:0	1/1:-141.194,-12.0351,0:120:PASS:965:93:2461:0:0:0:0:40	0/0:0,-16.8506,-203.393:10000:PASS:3930:6890:4028:2:0:0:56:0	unitig_2	5454811	796	N	<DEL>	.	.	SVTYPE=DEL;STRANDS=+-:33;SVLEN=-97;END=5454908;CIPOS=-10,9;CIEND=-10,9;CIPOS95=0,0;CIEND95=0,0;SU=33;PE=0;SR=33	GT:SU:PE:SR	./.:0:0:0	./.:0:0:0	./.:33:0:33	./.:0:0:0
unitig_2	5642708	5642791	-	-	-	DEL	83	0	0	0	0	0			unitig_2	5642708	5642791	-	-	-	PM449_GAP	unitig_2	5642702	DEL00001392	CGGAGCCCACGACGTGCCTGACTTCGATTTCACAGAGAACTCGACCCCTTTATATGTGAGGGACCATCGTAAAGATTTGACCAAGGCTTT	C	.	PASS	PRECISE;SVTYPE=DEL;SVMETHOD=EMBL.DELLYv0.7.7;CHR2=unitig_2;END=5642792;PE=0;MAPQ=60;CT=3to5;CIPOS=-7,7;CIEND=-7,7;INSLEN=0;HOMLEN=6;SR=10;SRQ=0.987805;CONSENSUS=CAGTCTGTTGCAGGTACCTCGCAAAATTGGATGGAGCGCTCATCTGCCGGGAAAAGAAATGGACTTCTATGCTCGCAGCACGGAGCTCTTAGCCCGCAACTCCTTCGTGGAATCAAATAAGGATGGCCTTCGCCTTGCACTCGGGGCCCCACTAAGCTGAAAGG;CE=1.99322	GT:GL:GQ:FT:RCL:RC:RCR:CN:DR:DV:RR:RV	0/0:0,-7.52136,-88.3956:75:PASS:1163:3081:2022:2:0:0:25:0	0/0:0,-3.00902,-36.0987:30:PASS:726:1146:697:2:0:0:10:0	0/0:0,-6.62007,-79.9974:66:PASS:1721:2297:1398:1:0:0:22:0	1/1:-206.786,-17.747,0:10000:PASS:2021:225:2068:0:0:0:0:59	unitig_2	5642707	797	N	<DEL>	.	.	SVTYPE=DEL;STRANDS=+-:47;SVLEN=-84;END=5642791;CIPOS=0,0;CIEND=0,0;CIPOS95=0,0;CIEND95=0,0;SU=47;PE=0;SR=47	GT:SU:PE:SR	./.:0:0:0	./.:0:0:0	./.:0:0:0	./.:47:0:47
unitig_2	5663137	5664363	DEL	-	-	-	1226	0	1	0	1	0	TM1119_g4440		unitig_2	5663137	5664363	PA7_GAP	-	-	-	unitig_2	5663137	DEL00001393	C	<DEL>	.	PASS	IMPRECISE;SVTYPE=DEL;SVMETHOD=EMBL.DELLYv0.7.7;CHR2=unitig_2;END=5664364;PE=27;MAPQ=58;CT=3to5;CIPOS=-219,219;CIEND=-219,219	GT:GL:GQ:FT:RCL:RC:RCR:CN:DR:DV:RR:RV	1/1:-135.798,-8.12583,0:81:PASS:173:0:197:0:0:27:0:0	./.:0,0,0:0:LowQual:95:216:469:1:0:0:0:0	0/0:0,-1.80618,-36:18:PASS:59:236:542:1:6:0:0:0	./.:0,0,0:0:LowQual:355:0:0:0:0:0:0:0	unitig_2	5663135	800	N	<DEL>	.	.	SVTYPE=DEL;STRANDS=+-:27;SVLEN=-1228;END=5664363;CIPOS=-8,292;CIEND=-326,3;CIPOS95=0,207;CIEND95=-215,0;IMPRECISE;SU=27;PE=27;SR=0	GT:SU:PE:SR	./.:27:27:0	./.:0:0:0	./.:0:0:0	./.:0:0:0
unitig_3	257863	258056	-	-	-	DEL	193	0	0	0	0	0			unitig_3	257863	258056	-	-	-	PM449_GAP	unitig_3	257860	DEL00002252	CTACACCTCCGCCAGGGTAATAAACGTTATTTAGCGAGTTGAATATACCAGAAAAACCAGAGTTGAGAATACCTCATTAAGGCTTCGAAGATTCTGTTTATTTCTATAGCCCCGCTGGTCTTGACGAAAGTAGCAACTCCCTTGTCCGAAAAGTCGCGAATCCCACTCAGAATTAACAAATATCACCCCGGCAGAGG	C	.	PASS	PRECISE;SVTYPE=DEL;SVMETHOD=EMBL.DELLYv0.7.7;CHR2=unitig_3;END=258057;PE=0;MAPQ=60;CT=3to5;CIPOS=-4,4;CIEND=-4,4;INSLEN=0;HOMLEN=3;SR=10;SRQ=0.95679;CONSENSUS=GTTATCATCGGAATTCCGGTTGGGCCAACGGCCATGAGCACTAGCGCCATCCGGAATCTCCGATTTCGAGGATACTATAGATGTTATAGCTGCAACGTGTTGGTGCTATCGGTCTTGGCGAGACTTAATCAATTGAGAGTGAACTGCAGGCTTTTCTTGTTA;CE=1.98719	GT:GL:GQ:FT:RCL:RC:RCR:CN:DR:DV:RR:RV	0/0:0,-5.41565,-63.0971:54:PASS:2618:4889:2326:2:0:0:18:0	0/0:0,-1.41375,-47.4986:14:LowQual:2583:3392:1909:2:0:0:14:1	0/0:0,-7.52261,-90.1969:75:PASS:5967:4836:3701:1:0:0:25:0	1/1:-189.794,-15.9481,0:157:PASS:4892:95:6022:0:0:0:0:53	unitig_3	257862	1114	N	<DEL>	.	.	SVTYPE=DEL;STRANDS=+-:33;SVLEN=-194;END=258056;CIPOS=-10,6;CIEND=-10,9;CIPOS95=0,0;CIEND95=0,0;SU=33;PE=0;SR=33	GT:SU:PE:SR	./.:0:0:0	./.:1:0:1	./.:0:0:0	./.:32:0:32
unitig_3	264042	264879	-	-	-	DEL	837	1	0	0	1	0	TM1119_g8033		unitig_3	264042	264879	-	-	-	PM449_GAP	unitig_3	264039	DEL00002255	G	<DEL>	.	PASS	PRECISE;SVTYPE=DEL;SVMETHOD=EMBL.DELLYv0.7.7;CHR2=unitig_3;END=264880;PE=104;MAPQ=60;CT=3to5;CIPOS=-3,3;CIEND=-3,3;INSLEN=0;HOMLEN=2;SR=10;SRQ=0.994152;CONSENSUS=AATCCTTTTAATCTGCCGTATCTGCAATGCATGATGGATGATACAGCAGCGGCGGCTTGCTATATTAGACCCGACTTTCGCGGTTGAGAGTCGTTGTTCCAGACGAGCAGCATTTCTTCAAGAGAGAGGAGTCTCAAGCCATGATCGGTTGGGAAGATGACAAATGGCTCG;CE=1.99302	GT:GL:GQ:FT:RCL:RC:RCR:CN:DR:DV:RR:RV	0/0:0,-2.4065,-27.6983:24:PASS:110:207:117:2:64:0:8:0	0/0:0,-3.30952,-39.6982:33:PASS:55:111:70:2:29:0:11:0	0/0:0,-1.20134,-11.9972:12:LowQual:48:125:46:3:13:0:4:0	1/1:-215.19,-18.3529,0:10000:PASS:262:0:219:0:0:104:0:61	unitig_3	264041	1115	N	<DEL>	.	.	SVTYPE=DEL;STRANDS=+-:140;SVLEN=-838;END=264879;CIPOS=0,0;CIEND=0,0;CIPOS95=0,0;CIEND95=0,0;SU=140;PE=105;SR=35	GT:SU:PE:SR	./.:0:0:0	./.:0:0:0	./.:0:0:0	./.:140:105:35
unitig_3	306414	306593	DEL	DEL	DEL	DEL	179	0	0	0	0	0			unitig_3	306414	306593	PA7_GAP	PM1118_GAP	PM448_GAP	PM449_GAP	unitig_3	306411	DEL00002260	CTACAGTGGGTGGCAATAAGTTTCAATCCAAAGTGAAGTCACGTAAAGTCTTGGCAGCAACCACCCTAAGCTCAATGCAGTGTACCCCTAACCCTAACCCTCAAATTCTAGAGTGGTTGCTGCCAAGACTTTACGCGAAATTAGCTACTTCAGTTTGGATTGAAACTTATTGCCACCCACTG	C	.	PASS	PRECISE;SVTYPE=DEL;SVMETHOD=EMBL.DELLYv0.7.7;CHR2=unitig_3;END=306593;PE=0;MAPQ=60;CT=3to5;CIPOS=-4,4;CIEND=-4,4;INSLEN=0;HOMLEN=3;SR=10;SRQ=0.993902;CONSENSUS=ATTAGTCCCTGTCTAATGGCATGCTCCGTTACGCTCAGCAGGGTCTCAATACAAGCTCTTTTACTCACTACACTAGCTGCAACGTCGAATCGCCTATTGAGTTTCGCACATAGCGTACCCAGAAAAGCTTCCCTGTTTGTATGCCCAAGCCCGTTGAATTATTC;CE=1.97657	GT:GL:GQ:FT:RCL:RC:RCR:CN:DR:DV:RR:RV	1/1:-52.1974,-4.51282,0:45:PASS:1207:368:2170:0:0:0:0:15	1/1:-71.7974,-2.82001,0:28:PASS:1817:101:2160:0:0:0:1:21	1/1:-42.4984,-3.61073,0:36:PASS:1997:25:919:0:0:0:0:12	1/1:-259.391,-21.6647,0:10000:PASS:6302:134:6941:0:0:0:0:72	unitig_3	306413	1116	N	<DEL>	.	.	SVTYPE=DEL;STRANDS=+-:79;SVLEN=-179;END=306592;CIPOS=0,0;CIEND=0,0;CIPOS95=0,0;CIEND95=0,0;SU=79;PE=0;SR=79	GT:SU:PE:SR	./.:5:0:5	./.:13:0:13	./.:8:0:8	./.:53:0:53
unitig_3	391253	391848	-	-	DEL	DEL	595	0	0	0	0	0			unitig_3	391253	391848	-	-	PM448_GAP	PM449_GAP	unitig_3	391251	DEL00002264	C	<DEL>	.	PASS	PRECISE;SVTYPE=DEL;SVMETHOD=EMBL.DELLYv0.7.7;CHR2=unitig_3;END=391849;PE=38;MAPQ=60;CT=3to5;CIPOS=-3,3;CIEND=-3,3;INSLEN=0;HOMLEN=3;SR=10;SRQ=1;CONSENSUS=CGGTGTGATAGGTACGCCACCACGTGGCCAGCCCTACAAAAAGCGGAATGTGGCTCACAAAAGTGCATTATTCGTGAGCTCAATTACAAGTCGCCGAGTCCGGTTGACGCCAGCATGAAGAAACCTAGCTCAAGCTCAGACTACGGATTCGCATAATCGCGAACGT;CE=1.98486	GT:GL:GQ:FT:RCL:RC:RCR:CN:DR:DV:RR:RV	0/0:0,-5.11373,-60.6962:51:PASS:58:151:85:2:54:0:17:0	0/0:0,-8.12467,-97.9969:81:PASS:59:97:35:2:28:0:27:0	1/1:-171.394,-14.4429,0:144:PASS:72:0:76:0:0:39:0:48	1/1:-269.49,-22.5674,0:10000:PASS:190:0:184:0:0:128:0:75	unitig_3	391252	1118	N	<DEL>	.	.	SVTYPE=DEL;STRANDS=+-:253;SVLEN=-596;END=391848;CIPOS=0,0;CIEND=0,0;CIPOS95=0,0;CIEND95=0,0;SU=253;PE=171;SR=82	GT:SU:PE:SR	./.:0:0:0	./.:0:0:0	./.:78:45:33	./.:175:126:49
unitig_3	420037	420168	-	-	DEL	-	131	0	0	0	0	0			unitig_3	420037	420168	-	-	PM448_GAP	-	unitig_3	420034	DEL00002270	TGTCTGGCCTCTAGATAATGCATATAGAGATCCCAACTATAGCTTTCTACACGCCACTATGTAATATTGACACCTAAGAACTGTGCATGAACTATTGAGCTGTAAATTAACCGTATCATTGATCCATAGCCTCTG	T	.	PASS	PRECISE;SVTYPE=DEL;SVMETHOD=EMBL.DELLYv0.7.7;CHR2=unitig_3;END=420169;PE=0;MAPQ=60;CT=3to5;CIPOS=-5,5;CIEND=-5,5;INSLEN=0;HOMLEN=6;SR=10;SRQ=0.982143;CONSENSUS=GCCTAATTTCGGAGATCATATATATAGCATCCCGGGTTAGGGCACTGCTTTGCCAGCTACTGTAGGTGTGGTCATGGGTCTGTGTGAGCGGACATGGGATGGGCAGGTAGAGTATCGATTGCATCCAAGAGACGCTGACTAGAGCCTTTTTGCAGCGAACTCTTACCT;CE=1.98427	GT:GL:GQ:FT:RCL:RC:RCR:CN:DR:DV:RR:RV	0/0:0,-3.61005,-42.1977:36:PASS:1618:4016:2048:2:0:0:12:0	0/0:0,-3.61029,-43.6979:36:PASS:978:2287:778:3:0:0:12:0	1/1:-120.397,-9.63032,0:96:PASS:498:54:2676:0:0:0:0:32	0/0:0,-9.02692,-110.196:90:PASS:4873:10052:5344:2:0:0:30:0	unitig_3	420036	1119	N	<DEL>	.	.	SVTYPE=DEL;STRANDS=+-:26;SVLEN=-132;END=420168;CIPOS=-10,9;CIEND=-10,9;CIPOS95=0,0;CIEND95=0,0;SU=26;PE=0;SR=26	GT:SU:PE:SR	./.:0:0:0	./.:0:0:0	./.:26:0:26	./.:0:0:0
unitig_3	519264	519756	DEL	-	DEL	DEL	492	0	0	0	0	0			unitig_3	519264	519756	PA7_GAP	-	PM448_GAP	PM449_GAP	unitig_3	519259	DEL00002274	T	<DEL>	.	PASS	PRECISE;SVTYPE=DEL;SVMETHOD=EMBL.DELLYv0.7.7;CHR2=unitig_3;END=519757;PE=62;MAPQ=60;CT=3to5;CIPOS=-5,5;CIEND=-5,5;INSLEN=0;HOMLEN=5;SR=10;SRQ=0.983471;CONSENSUS=AGTCACGTATAAGCCGATAGGAGGGCCTGGGTTGTGGCCATATCGCGGTCCAATGATCACAGTAGCAGGCTCCGCACCCAGTACATCGTCGGCCAATACGTCACTATCAGTCTCGGAGTCG;CE=1.98787	GT:GL:GQ:FT:RCL:RC:RCR:CN:DR:DV:RR:RV	1/1:-52.9974,-4.5128,0:45:PASS:7129:59:5923:0:0:63:0:15	0/0:0,-9.02695,-108.296:90:PASS:5107:17795:5153:3:35:0:30:0	1/1:-92.4959,-7.8227,0:78:PASS:6733:268:5621:0:0:19:0:26	1/1:-208.292,-14.2542,0:143:PASS:19071:214:17013:0:0:93:1:59	unitig_3	519263	1120	N	<DEL>	.	.	SVTYPE=DEL;STRANDS=+-:247;SVLEN=-493;END=519756;CIPOS=0,0;CIEND=0,0;CIPOS95=0,0;CIEND95=0,0;SU=247;PE=165;SR=82	GT:SU:PE:SR	./.:69:62:7	./.:0:0:0	./.:40:19:21	./.:137:83:54
unitig_3	602396	602491	DEL	-	DEL	DEL	95	0	0	0	0	0			unitig_3	602396	602491	PA7_GAP	-	PM448_GAP	PM449_GAP	unitig_3	602395	DEL00002277	AAAGTCCAACCCATTGAGCAACCGTTATGCGTGGCCGCTCGAGTCGTTTCCATACCTCTTCCTCTTCTGGATTGGAGATGTTTACTTTTGTCAGCGT	A	.	PASS	PRECISE;SVTYPE=DEL;SVMETHOD=EMBL.DELLYv0.7.7;CHR2=unitig_3;END=602492;PE=0;MAPQ=60;CT=3to5;CIPOS=-2,2;CIEND=-2,2;INSLEN=0;HOMLEN=1;SR=10;SRQ=0.982906;CONSENSUS=AGTACAACCTCCTGAAGCACCCAAGCCCTTCGAAACCAGGCGCGATTGAGAAAGGTATACTGAGCCTCCTCGCGGTCACTGGCTGTGAACTAGCCATGTCTCGCAATATCTCCATTG;CE=1.98462	GT:GL:GQ:FT:RCL:RC:RCR:CN:DR:DV:RR:RV	1/1:-84.5931,-7.51886,0:75:PASS:759:21:1355:0:0:0:0:25	0/0:0,-9.6289,-114.396:96:PASS:1446:4120:2032:2:0:0:32:0	1/1:-186.493,-15.6461,0:157:PASS:1048:49:2589:0:0:0:0:52	1/1:-213.589,-18.051,0:10000:PASS:2801:35:2091:0:0:0:0:60	unitig_3	602395	1122	N	<DEL>	.	.	SVTYPE=DEL;STRANDS=+-:96;SVLEN=-96;END=602491;CIPOS=0,0;CIEND=0,0;CIPOS95=0,0;CIEND95=0,0;SU=96;PE=1;SR=95	GT:SU:PE:SR	./.:12:0:12	./.:0:0:0	./.:44:1:43	./.:40:0:40
unitig_3	627290	627453	DEL	-	-	-	163	0	0	0	0	0			unitig_3	627290	627453	PA7_GAP	-	-	-	unitig_3	627289	DEL00002280	CTTCTCCCTGATAGATGACAATACTATTATCATCAGCCGCGGCGGAAGCGACTGGATACTGGTTGTTGGCCATTGACCTTGGTGCTGGACTCCCAACTCCGCAAAAGTTACACCAGTCTGATAGCTGTCCCGGCATGGATCGGCGCACAATGTAGTGTCTGT	C	.	PASS	PRECISE;SVTYPE=DEL;SVMETHOD=EMBL.DELLYv0.7.7;CHR2=unitig_3;END=627451;PE=0;MAPQ=60;CT=3to5;CIPOS=-2,2;CIEND=-2,2;INSLEN=0;HOMLEN=1;SR=10;SRQ=0.976923;CONSENSUS=GCCTTCCTTTAGGTGTCATATAATTGTCGTCATCGGGAGTCTACAAGATGCACAAACCATTAACCTGAAGTCTAGGGTAGGGTAGCACAATTGGTCAATAAGGGAAATACACCGCCGCGTGAGGCAATAT;CE=1.98766	GT:GL:GQ:FT:RCL:RC:RCR:CN:DR:DV:RR:RV	1/1:-75.2969,-6.31853,0:63:PASS:1876:1:1803:0:0:0:0:21	0/0:0,-6.01816,-72.2976:60:PASS:2058:3760:1287:2:0:0:20:0	0/0:0,-6.31764,-72.796:63:PASS:1261:5316:2033:3:0:0:21:0	0/0:0,-21.3642,-257.391:10000:PASS:7135:14703:6773:2:0:0:71:0	unitig_3	627289	1124	N	<DEL>	.	.	SVTYPE=DEL;STRANDS=+-:7;SVLEN=-164;END=627453;CIPOS=-5,4;CIEND=-5,4;CIPOS95=0,0;CIEND95=0,0;SU=7;PE=0;SR=7	GT:SU:PE:SR	./.:7:0:7	./.:0:0:0	./.:0:0:0	./.:0:0:0
unitig_3	631178	631378	-	-	DEL	-	200	0	0	1	1	0	TM1119_g8168		unitig_3	631178	631378	-	-	PM448_GAP	-	unitig_3	631172	DEL00002281	TCGTCGACAGGGAATTTGTGAGCTGCTGGACGGGGGACCGGTCACGCGTGACAGCCGACTGGATTCAGCGCAAGCACAACGACCTTGCTGACGACGCGTGGCAGCTCGAGGTGGGACGGCTCTCGATGACACAGCAGGCCGACTTGATAGTCACGCGCCAGTGGCTGCGTACGCTGACATGGCAGATGGCCATCTCGAACTTCCTAA	T	.	PASS	PRECISE;SVTYPE=DEL;SVMETHOD=EMBL.DELLYv0.7.7;CHR2=unitig_3;END=631379;PE=0;MAPQ=60;CT=3to5;CIPOS=-7,7;CIEND=-7,7;INSLEN=0;HOMLEN=6;SR=10;SRQ=0.987578;CONSENSUS=GCCTCCCGGACGTGAACGCCGCTACTCCGCACGAGGTGGAGCAGGGCTGGAACTGTATAATTAAAAATTTCCTTGTCGTCGTCGAACAAGCCTTCATCTGAGGCGCTCTCTTTGGCCATGCCGGTACAGCTTTCAAGTGAGTTACGATGCTTTCTAGAGCA;CE=1.99557	GT:GL:GQ:FT:RCL:RC:RCR:CN:DR:DV:RR:RV	0/0:0,-5.11407,-59.3966:51:PASS:2525:4265:2058:2:0:0:17:0	0/0:0,-9.92889,-116.795:99:PASS:4977:7509:4061:2:0:0:33:0	1/1:-125.895,-10.5314,0:105:PASS:3686:120:3664:0:0:0:0:35	0/0:0,-17.1508,-204.092:10000:PASS:6711:13374:7632:2:0:0:57:0	unitig_3	631177	1125	N	<DEL>	.	.	SVTYPE=DEL;STRANDS=+-:28;SVLEN=-201;END=631378;CIPOS=-2,0;CIEND=-1,0;CIPOS95=0,0;CIEND95=0,0;SU=28;PE=1;SR=27	GT:SU:PE:SR	./.:0:0:0	./.:0:0:0	./.:28:1:27	./.:0:0:0
unitig_3	670747	671508	-	DEL	-	-	761	1	0	0	1	0	TM1119_g8179		unitig_3	670747	671508	-	PM1118_GAP	-	-	unitig_3	670744	DEL00002284	A	<DEL>	.	PASS	PRECISE;SVTYPE=DEL;SVMETHOD=EMBL.DELLYv0.7.7;CHR2=unitig_3;END=671509;PE=18;MAPQ=60;CT=3to5;CIPOS=-4,4;CIEND=-4,4;INSLEN=0;HOMLEN=3;SR=10;SRQ=0.994872;CONSENSUS=TCTTATACGGAGATGTTACCTTAGCAGTTGGGTGATTGGATCAGGCCAATCACACCTCCCTTACCTAACTCAAGCGAGCTGATTTGATCCCGGCAATAGATTGTGTCTATAATAGTCGAGATCCTGATGAGAACCAGTGGGAAGTTGCACTAACTGGACTACTTCATGCCTTCGTCCTCACACCATTGGCTACCA;CE=1.99423	GT:GL:GQ:FT:RCL:RC:RCR:CN:DR:DV:RR:RV	./.:0,0,0:0:LowQual:6:0:100:0:0:0:0:0	1/1:-42.2979,-3.61029,0:36:PASS:52:3:42:0:0:18:0:12	0/0:0,-3.61017,-40.7978:36:PASS:18:102:49:3:14:0:12:0	0/0:0,-12.6387,-153.895:126:PASS:92:420:240:3:71:0:42:0	unitig_3	670746	1126	N	<DEL>	.	.	SVTYPE=DEL;STRANDS=+-:27;SVLEN=-762;END=671508;CIPOS=-10,9;CIEND=-10,9;CIPOS95=0,0;CIEND95=0,0;SU=27;PE=18;SR=9	GT:SU:PE:SR	./.:0:0:0	./.:27:18:9	./.:0:0:0	./.:0:0:0
unitig_3	734713	739222	-	DEL	-	-	4509	1	0	0	1	0	TM1119_g8202		unitig_3	734713	739222	-	PM1118_GAP	-	-	unitig_3	734738	DEL00002287	C	<DEL>	.	PASS	IMPRECISE;SVTYPE=DEL;SVMETHOD=EMBL.DELLYv0.7.7;CHR2=unitig_3;END=739223;PE=19;MAPQ=56;CT=3to5;CIPOS=-134,134;CIEND=-134,134	GT:GL:GQ:FT:RCL:RC:RCR:CN:DR:DV:RR:RV	0/0:0,-17.1577,-332.899:10000:PASS:572:1153:505:2:57:0:0:0	1/1:-98.9998,-2.42033,0:24:PASS:269:18:511:0:1:19:0:0	0/0:0,-8.12548,-148.598:81:PASS:352:699:550:2:27:0:0:0	0/0:0,-32.5064,-626.595:10000:PASS:1364:2451:1066:2:108:0:0:0	unitig_3	734737	1128	N	<DEL>	.	.	SVTYPE=DEL;STRANDS=+-:22;SVLEN=-4485;END=739222;CIPOS=-10,9;CIEND=-10,9;CIPOS95=-1,1;CIEND95=-1,0;IMPRECISE;SU=22;PE=20;SR=2	GT:SU:PE:SR	./.:0:0:0	./.:22:20:2	./.:0:0:0	./.:0:0:0
unitig_3	747862	748057	DEL	DEL	-	-	195	0	0	0	0	0			unitig_3	747862	748057	PA7_GAP	PM1118_GAP	-	-	unitig_3	747860	DEL00002289	CTCAACGAGCTTCTCTCGAAGAGAATCCACCATCCATGGGATATGTCCAAAGTCAATCTCAACCTGGTTGGCTCCCCACTTGTCTACGCACAATCTCTAAAATTCTTCGGAAACATCTTGTATTTGAGGGTTACGACGACTATTATGGGAATGTCCAGGTCTGCGGGTGTACAAATAATCGTAGTAGTGAACGGAAGACAGCTA	C	.	PASS	PRECISE;SVTYPE=DEL;SVMETHOD=EMBL.DELLYv0.7.7;CHR2=unitig_3;END=748064;PE=0;MAPQ=60;CT=3to5;CIPOS=-6,6;CIEND=-6,6;INSLEN=0;HOMLEN=6;SR=10;SRQ=1;CONSENSUS=ATTGGCCATCCCGCGGCTTCTCTACTGTACCTTTGCGGCTTCTTCCACTATCAGCTCTGTTCACACCAGTAGGCTGCCGCTTCGTTTTTCACTGACTCCTCGACACCATCATAC;CE=1.90705	GT:GL:GQ:FT:RCL:RC:RCR:CN:DR:DV:RR:RV	1/1:-52.8976,-4.51301,0:45:PASS:2534:68:2086:0:0:0:0:15	1/1:-96.2934,-5.32419,0:53:PASS:3295:223:2971:0:0:0:1:29	0/0:0,-9.62778,-111.895:96:PASS:4337:6549:5503:1:0:0:32:0	0/0:0,-6.92068,-81.997:69:PASS:6790:13954:6019:2:0:0:23:0	unitig_3	747861	1129	N	<DEL>	.	.	SVTYPE=DEL;STRANDS=+-:34;SVLEN=-196;END=748057;CIPOS=-1,0;CIEND=-1,0;CIPOS95=0,0;CIEND95=0,0;SU=34;PE=0;SR=34	GT:SU:PE:SR	./.:10:0:10	./.:24:0:24	./.:0:0:0	./.:0:0:0
unitig_3	814927	815018	-	-	-	DEL	91	0	0	1	1	0	TM1119_g8234		unitig_3	814927	815018	-	-	-	PM449_GAP	unitig_3	814925	DEL00002297	AAGAAGGAAAAGAAAGCAACGGAGCAGAAAGCTTCGAGCAAGCTCTCTCCAGAACCAGAGACACCCCCGACGGAGCCCGTTTCGAATCCAAGCG	A	.	PASS	PRECISE;SVTYPE=DEL;SVMETHOD=EMBL.DELLYv0.7.7;CHR2=unitig_3;END=815019;PE=0;MAPQ=60;CT=3to5;CIPOS=-6,6;CIEND=-6,6;INSLEN=0;HOMLEN=8;SR=10;SRQ=0.987654;CONSENSUS=TGAAAAGAAGAGCAAGAAGTCGAAGAAGCTTTCTATGAGCAGCCCGGAGCCAGCCAACTTGGGCGCAAAACCAAAGACAAGCAACGATGATCAAGAGCCTCCCAAGGCGAAGACCAAGACGAAGAAGAAGCGTTCGAGTGATGCGACCGTTGAGATCCCAGG;CE=1.89978	GT:GL:GQ:FT:RCL:RC:RCR:CN:DR:DV:RR:RV	0/0:0,-3.91166,-46.7983:39:PASS:882:1948:831:2:0:0:13:0	0/0:0,-11.1329,-131.795:111:PASS:2550:4897:1330:3:0:0:37:0	0/0:0,-16.5489,-195.692:10000:PASS:3880:7279:2567:2:0:0:55:0	1/1:-168.593,-14.1418,0:141:PASS:2815:200:1550:0:0:0:0:47	unitig_3	814926	1130	N	<DEL>	.	.	SVTYPE=DEL;STRANDS=+-:41;SVLEN=-86;END=815012;CIPOS=0,0;CIEND=0,0;CIPOS95=0,0;CIEND95=0,0;SU=41;PE=1;SR=40	GT:SU:PE:SR	./.:0:0:0	./.:0:0:0	./.:0:0:0	./.:41:1:40
unitig_3	1035104	1035462	DEL	-	-	-	358	0	1	0	1	0	TM1119_g8315		unitig_3	1035104	1035462	PA7_GAP	-	-	-	unitig_3	1035102	DEL00002310	C	<DEL>	.	PASS	PRECISE;SVTYPE=DEL;SVMETHOD=EMBL.DELLYv0.7.7;CHR2=unitig_3;END=1035463;PE=50;MAPQ=60;CT=3to5;CIPOS=-2,2;CIEND=-2,2;INSLEN=0;HOMLEN=1;SR=10;SRQ=0.976562;CONSENSUS=ATTCTGATGCAATCGATATGCGGAACAGATCCTCGAGTGCGTAGAAGGCGTCGGATGCCAGAATCGGCAGACAACAGAGTCACCAGGTATGATCTCCTGCTCGTTCACCAGATTGTGGAGATATCTGC;CE=1.99542	GT:GL:GQ:FT:RCL:RC:RCR:CN:DR:DV:RR:RV	1/1:-57.8977,-4.81415,0:48:PASS:5377:21:2700:0:0:50:0:16	0/0:0,-2.70821,-32.7989:27:PASS:4260:7416:4032:2:25:0:9:0	0/0:0,-9.32831,-113.896:93:PASS:6404:9780:7119:1:37:0:31:0	0/0:0,-19.2563,-232.79:10000:PASS:13861:27426:13361:2:95:0:64:0	unitig_3	1035103	1134	N	<DEL>	.	.	SVTYPE=DEL;STRANDS=+-:9;SVLEN=-359;END=1035462;CIPOS=-10,9;CIEND=-5,4;CIPOS95=0,0;CIEND95=0,0;SU=9;PE=2;SR=7	GT:SU:PE:SR	./.:9:2:7	./.:0:0:0	./.:0:0:0	./.:0:0:0
unitig_3	1210304	1211963	DEL	-	-	-	1659	0	0	0	0	0			unitig_3	1210304	1211963	PA7_GAP	-	-	-	unitig_3	1210302	DEL00002328	G	<DEL>	.	PASS	PRECISE;SVTYPE=DEL;SVMETHOD=EMBL.DELLYv0.7.7;CHR2=unitig_3;END=1211964;PE=54;MAPQ=60;CT=3to5;CIPOS=-2,2;CIEND=-2,2;INSLEN=0;HOMLEN=2;SR=10;SRQ=0.991071;CONSENSUS=GCCTCGTCGCGCCTATCATGGATAAAGAGTCTCACATTTCAAGCCTCCGGTTGTAAGGAAGCGCCGAGAAAGACGAAGCCAAATGCAATCTATCGTGGGATAGTCGAACTCC;CE=1.99013	GT:GL:GQ:FT:RCL:RC:RCR:CN:DR:DV:RR:RV	1/1:-49.1976,-4.21198,0:42:PASS:219:0:207:0:0:54:0:14	0/0:0,-3.61073,-42.7984:36:PASS:135:256:95:2:20:0:12:0	0/0:0,-7.82281,-92.896:78:PASS:245:269:85:2:18:0:26:0	0/0:0,-17.1508,-207.092:10000:PASS:458:929:425:2:98:0:57:0	unitig_3	1210303	1141	N	<DEL>	.	.	SVTYPE=DEL;STRANDS=+-:61;SVLEN=-1660;END=1211963;CIPOS=-3,3;CIEND=-5,3;CIPOS95=0,0;CIEND95=0,0;SU=61;PE=54;SR=7	GT:SU:PE:SR	./.:61:54:7	./.:0:0:0	./.:0:0:0	./.:0:0:0
unitig_3	1357400	1357594	-	-	DEL	-	194	0	0	0	0	0			unitig_3	1357400	1357594	-	-	PM448_GAP	-	unitig_3	1357398	DEL00002338	TTACTCCTCCGCCAGGGTAATAAATGTTAGTTTAGCAAGGATGTTACTACCTCCTCAACAAGGGTTTACTACCTATATAGAAGTTGATAGACCTATAATAATAAACAGAATATTCGAGAGCTTGATGAGTATTGTAACTCTTGACATTGAGTATCCTCACCCTTCAACAATTAACGTTTATTACCCTGGCGGAGGAG	T	.	PASS	PRECISE;SVTYPE=DEL;SVMETHOD=EMBL.DELLYv0.7.7;CHR2=unitig_3;END=1357595;PE=0;MAPQ=60;CT=3to5;CIPOS=-5,5;CIEND=-5,5;INSLEN=0;HOMLEN=5;SR=10;SRQ=0.969325;CONSENSUS=AAGTCAATCCAAGCGTCACCCAGCACTGCTAACAGCTGCTTAACAGGGCCAAGGTATATTACGCAGTAATTACTAACGTTCCCTTGATTCTTCTCCACCGTGCCCCAAACCTCGCTCGCGTGCACGCACACATGGCGTGTTCGACTTGCAAGTTAGCGCCG;CE=1.97832	GT:GL:GQ:FT:RCL:RC:RCR:CN:DR:DV:RR:RV	./.:0,0,0:0:LowQual:1078:1515:1567:1:0:0:0:0	./.:0,0,0:0:LowQual:2598:0:5900:0:0:0:0:0	1/1:-266.591,-21.9665,0:10000:PASS:2567:741:8270:0:0:0:0:73	./.:0,0,0:0:LowQual:3622:669:3876:0:0:0:0:0	unitig_3	1357394	1146	N	<DEL>	.	.	SVTYPE=DEL;STRANDS=+-:44;SVLEN=-205;END=1357599;CIPOS=-2,0;CIEND=0,4;CIPOS95=-2,0;CIEND95=0,0;IMPRECISE;SU=44;PE=0;SR=44	GT:SU:PE:SR	./.:0:0:0	./.:3:0:3	./.:38:0:38	./.:3:0:3
unitig_3	1405550	1406579	DEL	-	DEL	DEL	1029	0	0	0	0	0			unitig_3	1405550	1406579	PA7_GAP	-	PM448_GAP	PM449_GAP	unitig_3	1405550	DEL00002344	G	<DEL>	.	PASS	IMPRECISE;SVTYPE=DEL;SVMETHOD=EMBL.DELLYv0.7.7;CHR2=unitig_3;END=1406580;PE=90;MAPQ=60;CT=3to5;CIPOS=-50,50;CIEND=-50,50	GT:GL:GQ:FT:RCL:RC:RCR:CN:DR:DV:RR:RV	1/1:-294.399,-16.2547,0:10000:PASS:126:0:140:0:0:54:0:0	0/0:0,-4.81647,-96:48:PASS:66:116:57:2:16:0:0:0	1/1:-90,-4.51544,0:45:PASS:120:0:44:0:0:15:0:0	1/1:-534,-27.0926,0:10000:PASS:301:0:253:0:0:90:0:0	unitig_3	1405549	1152	N	<DEL>	.	.	SVTYPE=DEL;STRANDS=+-:213;SVLEN=-1030;END=1406579;CIPOS=0,0;CIEND=0,0;CIPOS95=0,0;CIEND95=0,0;SU=213;PE=159;SR=54	GT:SU:PE:SR	./.:67:54:13	./.:0:0:0	./.:24:15:9	./.:122:90:32
unitig_3	1570214	1570903	-	-	DEL	-	689	1	0	0	1	0	TM1119_g8466		unitig_3	1570214	1570903	-	-	PM448_GAP	-	unitig_3	1570206	DEL00002357	G	<DEL>	.	PASS	PRECISE;SVTYPE=DEL;SVMETHOD=EMBL.DELLYv0.7.7;CHR2=unitig_3;END=1570904;PE=26;MAPQ=60;CT=3to5;CIPOS=-7,7;CIEND=-7,7;INSLEN=0;HOMLEN=8;SR=10;SRQ=0.974468;CONSENSUS=CCCACGAACACGGCCAGCATGTTGTTGCCATCGGTCAAGAAACAGACCATAGTAAGACCGAAACCGCGACAAGATTCGCCGTCGAAATAAGCGACTCAGCAGGGCTCAGGTCCAGCATCCTTCTCCCTGGTCGAGCTTCAAAGGAAAGAATAGATAACCAAACAGGCAATGATGCAGAAGACACATCCAGAAGTGAAGACCCTAGTCCGAAAGACATCCCGCTCTTTACACCAA;CE…	GT:GL:GQ:FT:RCL:RC:RCR:CN:DR:DV:RR:RV	0/0:0,-3.91041,-45.697:39:PASS:74:164:18:4:9:0:13:0	0/0:0,-2.4067,-27.1985:24:PASS:48:77:36:2:17:0:8:0	1/1:-33.0992,-0.310066,0:5:LowQual:48:1:50:0:0:26:1:10	0/0:0,-13.5417,-166.295:135:PASS:166:392:166:2:92:0:45:0	unitig_3	1570213	1155	N	<DEL>	.	.	SVTYPE=DEL;STRANDS=+-:33;SVLEN=-690;END=1570903;CIPOS=-3,3;CIEND=-5,2;CIPOS95=0,0;CIEND95=0,0;SU=33;PE=26;SR=7	GT:SU:PE:SR	./.:0:0:0	./.:0:0:0	./.:33:26:7	./.:0:0:0
unitig_3	1570935	1571191	DEL	-	-	-	256	0	0	1	1	0	TM1119_g8466		unitig_3	1570935	1571191	PA7_GAP	-	-	-	unitig_3	1570927	DEL00002358	CAAAGGAAAGAATAGATAACCAAGCAGGCAATGATGCAGAAGACACATCCAGAAGTGAAATCCCTAGTCCGAAAGACATCCCGCTCTTTACACCAAACGAGTCCATTCCTCTCTTAACATCCAGCTCCAGCTCCGTTGACTTTATGATTAGTGATGCGGACACAAGAGGAGATTTTTGGGGGCTGTATTCCAAGACCATAGAGACTGGTCAATCATCCGAGGTGTACACGACGAATGCGAAAACCCGCTATGCCTTTAGCAGCGT	C	.	PASS	PRECISE;SVTYPE=DEL;SVMETHOD=EMBL.DELLYv0.7.7;CHR2=unitig_3;END=1571192;PE=0;MAPQ=60;CT=3to5;CIPOS=-8,8;CIEND=-8,8;INSLEN=0;HOMLEN=8;SR=10;SRQ=0.982759;CONSENSUS=TATGATGAACGCCAAGCTGAGATATATGAGGAGCACATCCTTCTCCCTGGTCGAGCTTCAAAGGAACCATCGGCTGACGATCTGACCCTTAAGGTAGGTATTGCTCCGAGTCTGCC;CE=1.99957	GT:GL:GQ:FT:RCL:RC:RCR:CN:DR:DV:RR:RV	1/1:-60.8942,-5.41271,0:54:PASS:1990:108:2464:0:0:0:0:18	0/0:0,-1.80535,-21.2992:18:PASS:1675:3824:2337:2:0:0:6:0	0/0:0,-3.3101,-40.0988:33:PASS:351:6150:2191:5:0:0:11:0	0/0:0,-17.7536,-212.893:10000:PASS:9722:18382:9685:2:0:0:59:0	unitig_3	1570934	1154	N	<DEL>	.	.	SVTYPE=DEL;STRANDS=+-:9;SVLEN=-257;END=1571191;CIPOS=-4,3;CIEND=-10,8;CIPOS95=0,0;CIEND95=0,0;SU=9;PE=0;SR=9	GT:SU:PE:SR	./.:9:0:9	./.:0:0:0	./.:0:0:0	./.:0:0:0
unitig_3	1792341	1792705	-	-	-	DEL	364	0	0	0	0	0			unitig_3	1792341	1792705	-	-	-	PM449_GAP	unitig_3	1792343	DEL00002372	T	<DEL>	.	PASS	PRECISE;SVTYPE=DEL;SVMETHOD=EMBL.DELLYv0.7.7;CHR2=unitig_3;END=1792706;PE=53;MAPQ=60;CT=3to5;CIPOS=-2,2;CIEND=-2,2;INSLEN=0;HOMLEN=2;SR=10;SRQ=0.993671;CONSENSUS=ATCACGCAGGTATTCAGCGGGCCCGTAGTATTTCTTCAATCAGGCCGTATCAATGACCTTATCTACCAGAGGCGAAGATGGGATACTAGCTATCAAGTCCCTTGCAGGCTCAACGGTGGCAAGCACACGTGTAGTACGATAAGCTTGTATTGCAACG;CE=1.99876	GT:GL:GQ:FT:RCL:RC:RCR:CN:DR:DV:RR:RV	0/0:0,-4.81451,-59.398:48:PASS:2865:7690:4090:2:40:0:16:0	0/0:0,-4.21283,-51.1984:42:PASS:3548:7347:4913:2:24:0:14:0	0/0:0,-4.81451,-57.398:48:PASS:3124:7855:5892:2:20:0:16:0	1/1:-220.694,-18.0555,0:10000:PASS:9153:194:10491:0:0:53:0:60	unitig_3	1792340	1157	N	<DEL>	.	.	SVTYPE=DEL;STRANDS=+-:50;SVLEN=-365;END=1792705;CIPOS=0,0;CIEND=0,0;CIPOS95=0,0;CIEND95=0,0;SU=50;PE=9;SR=41	GT:SU:PE:SR	./.:0:0:0	./.:0:0:0	./.:0:0:0	./.:50:9:41
unitig_3	1916312	1920005	DEL	DEL	-	-	3693	0	0	0	0	1		TM1119_g8566	unitig_3	1916312	1920005	PA7_GAP	PM1118_GAP	-	-	unitig_3	1916308	DEL00002382	A	<DEL>	.	PASS	IMPRECISE;SVTYPE=DEL;SVMETHOD=EMBL.DELLYv0.7.7;CHR2=unitig_3;END=1920006;PE=45;MAPQ=60;CT=3to5;CIPOS=-50,50;CIEND=-50,50	GT:GL:GQ:FT:RCL:RC:RCR:CN:DR:DV:RR:RV	1/1:-258,-13.5463,0:135:PASS:396:0:448:0:0:45:0:0	1/1:-119.8,-6.02059,0:60:PASS:207:4:496:0:0:20:0:0	0/0:0,-3.00811,-56.2978:30:PASS:150:534:550:2:10:0:0:0	0/0:0,-31.9048,-630.896:10000:PASS:1141:2208:905:2:106:0:0:0	unitig_3	1916307	1158	N	<DEL>	.	.	SVTYPE=DEL;STRANDS=+-:78;SVLEN=-3698;END=1920005;CIPOS=-7,9;CIEND=-10,9;CIPOS95=0,0;CIEND95=0,0;SU=78;PE=66;SR=12	GT:SU:PE:SR	./.:50:46:4	./.:28:20:8	./.:0:0:0	./.:0:0:0
unitig_3	1921741	1922588	-	-	DEL	-	847	0	0	0	0	0			unitig_3	1921741	1922588	-		PM448_GAP	-	unitig_3	1921738	DEL00002384	A	<DEL>	.	PASS	PRECISE;SVTYPE=DEL;SVMETHOD=EMBL.DELLYv0.7.7;CHR2=unitig_3;END=1922589;PE=80;MAPQ=60;CT=3to5;CIPOS=-4,4;CIEND=-4,4;INSLEN=0;HOMLEN=3;SR=10;SRQ=1;CONSENSUS=AATCTGTGGCCAACCTGGCGGCGAACGTGGTGGCTTTCTGGTTCAAGGACGGACATGACGGTATTCCCAGCACCTGCACACAGACGGAGCACCTTGTCGGACCAACCAGAGCACACCGTGGCTGGGGACGGCAGGGCACAACGAACCACCACGAGGGG;CE=1.9374	GT:GL:GQ:FT:RCL:RC:RCR:CN:DR:DV:RR:RV	./.:0,0,0:0:LowQual:111:86:103:1:0:47:0:0	1/1:-289.189,-24.3725,0:10000:PASS:206:86:202:0:0:80:0:81	1/1:-337.387,-28.2843,0:10000:PASS:271:2:340:0:0:111:0:94	1/1:-3.39983,-0.300857,0:5:LowQual:200:0:225:0:0:88:0:1	unitig_3	1921740	1159	N	<DEL>	.	.	SVTYPE=DEL;STRANDS=+-:265;SVLEN=-848;END=1922588;CIPOS=0,0;CIEND=0,0;CIPOS95=0,0;CIEND95=0,0;SU=265;PE=101;SR=164	GT:SU:PE:SR	./.:42:38:4	./.:64:6:58	./.:109:43:66	./.:50:14:36
unitig_3	1921745	1922586	-	-	-	DEL	841	0	0	0	0	0			unitig_3	1921745	1922586	-	-	-	PM449_GAP	unitig_3	1921738	DEL00002384	A	<DEL>	.	PASS	PRECISE;SVTYPE=DEL;SVMETHOD=EMBL.DELLYv0.7.7;CHR2=unitig_3;END=1922589;PE=80;MAPQ=60;CT=3to5;CIPOS=-4,4;CIEND=-4,4;INSLEN=0;HOMLEN=3;SR=10;SRQ=1;CONSENSUS=AATCTGTGGCCAACCTGGCGGCGAACGTGGTGGCTTTCTGGTTCAAGGACGGACATGACGGTATTCCCAGCACCTGCACACAGACGGAGCACCTTGTCGGACCAACCAGAGCACACCGTGGCTGGGGACGGCAGGGCACAACGAACCACCACGAGGGG;CE=1.9374	GT:GL:GQ:FT:RCL:RC:RCR:CN:DR:DV:RR:RV	./.:0,0,0:0:LowQual:111:86:103:1:0:47:0:0	1/1:-289.189,-24.3725,0:10000:PASS:206:86:202:0:0:80:0:81	1/1:-337.387,-28.2843,0:10000:PASS:271:2:340:0:0:111:0:94	1/1:-3.39983,-0.300857,0:5:LowQual:200:0:225:0:0:88:0:1	unitig_3	1921740	1159	N	<DEL>	.	.	SVTYPE=DEL;STRANDS=+-:265;SVLEN=-848;END=1922588;CIPOS=0,0;CIEND=0,0;CIPOS95=0,0;CIEND95=0,0;SU=265;PE=101;SR=164	GT:SU:PE:SR	./.:42:38:4	./.:64:6:58	./.:109:43:66	./.:50:14:36
unitig_3	1985477	1996479	-	-	DEL	DEL	11002	0	0	0	0	2		TM1119_g8590;TM1119_g8591	unitig_3	1985477	1996479	-	-	PM448_GAP	PM449_GAP	unitig_3	1985468	DEL00002388	A	<DEL>	.	PASS	PRECISE;SVTYPE=DEL;SVMETHOD=EMBL.DELLYv0.7.7;CHR2=unitig_3;END=1996480;PE=56;MAPQ=60;CT=3to5;CIPOS=-10,10;CIEND=-10,10;INSLEN=0;HOMLEN=9;SR=10;SRQ=0.981013;CONSENSUS=AATAGAACTGACCCAGTGAATCGCTCAGACGATCTCAGGGACAGCGATACCCAAAATTACAGACGAATTTGGCGGCTTTTACGATGTGTCATGGTATGGCGCAGCCTACTTCATGACATTCGGCGGGCTCGAAGCCGCCTGGGGCAAAGCATTCAAGT;CE=1.99422	GT:GL:GQ:FT:RCL:RC:RCR:CN:DR:DV:RR:RV	1/1:-36.899,-3.00935,0:30:PASS:1152:6:1173:0:0:42:0:10	0/0:0,-4.81421,-56.6977:48:PASS:821:1812:1317:2:23:0:16:0	1/1:-91.9971,-7.52287,0:75:PASS:920:4:1876:0:0:56:0:25	1/1:-308.388,-25.8768,0:10000:PASS:2991:44:3048:0:0:90:0:86	unitig_3	1985476	1161	N	<DEL>	.	.	SVTYPE=DEL;STRANDS=+-:276;SVLEN=-11003;END=1996479;CIPOS=0,0;CIEND=0,0;CIPOS95=0,0;CIEND95=0,0;SU=276;PE=191;SR=85	GT:SU:PE:SR	./.:51:42:9	./.:0:0:0	./.:74:57:17	./.:151:92:59
unitig_3	1985477	1996486	DEL	-	-	-	11009	0	0	0	0	2		TM1119_g8590;TM1119_g8591	unitig_3	1985477	1996486	PA7_GAP	-	-	-	unitig_3	1985468	DEL00002388	A	<DEL>	.	PASS	PRECISE;SVTYPE=DEL;SVMETHOD=EMBL.DELLYv0.7.7;CHR2=unitig_3;END=1996480;PE=56;MAPQ=60;CT=3to5;CIPOS=-10,10;CIEND=-10,10;INSLEN=0;HOMLEN=9;SR=10;SRQ=0.981013;CONSENSUS=AATAGAACTGACCCAGTGAATCGCTCAGACGATCTCAGGGACAGCGATACCCAAAATTACAGACGAATTTGGCGGCTTTTACGATGTGTCATGGTATGGCGCAGCCTACTTCATGACATTCGGCGGGCTCGAAGCCGCCTGGGGCAAAGCATTCAAGT;CE=1.99422	GT:GL:GQ:FT:RCL:RC:RCR:CN:DR:DV:RR:RV	1/1:-36.899,-3.00935,0:30:PASS:1152:6:1173:0:0:42:0:10	0/0:0,-4.81421,-56.6977:48:PASS:821:1812:1317:2:23:0:16:0	1/1:-91.9971,-7.52287,0:75:PASS:920:4:1876:0:0:56:0:25	1/1:-308.388,-25.8768,0:10000:PASS:2991:44:3048:0:0:90:0:86	unitig_3	1985476	1161	N	<DEL>	.	.	SVTYPE=DEL;STRANDS=+-:276;SVLEN=-11003;END=1996479;CIPOS=0,0;CIEND=0,0;CIPOS95=0,0;CIEND95=0,0;SU=276;PE=191;SR=85	GT:SU:PE:SR	./.:51:42:9	./.:0:0:0	./.:74:57:17	./.:151:92:59
unitig_3	2023304	2023509	DEL	-	-	-	205	0	0	0	0	0			unitig_3	2023304	2023509	PA7_GAP	-	-	-	unitig_3	2023302	DEL00002390	ATACACCTCCGCCGGGGTATTTAATGTTAATTAGGCGAGGGATCACGACTCTTCAAACAAGGGGATTGCTACTTTTGTCAAGGCCAGTGGAACTATAGAAATAAACAGAAGCTTCGAAGCCCCAATCAGGTAATTTTTCAGTATCTTCATGTTTTTTCAGTATATTCACCCTTGACGAACTAACAATAAATACCCCGGCGGAGT	A	.	PASS	PRECISE;SVTYPE=DEL;SVMETHOD=EMBL.DELLYv0.7.7;CHR2=unitig_3;END=2023506;PE=0;MAPQ=60;CT=3to5;CIPOS=-2,2;CIEND=-2,2;INSLEN=0;HOMLEN=1;SR=10;SRQ=0.957265;CONSENSUS=TGCTTCGTCCTCTAGAACACCTCTGAGGCGGTCTTTAGACCAAAGGGCATGGGGTTGAACCAATGGATTCTCCCGTCGCTCCGGAAAGCAGTGAGATGGCGATGTGTCCCTTCTT;CE=1.98936	GT:GL:GQ:FT:RCL:RC:RCR:CN:DR:DV:RR:RV	1/1:-50.2955,-4.51092,0:45:PASS:1838:12:1834:0:0:0:0:15	0/0:0,-6.91942,-81.6957:69:PASS:3468:4098:4592:1:0:0:23:0	0/0:0,-13.8409,-164.493:138:PASS:5648:8095:7553:1:0:0:46:0	0/0:0,-19.5554,-227.088:10000:PASS:8934:17688:7528:2:0:0:65:0	unitig_3	2023303	1163	N	<DEL>	.	.	SVTYPE=DEL;STRANDS=+-:7;SVLEN=-206;END=2023509;CIPOS=-5,4;CIEND=-5,4;CIPOS95=0,0;CIEND95=0,0;SU=7;PE=0;SR=7	GT:SU:PE:SR	./.:7:0:7	./.:0:0:0	./.:0:0:0	./.:0:0:0
unitig_3	2150220	2150564	-	-	DEL	-	344	0	1	0	1	0	TM1119_g8642		unitig_3	2150220	2150564	-	-	PM448_GAP	-	unitig_3	2150217	DEL00002404	G	<DEL>	.	PASS	PRECISE;SVTYPE=DEL;SVMETHOD=EMBL.DELLYv0.7.7;CHR2=unitig_3;END=2150565;PE=13;MAPQ=60;CT=3to5;CIPOS=-4,4;CIEND=-4,4;INSLEN=0;HOMLEN=5;SR=10;SRQ=0.960452;CONSENSUS=AGTTGCTGGAATCCGCGCACTGTATTATCCTCCGTAGGAGCCCGATGATAACGAGACCACTGGACTGGGTGCTCACACAGACGTGCAATGTGCGAAAATGGGGGAGTTGACTTCAAGTGTGACAGTCAAAGCACAGTACACCCCGTGCGCAATAAGACTGGCAAGGCTCGATACAGT;CE=1.98643	GT:GL:GQ:FT:RCL:RC:RCR:CN:DR:DV:RR:RV	1/1:-21.0982,-1.80434,0:18:PASS:3119:11:3073:0:0:48:0:6	0/0:0,-3.00918,-36.2989:30:PASS:3597:6338:3617:2:17:0:10:0	1/1:-159.196,-12.94,0:129:PASS:7358:46:3301:0:0:13:0:43	0/0:0,-18.6561,-223.092:10000:PASS:12210:30200:14436:2:101:0:62:0	unitig_3	2150219	1167	N	<DEL>	.	.	SVTYPE=DEL;STRANDS=+-:35;SVLEN=-350;END=2150569;CIPOS=-10,9;CIEND=-2,0;CIPOS95=0,0;CIEND95=0,0;SU=35;PE=10;SR=25	GT:SU:PE:SR	./.:12:10:2	./.:0:0:0	./.:23:0:23	./.:0:0:0
unitig_3	2150220	2150565	DEL	-	-	-	345	0	1	0	1	0	TM1119_g8642		unitig_3	2150220	2150565	PA7_GAP	-	-	-	unitig_3	2150217	DEL00002404	G	<DEL>	.	PASS	PRECISE;SVTYPE=DEL;SVMETHOD=EMBL.DELLYv0.7.7;CHR2=unitig_3;END=2150565;PE=13;MAPQ=60;CT=3to5;CIPOS=-4,4;CIEND=-4,4;INSLEN=0;HOMLEN=5;SR=10;SRQ=0.960452;CONSENSUS=AGTTGCTGGAATCCGCGCACTGTATTATCCTCCGTAGGAGCCCGATGATAACGAGACCACTGGACTGGGTGCTCACACAGACGTGCAATGTGCGAAAATGGGGGAGTTGACTTCAAGTGTGACAGTCAAAGCACAGTACACCCCGTGCGCAATAAGACTGGCAAGGCTCGATACAGT;CE=1.98643	GT:GL:GQ:FT:RCL:RC:RCR:CN:DR:DV:RR:RV	1/1:-21.0982,-1.80434,0:18:PASS:3119:11:3073:0:0:48:0:6	0/0:0,-3.00918,-36.2989:30:PASS:3597:6338:3617:2:17:0:10:0	1/1:-159.196,-12.94,0:129:PASS:7358:46:3301:0:0:13:0:43	0/0:0,-18.6561,-223.092:10000:PASS:12210:30200:14436:2:101:0:62:0	unitig_3	2150219	1167	N	<DEL>	.	.	SVTYPE=DEL;STRANDS=+-:35;SVLEN=-350;END=2150569;CIPOS=-10,9;CIEND=-2,0;CIPOS95=0,0;CIEND95=0,0;SU=35;PE=10;SR=25	GT:SU:PE:SR	./.:12:10:2	./.:0:0:0	./.:23:0:23	./.:0:0:0
unitig_3	2154120	2155230	DEL	-	DEL	-	1110	1	0	0	1	0	TM1119_g8644		unitig_3	2154120	2155230	PA7_GAP	-	PM448_GAP	-	unitig_3	2154116	DEL00002406	A	<DEL>	.	PASS	PRECISE;SVTYPE=DEL;SVMETHOD=EMBL.DELLYv0.7.7;CHR2=unitig_3;END=2155231;PE=51;MAPQ=60;CT=3to5;CIPOS=-4,4;CIEND=-4,4;INSLEN=0;HOMLEN=3;SR=10;SRQ=0.963855;CONSENSUS=TTAATTGAGCTTTGCACTCAGCCCAAGCTCGCCTTAACAGTAGTTTAATATCAGTTGATGAAGTCCAACAATTTCTTCCTAGACAGTCTCGACATGCGAAGACGCCTCGCGCCCCCTAGATTGGAATGTGGATTGCCAGCCCAGTAGGGCTTACACTTGCTGCCAC;CE=1.99261	GT:GL:GQ:FT:RCL:RC:RCR:CN:DR:DV:RR:RV	1/1:-20.2986,-1.80473,0:18:PASS:127:0:126:0:0:51:0:6	0/0:0,-4.81413,-56.5976:48:PASS:65:145:65:2:24:0:16:0	1/1:-81.1956,-6.91925,0:69:PASS:77:2:119:0:0:37:0:23	0/0:0,-18.0532,-214.191:10000:PASS:293:536:290:2:95:0:60:0	unitig_3	2154119	1169	N	<DEL>	.	.	SVTYPE=DEL;STRANDS=+-:103;SVLEN=-1111;END=2155230;CIPOS=-2,1;CIEND=-10,9;CIPOS95=0,0;CIEND95=0,0;SU=103;PE=89;SR=14	GT:SU:PE:SR	./.:51:51:0	./.:0:0:0	./.:52:38:14	./.:0:0:0
unitig_3	2363365	2371512	DEL	-	DEL	-	8147	0	1	0	1	3	TM1119_g8718	TM1119_g8719;TM1119_g8720;TM1119_g8721	unitig_3	2363365	2371512	PA7_GAP	-	PM448_GAP	-	unitig_3	2363363	DEL00002411	G	<DEL>	.	PASS	PRECISE;SVTYPE=DEL;SVMETHOD=EMBL.DELLYv0.7.7;CHR2=unitig_3;END=2371513;PE=38;MAPQ=60;CT=3to5;CIPOS=-3,3;CIEND=-3,3;INSLEN=0;HOMLEN=3;SR=10;SRQ=0.992754;CONSENSUS=AAACAAATCCACCCCCCACACTATATGTTAGATTCATACTGTTCATATTCATAAGTGGTACACATACCATGACAGAGCCGCAGGTCTGTACGAGAATGTTGGCATAAGGTGAAAAGACGGGAAGCTTGTAAATCAATA;CE=1.95744	GT:GL:GQ:FT:RCL:RC:RCR:CN:DR:DV:RR:RV	1/1:-43.6982,-3.61061,0:36:PASS:701:0:871:0:0:38:0:12	0/0:0,-6.31908,-77.5974:63:PASS:595:1490:964:2:28:0:21:0	1/1:-72.0975,-6.01806,0:60:PASS:667:6:1329:0:0:30:0:20	0/0:0,-22.2679,-271.792:10000:PASS:2386:4456:2089:2:121:0:74:0	unitig_3	2363364	1171	N	<DEL>	.	.	SVTYPE=DEL;STRANDS=+-:89;SVLEN=-8148;END=2371512;CIPOS=-2,0;CIEND=-10,9;CIPOS95=0,0;CIEND95=0,0;SU=89;PE=68;SR=21	GT:SU:PE:SR	./.:43:38:5	./.:0:0:0	./.:46:30:16	./.:0:0:0
unitig_3	2427138	2427235	-	DEL	-	-	97	1	0	0	1	0	TM1119_g8739		unitig_3	2427138	2427235	-	PM1118_GAP	-	-	unitig_3	2427137	DEL00002418	GGGTTATAGGAGTTCGCCGCCGCGCGGCAGGGCGTTCTCGGGAGATGAGAACACGATCAGGCGCTGGGAGGAATGCCCGTCGAGGGCTCTCTCTAATGT	G	.	PASS	PRECISE;SVTYPE=DEL;SVMETHOD=EMBL.DELLYv0.7.7;CHR2=unitig_3;END=2427236;PE=0;MAPQ=60;CT=3to5;CIPOS=-3,3;CIEND=-3,3;INSLEN=0;HOMLEN=3;SR=10;SRQ=0.982249;CONSENSUS=CGCTGCGCGTGCGCGTCGGCAGGCCGATGGCCGAGCGGTGCAGCGTGATGCGGAAGAAGGACATCGTATATGCGCGTATATGGGGCGTCGGTGTTCCGCTGTACTGGGCTGGGTCTATGCGATTGAGGTCGGTTAGCAGGAGAATGGACTGAAGGTGTTTTTAATGGCG;CE=1.91316	GT:GL:GQ:FT:RCL:RC:RCR:CN:DR:DV:RR:RV	0/0:0,-2.40597,-26.9977:24:PASS:545:1381:905:2:0:0:8:0	1/1:-361.685,-30.6901,0:10000:PASS:4971:69:3711:0:0:0:0:102	0/0:0,-27.3794,-317.886:10000:PASS:6099:12411:5644:2:0:0:91:0	0/0:0,-14.7432,-172.593:147:PASS:2691:6369:3160:2:0:0:49:0	unitig_3	2427137	1172	N	<DEL>	.	.	SVTYPE=DEL;STRANDS=+-:61;SVLEN=-98;END=2427235;CIPOS=0,0;CIEND=0,0;CIPOS95=0,0;CIEND95=0,0;SU=61;PE=0;SR=61	GT:SU:PE:SR	./.:0:0:0	./.:61:0:61	./.:0:0:0	./.:0:0:0
unitig_3	2776695	2776883	-	DEL	-	-	188	0	0	0	0	0			unitig_3	2776695	2776883	-	PM1118_GAP	-	-	unitig_3	2776696	DEL00002444	TATACCAGAGTAATAAACGTTATTTAACCGAGTTGAATATACTAGAAAACCAGGGTTGAGAATACCTGATTGAGGCTTCGAAGTTCTATTTATTTCTATAGCCCCGCTGGTCTTGACAAAAGTAGCAACTCCCTTGTCTGAAAAGTCACGATTCCCACTCAGAATTAACAATTATTACCCCGGCAGAG	T	.	PASS	PRECISE;SVTYPE=DEL;SVMETHOD=EMBL.DELLYv0.7.7;CHR2=unitig_3;END=2776884;PE=0;MAPQ=60;CT=3to5;CIPOS=-2,2;CIEND=-2,2;INSLEN=0;HOMLEN=1;SR=10;SRQ=0.994083;CONSENSUS=TATCGTGGCCAATTTACGGATACAATGAGTTGTCAGGTCGTCTAGTCAGAGCTCTGCGATGTACCTAGCTTAATTTTGGACATGCTTGTGTATATTGCGGCGAGGCTATGAACACCCTGCTGATCTGCTCCTGGGGCCAACACCGTCTCAGAGTACCTTCGCCATGCCT;CE=1.98992	GT:GL:GQ:FT:RCL:RC:RCR:CN:DR:DV:RR:RV	./.:0,0,0:0:LowQual:1585:0:1646:0:0:0:0:0	./.:0,0,0:0:LowQual:2434:25:2993:0:0:0:0:0	1/1:-230.392,-18.9572,0:10000:PASS:4071:36:4357:0:0:0:0:63	./.:0,0,0:0:LowQual:4836:4:5580:0:0:0:0:0	unitig_3	2776696	1178	N	<DEL>	.	.	SVTYPE=DEL;STRANDS=+-:67;SVLEN=-187;END=2776883;CIPOS=-10,7;CIEND=0,0;CIPOS95=0,0;CIEND95=0,0;SU=67;PE=0;SR=67	GT:SU:PE:SR	./.:0:0:0	./.:24:0:24	./.:43:0:43	./.:0:0:0
unitig_3	2776697	2776883	-	-	DEL	-	186	0	0	0	0	0			unitig_3	2776697	2776883	-	-	PM448_GAP	-	unitig_3	2776696	DEL00002444	TATACCAGAGTAATAAACGTTATTTAACCGAGTTGAATATACTAGAAAACCAGGGTTGAGAATACCTGATTGAGGCTTCGAAGTTCTATTTATTTCTATAGCCCCGCTGGTCTTGACAAAAGTAGCAACTCCCTTGTCTGAAAAGTCACGATTCCCACTCAGAATTAACAATTATTACCCCGGCAGAG	T	.	PASS	PRECISE;SVTYPE=DEL;SVMETHOD=EMBL.DELLYv0.7.7;CHR2=unitig_3;END=2776884;PE=0;MAPQ=60;CT=3to5;CIPOS=-2,2;CIEND=-2,2;INSLEN=0;HOMLEN=1;SR=10;SRQ=0.994083;CONSENSUS=TATCGTGGCCAATTTACGGATACAATGAGTTGTCAGGTCGTCTAGTCAGAGCTCTGCGATGTACCTAGCTTAATTTTGGACATGCTTGTGTATATTGCGGCGAGGCTATGAACACCCTGCTGATCTGCTCCTGGGGCCAACACCGTCTCAGAGTACCTTCGCCATGCCT;CE=1.98992	GT:GL:GQ:FT:RCL:RC:RCR:CN:DR:DV:RR:RV	./.:0,0,0:0:LowQual:1585:0:1646:0:0:0:0:0	./.:0,0,0:0:LowQual:2434:25:2993:0:0:0:0:0	1/1:-230.392,-18.9572,0:10000:PASS:4071:36:4357:0:0:0:0:63	./.:0,0,0:0:LowQual:4836:4:5580:0:0:0:0:0	unitig_3	2776696	1178	N	<DEL>	.	.	SVTYPE=DEL;STRANDS=+-:67;SVLEN=-187;END=2776883;CIPOS=-10,7;CIEND=0,0;CIPOS95=0,0;CIEND95=0,0;SU=67;PE=0;SR=67	GT:SU:PE:SR	./.:0:0:0	./.:24:0:24	./.:43:0:43	./.:0:0:0
unitig_3	3007149	3009963	-	DEL	-	-	2814	1	1	0	2	1	TM1119_g8909;TM1119_g8911	TM1119_g8910	unitig_3	3007149	3009963	-	PM1118_GAP	-	-	unitig_3	3007145	DEL00002463	A	<DEL>	.	PASS	PRECISE;SVTYPE=DEL;SVMETHOD=EMBL.DELLYv0.7.7;CHR2=unitig_3;END=3009964;PE=34;MAPQ=60;CT=3to5;CIPOS=-5,5;CIEND=-5,5;INSLEN=0;HOMLEN=4;SR=10;SRQ=0.983051;CONSENSUS=GGACCTCATGTCACCTACGCTAAGAAGGGTGTGCTTAAGACATAAGTCCCACATTCGGTGGTGCAGCCACTGTTGACTAACCAAGATATCGCTGAGCAAGGCGATATCGCATGACGGTGGCCGGACATGGACAAAGCATCACGACAACCCCTTATTGCCCGGTCCGCCCCCTGGATT;CE=1.9892	GT:GL:GQ:FT:RCL:RC:RCR:CN:DR:DV:RR:RV	0/0:0,-2.70757,-31.5983:27:PASS:292:584:283:2:17:0:9:0	1/1:-121.795,-6.83236,0:68:PASS:159:9:334:0:0:34:1:35	0/0:0,-20.1567,-233.788:10000:PASS:323:899:583:2:31:0:67:0	0/0:0,-19.2565,-227.691:10000:PASS:791:1496:685:2:74:0:64:0	unitig_3	3007148	1186	N	<DEL>	.	.	SVTYPE=DEL;STRANDS=+-:61;SVLEN=-2815;END=3009963;CIPOS=-2,0;CIEND=-10,9;CIPOS95=0,0;CIEND95=0,0;SU=61;PE=35;SR=26	GT:SU:PE:SR	./.:0:0:0	./.:61:35:26	./.:0:0:0	./.:0:0:0
unitig_3	3402280	3402346	-	-	DEL	DEL	66	0	0	0	0	0			unitig_3	3402280	3402346	-	-	PM448_GAP	PM449_GAP	unitig_3	3402277	DEL00002485	CCAAAACAAGCCAGTTATCGATATAGCCTATCCACCAGGGGATGGAGGGATTCTGATCTAGTACACGTCG	C	.	PASS	PRECISE;SVTYPE=DEL;SVMETHOD=EMBL.DELLYv0.7.7;CHR2=unitig_3;END=3402347;PE=0;MAPQ=60;CT=3to5;CIPOS=-3,3;CIEND=-3,3;INSLEN=0;HOMLEN=3;SR=10;SRQ=0.952941;CONSENSUS=CCATGTGTTGTTGGCCGTTATCAGTCCTTGATTCCTCTCCCAACATTGTCGTTGTCTCGTTGGCCTGTCTGATGGCTTTGAACATCCACCTTGACTCAAGGTCACGATTCTGGGCAATTGCAACTCTCTCGACACTAAAGCATGGCTGTAAAATATATTATC;CE=1.96815	GT:GL:GQ:FT:RCL:RC:RCR:CN:DR:DV:RR:RV	0/0:0,-4.81353,-56.0971:48:PASS:736:1501:753:2:0:0:16:0	0/0:0,-7.22179,-87.1971:72:PASS:1300:1911:827:2:0:0:24:0	1/1:-233.093,-18.9579,0:10000:PASS:1814:118:1190:0:0:0:0:63	1/1:-215.993,-14.3558,0:144:PASS:1616:144:1312:0:0:0:1:60	unitig_3	3402279	1195	N	<DEL>	.	.	SVTYPE=DEL;STRANDS=+-:97;SVLEN=-67;END=3402346;CIPOS=0,0;CIEND=0,0;CIPOS95=0,0;CIEND95=0,0;SU=97;PE=0;SR=97	GT:SU:PE:SR	./.:0:0:0	./.:0:0:0	./.:50:0:50	./.:47:0:47
unitig_3	4051484	4053555	-	DEL	DEL	DEL	2071	0	0	0	0	1		TM1119_g9222	unitig_3	4051484	4053555	-	PM1118_GAP	PM448_GAP	PM449_GAP	unitig_3	4051482	DEL00002540	T	<DEL>	.	PASS	PRECISE;SVTYPE=DEL;SVMETHOD=EMBL.DELLYv0.7.7;CHR2=unitig_3;END=4053556;PE=28;MAPQ=60;CT=3to5;CIPOS=-3,3;CIEND=-3,3;INSLEN=0;HOMLEN=2;SR=10;SRQ=0.964497;CONSENSUS=CAGCATCACTAAGTCTTGCACAAGGCAAAGTCGTATCATAGGGCTCGCCCGGGCAGCGGTGATACCCGATAGTGATCTAAACTGAGACTTTATTCTGAGTCCACTGTTTACACCATCACACTTCGGCAGATATACCCAACAACTTCAGCTCCCTCAATAACCTGCCGTT;CE=1.98114	GT:GL:GQ:FT:RCL:RC:RCR:CN:DR:DV:RR:RV	0/0:0,-2.40733,-29.1991:24:PASS:234:488:252:2:47:0:8:0	1/1:-92.9965,-7.82331,0:78:PASS:166:3:304:0:0:28:0:26	1/1:-79.9961,-6.91975,0:69:PASS:128:2:453:0:0:38:0:23	1/1:-235.49,-19.858,0:10000:PASS:543:0:487:0:0:90:0:66	unitig_3	4051476	1239	N	<DEL>	.	.	SVTYPE=DEL;STRANDS=+-:220;SVLEN=-2079;END=4053555;CIPOS=0,0;CIEND=0,0;CIPOS95=0,0;CIEND95=0,0;SU=220;PE=156;SR=64	GT:SU:PE:SR	./.:0:0:0	./.:45:28:17	./.:52:38:14	./.:123:90:33
unitig_3	4106080	4106224	DEL	-	-	-	144	0	0	0	0	0			unitig_3	4106080	4106224	PA7_GAP	-	-	-	unitig_3	4106081	DEL00002546	CTCAGTCAGAGCATATATAGGTCTACACAGTTGGAACCATTAGCTATAGCAATCAAGACAGAGATAGCTACGAGTACAGACACCGGAGTAGTTTAGCTTGCCATATAGACAAAGGCCTAGCTCAATCGCATCAAGATACTTCTA	C	.	PASS	PRECISE;SVTYPE=DEL;SVMETHOD=EMBL.DELLYv0.7.7;CHR2=unitig_3;END=4106225;PE=0;MAPQ=60;CT=3to5;CIPOS=-6,6;CIEND=-6,6;INSLEN=0;HOMLEN=6;SR=10;SRQ=0.984694;CONSENSUS=CCTTCCTATTTCGTCGACCTCTACATTACAGTCGAACCTGACAAAGAAATAGATTGTGTCATCACAGACCTTCTCATTAATGACCCAGATCTAACCTCACTCAGTTGGGGACGACAACGACACCATCCCGGATATCCCACCAATTCTTCTCTTGCAGATTGTGAACCACAATTGGCACTTGCTTGTGGCATGAGAA;CE=1.97147	GT:GL:GQ:FT:RCL:RC:RCR:CN:DR:DV:RR:RV	1/1:-61.4971,-5.11457,0:51:PASS:1459:64:1578:0:0:0:0:17	1/1:-107.695,-9.02609,0:90:PASS:1960:98:1611:0:0:0:0:30	1/1:-154.795,-12.6387,0:126:PASS:3080:179:1737:0:0:0:0:42	1/1:-250.592,-20.7632,0:10000:PASS:5002:241:4609:0:0:0:0:69	unitig_3	4106086	1240	N	<DEL>	.	.	SVTYPE=DEL;STRANDS=+-:120;SVLEN=-138;END=4106224;CIPOS=0,0;CIEND=0,0;CIPOS95=0,0;CIEND95=0,0;SU=120;PE=0;SR=120	GT:SU:PE:SR	./.:10:0:10	./.:22:0:22	./.:32:0:32	./.:56:0:56
unitig_3	4106087	4106224	-	DEL	DEL	DEL	137	0	0	0	0	0			unitig_3	4106087	4106224	-	PM1118_GAP	PM448_GAP	PM449_GAP	unitig_3	4106081	DEL00002546	CTCAGTCAGAGCATATATAGGTCTACACAGTTGGAACCATTAGCTATAGCAATCAAGACAGAGATAGCTACGAGTACAGACACCGGAGTAGTTTAGCTTGCCATATAGACAAAGGCCTAGCTCAATCGCATCAAGATACTTCTA	C	.	PASS	PRECISE;SVTYPE=DEL;SVMETHOD=EMBL.DELLYv0.7.7;CHR2=unitig_3;END=4106225;PE=0;MAPQ=60;CT=3to5;CIPOS=-6,6;CIEND=-6,6;INSLEN=0;HOMLEN=6;SR=10;SRQ=0.984694;CONSENSUS=CCTTCCTATTTCGTCGACCTCTACATTACAGTCGAACCTGACAAAGAAATAGATTGTGTCATCACAGACCTTCTCATTAATGACCCAGATCTAACCTCACTCAGTTGGGGACGACAACGACACCATCCCGGATATCCCACCAATTCTTCTCTTGCAGATTGTGAACCACAATTGGCACTTGCTTGTGGCATGAGAA;CE=1.97147	GT:GL:GQ:FT:RCL:RC:RCR:CN:DR:DV:RR:RV	1/1:-61.4971,-5.11457,0:51:PASS:1459:64:1578:0:0:0:0:17	1/1:-107.695,-9.02609,0:90:PASS:1960:98:1611:0:0:0:0:30	1/1:-154.795,-12.6387,0:126:PASS:3080:179:1737:0:0:0:0:42	1/1:-250.592,-20.7632,0:10000:PASS:5002:241:4609:0:0:0:0:69	unitig_3	4106086	1240	N	<DEL>	.	.	SVTYPE=DEL;STRANDS=+-:120;SVLEN=-138;END=4106224;CIPOS=0,0;CIEND=0,0;CIPOS95=0,0;CIEND95=0,0;SU=120;PE=0;SR=120	GT:SU:PE:SR	./.:10:0:10	./.:22:0:22	./.:32:0:32	./.:56:0:56
unitig_3	4178390	4180131	-	DEL	DEL	DEL	1741	0	0	0	0	1		TM1119_g9268	unitig_3	4178390	4180131	-	PM1118_GAP	PM448_GAP	PM449_GAP	unitig_3	4178387	DEL00002551	T	<DEL>	.	PASS	PRECISE;SVTYPE=DEL;SVMETHOD=EMBL.DELLYv0.7.7;CHR2=unitig_3;END=4180132;PE=47;MAPQ=60;CT=3to5;CIPOS=-3,3;CIEND=-3,3;INSLEN=0;HOMLEN=3;SR=10;SRQ=0.974359;CONSENSUS=TTCTTGCAGCCACCTTTTCATCAGCCACTCAGCTGGTCCAGGAATTTCTGCAATAAGAATGTTTCTTGAGATTTCGGAAGAGGAGCGCCCTTCTGTACAGCTGTGTTTAAGATGGAT;CE=1.98383	GT:GL:GQ:FT:RCL:RC:RCR:CN:DR:DV:RR:RV	1/1:-73.1976,-6.0182,0:60:PASS:183:0:185:0:0:47:0:20	1/1:-69.898,-5.71759,0:57:PASS:152:1:95:0:0:23:0:19	1/1:-88.8966,-7.5223,0:75:PASS:227:0:112:0:0:29:0:25	1/1:-154.495,-12.6387,0:126:PASS:436:2:536:0:0:86:0:42	unitig_3	4178389	1244	N	<DEL>	.	.	SVTYPE=DEL;STRANDS=+-:260;SVLEN=-1742;END=4180131;CIPOS=0,0;CIEND=0,0;CIPOS95=0,0;CIEND95=0,0;SU=260;PE=191;SR=69	GT:SU:PE:SR	./.:58:48:10	./.:38:23:15	./.:51:32:19	./.:113:88:25
unitig_3	4178390	4180132	DEL	-	-	-	1742	0	0	0	0	1		TM1119_g9268	unitig_3	4178390	4180132	PA7_GAP	-	-	-	unitig_3	4178387	DEL00002551	T	<DEL>	.	PASS	PRECISE;SVTYPE=DEL;SVMETHOD=EMBL.DELLYv0.7.7;CHR2=unitig_3;END=4180132;PE=47;MAPQ=60;CT=3to5;CIPOS=-3,3;CIEND=-3,3;INSLEN=0;HOMLEN=3;SR=10;SRQ=0.974359;CONSENSUS=TTCTTGCAGCCACCTTTTCATCAGCCACTCAGCTGGTCCAGGAATTTCTGCAATAAGAATGTTTCTTGAGATTTCGGAAGAGGAGCGCCCTTCTGTACAGCTGTGTTTAAGATGGAT;CE=1.98383	GT:GL:GQ:FT:RCL:RC:RCR:CN:DR:DV:RR:RV	1/1:-73.1976,-6.0182,0:60:PASS:183:0:185:0:0:47:0:20	1/1:-69.898,-5.71759,0:57:PASS:152:1:95:0:0:23:0:19	1/1:-88.8966,-7.5223,0:75:PASS:227:0:112:0:0:29:0:25	1/1:-154.495,-12.6387,0:126:PASS:436:2:536:0:0:86:0:42	unitig_3	4178389	1244	N	<DEL>	.	.	SVTYPE=DEL;STRANDS=+-:260;SVLEN=-1742;END=4180131;CIPOS=0,0;CIEND=0,0;CIPOS95=0,0;CIEND95=0,0;SU=260;PE=191;SR=69	GT:SU:PE:SR	./.:58:48:10	./.:38:23:15	./.:51:32:19	./.:113:88:25
unitig_3	4250889	4251786	-	DEL	-	-	897	0	0	1	1	0	TM1119_g9292		unitig_3	4250889	4251786	-	PM1118_GAP	-	-	unitig_3	4250888	DEL00002556	A	<DEL>	.	PASS	PRECISE;SVTYPE=DEL;SVMETHOD=EMBL.DELLYv0.7.7;CHR2=unitig_3;END=4251787;PE=51;MAPQ=60;CT=3to5;CIPOS=-2,2;CIEND=-2,2;INSLEN=0;HOMLEN=1;SR=10;SRQ=1;CONSENSUS=ATACTGCTACTGTTGCCGTCCCGACGCCCCAGGGGCGGATTGCCATAATCTCGTTCCGTCTGCGATCAAGGCTCTCGTGCAGGAGTCTCGTCGACGGCCAGTCATCAGTGCCCAGTCATAGTCATTACAGCATCCTGACATCCGAGGGCTGACATTATCACAGTGT;CE=1.98279	GT:GL:GQ:FT:RCL:RC:RCR:CN:DR:DV:RR:RV	0/0:0,-2.40776,-30.8995:24:PASS:80:136:128:1:0:8:8:0	1/1:-153.99,-13.5367,0:135:PASS:83:1:149:0:0:51:0:45	0/0:0,-19.2583,-232.892:10000:PASS:83:691:248:4:79:0:64:0	0/0:0,-17.753,-212.792:10000:PASS:229:399:250:2:81:0:59:0	unitig_3	4250888	1246	N	<DEL>	.	.	SVTYPE=DEL;STRANDS=+-:39;SVLEN=-898;END=4251786;CIPOS=0,0;CIEND=0,0;CIPOS95=0,0;CIEND95=0,0;SU=39;PE=0;SR=39	GT:SU:PE:SR	./.:0:0:0	./.:38:0:38	./.:0:0:0	./.:0:0:0
unitig_3	4251097	4251263	DEL	-	-	-	166	0	0	1	1	0	TM1119_g9292		unitig_3	4251097	4251263	PA7_GAP	-	-	-	unitig_3	4251088	DEL00002557	AGTCCCAGCTTGCCGCCCCGAAAGCGTGCTCGCCCGACACGTACGGCTCAGCAGTCCCTACACCTCGATGGCGACCAGGCCGAGGCGACGGCGAGGCTAGACGAGCTCCTCGGCCCCGCCACATCGTCTCCCGCACGCGGCGAGCAGCCGCATCACTTCTCGTCGCAGTCCTTCTC	A	.	PASS	PRECISE;SVTYPE=DEL;SVMETHOD=EMBL.DELLYv0.7.7;CHR2=unitig_3;END=4251264;PE=0;MAPQ=60;CT=3to5;CIPOS=-9,9;CIEND=-9,9;INSLEN=0;HOMLEN=9;SR=10;SRQ=1;CONSENSUS=AGGAGGTGGACTTTCACGAGTTGGAGATGGGAGAGGCGGAACAGGAGGGACCGGAGCTTCCCAGTCCCAGCCCGAGGCCGATGCCGCGGAGAGCTTCGACGACCGCTGCTACCTGGCAGAAGGC;CE=1.89835	GT:GL:GQ:FT:RCL:RC:RCR:CN:DR:DV:RR:RV	1/1:-68.2956,-6.01622,0:60:PASS:1886:137:2290:0:0:0:0:20	0/0:0,-0.300857,-3.39983:5:LowQual:88:44:0:1:0:0:1:0	0/0:0,-24.0655,-274.483:10000:PASS:6909:17447:12972:2:0:0:80:0	0/0:0,-11.7325,-134.192:117:PASS:5280:6950:5581:1:0:0:39:0	unitig_3	4251096	1247	N	<DEL>	.	.	SVTYPE=DEL;STRANDS=+-:21;SVLEN=-167;END=4251263;CIPOS=-10,9;CIEND=-10,9;CIPOS95=0,0;CIEND95=0,0;SU=21;PE=6;SR=15	GT:SU:PE:SR	./.:20:5:15	./.:1:1:0	./.:0:0:0	./.:0:0:0
unitig_3	4251559	4251793	DEL	-	-	-	234	0	0	1	1	0	TM1119_g9292		unitig_3	4251559	4251793	PA7_GAP	-	-	-	unitig_3	4251553	DEL00002558	ATCATCGAGGCGAAGCGTGCTTTCGCCGGGCTGGATGTCCGGAACAACCCGGACGACAAGACCGCGAAGGGGAGAGAGCTGGTCGCCCAGTGCCTGGGCGAGGCGGTTGCCACATACCTGGAGCGCCCTGACCAATCGTCAAACCAGTAAGTGAGCCATGTTCCCGGGTGCTGATCGGGTCCGGGCCTACTCATGCCCTTCTCCTTTCTCTCTTCAGTGTTTGTTGCAGACCATGTCTCGTCGACGGCCAG	A	.	PASS	PRECISE;SVTYPE=DEL;SVMETHOD=EMBL.DELLYv0.7.7;CHR2=unitig_3;END=4251804;PE=0;MAPQ=60;CT=3to5;CIPOS=-7,7;CIEND=-7,7;INSLEN=0;HOMLEN=10;SR=10;SRQ=1;CONSENSUS=AAATGAGCCGGGACGGGGACGGGCCGTGGGTCGTGGCGGACGATGCGATGGCCATCATCAGTGCCCAGTCATAGTCATTACAGCATCCTGACATCCGAGGGCTGACATTATC;CE=1.96837	GT:GL:GQ:FT:RCL:RC:RCR:CN:DR:DV:RR:RV	1/1:-88.295,-7.5207,0:75:PASS:2660:119:3459:0:0:0:0:25	0/0:0,-4.51347,-53.298:45:PASS:0:546:4133:0:0:0:15:0	0/0:0,-25.575,-301.087:10000:PASS:15056:26297:11111:2:0:0:85:0	0/0:0,-15.946,-187.991:157:PASS:8307:15435:10558:2:0:0:53:0	unitig_3	4251558	1248	N	<DEL>	.	.	SVTYPE=DEL;STRANDS=+-:16;SVLEN=-245;END=4251803;CIPOS=-3,1;CIEND=-2,1;CIPOS95=0,0;CIEND95=0,0;SU=16;PE=0;SR=16	GT:SU:PE:SR	./.:16:0:16	./.:0:0:0	./.:0:0:0	./.:0:0:0
unitig_3	4310875	4314911	DEL	-	DEL	DEL	4036	0	0	0	0	1		TM1119_g9307	unitig_3	4310875	4314911	PA7_GAP	-	PM448_GAP	PM449_GAP	unitig_3	4310868	DEL00002561	T	<DEL>	.	PASS	PRECISE;SVTYPE=DEL;SVMETHOD=EMBL.DELLYv0.7.7;CHR2=unitig_3;END=4314912;PE=25;MAPQ=60;CT=3to5;CIPOS=-8,8;CIEND=-8,8;INSLEN=0;HOMLEN=8;SR=10;SRQ=0.987805;CONSENSUS=CTAAACGATGTAGTACTTCCACTCAATCGCTTCTACCGAGACCGAATTGTCAAAGTTGTGATAAATGCCAACAAGATTCCCAGTCAACTGATACAAAATGGCCGCCTTGGAACGCAGAGAATACGGGGCCGCTTCCATGATGTAGGTGGGGGCTCCCGGTGAAC;CE=1.99341	GT:GL:GQ:FT:RCL:RC:RCR:CN:DR:DV:RR:RV	1/1:-40.3971,-3.6095,0:36:PASS:459:0:542:0:0:52:0:12	0/0:0,-4.51328,-52.3978:45:PASS:248:664:438:2:26:0:15:0	1/1:-109.696,-9.32753,0:93:PASS:297:0:789:0:0:24:0:31	1/1:-291.589,-21.8749,0:10000:PASS:1173:3:1044:0:0:105:1:83	unitig_3	4310874	1251	N	<DEL>	.	.	SVTYPE=DEL;STRANDS=+-:277;SVLEN=-4037;END=4314911;CIPOS=0,0;CIEND=0,0;CIPOS95=0,0;CIEND95=0,0;SU=277;PE=189;SR=88	GT:SU:PE:SR	./.:55:52:3	./.:0:0:0	./.:55:27:28	./.:167:110:57
unitig_3	4342923	4344501	-	DEL	-	-	1578	0	0	1	1	0	TM1119_g9319		unitig_3	4342923	4344501	-	PM1118_GAP	-	-	unitig_3	4342921	DEL00002564	C	<DEL>	.	PASS	PRECISE;SVTYPE=DEL;SVMETHOD=EMBL.DELLYv0.7.7;CHR2=unitig_3;END=4344502;PE=38;MAPQ=60;CT=3to5;CIPOS=-2,2;CIEND=-2,2;INSLEN=0;HOMLEN=2;SR=10;SRQ=1;CONSENSUS=CTGAGATGACTTTGCTACTGGATCCGCCAGACTCGGCGTTACCAAATAATCAAGACTCAGATATGCCCAACGAAATGCGAAGGGACCAGAGCGTGCGAATATGATGAAAGACTTCTGGACACTTATTCACAGAAACTACGAAGGCTCAATCCCAGCAGGCCTCATCTTC;CE=1.98035	GT:GL:GQ:FT:RCL:RC:RCR:CN:DR:DV:RR:RV	0/0:0,-6.01892,-75.5983:60:PASS:191:376:205:2:55:0:20:0	1/1:-148.796,-9.63878,0:96:PASS:158:6:301:0:0:38:1:41	0/0:0,-10.8315,-128.594:108:PASS:214:436:438:1:57:0:36:0	0/0:0,-19.2583,-232.792:10000:PASS:455:895:418:2:113:0:64:0	unitig_3	4342922	1252	N	<DEL>	.	.	SVTYPE=DEL;STRANDS=+-:68;SVLEN=-1579;END=4344501;CIPOS=-10,9;CIEND=-2,0;CIPOS95=0,0;CIEND95=0,0;SU=68;PE=38;SR=30	GT:SU:PE:SR	./.:0:0:0	./.:68:38:30	./.:0:0:0	./.:0:0:0
unitig_3	4350433	4351127	DEL	-	DEL	-	694	1	0	0	1	0	TM1119_g9322		unitig_3	4350433	4351127	PA7_GAP	-	PM448_GAP	-	unitig_3	4350431	DEL00002565	A	<DEL>	.	PASS	PRECISE;SVTYPE=DEL;SVMETHOD=EMBL.DELLYv0.7.7;CHR2=unitig_3;END=4351128;PE=43;MAPQ=60;CT=3to5;CIPOS=-3,3;CIEND=-3,3;INSLEN=0;HOMLEN=2;SR=10;SRQ=0.985075;CONSENSUS=CTAGAAATTCGTCAATCATCTTCTGCTGACCTTTGTTCCGCATTGGGAACCAATCGGTTGGATAAATGATGCTCGAAGATAGTGACCCGAAGTCCATTGAGAGGCTTCTCGAAGCTAATAGGGGTGTACAACCT;CE=1.99334	GT:GL:GQ:FT:RCL:RC:RCR:CN:DR:DV:RR:RV	1/1:-40.1965,-3.6089,0:36:PASS:76:0:80:0:0:43:0:12	0/0:0,-4.5137,-54.3983:45:PASS:49:99:34:2:23:0:15:0	1/1:-27.7988,-2.40703,0:24:PASS:31:0:39:0:0:12:0:8	0/0:0,-22.5568,-255.78:10000:PASS:201:395:206:2:119:0:75:0	unitig_3	4350432	1253	N	<DEL>	.	.	SVTYPE=DEL;STRANDS=+-:66;SVLEN=-695;END=4351127;CIPOS=-10,9;CIEND=-3,0;CIPOS95=0,0;CIEND95=0,0;SU=66;PE=55;SR=11	GT:SU:PE:SR	./.:50:43:7	./.:0:0:0	./.:16:12:4	./.:0:0:0
unitig_3	4372010	4372366	DEL	-	DEL	-	356	0	0	0	0	0			unitig_3	4372010	4372366	PA7_GAP	-	PM448_GAP	-	unitig_3	4372010	DEL00002568	G	<DEL>	.	PASS	IMPRECISE;SVTYPE=DEL;SVMETHOD=EMBL.DELLYv0.7.7;CHR2=unitig_3;END=4372367;PE=53;MAPQ=60;CT=3to5;CIPOS=-65,65;CIEND=-65,65	GT:GL:GQ:FT:RCL:RC:RCR:CN:DR:DV:RR:RV	1/1:-302.3,-15.9541,0:10000:PASS:4590:15:3579:0:0:53:0:0	0/0:0,-7.22469,-141.7:72:PASS:5455:7656:1266:2:24:0:0:0	1/1:-147.1,-7.52547,0:75:PASS:8468:313:3035:0:0:25:0:0	0/0:0,-23.1792,-456.5:10000:PASS:14151:31490:3615:4:77:0:0:0	unitig_3	4372009	1255	N	<DEL>	.	.	SVTYPE=DEL;STRANDS=+-:8;SVLEN=-357;END=4372366;CIPOS=-10,9;CIEND=-10,9;CIPOS95=0,0;CIEND95=0,0;SU=8;PE=1;SR=7	GT:SU:PE:SR	./.:0:0:0	./.:0:0:0	./.:8:1:7	./.:0:0:0
unitig_3	4391145	4391236	DEL	-	-	-	91	0	0	0	0	0			unitig_3	4391145	4391236	PA7_GAP	-	-	-	unitig_3	4391144	DEL00002570	GGCCGCCTCACCGAAGTTCTCGATCTGGAACAATTCAAATCCCTGTCAAGAAGCAGCCTCACATGGGAGACAACCACTTCTTATCAAATACCT	G	.	PASS	PRECISE;SVTYPE=DEL;SVMETHOD=EMBL.DELLYv0.7.7;CHR2=unitig_3;END=4391237;PE=0;MAPQ=60;CT=3to5;CIPOS=-1,1;CIEND=-1,1;INSLEN=0;HOMLEN=0;SR=10;SRQ=0.960265;CONSENSUS=GACGGGGAAGCAATGGAAAACAGCCAGGACTTCCAAGAAATTGTTCTAGTTTGACTGAAATGATGCACATTCAGAATAATTCTTCAGTTAGTCGTCGTAGAAAGACAACCGCTACAGGATAATTAACAGCCGTGAGGCAAGCTAT;CE=1.95843	GT:GL:GQ:FT:RCL:RC:RCR:CN:DR:DV:RR:RV	1/1:-47.7985,-3.91193,0:39:PASS:964:10:571:0:0:0:0:13	0/0:0,-6.92068,-83.097:69:PASS:1280:2117:850:2:0:0:23:0	0/0:0,-6.31838,-73.8968:63:PASS:1164:1932:1270:2:0:0:21:0	0/0:0,-6.01715,-73.7965:60:PASS:3462:3175:3929:1:0:0:20:0	unitig_3	4391144	1257	N	<DEL>	.	.	SVTYPE=DEL;STRANDS=+-:6;SVLEN=-92;END=4391236;CIPOS=-6,5;CIEND=-6,5;CIPOS95=0,0;CIEND95=0,0;SU=6;PE=0;SR=6	GT:SU:PE:SR	./.:6:0:6	./.:0:0:0	./.:0:0:0	./.:0:0:0
unitig_3	4409739	4414351	-	-	DEL	DEL	4612	0	0	0	0	1		TM1119_g9343	unitig_3	4409739	4414351		-	PM448_GAP	PM449_GAP	unitig_3	4409734	DEL00002572	T	<DEL>	.	PASS	PRECISE;SVTYPE=DEL;SVMETHOD=EMBL.DELLYv0.7.7;CHR2=unitig_3;END=4414363;PE=50;MAPQ=60;CT=3to5;CIPOS=-6,6;CIEND=-6,6;INSLEN=0;HOMLEN=7;SR=10;SRQ=0.983333;CONSENSUS=ATCTTAGCTGTGGCAGAAGCAATACGGATAGACATTGGCAGCGTCATAGTTATGCCAACCTGTATAAGTTTCAGCTCCTTCCATTTTATAATGAGAACCATTAGATATGAATACTCCGAC;CE=1.97012	GT:GL:GQ:FT:RCL:RC:RCR:CN:DR:DV:RR:RV	1/1:-56.8974,-4.8139,0:48:PASS:556:11:606:0:0:51:0:16	0/0:0,-4.81447,-57.298:48:PASS:415:519:353:1:17:0:16:0	1/1:-67.3974,-5.71694,0:57:PASS:436:0:406:0:0:45:0:19	1/1:-246.393,-19.8614,0:10000:PASS:1291:15:1155:0:0:84:0:66	unitig_3	4409738	1258	N	<DEL>	.	.	SVTYPE=DEL;STRANDS=+-:248;SVLEN=-4623;END=4414361;CIPOS=0,0;CIEND=0,0;CIPOS95=0,0;CIEND95=0,0;SU=248;PE=181;SR=67	GT:SU:PE:SR	./.:59:52:7	./.:0:0:0	./.:59:45:14	./.:130:84:46
unitig_3	4446657	4447348	-	-	DEL	-	691	1	0	0	1	0	TM1119_g9357		unitig_3	4446657	4447348	-	-	PM448_GAP	-	unitig_3	4446656	DEL00002577	C	<DEL>	.	PASS	PRECISE;SVTYPE=DEL;SVMETHOD=EMBL.DELLYv0.7.7;CHR2=unitig_3;END=4447349;PE=43;MAPQ=60;CT=3to5;CIPOS=-3,3;CIEND=-3,3;INSLEN=0;HOMLEN=2;SR=10;SRQ=0.994152;CONSENSUS=TGCATTAGTCACCGATCGAGATATTTAAGAGTTATTAAGCCATCAGTATAGTCTGGGAAGAGTTGCCTCTTCATTTGAACGTCCGCCTAGCTATAACAATTGTTAGCTTGAATAAAAGGACAAATATTGACAAAGCAACATAAAGCGCATACCTGATTACACACGCCACTT;CE=1.95625	GT:GL:GQ:FT:RCL:RC:RCR:CN:DR:DV:RR:RV	0/0:0,-7.22109,-87.7964:72:PASS:89:180:80:2:57:0:24:0	0/0:0,-6.01718,-71.2966:60:PASS:93:99:38:2:27:0:20:0	1/1:-145.193,-12.3348,0:123:PASS:130:0:69:0:0:44:0:41	0/0:0,-21.9664,-266.391:10000:PASS:132:380:235:2:103:0:73:0	unitig_3	4446655	1259	N	<DEL>	.	.	SVTYPE=DEL;STRANDS=+-:82;SVLEN=-693;END=4447348;CIPOS=0,0;CIEND=0,0;CIPOS95=0,1;CIEND95=0,0;IMPRECISE;SU=82;PE=47;SR=35	GT:SU:PE:SR	./.:0:0:0	./.:0:0:0	./.:82:47:35	./.:0:0:0
unitig_3	4496164	4497613	-	-	-	DEL	1449	0	1	0	1	0	TM1119_g9377		unitig_3	4496164	4497613	-	-	-	PM449_GAP	unitig_3	4496163	DEL00002581	G	<DEL>	.	PASS	PRECISE;SVTYPE=DEL;SVMETHOD=EMBL.DELLYv0.7.7;CHR2=unitig_3;END=4497614;PE=78;MAPQ=60;CT=3to5;CIPOS=-2,2;CIEND=-2,2;INSLEN=0;HOMLEN=2;SR=10;SRQ=0.97619;CONSENSUS=CTTCAAGTCTAGCTTACAATGCCGGCATGCTCATTTACCATCATTGGGCTCGGGTGCTATTCCTCATCGATGTATGAGTATGGCTTATTCTGAGGGAGAAAGAAGTAATATATTATAACAATAAGATACGAATTCACGACCTGCTTTCCCCTAGTTACAGTCGAGCCT;CE=1.981	GT:GL:GQ:FT:RCL:RC:RCR:CN:DR:DV:RR:RV	0/0:0,-3.00849,-35.7982:30:PASS:181:441:175:2:62:0:10:0	0/0:0,-1.20375,-14.8996:12:LowQual:77:523:109:6:1:1:4:0	0/0:0,-3.00936,-37.2991:30:PASS:129:593:157:4:37:0:10:0	1/1:-264.493,-21.3661,0:10000:PASS:403:6:371:0:0:79:0:71	unitig_3	4496163	1261	N	<DEL>	.	.	SVTYPE=DEL;STRANDS=+-:132;SVLEN=-1460;END=4497623;CIPOS=0,0;CIEND=0,0;CIPOS95=0,0;CIEND95=0,0;SU=132;PE=80;SR=52	GT:SU:PE:SR	./.:0:0:0	./.:1:1:0	./.:0:0:0	./.:131:79:52
unitig_3	4554668	4555972	DEL	-	DEL	DEL	1304	0	1	0	1	0	TM1119_g9401		unitig_3	4554668	4555972	PA7_GAP	-	PM448_GAP	PM449_GAP	unitig_3	4554668	DEL00002587	G	<DEL>	.	PASS	IMPRECISE;SVTYPE=DEL;SVMETHOD=EMBL.DELLYv0.7.7;CHR2=unitig_3;END=4555993;PE=48;MAPQ=60;CT=3to5;CIPOS=-50,50;CIEND=-50,50	GT:GL:GQ:FT:RCL:RC:RCR:CN:DR:DV:RR:RV	1/1:-213.298,-13.8452,0:138:PASS:176:1:205:0:0:46:0:0	0/0:0,-11.1346,-218.097:111:PASS:179:208:167:1:37:0:0:0	1/1:-270.799,-14.7493,0:147:PASS:139:0:192:0:0:49:0:0	1/1:-268.4,-13.8471,0:138:PASS:334:0:319:0:0:46:0:0	unitig_3	4554667	1263	N	<DEL>	.	.	SVTYPE=DEL;STRANDS=+-:157;SVLEN=-1305;END=4555972;CIPOS=-2,1;CIEND=-2,0;CIPOS95=0,0;CIEND95=0,0;SU=157;PE=142;SR=15	GT:SU:PE:SR	./.:47:47:0	./.:0:0:0	./.:53:49:4	./.:57:46:11
unitig_3	4556745	4557198	DEL	-	DEL	DEL	453	0	1	0	1	0	TM1119_g9402		unitig_3	4556745	4557198	PA7_GAP	-	PM448_GAP	PM449_GAP	unitig_3	4556739	DEL00002588	T	<DEL>	.	PASS	PRECISE;SVTYPE=DEL;SVMETHOD=EMBL.DELLYv0.7.7;CHR2=unitig_3;END=4557199;PE=22;MAPQ=60;CT=3to5;CIPOS=-6,6;CIEND=-6,6;INSLEN=0;HOMLEN=7;SR=10;SRQ=0.982659;CONSENSUS=AGTAGATCAATCTCCGCTTGCCTTAGGCTGTCGAGGTCTCCAGACTCCCACAGCTGACGCACTCTAGCAAATAGCTCATTCATGGCAGTTACAACGTGATGGGTATAGAATATGCTCCCTGTAAACACGGCATCTCCGCTACTGTGATCATGATAAGTGTAGCGAACAAAGAA;CE=1.99397	GT:GL:GQ:FT:RCL:RC:RCR:CN:DR:DV:RR:RV	1/1:-85.6974,-6.92112,0:69:PASS:5989:111:6636:0:0:54:0:23	0/0:0,-1.50372,-16.5986:15:PASS:11849:17639:4419:2:31:0:5:0	1/1:-89.3977,-7.22245,0:72:PASS:6263:99:4592:0:0:22:0:24	1/1:-214.692,-17.7532,0:10000:PASS:15305:195:16070:0:0:70:0:59	unitig_3	4556744	1264	N	<DEL>	.	.	SVTYPE=DEL;STRANDS=+-:179;SVLEN=-454;END=4557198;CIPOS=0,0;CIEND=0,0;CIPOS95=0,0;CIEND95=0,0;SU=179;PE=124;SR=55	GT:SU:PE:SR	./.:61:53:8	./.:0:0:0	./.:34:21:13	./.:84:50:34
unitig_3	4587395	4588077	DEL	-	-	-	682	0	0	1	1	0	TM1119_g9415		unitig_3	4587395	4588077	PA7_GAP	-	-	-	unitig_3	4587389	DEL00002589	T	<DEL>	.	PASS	PRECISE;SVTYPE=DEL;SVMETHOD=EMBL.DELLYv0.7.7;CHR2=unitig_3;END=4588078;PE=55;MAPQ=60;CT=3to5;CIPOS=-7,7;CIEND=-7,7;INSLEN=0;HOMLEN=6;SR=10;SRQ=1;CONSENSUS=GAAACGTGGATGTCATCACAGGAGACTGGCTTTCTGAGATGAACATAGCTTGGAAATTTTGCCCTCTGGTGAATCTTTCATTACCAAGCCCGCAGGCTGGTCCGGCACGGTCAA;CE=1.99889	GT:GL:GQ:FT:RCL:RC:RCR:CN:DR:DV:RR:RV	1/1:-51.5956,-4.51108,0:45:PASS:87:0:94:0:0:56:0:15	0/0:0,-6.92068,-82.097:69:PASS:76:124:54:2:28:0:23:0	0/0:0,-6.92057,-82.2969:69:PASS:46:113:71:2:28:0:23:0	0/0:0,-17.752,-209.491:10000:PASS:187:393:167:2:106:0:59:0	unitig_3	4587394	1265	N	<DEL>	.	.	SVTYPE=DEL;STRANDS=+-:65;SVLEN=-683;END=4588077;CIPOS=-3,2;CIEND=-10,9;CIPOS95=0,0;CIEND95=0,0;SU=65;PE=56;SR=9	GT:SU:PE:SR	./.:65:56:9	./.:0:0:0	./.:0:0:0	./.:0:0:0
unitig_3	4680245	4680869	DEL	-	-	-	624	0	0	0	0	0			unitig_3	4680245	4680869	PA7_GAP	-	-	-	unitig_3	4680243	DEL00002595	C	<DEL>	.	PASS	PRECISE;SVTYPE=DEL;SVMETHOD=EMBL.DELLYv0.7.7;CHR2=unitig_3;END=4680870;PE=46;MAPQ=60;CT=3to5;CIPOS=-3,3;CIEND=-3,3;INSLEN=0;HOMLEN=3;SR=10;SRQ=0.974359;CONSENSUS=CGCCACTGCCATCTGATCTCTTGGAAGACTTGCTTGCATGGCAATCAGGCCAGTCATGAATGTCGAACCTTCCGCCTGGACATATCTGTAGGTGAGAAATATACTTCTCGAGCTTGC;CE=1.99563	GT:GL:GQ:FT:RCL:RC:RCR:CN:DR:DV:RR:RV	1/1:-50.1975,-4.21193,0:42:PASS:91:0:93:0:0:46:0:14	0/0:0,-7.52269,-91.1969:75:PASS:60:116:55:2:31:0:25:0	0/0:0,-6.92129,-84.9976:69:PASS:56:105:32:2:16:0:23:0	0/0:0,-17.7533,-213.793:10000:PASS:159:381:181:2:119:0:59:0	unitig_3	4680244	1268	N	<DEL>	.	.	SVTYPE=DEL;STRANDS=+-:54;SVLEN=-625;END=4680869;CIPOS=-5,3;CIEND=-5,2;CIPOS95=0,0;CIEND95=0,0;SU=54;PE=47;SR=7	GT:SU:PE:SR	./.:54:47:7	./.:0:0:0	./.:0:0:0	./.:0:0:0
unitig_3	4786924	4788690	DEL	DEL	DEL	DEL	1766	0	0	0	0	0			unitig_3	4786924	4788690	PA7_GAP	PM1118_GAP	PM448_GAP	PM449_GAP	unitig_3	4786924	DEL00002600	G	<DEL>	.	PASS	IMPRECISE;SVTYPE=DEL;SVMETHOD=EMBL.DELLYv0.7.7;CHR2=unitig_3;END=4788671;PE=50;MAPQ=60;CT=3to5;CIPOS=-50,50;CIEND=-50,50	GT:GL:GQ:FT:RCL:RC:RCR:CN:DR:DV:RR:RV	1/1:-146.4,-7.82672,0:78:PASS:207:0:242:0:0:26:0:0	1/1:-147.899,-3.82877,0:38:PASS:264:4:250:0:1:28:0:0	1/1:-285.599,-15.0505,0:151:PASS:448:0:331:0:0:50:0:0	1/1:-277,-14.4489,0:144:PASS:366:0:495:0:0:48:0:0	unitig_3	4786923	1270	N	<DEL>	.	.	SVTYPE=DEL;STRANDS=+-:235;SVLEN=-1747;END=4788670;CIPOS=0,0;CIEND=0,0;CIPOS95=0,0;CIEND95=0,0;SU=235;PE=153;SR=82	GT:SU:PE:SR	./.:28:26:2	./.:45:29:16	./.:89:50:39	./.:73:48:25
unitig_3	4857666	4861222	DEL	-	DEL	DEL	3556	0	1	0	1	1	TM1119_g9503	TM1119_g9504	unitig_3	4857666	4861222	PA7_GAP	-	PM448_GAP	PM449_GAP	unitig_3	4857655	DEL00002613	T	<DEL>	.	PASS	PRECISE;SVTYPE=DEL;SVMETHOD=EMBL.DELLYv0.7.7;CHR2=unitig_3;END=4861219;PE=56;MAPQ=60;CT=3to5;CIPOS=-6,6;CIEND=-6,6;INSLEN=0;HOMLEN=5;SR=10;SRQ=0.950355;CONSENSUS=AAAGATTGCGTTCACTATCTCTCTTGCTGCAGCTGGATTGGCCGTCCTTTTCAGTCTAGGCACCAGCTTCCAAAAACTCATGTGTGATATTCCTTACGTCGCCATTCTTCTCAGCAGGAAACTCTCAGCATTATCAAAG;CE=1.97281	GT:GL:GQ:FT:RCL:RC:RCR:CN:DR:DV:RR:RV	1/1:-53.1965,-4.512,0:45:PASS:515:0:456:0:0:55:0:15	0/0:0,-4.21248,-50.2981:42:PASS:296:422:258:2:14:0:14:0	1/1:-32.6989,-2.70815,0:27:PASS:326:0:217:0:0:26:0:9	1/1:-248.092,-20.4625,0:10000:PASS:1009:4:929:0:0:98:0:68	unitig_3	4857656	1271	N	<DEL>	.	.	SVTYPE=DEL;STRANDS=+-:242;SVLEN=-3566;END=4861222;CIPOS=0,0;CIEND=0,0;CIPOS95=0,0;CIEND95=0,0;SU=242;PE=183;SR=59	GT:SU:PE:SR	./.:59:56:3	./.:0:0:0	./.:33:26:7	./.:150:101:49
unitig_3	4929145	4929270	DEL	-	DEL	DEL	125	0	0	0	0	0			unitig_3	4929145	4929270	PA7_GAP	-	PM448_GAP	PM449_GAP	unitig_3	4929142	DEL00002617	AAATTTGGATCTGTCATTGATGTTACTTATCTGAAATGAAGATGAGTAAACACCGAAGTTGTGATGTTGCCTGGAAGAAAACAGTGGCGGTGTGCTTCCACGTGATGTGGGGTGGTGAGCTTGTGTCTC	A	.	PASS	PRECISE;SVTYPE=DEL;SVMETHOD=EMBL.DELLYv0.7.7;CHR2=unitig_3;END=4929271;PE=0;MAPQ=60;CT=3to5;CIPOS=-3,3;CIEND=-3,3;INSLEN=0;HOMLEN=2;SR=10;SRQ=1;CONSENSUS=CTGTTCGATCTGAGTTTGCCGCATTGCTAAAGACATGGATGTAAACCCAGAAGAAAACCCTTCAGCGGCATCTTAGGGAGTTATCACTAAAACGAGCCTCTATATTCTTTCT;CE=1.98308	GT:GL:GQ:FT:RCL:RC:RCR:CN:DR:DV:RR:RV	1/1:-72.0942,-6.31581,0:63:PASS:1811:53:1618:0:0:0:0:21	0/0:0,-3.00842,-34.9981:30:PASS:988:2078:669:3:0:0:10:0	1/1:-46.6975,-3.91094,0:39:PASS:875:22:570:0:0:0:0:13	1/1:-240.083,-20.7542,0:10000:PASS:3975:120:3862:0:0:0:0:69	unitig_3	4929144	1274	N	<DEL>	.	.	SVTYPE=DEL;STRANDS=+-:68;SVLEN=-126;END=4929270;CIPOS=0,0;CIEND=0,0;CIPOS95=0,0;CIEND95=0,0;SU=68;PE=0;SR=68	GT:SU:PE:SR	./.:15:0:15	./.:0:0:0	./.:10:0:10	./.:43:0:43
unitig_3	4982380	4986980	-	-	-	DEL	4600	0	0	0	0	2		TM1119_g9543;TM1119_g9544	unitig_3	4982380	4986980	-	-	-	PM449_GAP	unitig_3	4982317	DEL00002620	G	<DEL>	.	PASS	PRECISE;SVTYPE=DEL;SVMETHOD=EMBL.DELLYv0.7.7;CHR2=unitig_3;END=4987020;PE=70;MAPQ=60;CT=3to5;CIPOS=-12,12;CIEND=-12,12;INSLEN=0;HOMLEN=20;SR=10;SRQ=0.957055;CONSENSUS=GAGGCGGACCTGCTTGGCTTGACAGAAAACCCTGTGGAAGATGTCAAAGTACTGCAAAACAAGGACATCATTCAGTGGGTCTGGAAAGGCGGGAAGATTTTCAAAGGTCCTGGTATCGGGCCATGGGGCGAAGATTGATTCAACCAGAACTCAGAGATCAATG;CE=1.96616	GT:GL:GQ:FT:RCL:RC:RCR:CN:DR:DV:RR:RV	0/0:0,-3.91087,-45.1975:39:PASS:612:1303:662:2:53:0:13:0	0/0:0,-6.01758,-70.997:60:PASS:877:980:212:2:30:0:20:0	0/0:0,-7.52276,-90.597:75:PASS:1282:1658:271:2:25:0:25:0	1/1:-176.757,-15.3099,0:154:PASS:1198:7:1295:0:13:74:0:51	unitig_3	4982354	1276	N	<DEL>	.	.	SVTYPE=DEL;STRANDS=+-:74;SVLEN=-4636;END=4986990;CIPOS=-10,310;CIEND=-151,2;CIPOS95=-1,30;CIEND95=-36,0;IMPRECISE;SU=74;PE=74;SR=0	GT:SU:PE:SR	./.:0:0:0	./.:0:0:0	./.:0:0:0	./.:74:74:0
unitig_3	4992109	5007551	-	-	DEL	DEL	15442	0	1	0	1	5	TM1119_g9546	TM1119_g9547;TM1119_g9548;TM1119_g9549;TM1119_g9550;TM1119_g9551	unitig_3	4992109	5007551	-	-	PM448_GAP	PM449_GAP	unitig_3	4992111	DEL00002623	G	<DEL>	.	PASS	PRECISE;SVTYPE=DEL;SVMETHOD=EMBL.DELLYv0.7.7;CHR2=unitig_3;END=5007552;PE=55;MAPQ=60;CT=3to5;CIPOS=-3,3;CIEND=-3,3;INSLEN=0;HOMLEN=3;SR=10;SRQ=0.989796;CONSENSUS=CTCCGTGTGGAATGTGTCATACCTAAACAAGAGAAAACATGGACCTTCATACGAACCCCAAAGCCGTGAGTTGTTACCTACCAAGCCCACTACCCCGGAAATTATTGCAATCTGTTTGGACCTGGGTTCCCACTCCCACACCCTCTAACTATTTCCATTTGATGACTCTGACACGACATCGTGCCTCAAAGTGC;CE=1.97255	GT:GL:GQ:FT:RCL:RC:RCR:CN:DR:DV:RR:RV	0/0:0,-5.11501,-60.8975:51:PASS:2129:4081:1946:2:70:0:17:0	0/0:0,-6.31846,-73.3968:63:PASS:1711:2799:2384:1:23:0:21:0	1/1:-136.496,-11.1337,0:111:PASS:2737:9:3039:0:0:54:0:37	1/1:-211.792,-17.753,0:10000:PASS:2625:6:3747:0:0:79:0:59	unitig_3	4992108	1277	N	<DEL>	.	.	SVTYPE=DEL;STRANDS=+-:208;SVLEN=-15443;END=5007551;CIPOS=0,0;CIEND=0,0;CIPOS95=0,0;CIEND95=0,0;SU=208;PE=135;SR=73	GT:SU:PE:SR	./.:0:0:0	./.:0:0:0	./.:80:55:25	./.:128:80:48
unitig_3	5011732	5011824	-	-	DEL	-	92	0	0	0	0	0			unitig_3	5011732	5011824	-	-	PM448_GAP	-	unitig_3	5011731	DEL00002625	TGTGTAAATAGTATACGATGTGAAAGACGGCCATTCCGCGAGCTCGTCTTGGGCTATTAATATTTCACCTGGTGGTCATCAACGCGACCAATTA	T	.	PASS	PRECISE;SVTYPE=DEL;SVMETHOD=EMBL.DELLYv0.7.7;CHR2=unitig_3;END=5011825;PE=0;MAPQ=60;CT=3to5;CIPOS=-2,2;CIEND=-2,2;INSLEN=0;HOMLEN=2;SR=10;SRQ=0.982659;CONSENSUS=AGGCGACATGAATGCCACCGAGGTGGTCACGGTGCCGCCCGTGTCTGTGACCAAGGACTTTGTATAAAGGGCAGAATTAGATCTTCACTTTCGACTCAATGATCACCAAGCATACTTATGAATATGATTTTTTTCGTTTCTAGGGAATTCGTACATAAGACATAAAAAGAAG;CE=1.98096	GT:GL:GQ:FT:RCL:RC:RCR:CN:DR:DV:RR:RV	0/0:0,-6.31861,-75.397:63:PASS:1026:2993:1574:2:0:0:21:0	0/0:0,-10.8328,-129.996:108:PASS:2734:4435:1551:2:0:0:36:0	1/1:-198.691,-13.6508,0:137:PASS:2599:75:1262:0:0:0:1:57	0/0:0,-16.85,-202.792:10000:PASS:2667:6648:3307:2:0:0:56:0	unitig_3	5011731	1279	N	<DEL>	.	.	SVTYPE=DEL;STRANDS=+-:48;SVLEN=-93;END=5011824;CIPOS=0,0;CIEND=0,0;CIPOS95=0,0;CIEND95=0,0;SU=48;PE=0;SR=48	GT:SU:PE:SR	./.:0:0:0	./.:0:0:0	./.:48:0:48	./.:0:0:0
unitig_3	5060316	5068690	DEL	-	-	-	8374	0	0	0	0	3		TM1119_g9569;TM1119_g9570;TM1119_g9571	unitig_3	5060316	5068690	PA7_GAP	-	-	-	unitig_3	5060317	DEL00002626	T	<DEL>	.	PASS	IMPRECISE;SVTYPE=DEL;SVMETHOD=EMBL.DELLYv0.7.7;CHR2=unitig_3;END=5068685;PE=31;MAPQ=54;CT=3to5;CIPOS=-50,50;CIEND=-50,50	GT:GL:GQ:FT:RCL:RC:RCR:CN:DR:DV:RR:RV	1/1:-158.699,-9.33087,0:93:PASS:1055:0:1021:0:0:31:0:0	0/0:0,-9.63295,-192:96:PASS:568:1614:990:2:32:0:0:0	0/0:0,-5.41853,-108:54:PASS:758:2399:1315:2:18:0:0:0	0/0:0,-40.3379,-797.7:10000:PASS:2361:4389:2319:2:134:0:0:0	unitig_3	5060315	1282	N	<DEL>	.	.	SVTYPE=DEL;STRANDS=+-:32;SVLEN=-8369;END=5068684;CIPOS=-10,155;CIEND=-150,9;CIPOS95=-1,33;CIEND95=-34,2;IMPRECISE;SU=32;PE=32;SR=0	GT:SU:PE:SR	./.:32:32:0	./.:0:0:0	./.:0:0:0	./.:0:0:0
unitig_3	5111797	5112550	-	-	DEL	DEL	753	0	0	0	0	0			unitig_3	5111797	5112550	-	-	PM448_GAP	PM449_GAP	unitig_3	5111792	DEL00002631	C	<DEL>	.	PASS	IMPRECISE;SVTYPE=DEL;SVMETHOD=EMBL.DELLYv0.7.7;CHR2=unitig_3;END=5112551;PE=19;MAPQ=60;CT=3to5;CIPOS=-50,50;CIEND=-50,50	GT:GL:GQ:FT:RCL:RC:RCR:CN:DR:DV:RR:RV	0/0:0,-19.2646,-368.299:10000:PASS:92:208:109:2:64:0:0:0	0/0:0,-8.1278,-162:81:PASS:52:108:68:2:27:0:0:0	1/1:-113,-5.71956,0:57:PASS:64:0:57:0:0:19:0:0	1/1:-558.8,-28.2967,0:10000:PASS:222:2:253:0:0:94:0:0	unitig_3	5111791	1285	N	<DEL>	.	.	SVTYPE=DEL;STRANDS=+-:165;SVLEN=-759;END=5112550;CIPOS=0,0;CIEND=0,0;CIPOS95=0,0;CIEND95=0,0;SU=165;PE=115;SR=50	GT:SU:PE:SR	./.:0:0:0	./.:1:0:1	./.:27:19:8	./.:137:96:41
unitig_3	5172678	5173271	DEL	-	-	-	593	0	0	1	1	0	TM1119_g9616		unitig_3	5172678	5173271	PA7_GAP	-	-	-	unitig_3	5172674	DEL00002636	G	<DEL>	.	PASS	PRECISE;SVTYPE=DEL;SVMETHOD=EMBL.DELLYv0.7.7;CHR2=unitig_3;END=5173272;PE=40;MAPQ=60;CT=3to5;CIPOS=-4,4;CIEND=-4,4;INSLEN=0;HOMLEN=3;SR=10;SRQ=1;CONSENSUS=GATATACACTATTAATCTCTAATTAACGATGCATTTGTTAGGAAAGCCACGAACATGTAATCTACTACACACGTTTGAAGGATAGCACTCACCCTCTCTCATG;CE=1.94065	GT:GL:GQ:FT:RCL:RC:RCR:CN:DR:DV:RR:RV	1/1:-66.1978,-5.41638,0:54:PASS:71:0:69:0:0:40:0:18	0/0:0,-4.81386,-57.5974:48:PASS:58:86:40:2:24:0:16:0	0/0:0,-7.22111,-85.9964:72:PASS:73:123:30:2:26:0:24:0	0/0:0,-21.9658,-266.691:10000:PASS:179:363:177:2:112:0:73:0	unitig_3	5172677	1286	N	<DEL>	.	.	SVTYPE=DEL;STRANDS=+-:50;SVLEN=-594;END=5173271;CIPOS=-3,1;CIEND=-10,9;CIPOS95=0,0;CIEND95=0,0;SU=50;PE=38;SR=12	GT:SU:PE:SR	./.:50:38:12	./.:0:0:0	./.:0:0:0	./.:0:0:0
unitig_3	5173686	5175643	DEL	-	DEL	DEL	1957	1	0	0	1	0	TM1119_g9617		unitig_3	5173686	5175643	PA7_GAP	-	PM448_GAP	PM449_GAP	unitig_3	5173686	DEL00002638	A	<DEL>	.	PASS	IMPRECISE;SVTYPE=DEL;SVMETHOD=EMBL.DELLYv0.7.7;CHR2=unitig_3;END=5175736;PE=23;MAPQ=60;CT=3to5;CIPOS=-162,162;CIEND=-162,162	GT:GL:GQ:FT:RCL:RC:RCR:CN:DR:DV:RR:RV	1/1:-276.2,-14.449,0:144:PASS:98:27:293:0:0:48:0:0	0/0:0,-7.82674,-154.2:78:PASS:138:313:138:2:26:0:0:0	1/1:-138,-6.92368,0:69:PASS:175:5:223:0:0:23:0:0	1/1:-527.9,-26.4906,0:10000:PASS:599:60:562:0:0:88:0:0	unitig_3	5173685	1288	N	<DEL>	.	.	SVTYPE=DEL;STRANDS=+-:219;SVLEN=-1958;END=5175643;CIPOS=0,0;CIEND=0,0;CIPOS95=0,0;CIEND95=0,0;SU=219;PE=166;SR=53	GT:SU:PE:SR	./.:58:49:9	./.:0:0:0	./.:30:23:7	./.:131:94:37
unitig_3	5192238	5192407	DEL	-	DEL	DEL	169	0	0	0	0	0			unitig_3	5192238	5192407	PA7_GAP	-	PM448_GAP	PM449_GAP	unitig_3	5192231	DEL00002639	GCCATTTATGACAATCGGGTGGGGTTATTCCGGCACCGGTAGCACTATATATATAGCACTCTGTAGGTAGCCTACAAGGCTCACATCTTAGAGACCTACATACTACTGCTTTACACCCTACTACTACCTACAAAGGGAGCTCCACGCTACGTAGCCTATGAGATCCGTCACA	G	.	PASS	PRECISE;SVTYPE=DEL;SVMETHOD=EMBL.DELLYv0.7.7;CHR2=unitig_3;END=5192403;PE=0;MAPQ=60;CT=3to5;CIPOS=-8,8;CIEND=-8,8;INSLEN=0;HOMLEN=8;SR=10;SRQ=0.980952;CONSENSUS=GATCCGGGCTTTCCTGAAATCCAGAAATATCCATTTTCTTCTTTTAGCCATTTTACTAGGTTATTTGAAGTATTTGCTGTTTTCTTGTCGCGGAACGCCCATTGA;CE=1.91993	GT:GL:GQ:FT:RCL:RC:RCR:CN:DR:DV:RR:RV	1/1:-81.4975,-6.62014,0:66:PASS:2388:365:2133:0:0:0:0:22	0/0:0,-3.30989,-39.2986:33:PASS:986:2186:1631:2:0:0:11:0	1/1:-25.1991,-2.10636,0:21:PASS:987:51:414:0:0:0:0:7	1/1:-226.693,-18.657,0:10000:PASS:6170:282:6476:0:0:0:0:62	unitig_3	5192237	1289	N	<DEL>	.	.	SVTYPE=DEL;STRANDS=+-:67;SVLEN=-165;END=5192402;CIPOS=0,0;CIEND=0,0;CIPOS95=0,0;CIEND95=0,0;SU=67;PE=0;SR=67	GT:SU:PE:SR	./.:18:0:18	./.:0:0:0	./.:6:0:6	./.:43:0:43
unitig_3	5194074	5194158	DEL	-	-	-	84	0	0	0	0	0			unitig_3	5194074	5194158	PA7_GAP	-	-	-	unitig_3	5194071	DEL00002641	AATAGACAACTACGGCATACCGGTAGCTTGCAGCACAGCTGAGTCGACTTTCATGTTAGTCTATGTTGTATCAAAAATGCTGTGAACC	A	.	PASS	PRECISE;SVTYPE=DEL;SVMETHOD=EMBL.DELLYv0.7.7;CHR2=unitig_3;END=5194159;PE=0;MAPQ=60;CT=3to5;CIPOS=-3,3;CIEND=-3,3;INSLEN=0;HOMLEN=2;SR=10;SRQ=0.990476;CONSENSUS=AGCCTCGCCAGCGAGCCACAGCCCAACCTTGACACTCAACGTCGCTGTCACGAAATGTCGTTATACTCAATGCTCAACTCCTACGAGGACAGGGAGGATGTCCTT;CE=1.97485	GT:GL:GQ:FT:RCL:RC:RCR:CN:DR:DV:RR:RV	1/1:-63.0963,-5.41488,0:54:PASS:1031:48:812:0:0:0:0:18	0/0:0,-7.22087,-85.7962:72:PASS:1933:2384:1010:2:0:0:24:0	0/0:0,-12.3358,-147.694:123:PASS:2984:4079:1368:2:0:0:41:0	0/0:0,-18.9569,-229.292:10000:PASS:3055:6626:3784:2:0:0:63:0	unitig_3	5194073	1290	N	<DEL>	.	.	SVTYPE=DEL;STRANDS=+-:8;SVLEN=-85;END=5194158;CIPOS=-10,9;CIEND=-10,9;CIPOS95=0,0;CIEND95=0,0;SU=8;PE=0;SR=8	GT:SU:PE:SR	./.:8:0:8	./.:0:0:0	./.:0:0:0	./.:0:0:0
unitig_3	5255505	5255610	-	-	DEL	-	105	0	0	0	0	0			unitig_3	5255505	5255610	PA7_GAP	-	PM448_GAP	-	unitig_3	5255503	DEL00002644	GCGCACGCGTCGAAACAGCTGCTTGCCGAGCTTGTTTGTTCTTTCTCTTCCCATTACTTTTCATAGACTCCTTTCGTCTGATGAGGTAAGTGCGATGGGCAGCCGACC	G	.	PASS	PRECISE;SVTYPE=DEL;SVMETHOD=EMBL.DELLYv0.7.7;CHR2=unitig_3;END=5255611;PE=0;MAPQ=60;CT=3to5;CIPOS=-3,3;CIEND=-3,3;INSLEN=0;HOMLEN=2;SR=10;SRQ=0.976923;CONSENSUS=GAACCTCCGTGTCCCGACTTCTTAGATGACATAATGTCAGGCATGTACGAAACCTGGAATGGAAGGCACCTAACTTACCTAAGCCAACCTGCACCAACGTTTCACTGGATTTGGACCAATATATATGAGG;CE=1.98731	GT:GL:GQ:FT:RCL:RC:RCR:CN:DR:DV:RR:RV	1/1:-71.795,-6.01562,0:60:PASS:1488:32:875:0:0:0:0:20	0/0:0,-6.31805,-76.3964:63:PASS:732:2700:2154:2:0:0:21:0	1/1:-61.4971,-5.11459,0:51:PASS:754:25:869:0:0:0:0:17	0/0:0,-18.3533,-218.59:10000:PASS:4525:7311:3443:2:0:0:61:0	unitig_3	5255504	1291	N	<DEL>	.	.	SVTYPE=DEL;STRANDS=+-:9;SVLEN=-106;END=5255610;CIPOS=-4,3;CIEND=-4,3;CIPOS95=0,0;CIEND95=0,0;SU=9;PE=0;SR=9	GT:SU:PE:SR	./.:3:0:3	./.:0:0:0	./.:6:0:6	./.:0:0:0
unitig_3	5474230	5475211	-	DEL	DEL	-	981	0	0	0	0	0			unitig_3	5474230	5475211	-	PM1118_GAP	PM448_GAP	-	unitig_3	5474229	DEL00002664	A	<DEL>	.	PASS	PRECISE;SVTYPE=DEL;SVMETHOD=EMBL.DELLYv0.7.7;CHR2=unitig_3;END=5475212;PE=44;MAPQ=60;CT=3to5;CIPOS=-2,2;CIEND=-2,2;INSLEN=0;HOMLEN=1;SR=10;SRQ=1;CONSENSUS=GTCGAATTTGAATGACTGCTTGCTAAATAGAGCAAAATTTGAAACTTACAACTCGCTATTGCGGCATTCAAAACAGTAAACACAACTGAAGAGCTTACGTTCACCGAGGAAGCTGGTAATGAACTATAGGACGGGTAGTTGCATCAAGAGGCATCGTTAGCGCGGCGTGATCGGGCACTCTCGCACTACG;CE=1.98441	GT:GL:GQ:FT:RCL:RC:RCR:CN:DR:DV:RR:RV	0/0:0,-5.71536,-66.2958:57:PASS:135:260:122:2:36:0:19:0	1/1:-97.6965,-5.02626,0:50:PASS:87:2:240:0:0:44:1:28	1/1:-225.592,-18.9567,0:10000:PASS:180:0:321:0:0:86:0:63	0/0:0,-16.8511,-204.193:10000:PASS:274:562:227:2:76:0:56:0	unitig_3	5474229	1294	N	<DEL>	.	.	SVTYPE=DEL;STRANDS=+-:193;SVLEN=-982;END=5475211;CIPOS=0,0;CIEND=0,0;CIPOS95=0,0;CIEND95=0,0;SU=193;PE=132;SR=61	GT:SU:PE:SR	./.:0:0:0	./.:60:44:16	./.:133:88:45	./.:0:0:0
unitig_30	8916	10427	DEL	-	-	DEL	1511	0	1	0	1	0	TM1119_g6246		unitig_30	8916	10427	PA7_GAP	-	-	PM449_GAP	unitig_30	8913	DEL00001835	C	<DEL>	.	PASS	PRECISE;SVTYPE=DEL;SVMETHOD=EMBL.DELLYv0.7.7;CHR2=unitig_30;END=10428;PE=69;MAPQ=60;CT=3to5;CIPOS=-3,3;CIEND=-3,3;INSLEN=0;HOMLEN=2;SR=10;SRQ=1;CONSENSUS=AAATGCAGGGATTGATGAGCCGATAGCTGCGTATACCATATACCGCAAAACATCAGCGCTCGGCCGCTCGCCAGTCAGCAGAACTTCATCTTACTAGACAATCATAATGA;CE=1.9769	GT:GL:GQ:FT:RCL:RC:RCR:CN:DR:DV:RR:RV	1/1:-67.4959,-5.71543,0:57:PASS:243:0:242:0:0:69:0:19	0/0:0,-7.22192,-87.6972:72:PASS:77:483:164:4:26:0:24:0	0/0:0,-3.31,-39.5987:33:PASS:34:581:295:4:32:0:11:0	1/1:-294.288,-24.9735,0:10000:PASS:443:3:421:0:0:86:0:83	unitig_30	8915	953	N	<DEL>	.	.	SVTYPE=DEL;STRANDS=+-:226;SVLEN=-1512;END=10427;CIPOS=0,0;CIEND=0,0;CIPOS95=0,0;CIEND95=0,0;SU=226;PE=155;SR=71	GT:SU:PE:SR	./.:78:69:9	./.:0:0:0	./.:0:0:0	./.:148:86:62
unitig_30	124025	124458	-	DEL	-	-	433	0	0	0	0	0			unitig_30	124025	124458	-	PM1118_GAP	-	-	unitig_30	124022	DEL00001841	G	<DEL>	.	PASS	PRECISE;SVTYPE=DEL;SVMETHOD=EMBL.DELLYv0.7.7;CHR2=unitig_30;END=124459;PE=54;MAPQ=60;CT=3to5;CIPOS=-3,3;CIEND=-3,3;INSLEN=0;HOMLEN=2;SR=10;SRQ=0.9875;CONSENSUS=GTTTATGGCAACTCCTGGCATGCCATTGCGCAGGTCTTGTCTCCAGATACACGGCACCTACTTGATCGAGTGCATTGGTGGTGTTTCTTCTTGGTTCTCTACAGTTAGATTTACATGTGTTTCATGCATCACATTCCCGGGCCTCCCACCTCGGCATTCT;CE=1.95389	GT:GL:GQ:FT:RCL:RC:RCR:CN:DR:DV:RR:RV	0/0:0,-6.01773,-72.5971:60:PASS:5233:10794:5929:2:51:0:20:0	1/1:-82.497,-6.92065,0:69:PASS:8241:36:9870:0:0:54:0:23	0/0:0,-9.32801,-113.096:93:PASS:3716:15596:14091:2:23:0:31:0	0/0:0,-17.7544,-217.594:10000:PASS:16155:31038:14283:2:85:0:59:0	unitig_30	124024	955	N	<DEL>	.	.	SVTYPE=DEL;STRANDS=+-:34;SVLEN=-434;END=124458;CIPOS=-10,9;CIEND=-10,9;CIPOS95=0,0;CIEND95=0,0;SU=34;PE=13;SR=21	GT:SU:PE:SR	./.:0:0:0	./.:34:13:21	./.:0:0:0	./.:0:0:0
unitig_30	191773	199305	DEL	DEL	DEL	-	7532	1	0	0	1	1	TM1119_g6304	TM1119_g6303	unitig_30	191773	199305	PA7_GAP	PM1118_GAP	PM448_GAP	-	unitig_30	191904	DEL00001848	G	<DEL>	.	PASS	IMPRECISE;SVTYPE=DEL;SVMETHOD=EMBL.DELLYv0.7.7;CHR2=unitig_30;END=199184;PE=79;MAPQ=60;CT=3to5;CIPOS=-50,50;CIEND=-50,50	GT:GL:GQ:FT:RCL:RC:RCR:CN:DR:DV:RR:RV	1/1:-251,-12.6432,0:126:PASS:879:24:1013:0:0:42:0:0	1/1:-100.1,-5.11747,0:51:PASS:442:9:619:0:0:17:0:0	1/1:-120,-6.02059,0:60:PASS:455:0:905:0:0:20:0:0	1/1:-497.904,-11.7935,0:118:PASS:2046:3:1974:0:4:87:0:0	unitig_30	191772	956	N	<DEL>	.	.	SVTYPE=DEL;STRANDS=+-:48;SVLEN=-7533;END=199305;CIPOS=0,0;CIEND=0,0;CIPOS95=0,0;CIEND95=0,0;SU=48;PE=0;SR=48	GT:SU:PE:SR	./.:10:0:10	./.:22:0:22	./.:16:0:16	./.:0:0:0
unitig_30	191932	199143	-	-	-	DEL	7211	0	0	0	0	1		TM1119_g6303	unitig_30	191932	199143	-	-	-	PM449_GAP	unitig_30	191904	DEL00001848	G	<DEL>	.	PASS	IMPRECISE;SVTYPE=DEL;SVMETHOD=EMBL.DELLYv0.7.7;CHR2=unitig_30;END=199184;PE=79;MAPQ=60;CT=3to5;CIPOS=-50,50;CIEND=-50,50	GT:GL:GQ:FT:RCL:RC:RCR:CN:DR:DV:RR:RV	1/1:-251,-12.6432,0:126:PASS:879:24:1013:0:0:42:0:0	1/1:-100.1,-5.11747,0:51:PASS:442:9:619:0:0:17:0:0	1/1:-120,-6.02059,0:60:PASS:455:0:905:0:0:20:0:0	1/1:-497.904,-11.7935,0:118:PASS:2046:3:1974:0:4:87:0:0	unitig_30	191902	957	N	<DEL>	.	.	SVTYPE=DEL;STRANDS=+-:68;SVLEN=-7274;END=199176;CIPOS=-10,148;CIEND=-145,9;CIPOS95=-2,43;CIEND95=-47,2;IMPRECISE;SU=68;PE=68;SR=0	GT:SU:PE:SR	./.:0:0:0	./.:1:1:0	./.:0:0:0	./.:67:67:0
unitig_30	469972	470116	-	-	DEL	-	144	0	0	0	0	0			unitig_30	469972	470116	-	-	PM448_GAP	-	unitig_30	469968	DEL00001871	A	<DEL>	.	PASS	PRECISE;SVTYPE=DEL;SVMETHOD=EMBL.DELLYv0.7.7;CHR2=unitig_30;END=470117;PE=4;MAPQ=60;CT=3to5;CIPOS=-4,4;CIEND=-4,4;INSLEN=0;HOMLEN=4;SR=10;SRQ=0.994924;CONSENSUS=GGGTGCGCCAACTCTCGGCGAAGATGTTTCGAGAACTGTAGATTACGGTAATAGTAGCCCAGCCACGAAATTCCGCCGTAAGTCCATGTAAATGCTTCAAATAAACGAGGCTTTCAGTCATCGGGCTAGCCCACCCAATCACTATCATATCGTTTACTCGCAGCTCGTAAATAAGGGAGGCTTGCCTTGTCACCATC;CE=1.99618	GT:GL:GQ:FT:RCL:RC:RCR:CN:DR:DV:RR:RV	0/0:0,-4.81331,-57.6968:48:PASS:1555:4115:2120:2:38:0:16:0	0/0:0,-5.41672,-66.6982:54:PASS:1411:2765:2038:2:16:0:18:0	1/1:-105.596,-8.72606,0:87:PASS:1040:52:2964:0:1:4:0:29	0/0:0,-21.0613,-250.489:10000:PASS:5754:13531:6343:2:78:0:70:0	unitig_30	469971	958	N	<DEL>	.	.	SVTYPE=DEL;STRANDS=+-:24;SVLEN=-145;END=470116;CIPOS=-1,0;CIEND=-1,0;CIPOS95=0,0;CIEND95=0,0;SU=24;PE=0;SR=24	GT:SU:PE:SR	./.:0:0:0	./.:0:0:0	./.:23:0:23	./.:0:0:0
unitig_30	646543	647619	-	-	DEL	-	1076	1	0	0	1	0	TM1119_g6468		unitig_30	646543	647619	-	-	PM448_GAP	-	unitig_30	646497	DEL00001885	T	<DEL>	.	PASS	IMPRECISE;SVTYPE=DEL;SVMETHOD=EMBL.DELLYv0.7.7;CHR2=unitig_30;END=647620;PE=47;MAPQ=60;CT=3to5;CIPOS=-92,92;CIEND=-92,92	GT:GL:GQ:FT:RCL:RC:RCR:CN:DR:DV:RR:RV	0/0:0,-15.0469,-274.895:150:PASS:134:261:124:2:50:0:0:0	0/0:0,-10.536,-208.3:105:PASS:100:223:120:2:35:0:0:0	1/1:-276.9,-14.1479,0:141:PASS:120:2:156:0:0:47:0:0	0/0:0,-28.5923,-561.794:10000:PASS:293:544:281:2:95:0:0:0	unitig_30	646495	960	N	<DEL>	.	.	SVTYPE=DEL;STRANDS=+-:47;SVLEN=-1124;END=647619;CIPOS=-8,318;CIEND=-357,9;CIPOS95=-2,164;CIEND95=-126,2;IMPRECISE;SU=47;PE=47;SR=0	GT:SU:PE:SR	./.:0:0:0	./.:0:0:0	./.:47:47:0	./.:0:0:0
unitig_30	719301	720407	-	-	DEL	DEL	1106	0	0	0	0	0			unitig_30	719301	720407	-	-	PM448_GAP	PM449_GAP	unitig_30	719296	DEL00001893	C	<DEL>	.	PASS	PRECISE;SVTYPE=DEL;SVMETHOD=EMBL.DELLYv0.7.7;CHR2=unitig_30;END=720408;PE=32;MAPQ=60;CT=3to5;CIPOS=-6,6;CIEND=-6,6;INSLEN=0;HOMLEN=6;SR=10;SRQ=0.99422;CONSENSUS=TCTTAACGTCATAGTGCACTTGCTGCGATGGCTCGTGCTCGTTTCACCGGTATTGCTGCTAAATGCGGTGATGTCTTTGGCTCGGCCACAGGTAGCGTTGCGATTCTGCAGCTGTTGAGACTGTGTACAATCGGTTAAACAGCAACGTACGGGCAATAGTGTAGCTTATGCCT;CE=1.98026	GT:GL:GQ:FT:RCL:RC:RCR:CN:DR:DV:RR:RV	0/0:0,-1.80576,-22.9996:18:PASS:135:138:0:2:0:0:6:0	0/0:0,-3.61106,-43.8987:36:PASS:103:68:4:1:0:0:12:0	1/1:-119.596,-9.92974,0:99:PASS:168:11:77:0:0:31:0:33	1/1:-191.893,-15.9478,0:157:PASS:299:7:287:0:0:80:0:53	unitig_30	719300	961	N	<DEL>	.	.	SVTYPE=DEL;STRANDS=+-:178;SVLEN=-1107;END=720407;CIPOS=0,0;CIEND=0,0;CIPOS95=0,0;CIEND95=0,0;SU=178;PE=114;SR=64	GT:SU:PE:SR	./.:0:0:0	./.:0:0:0	./.:61:33:28	./.:117:81:36
unitig_30	719622	726340	DEL	-	-	-	6718	0	0	0	0	1		TM1119_g6492	unitig_30	719622	726340	PA7_GAP		-	-	unitig_30	719616	DEL00001894	T	<DEL>	.	PASS	PRECISE;SVTYPE=DEL;SVMETHOD=EMBL.DELLYv0.7.7;CHR2=unitig_30;END=726341;PE=55;MAPQ=60;CT=3to5;CIPOS=-7,7;CIEND=-7,7;INSLEN=0;HOMLEN=7;SR=10;SRQ=1;CONSENSUS=GATGAGTTGAGCCATCAGGCTCCAGAATTCTCCTTGATCCGCCCACATCAAATACCATTCCAACGGGCCTAAATTTTCGGCACGTCAATGACGGAAAACGAGATATTTCG;CE=1.98567	GT:GL:GQ:FT:RCL:RC:RCR:CN:DR:DV:RR:RV	1/1:-64.6974,-5.41593,0:54:PASS:820:52:853:0:0:55:0:18	1/1:-65.398,-5.41653,0:54:PASS:532:29:393:0:0:18:0:18	0/0:0,-3.00955,-38.0992:30:PASS:707:1361:331:3:0:0:10:0	0/0:0,-10.832,-128.495:108:PASS:1759:3171:1984:2:0:0:36:0	unitig_30	719621	963	N	<DEL>	.	.	SVTYPE=DEL;STRANDS=+-:97;SVLEN=-6718;END=726339;CIPOS=-2,0;CIEND=0,0;CIPOS95=0,0;CIEND95=0,1;IMPRECISE;SU=97;PE=73;SR=24	GT:SU:PE:SR	./.:65:55:10	./.:32:18:14	./.:0:0:0	./.:0:0:0
unitig_30	776222	776620	DEL	-	-	-	398	1	0	0	1	0	TM1119_g6513		unitig_30	776222	776620	PA7_GAP	-	-	-	unitig_30	776219	DEL00001897	T	<DEL>	.	PASS	PRECISE;SVTYPE=DEL;SVMETHOD=EMBL.DELLYv0.7.7;CHR2=unitig_30;END=776621;PE=43;MAPQ=60;CT=3to5;CIPOS=-3,3;CIEND=-3,3;INSLEN=0;HOMLEN=2;SR=10;SRQ=0.952381;CONSENSUS=CGTATCTTAATTTTCTCGCATAGACATAAGATGAGATCCAAAATAATATGTATAAAAAACTTCTCCAGCTGAAGAAGGATTCATGCAATCGAAACGTTCAGGCAG;CE=1.92137	GT:GL:GQ:FT:RCL:RC:RCR:CN:DR:DV:RR:RV	1/1:-38.597,-3.30836,0:33:PASS:5086:29:2855:0:0:42:0:11	0/0:0,-3.30874,-36.9974:33:PASS:3973:5516:2931:2:17:0:11:0	0/0:0,-2.40716,-28.0989:24:PASS:2864:4185:5280:1:10:0:8:0	0/0:0,-16.2496,-197.994:10000:PASS:15307:29966:14549:2:83:0:54:0	unitig_30	776221	964	N	<DEL>	.	.	SVTYPE=DEL;STRANDS=+-:46;SVLEN=-399;END=776620;CIPOS=-5,4;CIEND=-10,9;CIPOS95=0,0;CIEND95=0,0;SU=46;PE=40;SR=6	GT:SU:PE:SR	./.:46:40:6	./.:0:0:0	./.:0:0:0	./.:0:0:0
unitig_30	817418	817620	DEL	DEL	DEL	DEL	202	0	0	0	0	0			unitig_30	817418	817620	PA7_GAP	PM1118_GAP	PM448_GAP	PM449_GAP	unitig_30	817412	DEL00001900	TACCCCTGTTGTGGGAATGGATGGCTTACATAAGGCTGCCGCTAGCTCATACTTAGCTCACCTTCCCTCACACTTACATAGCTTTCGCTAGAACAACCAATATATCACGAATGCACAGCACAGCAAATTGAAGCCTACGTACAGCGTAGCCGGTACCAGTCCGTGAGCCCATATCATACCTTACGTCCGTCCCGGACGTAGGCCTTACA	T	.	PASS	PRECISE;SVTYPE=DEL;SVMETHOD=EMBL.DELLYv0.7.7;CHR2=unitig_30;END=817621;PE=0;MAPQ=60;CT=3to5;CIPOS=-7,7;CIEND=-7,7;INSLEN=0;HOMLEN=7;SR=10;SRQ=1;CONSENSUS=AGCGAATCAAAATCCTGTGGCTACTACTCATTACGACGAAAAGAAGACTGCTACCCCCTTACGCGTGTAAGTCTCGGATCTGAGTGCTCAGACAGAGCACAGCTAAATTGGCAGCCACTG;CE=1.98526	GT:GL:GQ:FT:RCL:RC:RCR:CN:DR:DV:RR:RV	1/1:-34.0977,-3.00804,0:30:PASS:2288:42:2053:0:0:0:0:10	1/1:-62.6969,-5.41548,0:54:PASS:1467:60:2681:0:0:0:0:18	1/1:-42.1982,-3.61052,0:36:PASS:1653:64:3548:0:0:0:0:12	1/1:-226.492,-18.9571,0:10000:PASS:7256:225:6391:0:0:0:0:63	unitig_30	817417	965	N	<DEL>	.	.	SVTYPE=DEL;STRANDS=+-:80;SVLEN=-203;END=817620;CIPOS=0,0;CIEND=0,0;CIPOS95=0,0;CIEND95=0,0;SU=80;PE=0;SR=80	GT:SU:PE:SR	./.:8:0:8	./.:15:0:15	./.:8:0:8	./.:49:0:49
unitig_30	916955	917006	-	DEL	-	-	51	0	0	0	0	0			unitig_30	916955	917006	-	PM1118_GAP	-	-	unitig_30	916952	DEL00001907	CAGCGGGAACGCCTACCGAGGTCCCCTAGCGTGGCGTGCAAGGTGCAAGGTGCAG	C	.	PASS	PRECISE;SVTYPE=DEL;SVMETHOD=EMBL.DELLYv0.7.7;CHR2=unitig_30;END=917007;PE=0;MAPQ=60;CT=3to5;CIPOS=-4,4;CIEND=-4,4;INSLEN=0;HOMLEN=3;SR=10;SRQ=0.984536;CONSENSUS=CAGGGGTGTATCTTGGCTTCTAGGGAGCATGGGAGGTGTATTTACAGGGGCAGCATGGTACCTAGGTACCTGTACAGCCGGGTGGGGGTCGCCAGGGCCCTCAGAACAACAACGCTTCCTATGCTCAGCATTATTAGGGAGCCGATACTCCATCCGCTCGTGTGCAATTACAGCAATTCGCGTTGAGACAAGAT;CE=1.98905	GT:GL:GQ:FT:RCL:RC:RCR:CN:DR:DV:RR:RV	0/0:0,-3.30758,-35.7962:33:PASS:380:848:476:2:0:0:11:0	1/1:-201.693,-16.8504,0:10000:PASS:854:76:1066:0:0:0:0:56	0/0:0,-28.884,-335.385:10000:PASS:3565:6556:2859:2:0:0:96:0	0/0:0,-15.6447,-184.191:157:PASS:1725:3696:1834:2:0:0:52:0	unitig_30	916954	968	N	<DEL>	.	.	SVTYPE=DEL;STRANDS=+-:31;SVLEN=-52;END=917006;CIPOS=-1,0;CIEND=-1,0;CIPOS95=0,0;CIEND95=0,0;SU=31;PE=0;SR=31	GT:SU:PE:SR	./.:0:0:0	./.:31:0:31	./.:0:0:0	./.:0:0:0
unitig_30	1013174	1016248	DEL	DEL	DEL	DEL	3074	0	0	0	0	0			unitig_30	1013174	1016248	PA7_GAP	PM1118_GAP	PM448_GAP	PM449_GAP	unitig_30	1013155	DEL00001915	C	<DEL>	.	PASS	PRECISE;SVTYPE=DEL;SVMETHOD=EMBL.DELLYv0.7.7;CHR2=unitig_30;END=1016249;PE=45;MAPQ=60;CT=3to5;CIPOS=-10,10;CIEND=-10,10;INSLEN=0;HOMLEN=9;SR=10;SRQ=1;CONSENSUS=CATTCTAGGCCGATGGGGCACCACGGACGGCGTGTCTTTTGCGGAGACCACGGAACCCACCCACGCTCACCACAACAGAACGAACATCTTTGCCTTCGAGAAAGGGGTCCCCGTCTAGCCACAT;CE=1.95821	GT:GL:GQ:FT:RCL:RC:RCR:CN:DR:DV:RR:RV	1/1:-30.0975,-2.70677,0:27:PASS:277:74:319:0:0:45:0:9	1/1:-285.385,-24.3688,0:10000:PASS:908:8:565:0:0:70:0:81	1/1:-253.787,-21.9621,0:10000:PASS:1140:2:815:0:0:105:0:73	1/1:-157.992,-13.8392,0:138:PASS:774:146:773:0:0:85:0:46	unitig_30	1013164	969	N	<DEL>	.	.	SVTYPE=DEL;STRANDS=+-:483;SVLEN=-3084;END=1016248;CIPOS=0,0;CIEND=0,0;CIPOS95=0,0;CIEND95=0,0;SU=483;PE=307;SR=176	GT:SU:PE:SR	./.:49:45:4	./.:137:71:66	./.:169:106:63	./.:128:85:43
unitig_30	1877575	1877806	-	DEL	-	-	231	0	0	1	1	0	TM1119_g6831		unitig_30	1877575	1877806	-	PM1118_GAP	-	-	unitig_30	1877570	DEL00001969	T	<DEL>	.	PASS	PRECISE;SVTYPE=DEL;SVMETHOD=EMBL.DELLYv0.7.7;CHR2=unitig_30;END=1877807;PE=8;MAPQ=60;CT=3to5;CIPOS=-6,6;CIEND=-6,6;INSLEN=0;HOMLEN=5;SR=10;SRQ=0.994012;CONSENSUS=ATAACTGCCGTAGGCATGGTCGTCCAGGTCTACGTGACCGTAGCCCGCTTCATCTCCCTGCCGTACTCGATCTGGGCCGTCATCGCGGCAGCAGCTGCATGTGCTCATCGGCCTGGCCACCGTGGCGCTGGTCTTCACCGGCTTCCTGATCTTCTACACGGTCGCAA;CE=1.93573	GT:GL:GQ:FT:RCL:RC:RCR:CN:DR:DV:RR:RV	0/0:0,-4.20946,-46.395:42:PASS:2356:4085:2474:2:34:0:14:0	1/1:-193.892,-16.5488,0:10000:PASS:6397:635:7074:0:11:8:0:55	0/0:0,-25.8729,-298.084:10000:PASS:11725:23312:11033:2:106:0:86:0	0/0:0,-12.0342,-140.193:120:PASS:5571:11737:7665:2:51:0:40:0	unitig_30	1877574	985	N	<DEL>	.	.	SVTYPE=DEL;STRANDS=+-:45;SVLEN=-232;END=1877806;CIPOS=0,0;CIEND=0,0;CIPOS95=0,0;CIEND95=0,0;SU=45;PE=0;SR=45	GT:SU:PE:SR	./.:0:0:0	./.:45:0:45	./.:0:0:0	./.:0:0:0
unitig_30	1938885	1938961	DEL	-	-	-	76	0	0	0	0	0			unitig_30	1938885	1938961	PA7_GAP	-	-	-	unitig_30	1938880	DEL00001973	CTTAATATGCACCAGCCAATAAGGCGGGCCAAGCGAAATGTGCAGTCGTTGACTTATCCCTACTAGCTTCCGTCACCTGTCA	C	.	PASS	PRECISE;SVTYPE=DEL;SVMETHOD=EMBL.DELLYv0.7.7;CHR2=unitig_30;END=1938962;PE=0;MAPQ=60;CT=3to5;CIPOS=-5,5;CIEND=-5,5;INSLEN=0;HOMLEN=4;SR=10;SRQ=0.991597;CONSENSUS=GGGGGGTATGCCTTGGGAGCCAGACACGTGAATTTGGCTTAAAGAGGTACTATGCAATACAGAACACTGCACACTGCACAGCGCGTGGTCGCGTCCTCATCCCTCCCGCCAAATTTGTT;CE=1.99576	GT:GL:GQ:FT:RCL:RC:RCR:CN:DR:DV:RR:RV	1/1:-43.1981,-3.61046,0:36:PASS:494:39:939:0:0:0:0:12	0/0:0,-6.01732,-69.1967:60:PASS:1928:2432:1323:1:0:0:20:0	0/0:0,-14.1404,-163.992:141:PASS:2879:4717:2018:2:0:0:47:0	0/0:0,-17.1457,-195.187:10000:PASS:2800:6062:3056:2:0:0:57:0	unitig_30	1938884	986	N	<DEL>	.	.	SVTYPE=DEL;STRANDS=+-:8;SVLEN=-77;END=1938961;CIPOS=-10,5;CIEND=-9,9;CIPOS95=0,0;CIEND95=0,0;SU=8;PE=0;SR=8	GT:SU:PE:SR	./.:8:0:8	./.:0:0:0	./.:0:0:0	./.:0:0:0
unitig_30	1968484	1968896	-	DEL	DEL	DEL	412	0	0	0	0	0			unitig_30	1968484	1968896	PA7_GAP	PM1118_GAP	PM448_GAP	PM449_GAP	unitig_30	1968473	DEL00001977	G	<DEL>	.	PASS	PRECISE;SVTYPE=DEL;SVMETHOD=EMBL.DELLYv0.7.7;CHR2=unitig_30;END=1968897;PE=9;MAPQ=60;CT=3to5;CIPOS=-11,11;CIEND=-11,11;INSLEN=0;HOMLEN=10;SR=10;SRQ=0.989247;CONSENSUS=GTTAAATAATTTGATTCATTGAATTTTGATAAGGTTAGGATAAGGATTTAATGAAAAGATGAGGAAAAAGTGAGTATACCATAAGGTAGTAGGGTAAATGTAACCGAAAAAATGATTTTGGCCCAATTCGCCTTATCGCCAACCGTAGGTGAGATTCAAAAAGTTATGCCCCGCGTCAATTGATTT;CE=1.90419	GT:GL:GQ:FT:RCL:RC:RCR:CN:DR:DV:RR:RV	./.:0,0,0:0:LowQual:8580:223:4111:0:0:58:0:0	1/1:-26.1994,-2.10659,0:21:PASS:2822:54:4484:0:0:10:0:7	1/1:-38.8984,-3.30977,0:33:PASS:1513:78:6282:0:0:9:0:11	1/1:-216.294,-17.7545,0:10000:PASS:15770:456:14403:0:0:78:0:59	unitig_30	1968483	987	N	<DEL>	.	.	SVTYPE=DEL;STRANDS=+-:162;SVLEN=-413;END=1968896;CIPOS=0,0;CIEND=0,0;CIPOS95=0,0;CIEND95=0,0;SU=162;PE=86;SR=76	GT:SU:PE:SR	./.:52:51:1	./.:7:0:7	./.:20:9:11	./.:82:25:57
unitig_30	2363018	2363802	-	-	DEL	-	784	0	0	0	0	0			unitig_30	2363018	2363802	-	-	PM448_GAP	-	unitig_30	2363017	DEL00002006	A	<DEL>	.	PASS	PRECISE;SVTYPE=DEL;SVMETHOD=EMBL.DELLYv0.7.7;CHR2=unitig_30;END=2363803;PE=13;MAPQ=60;CT=3to5;CIPOS=-2,2;CIEND=-2,2;INSLEN=0;HOMLEN=2;SR=7;SRQ=0.983051;CONSENSUS=TCTAGGAACAAATAGCAATCAAGACGATCTGAAGCAATAATAAGATCTTTAAGAAGGTAGCATCATCGACAAGCCAACATTTGATTCTACCAAAGTTCAGTAATTTGTGTTACTAATATCTCTATATGACAGTTTCACACAGAATTCAACTTTGTCTAATATGCGAAATGCTGATTA;CE=1.90562	GT:GL:GQ:FT:RCL:RC:RCR:CN:DR:DV:RR:RV	0/0:0,-5.71662,-68.6971:57:PASS:99:183:90:2:54:0:19:0	0/0:0,-4.51424,-57.0988:45:PASS:44:114:50:2:20:0:15:0	1/1:-18.7996,-1.50474,0:15:PASS:23:0:40:0:0:13:0:5	0/0:0,-22.2653,-268.589:10000:PASS:212:443:230:2:119:0:74:0	unitig_30	2363017	995	N	<DEL>	.	.	SVTYPE=DEL;STRANDS=+-:18;SVLEN=-785;END=2363802;CIPOS=-7,5;CIEND=-10,9;CIPOS95=0,0;CIEND95=0,0;SU=18;PE=13;SR=5	GT:SU:PE:SR	./.:0:0:0	./.:0:0:0	./.:18:13:5	./.:0:0:0
unitig_30	2399907	2400291	-	-	DEL	-	384	0	0	0	0	0			unitig_30	2399907	2400291	-	-	PM448_GAP	-	unitig_30	2399904	DEL00002008	G	<DEL>	.	PASS	PRECISE;SVTYPE=DEL;SVMETHOD=EMBL.DELLYv0.7.7;CHR2=unitig_30;END=2400292;PE=38;MAPQ=60;CT=3to5;CIPOS=-4,4;CIEND=-4,4;INSLEN=0;HOMLEN=3;SR=10;SRQ=1;CONSENSUS=CATGCAAGCCCCTAGCTCTACCTCGATGTTTCGCGCTTTTGCTAGGAGGTCTGAGGGTCAATCCCACTAAGGTGTCATTAAATGGCTGCCATTAATTACTTAATTACAGGTATCTGCCTTCACAGTGGACCTGTGATAAATGAGATGCCATGAGGATACTGGAGTTGCCC;CE=1.99448	GT:GL:GQ:FT:RCL:RC:RCR:CN:DR:DV:RR:RV	0/0:0,-1.50384,-16.6987:15:PASS:4071:8944:3735:2:43:0:5:0	0/0:0,-2.70782,-31.4985:27:PASS:4040:6686:4561:2:20:0:9:0	1/1:-101.094,-8.72402,0:87:PASS:7285:169:4324:0:0:38:0:29	0/0:0,-15.3454,-183.193:154:PASS:14828:28823:12893:2:75:0:51:0	unitig_30	2399906	996	N	<DEL>	.	.	SVTYPE=DEL;STRANDS=+-:56;SVLEN=-385;END=2400291;CIPOS=-10,9;CIEND=-2,0;CIPOS95=0,0;CIEND95=0,0;SU=56;PE=31;SR=25	GT:SU:PE:SR	./.:0:0:0	./.:0:0:0	./.:56:31:25	./.:0:0:0
unitig_30	2457572	2457637	-	-	DEL	-	65	0	0	0	0	0			unitig_30	2457572	2457637	-	-	PM448_GAP	-	unitig_30	2457568	DEL00002012	ACGGCTTATTGTTCATGGCCCTCCTGAGTTCCCTGTCTGTCTATCACCTTTGTCAGTCTTGTCCGTCTTT	A	.	PASS	PRECISE;SVTYPE=DEL;SVMETHOD=EMBL.DELLYv0.7.7;CHR2=unitig_30;END=2457638;PE=0;MAPQ=60;CT=3to5;CIPOS=-5,5;CIEND=-5,5;INSLEN=0;HOMLEN=4;SR=10;SRQ=1;CONSENSUS=AGAAATGCCGCCGATGGGGTGCATGGATAGACTCAATGGGCATACGCAACAGGTCTGCATAATAAGGCTGAAGTGGGGAACGGTCGGCCACTTAGTTAGTTATATAGTCAGTCAGCTGATAAGTCAGTTTCCGCAACAACACACGCTGAAGTTACAATTCTTGAAA;CE=1.98109	GT:GL:GQ:FT:RCL:RC:RCR:CN:DR:DV:RR:RV	0/0:0,-4.81446,-58.698:48:PASS:987:1724:566:2:0:0:16:0	0/0:0,-5.41615,-64.9976:54:PASS:1469:1885:548:2:0:0:18:0	1/1:-200.593,-16.55,0:10000:PASS:1495:133:1155:0:0:0:0:55	0/0:0,-20.762,-250.891:10000:PASS:2925:6174:2603:2:0:0:69:0	unitig_30	2457571	998	N	<DEL>	.	.	SVTYPE=DEL;STRANDS=+-:38;SVLEN=-66;END=2457637;CIPOS=0,0;CIEND=0,0;CIPOS95=0,0;CIEND95=0,0;SU=38;PE=0;SR=38	GT:SU:PE:SR	./.:0:0:0	./.:0:0:0	./.:38:0:38	./.:0:0:0
unitig_30	2554437	2554550	DEL	-	DEL	-	113	0	0	0	0	0			unitig_30	2554437	2554550	PA7_GAP	-	PM448_GAP	-	unitig_30	2554430	DEL00002020	ATCTCAAATCATGGCCTGCGTAACCGCCAACACTATGATAGTTGCTTATTGTAAATCAGCTCATGTGTTGCACACTTGATCTCGTGTTTTCAATTGAGAGCTGCTGGATGTGTTCTGTTAG	A	.	PASS	PRECISE;SVTYPE=DEL;SVMETHOD=EMBL.DELLYv0.7.7;CHR2=unitig_30;END=2554551;PE=0;MAPQ=60;CT=3to5;CIPOS=-7,7;CIEND=-7,7;INSLEN=0;HOMLEN=9;SR=10;SRQ=1;CONSENSUS=TGGGAAAGTCACTTATATCATTTGTTCTGAAGAATTTGAGTGACCCAAAGTGGATAGATCTCAATGTGGGGTCTTGTCATTAGCTGTTAATATGTGTAAAATTTGGC;CE=1.9102	GT:GL:GQ:FT:RCL:RC:RCR:CN:DR:DV:RR:RV	1/1:-56.8988,-4.51427,0:45:PASS:1041:86:1190:0:0:0:0:15	0/0:0,-4.21161,-49.5972:42:PASS:912:2426:969:3:0:0:14:0	1/1:-20.6989,-1.80505,0:18:PASS:467:29:443:0:0:0:0:6	0/0:0,-19.86,-243.992:10000:PASS:4890:11738:5664:2:0:0:66:0	unitig_30	2554436	1004	N	<DEL>	.	.	SVTYPE=DEL;STRANDS=+-:19;SVLEN=-114;END=2554550;CIPOS=-1,0;CIEND=-1,0;CIPOS95=0,0;CIEND95=0,0;SU=19;PE=0;SR=19	GT:SU:PE:SR	./.:14:0:14	./.:0:0:0	./.:5:0:5	./.:0:0:0
unitig_30	2583015	2583564	-	DEL	-	-	549	0	0	1	1	0	TM1119_g7060		unitig_30	2583015	2583564	-	PM1118_GAP	-	-	unitig_30	2583006	DEL00002025	T	<DEL>	.	PASS	PRECISE;SVTYPE=DEL;SVMETHOD=EMBL.DELLYv0.7.7;CHR2=unitig_30;END=2583565;PE=20;MAPQ=60;CT=3to5;CIPOS=-11,11;CIEND=-11,11;INSLEN=0;HOMLEN=10;SR=10;SRQ=0.994253;CONSENSUS=AAGCAATCAGTAGCTACACAACAATGCAGCCCAACTTCTCTTTCTACATTCTGGCTGCACTTCATGCTGCTCTTACCTTTTCCAGATCGCATCCGACGAGACAGACGATGAAGGACCTTGTTTCGGCGAGTCCAGGACTGGCAAGCCAAGGTGTCTTAAGGCCACACTTTGGGA;CE=1.99417	GT:GL:GQ:FT:RCL:RC:RCR:CN:DR:DV:RR:RV	0/0:0,-3.30994,-40.2986:33:PASS:57:85:45:2:39:0:11:0	1/1:-64.4974,-5.41592,0:54:PASS:37:1:33:0:0:20:0:18	0/0:0,-9.62929,-116.296:96:PASS:36:141:83:2:35:0:32:0	0/0:0,-19.5574,-231.99:10000:PASS:161:323:137:2:113:0:65:0	unitig_30	2583014	1006	N	<DEL>	.	.	SVTYPE=DEL;STRANDS=+-:35;SVLEN=-550;END=2583564;CIPOS=-3,1;CIEND=-6,9;CIPOS95=0,0;CIEND95=0,0;SU=35;PE=20;SR=15	GT:SU:PE:SR	./.:0:0:0	./.:35:20:15	./.:0:0:0	./.:0:0:0
unitig_30	2614416	2614464	-	DEL	-	-	48	0	0	0	0	0			unitig_30	2614416	2614464	-	PM1118_GAP	-	-	unitig_30	2614413	DEL00002026	TCGTAGTGGTGTGTGTGGGCAAAGGCTATTGAGCATAAGTGCAAGGAATAAG	T	.	PASS	PRECISE;SVTYPE=DEL;SVMETHOD=EMBL.DELLYv0.7.7;CHR2=unitig_30;END=2614465;PE=0;MAPQ=60;CT=3to5;CIPOS=-4,4;CIEND=-4,4;INSLEN=0;HOMLEN=4;SR=10;SRQ=1;CONSENSUS=TGACAGTCTGACCGTATCTCGTGATTGACTCTGACATAGGTCAAGCATTTGTCTGCCGCGGCTGAGGGCGAGCTTCCGCACTTTCGGAATAGCTGGAGCTTCATCGGATTCGGTTAGTGCCGAGTCCGCTCTGCACAATGACGAACTGTGAATGGACCTTGAGATCACACCGCTTGGAGATGCGAGGAGTCTGATGGGTGAGAA;CE=1.98745	GT:GL:GQ:FT:RCL:RC:RCR:CN:DR:DV:RR:RV	0/0:0,-3.6107,-43.8983:36:PASS:525:896:431:2:0:0:12:0	1/1:-145.793,-12.6364,0:126:PASS:791:48:684:0:0:0:0:42	0/0:0,-13.8411,-164.194:138:PASS:1332:3125:1549:2:0:0:46:0	0/0:0,-14.7421,-173.792:147:PASS:1545:3451:1994:2:0:0:49:0	unitig_30	2614415	1007	N	<DEL>	.	.	SVTYPE=DEL;STRANDS=+-:15;SVLEN=-49;END=2614464;CIPOS=-10,9;CIEND=-10,9;CIPOS95=0,0;CIEND95=0,0;SU=15;PE=0;SR=15	GT:SU:PE:SR	./.:0:0:0	./.:15:0:15	./.:0:0:0	./.:0:0:0
unitig_30	2635887	2637331	DEL	-	-	-	1444	1	0	0	1	0	TM1119_g7085		unitig_30	2635887	2637331	PA7_GAP	-	-	-	unitig_30	2635886	DEL00002031	T	<DEL>	.	PASS	PRECISE;SVTYPE=DEL;SVMETHOD=EMBL.DELLYv0.7.7;CHR2=unitig_30;END=2637332;PE=39;MAPQ=60;CT=3to5;CIPOS=-1,1;CIEND=-1,1;INSLEN=0;HOMLEN=0;SR=10;SRQ=0.992537;CONSENSUS=GGTCGTGACAGGCTTGACACCAAGATGGTATTCAATCTAGGTGCAATAACACTAATGGCAGTAATGGATTGTATACGTGCTATATCCAGACTATCCTCGCTCTGGGCGAACTGGAAAATGGCTTACGGCAAGAG;CE=1.98771	GT:GL:GQ:FT:RCL:RC:RCR:CN:DR:DV:RR:RV	1/1:-51.1983,-4.21271,0:42:PASS:138:0:140:0:0:39:0:14	0/0:0,-6.61957,-77.5969:66:PASS:130:243:91:2:24:0:22:0	0/0:0,-10.2304,-121.495:102:PASS:137:239:123:2:28:0:34:0	0/0:0,-17.1534,-212.395:10000:PASS:371:746:422:2:96:0:57:0	unitig_30	2635886	1008	N	<DEL>	.	.	SVTYPE=DEL;STRANDS=+-:45;SVLEN=-1445;END=2637331;CIPOS=-10,9;CIEND=-6,2;CIPOS95=0,0;CIEND95=0,0;SU=45;PE=39;SR=6	GT:SU:PE:SR	./.:45:39:6	./.:0:0:0	./.:0:0:0	./.:0:0:0
unitig_30	2709396	2709476	DEL	-	-	-	80	0	0	0	0	0			unitig_30	2709396	2709476	PA7_GAP	-	-	-	unitig_30	2709393	DEL00002034	CTTCTCGCCTTTATGTAGTACCTAATATCTGAGCTTTTATAAATATGGAATGTAGTAAAGAGTATAAGAATGATCAAAACTTTG	C	.	PASS	PRECISE;SVTYPE=DEL;SVMETHOD=EMBL.DELLYv0.7.7;CHR2=unitig_30;END=2709477;PE=0;MAPQ=60;CT=3to5;CIPOS=-3,3;CIEND=-3,3;INSLEN=0;HOMLEN=2;SR=10;SRQ=1;CONSENSUS=TGACATAATCCGTCCGATTTAGAGAAAGCGTGGTCGTCTGGCCTAGTTATCCCCAACATACCTATTCCTTTGAAACACTGACGTCAGCCCCTCAGTCTGGCTGTACTCGTTTAGAAGGAGTCAATGGCACCT;CE=1.99257	GT:GL:GQ:FT:RCL:RC:RCR:CN:DR:DV:RR:RV	1/1:-50.2974,-4.2118,0:42:PASS:748:34:460:0:0:0:0:14	0/0:0,-4.81365,-58.2972:48:PASS:810:1536:691:2:0:0:16:0	0/0:0,-1.50468,-18.5995:15:PASS:228:495:573:1:0:0:5:0	0/0:0,-22.5686,-273.791:10000:PASS:4279:7599:3165:2:0:0:75:0	unitig_30	2709395	1009	N	<DEL>	.	.	SVTYPE=DEL;STRANDS=+-:7;SVLEN=-81;END=2709476;CIPOS=-5,4;CIEND=-5,4;CIPOS95=0,0;CIEND95=0,0;SU=7;PE=0;SR=7	GT:SU:PE:SR	./.:7:0:7	./.:0:0:0	./.:0:0:0	./.:0:0:0
unitig_30	2740747	2740946	DEL	-	-	-	199	0	0	0	0	0			unitig_30	2740747	2740946	PA7_GAP	-	-	-	unitig_30	2740744	DEL00002038	CCATATTGCCTTCAATTTATTGTCGCTGGGCTTTGTCGACTCCCTTCCTCATGGAGTAGCCCATTTGGGTCCGACCCCATGGGGAAGCGTAATTATCCGCGTTTATCCAGTCCGCCACGGCTCGCCGAGCCAATCCAGCAAAATCAGCTGAGTTGGAATCGCCGACTATTATGGTAATCTCCTGTATTCTAATCCATCACGGTAATCA	C	.	PASS	PRECISE;SVTYPE=DEL;SVMETHOD=EMBL.DELLYv0.7.7;CHR2=unitig_30;END=2740952;PE=0;MAPQ=60;CT=3to5;CIPOS=-5,5;CIEND=-5,5;INSLEN=0;HOMLEN=8;SR=10;SRQ=1;CONSENSUS=GGGCAATATAAAAAGCTTGTCTTTCAGATGTGAAACAAAAACGCGCCAATCCCAGATCTTCAAACTTCAAAGCAAGCACGAGGCGTTGTTGACGGGCGCTCCACGTGAATGCTC;CE=1.98224	GT:GL:GQ:FT:RCL:RC:RCR:CN:DR:DV:RR:RV	1/1:-75.7969,-6.31849,0:63:PASS:1499:44:2683:0:0:0:0:21	0/0:0,-6.9208,-83.0971:69:PASS:2732:5709:3434:2:0:0:23:0	0/0:0,-10.2297,-119.095:102:PASS:3747:8159:4215:2:0:0:34:0	0/0:0,-9.02798,-111.697:90:PASS:8372:15192:7102:2:0:0:30:0	unitig_30	2740746	1010	N	<DEL>	.	.	SVTYPE=DEL;STRANDS=+-:15;SVLEN=-205;END=2740951;CIPOS=-10,7;CIEND=-2,1;CIPOS95=0,0;CIEND95=0,0;SU=15;PE=0;SR=15	GT:SU:PE:SR	./.:15:0:15	./.:0:0:0	./.:0:0:0	./.:0:0:0
unitig_30	2795873	2796690	-	-	DEL	-	817	0	0	0	0	0			unitig_30	2795873	2796690	-	-	PM448_GAP	-	unitig_30	2795871	DEL00002045	C	<DEL>	.	PASS	PRECISE;SVTYPE=DEL;SVMETHOD=EMBL.DELLYv0.7.7;CHR2=unitig_30;END=2796691;PE=52;MAPQ=60;CT=3to5;CIPOS=-2,2;CIEND=-2,2;INSLEN=0;HOMLEN=2;SR=10;SRQ=0.990909;CONSENSUS=CGGAGCCGCCTCAAGAATATCCCGGCTCGAACCGGCAGCATGCCTTGCCAACAAGGAACCGGCACTGTTCGCCTCTGCCTTTTCATTACCGACCCGCCGCAACAGTGCTCTGTAAGAACATGGATGGTCATACTTGGTTGTCGGGTGATGTTGAGTCAAGATTTTTTGGTGAATGACGTATTTACTAACTCGATGGCTGGGTGGCCTGAGGAGATCGAGG;CE=1.99414	GT:GL:GQ:FT:RCL:RC:RCR:CN:DR:DV:RR:RV	0/0:0,-2.10631,-25.5991:21:PASS:76:138:81:2:44:0:7:0	0/0:0,-16.2478,-192.092:10000:PASS:175:437:78:3:50:1:54:0	1/1:-125.395,-10.5306,0:105:PASS:126:3:103:0:0:53:0:35	0/0:0,-10.8334,-133.496:108:PASS:168:435:223:2:72:0:36:0	unitig_30	2795872	1011	N	<DEL>	.	.	SVTYPE=DEL;STRANDS=+-:66;SVLEN=-818;END=2796690;CIPOS=-3,2;CIEND=-10,9;CIPOS95=0,0;CIEND95=0,0;SU=66;PE=56;SR=10	GT:SU:PE:SR	./.:0:0:0	./.:1:1:0	./.:65:55:10	./.:0:0:0
unitig_30	2917095	2917197	DEL	-	-	-	102	0	0	0	0	0			unitig_30	2917095	2917197	PA7_GAP	-	-	-	unitig_30	2917087	DEL00002056	CAACCCCGCTTCAAAACCCGTCAGAGAACTCCATGCCACGTTCTGTCAGTGTCATGGGAGTCCACCAATATGAGCCCTCCTCACTGTTCTCTCTGCCTTGATTTG	C	.	PASS	PRECISE;SVTYPE=DEL;SVMETHOD=EMBL.DELLYv0.7.7;CHR2=unitig_30;END=2917192;PE=0;MAPQ=60;CT=3to5;CIPOS=-9,9;CIEND=-9,9;INSLEN=0;HOMLEN=9;SR=10;SRQ=0.972028;CONSENSUS=CTTTGGACAGAGTACATATATATTTCATAACTTCTAGTCGGTACGCAAGGCTTCCGTCTTTCCATATCTCAACCCCGATCTGTTTAAGTCTGGACATGATTTTTGCTATCCTTTTGAATACAAAGACTCCAACCTAGCCCGAT;CE=1.94971	GT:GL:GQ:FT:RCL:RC:RCR:CN:DR:DV:RR:RV	1/1:-43.6983,-3.61067,0:36:PASS:762:75:546:0:0:0:0:12	0/0:0,-1.20345,-13.8993:12:LowQual:1055:1257:762:1:0:0:4:0	0/0:0,-4.81426,-57.4978:48:PASS:2158:2140:1285:1:0:0:16:0	0/0:0,-16.55,-198.593:10000:PASS:3548:8149:4449:2:0:0:55:0	unitig_30	2917094	1013	N	<DEL>	.	.	SVTYPE=DEL;STRANDS=+-:9;SVLEN=-97;END=2917191;CIPOS=-4,3;CIEND=-4,3;CIPOS95=0,0;CIEND95=0,0;SU=9;PE=0;SR=9	GT:SU:PE:SR	./.:9:0:9	./.:0:0:0	./.:0:0:0	./.:0:0:0
unitig_30	3010568	3011665	DEL	-	-	-	1097	0	0	0	0	1		TM1119_g7212	unitig_30	3010568	3011665	PA7_GAP	-	-	-	unitig_30	3010560	DEL00002060	C	<DEL>	.	PASS	PRECISE;SVTYPE=DEL;SVMETHOD=EMBL.DELLYv0.7.7;CHR2=unitig_30;END=3011666;PE=45;MAPQ=60;CT=3to5;CIPOS=-9,9;CIEND=-9,9;INSLEN=0;HOMLEN=9;SR=10;SRQ=0.983333;CONSENSUS=AACCTGGGCGAAATAACTCATTAAACAGCGTGGTATTATGTTATAACTGAAATTATTGTCCGGGGTAGGATCGTATCAACTAGCCTCCCATAGTGCATCGGCGAGTTACCAAGGTACCTA;CE=1.98526	GT:GL:GQ:FT:RCL:RC:RCR:CN:DR:DV:RR:RV	1/1:-57.5971,-4.8136,0:48:PASS:112:0:110:0:0:45:0:16	0/0:0,-9.02702,-110.296:90:PASS:107:621:267:3:41:0:30:0	0/0:0,-4.51285,-52.6974:45:PASS:156:752:390:3:54:0:15:0	0/0:0,-9.62921,-115.396:96:PASS:297:469:285:2:97:0:32:0	unitig_30	3010567	1015	N	<DEL>	.	.	SVTYPE=DEL;STRANDS=+-:30;SVLEN=-1098;END=3011665;CIPOS=-4,3;CIEND=-4,1;CIPOS95=0,0;CIEND95=0,0;SU=30;PE=22;SR=8	GT:SU:PE:SR	./.:30:22:8	./.:0:0:0	./.:0:0:0	./.:0:0:0
unitig_30	3166155	3167148	-	-	DEL	-	993	1	0	0	1	0	TM1119_g7269		unitig_30	3166155	3167148	-	-	PM448_GAP	-	unitig_30	3166159	DEL00002071	T	<DEL>	.	PASS	PRECISE;SVTYPE=DEL;SVMETHOD=EMBL.DELLYv0.7.7;CHR2=unitig_30;END=3167149;PE=96;MAPQ=60;CT=3to5;CIPOS=-3,3;CIEND=-3,3;INSLEN=0;HOMLEN=3;SR=10;SRQ=0.967949;CONSENSUS=ATCACATCATAATAAGGTATCACCTAACACTGTCAGTGTCCAGTAGTAAAGGCGATTGACCACTTACTAATCAACGTGTCCTTCCGCGGCAGATGGCTCGTGGCATGCGACGGCGGACGCAGCACGGTGCGCAAGGCCGCAGGGTTCGACTTTG;CE=1.99391	GT:GL:GQ:FT:RCL:RC:RCR:CN:DR:DV:RR:RV	0/0:0,-1.80561,-22.0994:18:PASS:91:172:66:2:32:0:6:0	0/0:0,-18.0544,-216.693:10000:PASS:74:410:447:2:28:0:60:0	1/1:-286.092,-23.1714,0:10000:PASS:183:1:418:0:0:96:0:77	0/0:0,-6.61914,-77.6965:66:PASS:273:476:158:2:75:0:22:0	unitig_30	3166154	1018	N	<DEL>	.	.	SVTYPE=DEL;STRANDS=+-:52;SVLEN=-998;END=3167152;CIPOS=0,0;CIEND=0,0;CIPOS95=0,0;CIEND95=0,0;SU=52;PE=0;SR=52	GT:SU:PE:SR	./.:0:0:0	./.:0:0:0	./.:52:0:52	./.:0:0:0
unitig_30	3181280	3181946	DEL	DEL	DEL	DEL	666	0	0	0	0	0			unitig_30	3181280	3181946	PA7_GAP	PM1118_GAP	PM448_GAP	PM449_GAP	unitig_30	3181278	DEL00002072	G	<DEL>	.	PASS	IMPRECISE;SVTYPE=DEL;SVMETHOD=EMBL.DELLYv0.7.7;CHR2=unitig_30;END=3181946;PE=44;MAPQ=60;CT=3to5;CIPOS=-50,50;CIEND=-50,50	GT:GL:GQ:FT:RCL:RC:RCR:CN:DR:DV:RR:RV	1/1:-254.299,-13.2447,0:132:PASS:60:0:68:0:0:44:0:0	1/1:-131.3,-6.62265,0:66:PASS:38:2:41:0:0:22:0:0	1/1:-138,-6.92368,0:69:PASS:65:0:42:0:0:23:0:0	1/1:-558,-27.9957,0:10000:PASS:178:0:189:0:0:93:0:0	unitig_30	3181272	1019	N	<DEL>	.	.	SVTYPE=DEL;STRANDS=+-:237;SVLEN=-674;END=3181946;CIPOS=0,0;CIEND=0,0;CIPOS95=0,0;CIEND95=0,0;SU=237;PE=185;SR=52	GT:SU:PE:SR	./.:46:44:2	./.:28:22:6	./.:33:26:7	./.:130:93:37
unitig_30	3324439	3325176	-	DEL	-	DEL	737	0	0	0	0	0			unitig_30	3324439	3325176	-	PM1118_GAP	-	PM449_GAP	unitig_30	3324439	DEL00002083	T	<DEL>	.	PASS	IMPRECISE;SVTYPE=DEL;SVMETHOD=EMBL.DELLYv0.7.7;CHR2=unitig_30;END=3325175;PE=91;MAPQ=60;CT=3to5;CIPOS=-50,50;CIEND=-50,50	GT:GL:GQ:FT:RCL:RC:RCR:CN:DR:DV:RR:RV	0/0:0,-10.837,-214.2:108:PASS:72:121:70:2:36:0:0:0	1/1:-126,-0.92368,0:10:LowQual:51:1:49:0:1:22:0:0	0/0:0,-9.33192,-185.7:93:PASS:73:134:51:2:31:0:0:0	1/1:-541.5,-27.3935,0:10000:PASS:225:0:209:0:0:91:0:0	unitig_30	3324438	1024	N	<DEL>	.	.	SVTYPE=DEL;STRANDS=+-:180;SVLEN=-738;END=3325176;CIPOS=0,0;CIEND=0,0;CIPOS95=0,0;CIEND95=0,0;SU=180;PE=113;SR=67	GT:SU:PE:SR	./.:0:0:0	./.:32:21:11	./.:0:0:0	./.:147:92:55
unitig_30	3430985	3431169	DEL	-	-	-	184	0	0	0	0	0			unitig_30	3430985	3431169	PA7_GAP	-	-	-	unitig_30	3430983	DEL00002088	GAGGATTCAAGAAGGACGATATCTTGCTATAGCGGAGCACAGTTGCTCGAGACTCTAGCAGTGAGGACATATGAAAGCAGTGGTCTAAAGTCGAGATGCATTCACCAAGCCTCTTCTCCAATAAACATATCTAGCATGCCAAAGGAATTCCAGATCAGATTTAAAACGTTTATTTCGCTGACAAATT	G	.	PASS	PRECISE;SVTYPE=DEL;SVMETHOD=EMBL.DELLYv0.7.7;CHR2=unitig_30;END=3431170;PE=0;MAPQ=60;CT=3to5;CIPOS=-5,5;CIEND=-5,5;INSLEN=0;HOMLEN=5;SR=10;SRQ=1;CONSENSUS=GGCATCCGATGTCACAACTTTTGTTTTAACTAGACGTTGGCGCTTAACTATGGGAACAAAGAATTGACAGCTGGCATTGTTTTGGTATTAGCGAGTGCTTTGCCAGTTCAATCAATCCAAAGCAGTCG;CE=1.98119	GT:GL:GQ:FT:RCL:RC:RCR:CN:DR:DV:RR:RV	1/1:-35.0976,-3.00792,0:30:PASS:1257:17:1719:0:0:0:0:10	0/0:0,-4.51308,-52.2976:45:PASS:2730:2979:1611:1:0:0:15:0	0/0:0,-4.21284,-51.7984:42:PASS:1419:2827:2284:2:0:0:14:0	0/0:0,-18.0534,-215.992:10000:PASS:6767:13549:6709:2:0:0:60:0	unitig_30	3430984	1025	N	<DEL>	.	.	SVTYPE=DEL;STRANDS=+-:6;SVLEN=-185;END=3431169;CIPOS=-6,5;CIEND=-6,5;CIPOS95=0,0;CIEND95=0,0;SU=6;PE=0;SR=6	GT:SU:PE:SR	./.:6:0:6	./.:0:0:0	./.:0:0:0	./.:0:0:0
unitig_30	3440872	3441368	-	DEL	-	-	496	0	0	0	0	0			unitig_30	3440872	3441368	-	PM1118_GAP	-	-	unitig_30	3440872	DEL00002089	T	<DEL>	.	PASS	IMPRECISE;SVTYPE=DEL;SVMETHOD=EMBL.DELLYv0.7.7;CHR2=unitig_30;END=3441369;PE=26;MAPQ=60;CT=3to5;CIPOS=-109,109;CIEND=-109,109	GT:GL:GQ:FT:RCL:RC:RCR:CN:DR:DV:RR:RV	0/0:0,-10.8369,-204.6:108:PASS:5043:8758:4732:2:36:0:0:0	1/1:-153.8,-7.82676,0:78:PASS:5372:314:6977:0:0:26:0:0	0/0:0,-24.683,-484.899:10000:PASS:12798:41884:21319:2:82:0:0:0	0/0:0,-26.189,-516.599:10000:PASS:20185:34321:20664:2:87:0:0:0	unitig_30	3440871	1026	N	<DEL>	.	.	SVTYPE=DEL;STRANDS=+-:26;SVLEN=-497;END=3441368;CIPOS=-10,9;CIEND=-4,1;CIPOS95=0,0;CIEND95=0,0;SU=26;PE=18;SR=8	GT:SU:PE:SR	./.:0:0:0	./.:26:18:8	./.:0:0:0	./.:0:0:0
unitig_30	3498287	3498630	-	-	DEL	-	343	0	0	0	0	0			unitig_30	3498287	3498630	-	-	PM448_GAP	-	unitig_30	3498286	DEL00002094	A	<DEL>	.	PASS	PRECISE;SVTYPE=DEL;SVMETHOD=EMBL.DELLYv0.7.7;CHR2=unitig_30;END=3498631;PE=6;MAPQ=60;CT=3to5;CIPOS=-2,2;CIEND=-2,2;INSLEN=0;HOMLEN=2;SR=9;SRQ=0.984;CONSENSUS=CTTCGCCGATGGAACGGAAAGACTGACATTTGTAGAAACCAACACCTTCGCGCTCGCCGAACAGCTCTACTTTCAGTTCACCGTAGAACTTCTTATGCGACAGCTTTGAGTCAATCACGCCAGCCATCTACTCCAAATTATTTCTTATATGTGCGGCTGTGCTGGAAATTTTGCCCAAACATGAATTTATAGTAGAATGTTCGCACATCGTACTATCTAGCGCTTAGGTGCTCATTGCGAA…	GT:GL:GQ:FT:RCL:RC:RCR:CN:DR:DV:RR:RV	0/0:0,-2.40694,-28.7987:24:PASS:2511:6398:3329:2:35:0:8:0	0/0:0,-4.8146,-58.6981:48:PASS:3182:6550:4701:2:16:0:16:0	1/1:-25.1991,-2.10635,0:21:PASS:2669:3:813:0:0:6:0:7	0/0:0,-15.9472,-192.093:157:PASS:12705:29281:12961:2:86:0:53:0	unitig_30	3498286	1028	N	<DEL>	.	.	SVTYPE=DEL;STRANDS=+-:4;SVLEN=-344;END=3498630;CIPOS=-9,8;CIEND=-9,8;CIPOS95=0,0;CIEND95=0,0;SU=4;PE=0;SR=4	GT:SU:PE:SR	./.:0:0:0	./.:0:0:0	./.:4:0:4	./.:0:0:0
unitig_30	3507005	3507756	-	-	DEL	-	751	0	0	1	1	0	TM1119_g7388		unitig_30	3507005	3507756	-	-	PM448_GAP	-	unitig_30	3507004	DEL00002095	C	<DEL>	.	PASS	PRECISE;SVTYPE=DEL;SVMETHOD=EMBL.DELLYv0.7.7;CHR2=unitig_30;END=3507757;PE=31;MAPQ=60;CT=3to5;CIPOS=-3,3;CIEND=-3,3;INSLEN=0;HOMLEN=3;SR=10;SRQ=0.987879;CONSENSUS=ATTGATGCGAGGACTATTTGGTAACCTATTGACAATAGCCGGGTCAGGGGTACGTCCTCTCAGCATGGTTTGGCAGCTATTTGGCAGGCCAATTCAGCGACAGGATTGAGCCACTCAACGAGGCCTTTTTGCAGCACATCTTGACTGGAGAGAAATCGGAGCCTT;CE=1.99549	GT:GL:GQ:FT:RCL:RC:RCR:CN:DR:DV:RR:RV	0/0:0,-2.10563,-23.2984:21:PASS:65:112:57:2:36:0:7:0	0/0:0,-7.2215,-87.3968:72:PASS:81:177:61:2:31:0:24:0	1/1:-166.996,-13.2416,0:132:PASS:105:0:80:0:0:31:0:44	0/0:0,-19.258,-231.392:10000:PASS:186:364:196:2:105:0:64:0	unitig_30	3507004	1029	N	<DEL>	.	.	SVTYPE=DEL;STRANDS=+-:55;SVLEN=-752;END=3507756;CIPOS=-2,0;CIEND=-2,0;CIPOS95=0,0;CIEND95=0,0;SU=55;PE=31;SR=24	GT:SU:PE:SR	./.:0:0:0	./.:0:0:0	./.:55:31:24	./.:0:0:0
unitig_30	3508444	3509138	-	DEL	-	-	694	1	0	0	1	0	TM1119_g7389		unitig_30	3508444	3509138	-	PM1118_GAP	-	-	unitig_30	3508443	DEL00002096	C	<DEL>	.	PASS	PRECISE;SVTYPE=DEL;SVMETHOD=EMBL.DELLYv0.7.7;CHR2=unitig_30;END=3509139;PE=14;MAPQ=60;CT=3to5;CIPOS=-3,3;CIEND=-3,3;INSLEN=0;HOMLEN=2;SR=10;SRQ=1;CONSENSUS=CCGTGTCGTTCTTTCCCTTAAGAGATGTGCCGGTAATTCAAGAACATCCAAACGCCTGAGCATTCTCTCCCGCTACGGAGCTGGAGAAGCAGTTCGAACAACAGGCCCGAGCCCTCCGTCTCGCCTTGAATAAATTGCAGAACGACATGGACCCGCTCGTAGCGACGCAGGCCTACAACGATTGCT;CE=1.98591	GT:GL:GQ:FT:RCL:RC:RCR:CN:DR:DV:RR:RV	0/0:0,-1.20381,-15.2997:12:LowQual:62:131:46:2:37:0:4:0	1/1:-86.3979,-4.12347,0:41:PASS:47:1:93:0:0:14:1:24	0/0:0,-9.92745,-114.293:99:PASS:65:223:168:2:25:0:33:0	0/0:0,-8.42537,-102.297:84:PASS:176:342:203:2:108:0:28:0	unitig_30	3508443	1030	N	<DEL>	.	.	SVTYPE=DEL;STRANDS=+-:30;SVLEN=-695;END=3509138;CIPOS=-10,9;CIEND=-10,9;CIPOS95=0,0;CIEND95=0,0;SU=30;PE=14;SR=16	GT:SU:PE:SR	./.:0:0:0	./.:30:14:16	./.:0:0:0	./.:0:0:0
unitig_30	3598820	3599120	DEL	-	-	-	300	0	0	0	0	0			unitig_30	3598820	3599120	PA7_GAP				unitig_30	3598813	DEL00002104	A	<DEL>	.	PASS	PRECISE;SVTYPE=DEL;SVMETHOD=EMBL.DELLYv0.7.7;CHR2=unitig_30;END=3599121;PE=26;MAPQ=60;CT=3to5;CIPOS=-8,8;CIEND=-8,8;INSLEN=0;HOMLEN=8;SR=10;SRQ=0.992063;CONSENSUS=TAGCCGCAGTTCTAGGCACATCCCGCCTGCTAATCCATATTAGGAGGTATTACAGAAGTCTGCATCTAATAGCTGGAGAAAGCACCGTTCGATCGACGGGGAAACCTTCTCTAGCGTGTGGCCTGG;CE=1.99909	GT:GL:GQ:FT:RCL:RC:RCR:CN:DR:DV:RR:RV	1/1:-40.6988,-3.31018,0:33:PASS:1974:66:1374:0:0:26:0:11	1/1:-83.7973,-4.62253,0:46:PASS:4679:373:3419:0:2:12:1:24	1/1:-140.894,-12.0355,0:120:PASS:7897:190:6668:0:0:70:0:40	1/1:-236.592,-19.5586,0:10000:PASS:10726:276:10772:0:0:66:0:65	unitig_30	3598819	1032	N	<DEL>	.	.	SVTYPE=DEL;STRANDS=+-:107;SVLEN=-301;END=3599120;CIPOS=0,0;CIEND=0,0;CIPOS95=0,0;CIEND95=0,0;SU=107;PE=6;SR=101	GT:SU:PE:SR	./.:7:0:7	./.:18:0:18	./.:41:5:36	./.:41:1:40
unitig_30	3626952	3627038	DEL	-	-	-	86	0	0	0	0	0			unitig_30	3626952	3627038	PA7_GAP	-	-	-	unitig_30	3626949	DEL00002106	AAGCATTTCCAGGGCCTCGTCGTATCCTCCACGGCGAATTATCCATCGAGGTGATTCAGCAATAGCCCAGATGAGAAGAATGACAATGTT	A	.	PASS	PRECISE;SVTYPE=DEL;SVMETHOD=EMBL.DELLYv0.7.7;CHR2=unitig_30;END=3627039;PE=0;MAPQ=60;CT=3to5;CIPOS=-6,6;CIEND=-6,6;INSLEN=0;HOMLEN=5;SR=10;SRQ=0.992958;CONSENSUS=TCCTCTGGCAAAGATGATTAAGAAGCTCGAGCTCTTCTTCAGTCGCGTAGCTCGTGCTCGACTCAAGCATGTAGCAAAGGCATAATGAAGCCGAGCGCAATGGGCAACAAATTTCGCTGGTCCAATAAGGTGTTTTGCAAGT;CE=1.99642	GT:GL:GQ:FT:RCL:RC:RCR:CN:DR:DV:RR:RV	1/1:-45.6973,-3.91071,0:39:PASS:623:27:733:0:0:0:0:13	0/0:0,-4.21132,-48.2969:42:PASS:1319:2260:837:2:0:0:14:0	0/0:0,-6.92113,-83.9974:69:PASS:1935:2146:815:2:0:0:23:0	0/0:0,-21.6651,-259.791:10000:PASS:3947:8083:4264:2:0:0:72:0	unitig_30	3626951	1034	N	<DEL>	.	.	SVTYPE=DEL;STRANDS=+-:5;SVLEN=-87;END=3627038;CIPOS=-10,9;CIEND=-10,9;CIPOS95=0,0;CIEND95=0,0;SU=5;PE=0;SR=5	GT:SU:PE:SR	./.:5:0:5	./.:0:0:0	./.:0:0:0	./.:0:0:0
unitig_30	3704620	3704789	-	-	DEL	-	169	0	0	0	0	0			unitig_30	3704620	3704789	-	-	PM448_GAP	-	unitig_30	3704618	DEL00002110	CATGAGCTTTTCCTTCTTCTATGAATCTCTTCAAATTTGAGTCTCTGTATGTTACCCAGATTACTCTACACACTATTCCAAGTCTCGTGCCACTCTTCTTACTGCTCTTTTATATTATTGCACTCCTTGCGTCCGTAGTCGAGATACTCCACCCTTGAGTTGAAGTTTGTTG	C	.	PASS	PRECISE;SVTYPE=DEL;SVMETHOD=EMBL.DELLYv0.7.7;CHR2=unitig_30;END=3704790;PE=0;MAPQ=60;CT=3to5;CIPOS=-3,3;CIEND=-3,3;INSLEN=0;HOMLEN=2;SR=10;SRQ=0.974843;CONSENSUS=GATTCGTCTGGCTTGCCACCCCCACTGCTCGGAAGCCTCTCGTTATAGCTAAGACCAGAGTCGAGAGGGTTATTCCAGACCTACACTTCTGATATCGTAAGATACGATTGATTCCTTGATCGCGTAACCGCGCACACTTGTGTGCCTAGAGCATCAGGC;CE=1.99427	GT:GL:GQ:FT:RCL:RC:RCR:CN:DR:DV:RR:RV	0/0:0,-4.51192,-54.2965:45:PASS:1410:3189:1894:2:0:0:15:0	0/0:0,-6.61996,-79.1973:66:PASS:2114:3997:1947:2:0:0:22:0	1/1:-142.993,-12.3356,0:123:PASS:4896:47:1819:0:0:0:0:41	0/0:0,-17.4522,-211.592:10000:PASS:7328:12996:5894:2:0:0:58:0	unitig_30	3704618	1035	N	<DEL>	.	.	SVTYPE=DEL;STRANDS=+-:37;SVLEN=-171;END=3704789;CIPOS=0,0;CIEND=0,0;CIPOS95=0,1;CIEND95=0,0;IMPRECISE;SU=37;PE=0;SR=37	GT:SU:PE:SR	./.:0:0:0	./.:0:0:0	./.:37:0:37	./.:0:0:0
unitig_30	3779358	3779885	-	-	DEL	-	527	0	0	0	0	0			unitig_30	3779358	3779885	-	-	PM448_GAP	-	unitig_30	3779353	DEL00002114	T	<DEL>	.	PASS	PRECISE;SVTYPE=DEL;SVMETHOD=EMBL.DELLYv0.7.7;CHR2=unitig_30;END=3779886;PE=75;MAPQ=60;CT=3to5;CIPOS=-6,6;CIEND=-6,6;INSLEN=0;HOMLEN=6;SR=10;SRQ=1;CONSENSUS=GATACCCTCTTATATGAGCCAGCTAGGAGTGTTCAACCATCAAGTCTCTTCGGAAAACTTACCATTCAGGTGCTTGCAGGAGCATTGAGCGGAATCATGGAATGAAAACCGGGGGCAAGCCTGCCCTCCGTGAGTACGGCCGACGGTGAGACGTTGT;CE=1.99501	GT:GL:GQ:FT:RCL:RC:RCR:CN:DR:DV:RR:RV	0/0:0,-2.1062,-25.499:21:PASS:33:70:34:2:20:0:7:0	0/0:0,-7.43275,-122.396:74:PASS:45:137:122:2:48:1:35:1	1/1:-324.888,-27.0808,0:10000:PASS:178:0:171:0:0:88:0:90	0/0:0,-18.0551,-219.593:10000:PASS:128:266:122:2:109:0:60:0	unitig_30	3779357	1041	N	<DEL>	.	.	SVTYPE=DEL;STRANDS=+-:169;SVLEN=-528;END=3779885;CIPOS=0,0;CIEND=0,0;CIPOS95=0,0;CIEND95=0,0;SU=169;PE=97;SR=72	GT:SU:PE:SR	./.:0:0:0	./.:1:0:1	./.:168:97:71	./.:0:0:0
unitig_30	4541327	4541639	-	DEL	-	-	312	0	1	0	1	0	TM1119_g7698		unitig_30	4541327	4541639	-	PM1118_GAP	-	-	unitig_30	4541317	DEL00002174	A	<DEL>	.	PASS	PRECISE;SVTYPE=DEL;SVMETHOD=EMBL.DELLYv0.7.7;CHR2=unitig_30;END=4541640;PE=8;MAPQ=60;CT=3to5;CIPOS=-10,10;CIEND=-10,10;INSLEN=0;HOMLEN=9;SR=10;SRQ=0.970414;CONSENSUS=TGTGCCGTTTCTCTCCTAGAAGAAGCCGCAGAAGGCAGAGGAGATCCTTCTCTCCGAGACTTACTGGCCAGCCTCACGTGCAGAGTTTATGAGGCAGCCTCTCGAAGCAGGCTGTTCGCCTGGTCTCTTCAGATTTGGGCATGATAGAGCCACTACGTCCCACCGCC;CE=1.98543	GT:GL:GQ:FT:RCL:RC:RCR:CN:DR:DV:RR:RV	0/0:0,-2.10637,-25.6992:21:PASS:2768:5309:2416:2:28:0:7:0	1/1:-76.0975,-6.31909,0:63:PASS:3403:327:1789:0:0:8:0:21	0/0:0,-4.21294,-51.9985:42:PASS:9091:9816:1963:2:13:1:14:0	0/0:0,-8.72556,-103.496:87:PASS:9931:21656:13190:2:83:1:29:0	unitig_30	4541326	1067	N	<DEL>	.	.	SVTYPE=DEL;STRANDS=+-:19;SVLEN=-313;END=4541639;CIPOS=-3,1;CIEND=-2,1;CIPOS95=0,0;CIEND95=0,0;SU=19;PE=1;SR=18	GT:SU:PE:SR	./.:0:0:0	./.:18:0:18	./.:0:0:0	./.:1:1:0
unitig_30	4545304	4548618	DEL	-	-	DEL	3314	0	1	0	1	1	TM1119_g7699	TM1119_g7700	unitig_30	4545304	4548618	PA7_GAP	-	-	PM449_GAP	unitig_30	4545304	DEL00002175	A	<DEL>	.	PASS	IMPRECISE;SVTYPE=DEL;SVMETHOD=EMBL.DELLYv0.7.7;CHR2=unitig_30;END=4548690;PE=76;MAPQ=60;CT=3to5;CIPOS=-194,194;CIEND=-194,194	GT:GL:GQ:FT:RCL:RC:RCR:CN:DR:DV:RR:RV	1/1:-195.299,-10.5354,0:105:PASS:286:2:340:0:0:35:0:0	1/1:-139.299,-7.82626,0:78:PASS:597:6:410:0:0:26:0:0	0/0:0,-20.771,-414:10000:PASS:876:1256:680:2:69:0:0:0	1/1:-424.699,-22.8772,0:10000:PASS:900:0:890:0:0:76:0:0	unitig_30	4545302	1068	N	<DEL>	.	.	SVTYPE=DEL;STRANDS=+-:139;SVLEN=-3366;END=4548668;CIPOS=-10,270;CIEND=-188,4;CIPOS95=0,75;CIEND95=-59,0;IMPRECISE;SU=139;PE=139;SR=0	GT:SU:PE:SR	./.:36:36:0	./.:26:26:0	./.:0:0:0	./.:77:77:0
unitig_30	4545304	4548689	-	DEL	-	-	3385	0	1	0	1	1	TM1119_g7699	TM1119_g7700	unitig_30	4545304	4548689	-	PM1118_GAP	-	-	unitig_30	4545304	DEL00002175	A	<DEL>	.	PASS	IMPRECISE;SVTYPE=DEL;SVMETHOD=EMBL.DELLYv0.7.7;CHR2=unitig_30;END=4548690;PE=76;MAPQ=60;CT=3to5;CIPOS=-194,194;CIEND=-194,194	GT:GL:GQ:FT:RCL:RC:RCR:CN:DR:DV:RR:RV	1/1:-195.299,-10.5354,0:105:PASS:286:2:340:0:0:35:0:0	1/1:-139.299,-7.82626,0:78:PASS:597:6:410:0:0:26:0:0	0/0:0,-20.771,-414:10000:PASS:876:1256:680:2:69:0:0:0	1/1:-424.699,-22.8772,0:10000:PASS:900:0:890:0:0:76:0:0	unitig_30	4545302	1068	N	<DEL>	.	.	SVTYPE=DEL;STRANDS=+-:139;SVLEN=-3366;END=4548668;CIPOS=-10,270;CIEND=-188,4;CIPOS95=0,75;CIEND95=-59,0;IMPRECISE;SU=139;PE=139;SR=0	GT:SU:PE:SR	./.:36:36:0	./.:26:26:0	./.:0:0:0	./.:77:77:0
unitig_30	4683251	4684359	DEL	-	-	DEL	1108	0	0	0	0	0			unitig_30	4683251	4684359	PA7_GAP	-	-	PM449_GAP	unitig_30	4683252	DEL00002182	T	<DEL>	.	PASS	IMPRECISE;SVTYPE=DEL;SVMETHOD=EMBL.DELLYv0.7.7;CHR2=unitig_30;END=4684360;PE=34;MAPQ=60;CT=3to5;CIPOS=-194,194;CIEND=-194,194	GT:GL:GQ:FT:RCL:RC:RCR:CN:DR:DV:RR:RV	1/1:-102.5,-5.41831,0:54:PASS:90:1:77:0:0:18:0:0	0/0:0,-3.61192,-68.9996:36:PASS:81:195:139:2:12:0:0:0	./.:0,0,0:0:LowQual:9:62:164:1:0:0:0:0	1/1:-193.9,-10.2349,0:102:PASS:283:0:315:0:0:34:0:0	unitig_30	4683250	1075	N	<DEL>	.	.	SVTYPE=DEL;STRANDS=+-:53;SVLEN=-1109;END=4684359;CIPOS=-10,360;CIEND=-411,9;CIPOS95=-1,170;CIEND95=-170,0;IMPRECISE;SU=53;PE=53;SR=0	GT:SU:PE:SR	./.:18:18:0	./.:0:0:0	./.:0:0:0	./.:35:35:0
unitig_30	4687593	4688436	-	DEL	-	-	843	0	0	0	0	0			unitig_30	4687593	4688436	-	PM1118_GAP	-	-	unitig_30	4687590	DEL00002183	C	<DEL>	.	PASS	PRECISE;SVTYPE=DEL;SVMETHOD=EMBL.DELLYv0.7.7;CHR2=unitig_30;END=4688437;PE=33;MAPQ=60;CT=3to5;CIPOS=-3,3;CIEND=-3,3;INSLEN=0;HOMLEN=3;SR=10;SRQ=1;CONSENSUS=TTCCGCTCTTATCATGTCGGGTTCTGCAGACGTGTGCACCATCGGATCCGGCAGCCGGAATCGCTCACACGCCGTTTAGGATTGCCATATAAGCTTAGAAATATAAGCTGACGAGCACCCGTCTTCTCAAACTTAACAACCGCAATTAACGAGTTTAGCCTCTGA;CE=1.99321	GT:GL:GQ:FT:RCL:RC:RCR:CN:DR:DV:RR:RV	0/0:0,-5.11459,-60.3971:51:PASS:63:157:77:2:38:0:17:0	1/1:-76.6965,-3.62115,0:36:PASS:113:4:77:0:0:33:1:23	0/0:0,-4.2128,-51.1984:42:PASS:212:351:54:3:30:0:14:0	0/0:0,-17.1518,-206.993:10000:PASS:204:447:267:2:98:0:57:0	unitig_30	4687592	1076	N	<DEL>	.	.	SVTYPE=DEL;STRANDS=+-:20;SVLEN=-844;END=4688436;CIPOS=-10,9;CIEND=-10,9;CIPOS95=0,0;CIEND95=0,0;SU=20;PE=0;SR=20	GT:SU:PE:SR	./.:0:0:0	./.:20:0:20	./.:0:0:0	./.:0:0:0
unitig_30	4726333	4726387	-	-	DEL	DEL	54	0	0	0	0	0			unitig_30	4726333	4726387	-	-	PM448_GAP	PM449_GAP	unitig_30	4726330	DEL00002185	CCAGTGGAGCAGCAAAAAGCTTCGTACCGAAATTTCTATTTGTAAGTGCGAGGTCTTT	C	.	PASS	PRECISE;SVTYPE=DEL;SVMETHOD=EMBL.DELLYv0.7.7;CHR2=unitig_30;END=4726388;PE=0;MAPQ=60;CT=3to5;CIPOS=-4,4;CIEND=-4,4;INSLEN=0;HOMLEN=3;SR=10;SRQ=1;CONSENSUS=TCAATAGTCTTGGCTCATTTGAAGAAAGAGATTGCATCTTGGGGTGTGTGCGGCCCAAGGCCAAGAAGAAAACATCATTACCACGCAATTGTCCTTGTGCGCTCCTTGACAGTGAGCTATCAGATACAATACACTTTGCTTTTGTCAGACGACGTGCTCC;CE=1.99573	GT:GL:GQ:FT:RCL:RC:RCR:CN:DR:DV:RR:RV	0/0:0,-4.51368,-54.7982:45:PASS:586:1159:543:2:0:0:15:0	0/0:0,-6.01795,-72.0974:60:PASS:728:1277:561:2:0:0:20:0	1/1:-68.6976,-5.71713,0:57:PASS:359:30:544:0:0:0:0:19	1/1:-347.387,-29.1869,0:10000:PASS:1729:127:2268:0:0:0:0:97	unitig_30	4726332	1077	N	<DEL>	.	.	SVTYPE=DEL;STRANDS=+-:50;SVLEN=-55;END=4726387;CIPOS=0,0;CIEND=0,0;CIPOS95=0,0;CIEND95=0,0;SU=50;PE=0;SR=50	GT:SU:PE:SR	./.:0:0:0	./.:0:0:0	./.:9:0:9	./.:41:0:41
unitig_30	4762528	4764122	-	-	DEL	-	1594	0	1	0	1	0	TM1119_g7771		unitig_30	4762528	4764122	-	-	PM448_GAP	-	unitig_30	4762659	DEL00002188	C	<DEL>	.	PASS	IMPRECISE;SVTYPE=DEL;SVMETHOD=EMBL.DELLYv0.7.7;CHR2=unitig_30;END=4764123;PE=8;MAPQ=58;CT=3to5;CIPOS=-120,120;CIEND=-120,120	GT:GL:GQ:FT:RCL:RC:RCR:CN:DR:DV:RR:RV	0/0:0,-13.5457,-260.899:135:PASS:110:262:124:2:45:0:0:0	0/0:0,-10.235,-204:102:PASS:376:341:159:1:34:0:0:0	1/1:-42.4997,-2.40791,0:24:PASS:342:4:97:0:0:8:0:0	0/0:0,-31.6081,-630:10000:PASS:352:851:342:2:105:0:0:0	unitig_30	4762657	1079	N	<DEL>	.	.	SVTYPE=DEL;STRANDS=+-:8;SVLEN=-1465;END=4764122;CIPOS=-10,302;CIEND=-424,9;CIPOS95=0,119;CIEND95=-211,0;IMPRECISE;SU=8;PE=8;SR=0	GT:SU:PE:SR	./.:0:0:0	./.:0:0:0	./.:8:8:0	./.:0:0:0
unitig_30	4801384	4803443	DEL	-	DEL	DEL	2059	1	0	0	1	0	TM1119_g7785		unitig_30	4801384	4803443	PA7_GAP	-	PM448_GAP	PM449_GAP	unitig_30	4801382	DEL00002189	G	<DEL>	.	PASS	PRECISE;SVTYPE=DEL;SVMETHOD=EMBL.DELLYv0.7.7;CHR2=unitig_30;END=4803449;PE=11;MAPQ=60;CT=3to5;CIPOS=-5,5;CIEND=-5,5;INSLEN=0;HOMLEN=5;SR=10;SRQ=0.984043;CONSENSUS=TGACTCGCGGCCAGCGAGAGATGCGGCAATTGGCTAATAAGCGGCTTGGTTTTACTGATCAGTGATCCAGGCGACCTTACCTAATGTGTCACAGCTTAGATATAGATAGCCTACATTAATCAAATACCGTAGAGCTCCTAGGAGCTATAACAGATGTGCCATCAGATGAGACGGCGTTCAACAATAAT;CE=1.99029	GT:GL:GQ:FT:RCL:RC:RCR:CN:DR:DV:RR:RV	1/1:-42.7979,-3.61022,0:36:PASS:169:0:181:0:0:35:0:12	0/0:0,-7.22113,-83.9964:72:PASS:237:528:234:2:33:0:24:0	1/1:-28.8991,-2.40731,0:24:PASS:353:0:419:0:0:11:0:8	1/1:-200.494,-16.2501,0:10000:PASS:513:0:565:0:0:78:0:54	unitig_30	4801377	1080	N	<DEL>	.	.	SVTYPE=DEL;STRANDS=+-:176;SVLEN=-2071;END=4803448;CIPOS=0,0;CIEND=0,0;CIPOS95=0,0;CIEND95=0,0;SU=176;PE=125;SR=51	GT:SU:PE:SR	./.:40:35:5	./.:0:0:0	./.:15:11:4	./.:121:79:42
unitig_30	4839662	4839868	-	-	DEL	-	206	0	0	0	0	0			unitig_30	4839662	4839868	-	-	PM448_GAP	-	unitig_30	4839658	DEL00002192	TTTGTTTGGCTTTCTAGACGAGCAGTGAAAACTTCATCGCTGGAGCAAGGAGGTTGAGGGTTGAGATAGCGCGATGGCCATCTGTGGAGCGTGGAACGTGGAAATAGCGAGCAGGGTAAGCAGGGGTCGCGTCTGTCAATTAAAACCCATGCACCCCTGAAGCCCTCCGAGGGCCTGTGCTTGGCGTCGTACGGCGCGCTCCAAAGGGGAG	T	.	PASS	PRECISE;SVTYPE=DEL;SVMETHOD=EMBL.DELLYv0.7.7;CHR2=unitig_30;END=4839869;PE=0;MAPQ=60;CT=3to5;CIPOS=-4,4;CIEND=-4,4;INSLEN=0;HOMLEN=3;SR=10;SRQ=1;CONSENSUS=AGACAGAATGAGGTCTCTCATAGAGTGCTCACAGTGGTGGCGAGATGTGAAAGGTTCACAGAGGGCGCCTTGCTTTTGGAAAACTTATGCCGGTACCAGGGCGAGCGTGTGCCAATTGGGCGATGGGCAACGCGCCGTTGGAGCATCAACGGTAAGTG;CE=1.96289	GT:GL:GQ:FT:RCL:RC:RCR:CN:DR:DV:RR:RV	0/0:0,-3.61119,-44.4988:36:PASS:1822:3400:1596:2:0:0:12:0	0/0:0,-15.9462,-185.992:157:PASS:5981:13810:8199:2:0:0:53:0	1/1:-251.491,-17.965,0:10000:PASS:7829:193:9368:0:0:0:1:71	0/0:0,-16.2468,-190.891:10000:PASS:7356:15458:6593:2:0:0:54:0	unitig_30	4839661	1081	N	<DEL>	.	.	SVTYPE=DEL;STRANDS=+-:56;SVLEN=-207;END=4839868;CIPOS=0,0;CIEND=0,0;CIPOS95=0,0;CIEND95=0,0;SU=56;PE=0;SR=56	GT:SU:PE:SR	./.:0:0:0	./.:0:0:0	./.:55:0:55	./.:0:0:0
unitig_30	4862843	4862917	-	-	-	DEL	74	0	0	1	1	0	TM1119_g7804		unitig_30	4862843	4862917	-	-	-	PM449_GAP	unitig_30	4862836	DEL00002195	ATCAACGAGATAATACAGTTTGCCATTATAGCAGCCTGCTGTTTTGTGCATCGTGTCAGTGCTCAGGTACTCGTCCTCTGGG	A	.	PASS	PRECISE;SVTYPE=DEL;SVMETHOD=EMBL.DELLYv0.7.7;CHR2=unitig_30;END=4862918;PE=0;MAPQ=60;CT=3to5;CIPOS=-7,7;CIEND=-7,7;INSLEN=0;HOMLEN=8;SR=10;SRQ=1;CONSENSUS=TGGCAGTGCCGAGAAGTCATTGTCAGTACATGTGACTGCGCAGCCATCGCAGCTGCTACAGTCCTGGGCATCGCCACTAGGATCAACGGTGCCGCAGTCGTAGCAAGAGTCAAGAATAAAGGCTCGTGTACCGGCGACGGACCATAGAGCCGGAATGGCAAATGCGAAGAAGGCT;CE=1.96978	GT:GL:GQ:FT:RCL:RC:RCR:CN:DR:DV:RR:RV	0/0:0,-3.00916,-36.3989:30:PASS:664:1486:539:2:0:0:10:0	0/0:0,-7.52311,-91.6974:75:PASS:1604:2750:1762:2:0:0:25:0	0/0:0,-13.2401,-159.995:132:PASS:3057:4513:2476:2:0:0:44:0	1/1:-208.192,-17.4519,0:10000:PASS:1714:231:2089:0:0:0:0:58	unitig_30	4862842	1082	N	<DEL>	.	.	SVTYPE=DEL;STRANDS=+-:46;SVLEN=-75;END=4862917;CIPOS=0,0;CIEND=0,0;CIPOS95=0,0;CIEND95=0,0;SU=46;PE=0;SR=46	GT:SU:PE:SR	./.:0:0:0	./.:0:0:0	./.:0:0:0	./.:46:0:46
unitig_30	4906539	4906694	-	DEL	-	-	155	0	1	0	1	0	TM1119_g7820		unitig_30	4906539	4906694	-	PM1118_GAP	-	-	unitig_30	4906538	DEL00002198	AGAGGAGTCATGACCGCACGTCTCTGATGGCAGCATCAATATGAGCCCTACGAGTGCAATGTGATGAACGGGTGGTGTGGTTAGTAGGATCAAGTACGGTCGGCGGGACTTCTTGCAGCAAGAGAGGGATAGGAGTCTTGATATTCTCTATTGACAT	A	.	PASS	PRECISE;SVTYPE=DEL;SVMETHOD=EMBL.DELLYv0.7.7;CHR2=unitig_30;END=4906695;PE=0;MAPQ=60;CT=3to5;CIPOS=-1,1;CIEND=-1,1;INSLEN=0;HOMLEN=0;SR=10;SRQ=0.972376;CONSENSUS=TGCGCGATGTCCTGAGGATTGGGCTCTCGTGTCCACATTGGGCTGGAGTTGAGTCCGCTATCATCCCAAGCAAGTCCTTCTCGGGCGACCACTCGTCATTTTGTTGGACCGTCTTGAGATGTCTTGACCAGATAGACCTTCGTTACAAACCGGACGGGATCGAGACTCGATCCCCGGGGCT;CE=1.98041	GT:GL:GQ:FT:RCL:RC:RCR:CN:DR:DV:RR:RV	0/0:0,-3.61059,-43.6982:36:PASS:1080:2756:1042:3:0:0:12:0	1/1:-95.2961,-5.42578,0:54:PASS:2379:57:2477:0:0:0:1:28	0/0:0,-14.1424,-167.994:141:PASS:4988:8247:4281:2:0:0:47:0	0/0:0,-17.1516,-206.993:10000:PASS:4891:11341:5387:2:0:0:57:0	unitig_30	4906538	1083	N	<DEL>	.	.	SVTYPE=DEL;STRANDS=+-:21;SVLEN=-156;END=4906694;CIPOS=-1,0;CIEND=-1,0;CIPOS95=0,0;CIEND95=0,0;SU=21;PE=0;SR=21	GT:SU:PE:SR	./.:0:0:0	./.:21:0:21	./.:0:0:0	./.:0:0:0
unitig_30	4922061	4922828	DEL	-	-	-	767	0	0	0	0	0			unitig_30	4922061	4922828	PA7_GAP	-	-	-	unitig_30	4922067	DEL00002200	T	<DEL>	.	PASS	IMPRECISE;SVTYPE=DEL;SVMETHOD=EMBL.DELLYv0.7.7;CHR2=unitig_30;END=4922829;PE=86;MAPQ=60;CT=3to5;CIPOS=-53,53;CIEND=-53,53	GT:GL:GQ:FT:RCL:RC:RCR:CN:DR:DV:RR:RV	1/1:-246.2,-13.245,0:132:PASS:73:0:74:0:0:44:0:0	0/0:0,-6.02059,-120:60:PASS:65:85:53:1:20:0:0:0	0/0:0,-9.63277,-189.4:96:PASS:82:152:94:2:32:0:0:0	1/1:-512.7,-25.8885,0:10000:PASS:201:0:182:0:0:86:0:0	unitig_30	4922066	1084	N	<DEL>	.	.	SVTYPE=DEL;STRANDS=+-:178;SVLEN=-762;END=4922828;CIPOS=0,0;CIEND=0,0;CIPOS95=0,0;CIEND95=0,0;SU=178;PE=130;SR=48	GT:SU:PE:SR	./.:46:44:2	./.:0:0:0	./.:0:0:0	./.:132:86:46
unitig_30	4922067	4922828	-	-	-	DEL	761	0	0	0	0	0			unitig_30	4922067	4922828	-	-	-	PM449_GAP	unitig_30	4922067	DEL00002200	T	<DEL>	.	PASS	IMPRECISE;SVTYPE=DEL;SVMETHOD=EMBL.DELLYv0.7.7;CHR2=unitig_30;END=4922829;PE=86;MAPQ=60;CT=3to5;CIPOS=-53,53;CIEND=-53,53	GT:GL:GQ:FT:RCL:RC:RCR:CN:DR:DV:RR:RV	1/1:-246.2,-13.245,0:132:PASS:73:0:74:0:0:44:0:0	0/0:0,-6.02059,-120:60:PASS:65:85:53:1:20:0:0:0	0/0:0,-9.63277,-189.4:96:PASS:82:152:94:2:32:0:0:0	1/1:-512.7,-25.8885,0:10000:PASS:201:0:182:0:0:86:0:0	unitig_30	4922066	1084	N	<DEL>	.	.	SVTYPE=DEL;STRANDS=+-:178;SVLEN=-762;END=4922828;CIPOS=0,0;CIEND=0,0;CIPOS95=0,0;CIEND95=0,0;SU=178;PE=130;SR=48	GT:SU:PE:SR	./.:46:44:2	./.:0:0:0	./.:0:0:0	./.:132:86:46
unitig_30	4924663	4924952	DEL	-	-	-	289	0	0	0	0	0			unitig_30	4924663	4924952	PA7_GAP	-	-	-	unitig_30	4924657	DEL00002201	CACTTCTTTGCACGCTATAATAGAGATTAGGCTCTCTTCACAACTAAACCGTCGACCATTCTACCGTCGAGACGCCATGCGCCTTGCCCATTTCACTGTGCTTGCACATCACTAATAATTACTTTCAGGGCCCACTCCAGCTCCTTTTGCGAGGGTCAATACACTCCTTGTACGGTGCCTATTTGAAGCGCATTCATCCTAGCAACGCATGATAACACTTTCGAATGATTCAAATATACACTACCCTTCATGCTCCTCCAGTTTGTACAGAATCTTCCTATATGATACCTCCAACT	C	.	PASS	PRECISE;SVTYPE=DEL;SVMETHOD=EMBL.DELLYv0.7.7;CHR2=unitig_30;END=4924953;PE=0;MAPQ=60;CT=3to5;CIPOS=-6,6;CIEND=-6,6;INSLEN=0;HOMLEN=6;SR=10;SRQ=0.98374;CONSENSUS=GCCATGGCGTTAATATATGAATTATCAATCCTGTCTCTCATGTCTTTCGTATCGATACCACACTTCGAGTTTCTCATCGGCCTCGGCCTTGAATGGGTTTCTAGGCTGGGTAAAATGGACATC;CE=1.97394	GT:GL:GQ:FT:RCL:RC:RCR:CN:DR:DV:RR:RV	1/1:-75.3963,-6.31794,0:63:PASS:2473:83:2542:0:0:0:0:21	0/0:0,-4.81328,-56.4968:48:PASS:2654:7298:2729:3:0:0:16:0	0/0:0,-4.51283,-51.5974:45:PASS:1627:8808:4585:3:0:0:15:0	0/0:0,-19.2597,-238.194:10000:PASS:12247:24530:11802:2:0:0:64:0	unitig_30	4924662	1085	N	<DEL>	.	.	SVTYPE=DEL;STRANDS=+-:13;SVLEN=-290;END=4924952;CIPOS=-10,9;CIEND=-10,9;CIPOS95=0,0;CIEND95=0,0;SU=13;PE=0;SR=13	GT:SU:PE:SR	./.:13:0:13	./.:0:0:0	./.:0:0:0	./.:0:0:0
unitig_30	4979827	4985866	-	-	DEL	-	6039	0	0	0	0	0			unitig_30	4979827	4985866			PM448_GAP		unitig_30	4979820	DEL00002205	G	<DEL>	.	PASS	PRECISE;SVTYPE=DEL;SVMETHOD=EMBL.DELLYv0.7.7;CHR2=unitig_30;END=4985862;PE=43;MAPQ=60;CT=3to5;CIPOS=-7,7;CIEND=-7,7;INSLEN=0;HOMLEN=7;SR=10;SRQ=0.994286;CONSENSUS=ATCTGCTAGATGTGGCGGCCTGAGCTTCGCGCTAGGGCGGTATTCGGCGAGCCTATCTGCGTCAGTCGCACGCCGCATCGCCAAGCTGGAGGGCTCTTCAATCACTCTAATTGGATCTTCAGTCTGCTAGGGACAACTCAGGTGGCCAACTACCAAATTCCGAGCACACATGACT;CE=1.98843	GT:GL:GQ:FT:RCL:RC:RCR:CN:DR:DV:RR:RV	1/1:-40.6967,-3.6091,0:36:PASS:492:111:567:0:0:47:0:12	1/1:-75.495,-6.61764,0:66:PASS:513:1672:530:3:0:43:0:22	1/1:-177.889,-15.342,0:154:PASS:789:9:876:0:0:86:0:51	1/1:-142.593,-12.034,0:120:PASS:1560:2856:1620:2:0:91:0:40	unitig_30	4979826	1087	N	<DEL>	.	.	SVTYPE=DEL;STRANDS=+-:373;SVLEN=-6035;END=4985861;CIPOS=0,0;CIEND=0,0;CIPOS95=0,0;CIEND95=0,0;SU=373;PE=271;SR=102	GT:SU:PE:SR	./.:54:47:7	./.:61:43:18	./.:129:88:41	./.:129:93:36
unitig_30	5004297	5006594	-	-	-	DEL	2297	0	0	0	0	2		TM1119_g7856;TM1119_g7857	unitig_30	5004297	5006594	-	-	-	PM449_GAP	unitig_30	5004293	DEL00002207	C	<DEL>	.	PASS	PRECISE;SVTYPE=DEL;SVMETHOD=EMBL.DELLYv0.7.7;CHR2=unitig_30;END=5006595;PE=38;MAPQ=60;CT=3to5;CIPOS=-4,4;CIEND=-4,4;INSLEN=0;HOMLEN=3;SR=10;SRQ=0.991667;CONSENSUS=AGAGAAGACACGGGAGGACAAATCAATCTCACCCTATGAAGGTGCAACGAACATCTACTCGCATCGAATGAGCTGCTGCGCTAACATCGATAATGCCAGTAAGACCAATGTTGCTGAGAG;CE=1.9631	GT:GL:GQ:FT:RCL:RC:RCR:CN:DR:DV:RR:RV	1/1:-51.7978,-4.21226,0:42:PASS:195:0:191:0:0:39:0:14	0/0:0,-7.22068,-84.996:72:PASS:211:568:135:3:27:0:24:0	1/1:-89.7968,-7.52258,0:75:PASS:342:0:94:0:0:25:0:25	1/1:-232.293,-19.2586,0:10000:PASS:623:1:671:0:0:88:0:64	unitig_30	5004296	1089	N	<DEL>	.	.	SVTYPE=DEL;STRANDS=+-:226;SVLEN=-2298;END=5006594;CIPOS=0,0;CIEND=0,0;CIPOS95=0,0;CIEND95=0,0;SU=226;PE=158;SR=68	GT:SU:PE:SR	./.:47:39:8	./.:0:0:0	./.:43:28:15	./.:136:91:45
unitig_30	5004297	5006596	DEL	-	DEL	-	2299	0	0	0	0	2		TM1119_g7856;TM1119_g7857	unitig_30	5004297	5006596	PA7_GAP	-	PM448_GAP	-	unitig_30	5004293	DEL00002207	C	<DEL>	.	PASS	PRECISE;SVTYPE=DEL;SVMETHOD=EMBL.DELLYv0.7.7;CHR2=unitig_30;END=5006595;PE=38;MAPQ=60;CT=3to5;CIPOS=-4,4;CIEND=-4,4;INSLEN=0;HOMLEN=3;SR=10;SRQ=0.991667;CONSENSUS=AGAGAAGACACGGGAGGACAAATCAATCTCACCCTATGAAGGTGCAACGAACATCTACTCGCATCGAATGAGCTGCTGCGCTAACATCGATAATGCCAGTAAGACCAATGTTGCTGAGAG;CE=1.9631	GT:GL:GQ:FT:RCL:RC:RCR:CN:DR:DV:RR:RV	1/1:-51.7978,-4.21226,0:42:PASS:195:0:191:0:0:39:0:14	0/0:0,-7.22068,-84.996:72:PASS:211:568:135:3:27:0:24:0	1/1:-89.7968,-7.52258,0:75:PASS:342:0:94:0:0:25:0:25	1/1:-232.293,-19.2586,0:10000:PASS:623:1:671:0:0:88:0:64	unitig_30	5004296	1089	N	<DEL>	.	.	SVTYPE=DEL;STRANDS=+-:226;SVLEN=-2298;END=5006594;CIPOS=0,0;CIEND=0,0;CIPOS95=0,0;CIEND95=0,0;SU=226;PE=158;SR=68	GT:SU:PE:SR	./.:47:39:8	./.:0:0:0	./.:43:28:15	./.:136:91:45
unitig_30	5291181	5291593	DEL	-	-	-	412	0	0	0	0	0			unitig_30	5291181	5291593	PA7_GAP	-	-	-	unitig_30	5291173	DEL00002233	C	<DEL>	.	PASS	PRECISE;SVTYPE=DEL;SVMETHOD=EMBL.DELLYv0.7.7;CHR2=unitig_30;END=5291594;PE=51;MAPQ=60;CT=3to5;CIPOS=-8,8;CIEND=-8,8;INSLEN=0;HOMLEN=7;SR=10;SRQ=0.975;CONSENSUS=ACTTTTTGACCTCGGTGTGAATATGAGTATCAACAGTATTCACCAACCATCTAGATACCATTTCTCATTATATTCTCGCTTAACACCTTTTAGCTTCAATTTCGCATTGCTTCCCCTTCA;CE=1.88651	GT:GL:GQ:FT:RCL:RC:RCR:CN:DR:DV:RR:RV	1/1:-48.8988,-3.91216,0:39:PASS:4189:124:3642:0:0:52:0:13	0/0:0,-2.10643,-25.4992:21:PASS:3942:6809:3222:2:20:0:7:0	0/0:0,-1.80564,-22.4995:18:PASS:1614:6414:4529:2:8:0:6:0	0/0:0,-11.7354,-140.795:117:PASS:13501:37835:20484:2:107:1:39:0	unitig_30	5291180	1108	N	<DEL>	.	.	SVTYPE=DEL;STRANDS=+-:49;SVLEN=-413;END=5291593;CIPOS=-3,3;CIEND=-4,3;CIPOS95=0,0;CIEND95=0,0;SU=49;PE=42;SR=7	GT:SU:PE:SR	./.:49:42:7	./.:0:0:0	./.:0:0:0	./.:0:0:0
unitig_32	143325	143871	DEL	DEL	-	DEL	546	0	0	0	0	0			unitig_32	143325	143871	PA7_GAP	PM1118_GAP	-	PM449_GAP	unitig_32	143321	DEL00003773	G	<DEL>	.	PASS	PRECISE;SVTYPE=DEL;SVMETHOD=EMBL.DELLYv0.7.7;CHR2=unitig_32;END=143872;PE=88;MAPQ=60;CT=3to5;CIPOS=-5,5;CIEND=-5,5;INSLEN=0;HOMLEN=4;SR=10;SRQ=0.981595;CONSENSUS=GACTCCAACACCAACAGGAGGTCTTGGATCGAGTCGATCTCAAATCAATCTTCTTGGTGATAATCGCGAGAGCAACATGGGCAAGAAGGAGAACACTTGAGTAGACTATGTTCGCATATGATTGAAAAGGAAATGAAAGGGAAATGAATAGGCATGACCAAA;CE=1.93773	GT:GL:GQ:FT:RCL:RC:RCR:CN:DR:DV:RR:RV	1/1:-48.0986,-3.91198,0:39:PASS:54:0:64:0:0:40:0:13	1/1:-44.8989,-3.61127,0:36:PASS:34:0:16:0:0:12:0:12	0/0:0,-2.70822,-32.699:27:PASS:49:30:15:1:7:0:9:0	1/1:-218.494,-17.7548,0:10000:PASS:156:0:161:0:0:88:0:59	unitig_32	143324	1722	N	<DEL>	.	.	SVTYPE=DEL;STRANDS=+-:192;SVLEN=-547;END=143871;CIPOS=0,0;CIEND=0,0;CIPOS95=0,0;CIEND95=0,0;SU=192;PE=134;SR=58	GT:SU:PE:SR	./.:46:40:6	./.:19:11:8	./.:0:0:0	./.:127:83:44
unitig_32	150763	152799	-	DEL	-	DEL	2036	0	0	0	0	1		TM1119_g14120	unitig_32	150763	152799	-	PM1118_GAP	-	PM449_GAP	unitig_32	150757	DEL00003775	T	<DEL>	.	PASS	IMPRECISE;SVTYPE=DEL;SVMETHOD=EMBL.DELLYv0.7.7;CHR2=unitig_32;END=152800;PE=83;MAPQ=60;CT=3to5;CIPOS=-50,50;CIEND=-50,50	GT:GL:GQ:FT:RCL:RC:RCR:CN:DR:DV:RR:RV	0/0:0,-15.3501,-277.798:154:PASS:207:413:205:2:51:0:0:0	1/1:-74.2998,-3.91321,0:39:PASS:154:4:99:0:0:13:0:0	0/0:0,-8.1278,-161.3:81:PASS:214:883:146:5:27:0:0:0	1/1:-492.3,-24.9853,0:10000:PASS:439:0:497:0:0:83:0:0	unitig_32	150755	1724	N	<DEL>	.	.	SVTYPE=DEL;STRANDS=+-:132;SVLEN=-2043;END=152798;CIPOS=-3,9;CIEND=0,0;CIPOS95=0,0;CIEND95=0,1;IMPRECISE;SU=132;PE=106;SR=26	GT:SU:PE:SR	./.:0:0:0	./.:18:13:5	./.:0:0:0	./.:114:93:21
unitig_32	174859	176136	-	-	DEL	-	1277	0	0	0	0	1		TM1119_g14128	unitig_32	174859	176136	-	-	PM448_GAP	-	unitig_32	174840	DEL00003780	A	<DEL>	.	PASS	IMPRECISE;SVTYPE=DEL;SVMETHOD=EMBL.DELLYv0.7.7;CHR2=unitig_32;END=176142;PE=17;MAPQ=60;CT=3to5;CIPOS=-90,90;CIEND=-90,90	GT:GL:GQ:FT:RCL:RC:RCR:CN:DR:DV:RR:RV	0/0:0,-15.0492,-291.298:150:PASS:140:260:145:2:50:0:0:0	0/0:0,-6.92368,-138:69:PASS:99:130:144:1:23:0:0:0	1/1:-91.4997,-5.11719,0:51:PASS:106:0:50:0:0:17:0:0	./.:0,0,0:0:LowQual:430:105:0:0:0:0:0:0	unitig_32	174841	1726	N	<DEL>	.	.	SVTYPE=DEL;STRANDS=+-:30;SVLEN=-1300;END=176141;CIPOS=-3,2;CIEND=-10,9;CIPOS95=0,0;CIEND95=0,0;SU=30;PE=17;SR=13	GT:SU:PE:SR	./.:0:0:0	./.:0:0:0	./.:30:17:13	./.:0:0:0
unitig_32	175006	177690	-	-	-	DEL	2684	1	0	0	1	1	TM1119_g14129	TM1119_g14128	unitig_32	175006	177690	-	-	-	PM449_GAP	unitig_32	175002	DEL00003781	C	<DEL>	.	PASS	PRECISE;SVTYPE=DEL;SVMETHOD=EMBL.DELLYv0.7.7;CHR2=unitig_32;END=177691;PE=96;MAPQ=60;CT=3to5;CIPOS=-5,5;CIEND=-5,5;INSLEN=0;HOMLEN=4;SR=10;SRQ=0.97561;CONSENSUS=CCAAATAAAGGCCCAGAGGATGGGCCTTTTTATGCGAATCCGAAGCGGCAGAAACATTCCACAATCCCTGATACATTACTTTGAGTGACCTGTCAGCAATTTTTGTGAAGGAATTTTCACGTCAGAGTTGTATCGAGTAGATACCCATAATAAGATTCCAAAGT;CE=1.97593	GT:GL:GQ:FT:RCL:RC:RCR:CN:DR:DV:RR:RV	0/0:0,-4.51285,-53.8974:45:PASS:273:598:287:2:47:0:15:0	0/0:0,-4.81473,-58.3982:48:PASS:184:423:201:2:20:0:16:0	./.:0,0,0:0:LowQual:176:50:1:1:0:0:0:0	1/1:-245.191,-20.4606,0:10000:PASS:847:0:693:0:0:97:0:68	unitig_32	175005	1727	N	<DEL>	.	.	SVTYPE=DEL;STRANDS=+-:147;SVLEN=-2685;END=177690;CIPOS=0,0;CIEND=0,0;CIPOS95=0,0;CIEND95=0,0;SU=147;PE=98;SR=49	GT:SU:PE:SR	./.:0:0:0	./.:0:0:0	./.:0:0:0	./.:147:98:49
unitig_32	204969	205282	-	-	-	DEL	313	0	0	0	0	0			unitig_32	204969	205282	-	-	-	PM449_GAP	unitig_32	204971	DEL00003785	G	<DEL>	.	PASS	PRECISE;SVTYPE=DEL;SVMETHOD=EMBL.DELLYv0.7.7;CHR2=unitig_32;END=205283;PE=75;MAPQ=60;CT=3to5;CIPOS=-3,3;CIEND=-3,3;INSLEN=0;HOMLEN=2;SR=10;SRQ=0.95858;CONSENSUS=TTGCTGTGCACACTGGGTATGATACCACTTACACGTCCCAGGCAAACAATGCGCACCACATTCTTTTCCTCAATTCATTTTCGAGGGTTTCTTCGATGTCCTCAGTGAGATATTGGGTAGAGTTGGCGCAGATCCGTAGTATGAGGCAAGCAAAGGCAAGAATGGTT;CE=1.99477	GT:GL:GQ:FT:RCL:RC:RCR:CN:DR:DV:RR:RV	0/0:0,-2.70854,-33.9993:27:PASS:3511:5786:3510:2:38:0:9:0	0/0:0,-2.40769,-30.5994:24:PASS:2846:7248:2805:3:22:0:8:0	0/0:0,-2.1057,-24.5985:21:PASS:4572:8849:2633:2:9:0:7:0	1/1:-264.291,-21.9666,0:10000:PASS:10285:195:12896:0:1:74:0:73	unitig_32	204968	1729	N	<DEL>	.	.	SVTYPE=DEL;STRANDS=+-:48;SVLEN=-314;END=205282;CIPOS=0,0;CIEND=0,0;CIPOS95=0,0;CIEND95=0,0;SU=48;PE=1;SR=47	GT:SU:PE:SR	./.:0:0:0	./.:0:0:0	./.:0:0:0	./.:48:1:47
unitig_32	229343	229616	-	DEL	-	-	273	0	0	0	0	0			unitig_32	229343	229616	-	PM1118_GAP	-	-	unitig_32	229339	DEL00003787	C	<DEL>	.	PASS	PRECISE;SVTYPE=DEL;SVMETHOD=EMBL.DELLYv0.7.7;CHR2=unitig_32;END=229617;PE=5;MAPQ=60;CT=3to5;CIPOS=-4,4;CIEND=-4,4;INSLEN=0;HOMLEN=5;SR=10;SRQ=0.979058;CONSENSUS=GCTCGTTGGTTCGATCATGTGTGTGGTAGCTCGCGTTGTTTTAATCTTTTGTCTTCTCGGTAGTTCTGGCTGTACCTGGACGATGTCGTCCATGACAGGATATAGGTTGTGATTATTTAACGTCTGACTATAAACATTGCTGTAGAAAACAGAGCACAATGTCCATATTAGGAGTACCCCTGCCGTATAGT;CE=1.96177	GT:GL:GQ:FT:RCL:RC:RCR:CN:DR:DV:RR:RV	0/0:0,-2.70786,-32.5986:27:PASS:2415:4602:2509:2:36:0:9:0	1/1:-78.0968,-6.61951,0:66:PASS:1965:41:2622:0:0:5:0:22	0/0:0,-4.81415,-56.6977:48:PASS:2383:4464:1629:2:14:0:16:0	0/0:0,-18.6572,-228.193:10000:PASS:12012:22426:12780:2:83:0:62:0	unitig_32	229342	1731	N	<DEL>	.	.	SVTYPE=DEL;STRANDS=+-:19;SVLEN=-274;END=229616;CIPOS=-1,0;CIEND=-1,0;CIPOS95=0,0;CIEND95=0,0;SU=19;PE=0;SR=19	GT:SU:PE:SR	./.:0:0:0	./.:19:0:19	./.:0:0:0	./.:0:0:0
unitig_32	350617	350903	-	-	-	DEL	286	0	0	0	0	0			unitig_32	350617	350903	-	-	-	PM449_GAP	unitig_32	350616	DEL00003799	TTTACCCAAAGTCCCCTAGACGGTAGCGATTTACTACGCGATGGGAGCATGAGTATCTCAAAACAAAAACCATTTGTTGTCAAGGTATCAGAATTGCAAAAGTCACTTCTATCTTATGAGGCATTATGTGAGCGTATGTGGTAAGTGTCAAAAGCTCACGCTTATTCATATAGATACACAGTGATCAGCCTCAATCTCTGTGTCTCGCTACTCAATGGCAAGTTAAGTACCATCACGAGTTACTACCTTAGCCTTCTGTGATCTTTGTAAGACTCTTAATG	T	.	PASS	PRECISE;SVTYPE=DEL;SVMETHOD=EMBL.DELLYv0.7.7;CHR2=unitig_32;END=350897;PE=0;MAPQ=60;CT=3to5;CIPOS=-3,3;CIEND=-3,3;INSLEN=0;HOMLEN=2;SR=10;SRQ=0.975758;CONSENSUS=CGTGATAGAGCTGCTAGCGGCTAATAGAGTCTAGATTTTCAACCTTGGAGAGGCTCAGATGGAGTCGATACTTGAAATCAATGATCTGGCCGTACTCTCCAAAGCTAGCATATTGTTGCGGGAGATATGCTTCGATATGTGAATCCGTTAAGAGGTAGCAGGT;CE=1.9784	GT:GL:GQ:FT:RCL:RC:RCR:CN:DR:DV:RR:RV	0/0:0,-4.51208,-54.2966:45:PASS:3337:8067:3244:2:0:0:15:0	0/1:-1.59421,0,-17.194:16:PASS:1676:3427:1124:2:0:0:5:1	0/0:0,-1.20358,-14.2995:12:LowQual:369:1359:332:4:0:0:4:0	1/1:-278.891,-22.8692,0:10000:PASS:11762:0:9082:0:0:0:0:76	unitig_32	350616	1735	N	<DEL>	.	.	SVTYPE=DEL;STRANDS=+-:46;SVLEN=-287;END=350903;CIPOS=0,0;CIEND=0,0;CIPOS95=0,0;CIEND95=0,0;SU=46;PE=1;SR=45	GT:SU:PE:SR	./.:0:0:0	./.:1:0:1	./.:0:0:0	./.:45:1:44
unitig_32	359273	359385	-	DEL	-	-	112	0	0	0	0	0			unitig_32	359273	359385	-	PM1118_GAP	-	-	unitig_32	359272	DEL00003801	CTCAACCATCTCTTGTCTAGAATGTTCTAATTCAGCATCGTCAATGGCCGGAGGCATTAAGGTGTTACCGCTAGCCATAATTGACACAAGGCCTGATTAGGTTGCGATCGATAG	C	.	PASS	PRECISE;SVTYPE=DEL;SVMETHOD=EMBL.DELLYv0.7.7;CHR2=unitig_32;END=359386;PE=0;MAPQ=60;CT=3to5;CIPOS=-2,2;CIEND=-2,2;INSLEN=0;HOMLEN=1;SR=10;SRQ=1;CONSENSUS=CTTCTTATAGAGCTCTGCGGGGATGTTGTGGACAGCTGGAGACCGCCGAGATTCGCGTTCCGCTTCCTCATTACGATCTTCCATAAATATATAAATGACATCGCTTTGCCAAACTAGTTGAAAATAGAGAGGTGCAAGACGAAACAGACAAGCCCGAACAATTTCGCGTC;CE=1.99406	GT:GL:GQ:FT:RCL:RC:RCR:CN:DR:DV:RR:RV	0/0:0,-5.1152,-61.1977:51:PASS:1077:2900:1437:2:0:0:17:0	1/1:-95.5963,-5.02608,0:50:PASS:1911:37:1074:0:0:0:1:28	0/0:0,-6.31878,-73.9971:63:PASS:1387:2603:2094:1:0:0:21:0	0/0:0,-21.063,-252.491:10000:PASS:4526:10261:5066:2:0:0:70:0	unitig_32	359272	1736	N	<DEL>	.	.	SVTYPE=DEL;STRANDS=+-:18;SVLEN=-113;END=359385;CIPOS=-2,1;CIEND=-2,1;CIPOS95=0,0;CIEND95=0,0;SU=18;PE=0;SR=18	GT:SU:PE:SR	./.:0:0:0	./.:18:0:18	./.:0:0:0	./.:0:0:0
unitig_32	416230	416458	-	-	-	DEL	228	0	0	1	1	0	TM1119_g14195		unitig_32	416230	416458	-	-	-	PM449_GAP	unitig_32	416224	DEL00003812	GTCTTTCTAAATGGGTTTGGCCTAATGGCCCGTTTCCTGCCGTATCTAATGTCGCCTTTGCGGTAAGAAATTCCCTGACCTCTGATGTACTGTGGGTAAGCACAACTGAACTTCGAACAGCCCGTGGAATGGGTTAGACGAGACAACAATCTTAAGTTCTTCAGAAAGCATAAGACAGGAGGTCATTTTCCTGCCATAACCTGTCCAGAGTTGTGGCTTGAAGATATTAGGGAGT	G	.	PASS	PRECISE;SVTYPE=DEL;SVMETHOD=EMBL.DELLYv0.7.7;CHR2=unitig_32;END=416459;PE=0;MAPQ=60;CT=3to5;CIPOS=-7,7;CIEND=-7,7;INSLEN=0;HOMLEN=7;SR=10;SRQ=0.98773;CONSENSUS=ACCAATCAATCGAATGCTATGATACTGACGACCGTCAAGCCAGAAATCGGGAATTCCCCAGAACAGAAGTTCCATTCGGTCTTTGCCACTGTGTTGTCATTGAAAATTAAACGTAGCTTAGCTATCTATAGCTTCAACATGTGACATGGGTCTGCAATTGAG;CE=1.98233	GT:GL:GQ:FT:RCL:RC:RCR:CN:DR:DV:RR:RV	0/0:0,-3.60715,-39.7948:36:PASS:2229:4664:2238:2:0:0:12:0	0/0:0,-3.31037,-41.399:33:PASS:2537:3254:1916:1:0:0:11:0	0/0:0,-2.40261,-24.5944:24:PASS:1270:5100:1445:4:0:0:8:0	1/1:-251.192,-20.7632,0:10000:PASS:7021:255:7672:0:0:0:0:69	unitig_32	416229	1741	N	<DEL>	.	.	SVTYPE=DEL;STRANDS=+-:52;SVLEN=-229;END=416458;CIPOS=0,0;CIEND=0,0;CIPOS95=0,0;CIEND95=0,0;SU=52;PE=0;SR=52	GT:SU:PE:SR	./.:0:0:0	./.:0:0:0	./.:0:0:0	./.:52:0:52
unitig_32	420892	421068	-	DEL	-	-	176	0	1	0	1	0	TM1119_g14196		unitig_32	420892	421068	-	PM1118_GAP	-	-	unitig_32	420884	DEL00003813	CCGCCTCTTTCTGCCAACCAAGACGTTAAGAGGAGACGTCTCTGAATCGAGCGTATCCTGCCTAACAATCTAACATACCTCATGGGGAGCTGTTCCACACATACCTCGCGAGGGCGCCGCTGGAACGACCAGAACTTCTGCCCCGCCTCTCGTGCAGGAGAACCGAGGCAGGATCGAGACCAAAGAGAGGT	C	.	PASS	PRECISE;SVTYPE=DEL;SVMETHOD=EMBL.DELLYv0.7.7;CHR2=unitig_32;END=421075;PE=0;MAPQ=60;CT=3to5;CIPOS=-9,9;CIEND=-9,9;INSLEN=0;HOMLEN=13;SR=10;SRQ=0.993789;CONSENSUS=AGGATCGTGATCGCCGCGGCATTGTCGAAGGGGGGGCATCTAGACCGCGCTATAGGAGTATTATCGCCGAGCAAGAGGGAGAGTAGTCTCAAGAGGCCGCCTCTCTGGAGACGGGAGCTCGATAGGGCTCGCCGCGCTGCCATTTGTCTCCGCGAAAGGGT;CE=1.9501	GT:GL:GQ:FT:RCL:RC:RCR:CN:DR:DV:RR:RV	0/0:0,-3.30991,-39.4986:33:PASS:1929:4167:1566:2:0:0:11:0	1/1:-131.794,-8.73478,0:87:PASS:3952:439:3911:0:0:0:1:39	0/0:0,-21.0609,-243.889:10000:PASS:7382:13990:10659:2:0:0:70:0	0/0:0,-12.9368,-150.092:129:PASS:6755:10976:5602:2:0:0:43:0	unitig_32	420891	1742	N	<DEL>	.	.	SVTYPE=DEL;STRANDS=+-:31;SVLEN=-177;END=421068;CIPOS=-1,0;CIEND=-1,0;CIPOS95=0,0;CIEND95=0,0;SU=31;PE=0;SR=31	GT:SU:PE:SR	./.:0:0:0	./.:31:0:31	./.:0:0:0	./.:0:0:0
unitig_32	463929	464131	DEL	-	-	-	202	0	0	0	0	0			unitig_32	463929	464131	PA7_GAP	-	-	-	unitig_32	463923	DEL00003821	GACCTGTGTTGTGGGAATGGATGGCTTACATAAGGCTGCCGCTAGCTCATACTTAGCTCACCTTCCCTCACACTTACATAGCTTTCCCTAGAACAACCAATATATCACGAATGCACAGCACAGCAAATTGAAGCCTACGTACAGCGTAGCCGGTATCAGTCCGTGAGCCCATATCATACCTTACGTCCGTCCCGGACGTAGGCCTTACA	G	.	PASS	PRECISE;SVTYPE=DEL;SVMETHOD=EMBL.DELLYv0.7.7;CHR2=unitig_32;END=464132;PE=0;MAPQ=60;CT=3to5;CIPOS=-8,8;CIEND=-8,8;INSLEN=0;HOMLEN=8;SR=10;SRQ=0.992308;CONSENSUS=TTTGACCAAAGCTCGCCGCCGAAGACGTATGGGAGTGTAAGAAGACCTGAGTGGGGAAGGCTGGGTTAGTTCTATTCAAGATAAGACCTCTGCTGTCATGAACGTCGTGGGAGAGACTCACCGACTAAAT;CE=1.98128	GT:GL:GQ:FT:RCL:RC:RCR:CN:DR:DV:RR:RV	1/1:-39.2986,-3.30997,0:33:PASS:1107:2163:1988:1:0:0:0:11	1/1:-77.2967,-6.61935,0:66:PASS:2994:5213:2681:2:0:0:0:22	1/1:-112.495,-9.62823,0:96:PASS:3953:7550:5397:2:0:0:0:32	1/1:-197.39,-16.848,0:10000:PASS:5126:21489:7693:3:0:0:0:56	unitig_32	463928	1744	N	<DEL>	.	.	SVTYPE=DEL;STRANDS=+-:100;SVLEN=-203;END=464131;CIPOS=0,0;CIEND=0,0;CIPOS95=0,0;CIEND95=0,0;SU=100;PE=1;SR=99	GT:SU:PE:SR	./.:8:0:8	./.:18:0:18	./.:26:1:25	./.:47:0:47
unitig_32	542100	543032	DEL	DEL	-	-	932	0	0	0	0	0			unitig_32	542100	543032	PA7_GAP	PM1118_GAP	-	-	unitig_32	542097	DEL00003828	G	<DEL>	.	PASS	PRECISE;SVTYPE=DEL;SVMETHOD=EMBL.DELLYv0.7.7;CHR2=unitig_32;END=543033;PE=19;MAPQ=60;CT=3to5;CIPOS=-5,5;CIEND=-5,5;INSLEN=0;HOMLEN=4;SR=10;SRQ=1;CONSENSUS=ATGTGTAATCGAGCCTAAAGAGGCACGCGCTGGAATTGCTCTTGAAAAGTTCATGGCTACTATTGAAAAGGGGAAGTGCTTCAAGGGCATTCTTGGTATTGTAGCCCGAGAATCCCCTGTTTACCACATCAAAATAACGCAAGACAGCTAGGACTGTGGGTGAGTGA;CE=1.98302	GT:GL:GQ:FT:RCL:RC:RCR:CN:DR:DV:RR:RV	1/1:-61.197,-5.11455,0:51:PASS:102:0:108:0:0:41:0:17	1/1:-58.8964,-5.11389,0:51:PASS:80:0:70:0:0:19:0:17	0/0:0,-8.1248,-98.297:81:PASS:163:180:120:1:30:0:27:0	0/0:0,-17.4529,-210.593:10000:PASS:267:510:233:2:110:0:58:0	unitig_32	542099	1747	N	<DEL>	.	.	SVTYPE=DEL;STRANDS=+-:82;SVLEN=-933;END=543032;CIPOS=-2,0;CIEND=-10,9;CIPOS95=0,0;CIEND95=0,0;SU=82;PE=60;SR=22	GT:SU:PE:SR	./.:50:41:9	./.:32:19:13	./.:0:0:0	./.:0:0:0
unitig_32	546226	546439	-	DEL	-	-	213	0	0	0	0	0			unitig_32	546226	546439	-	PM1118_GAP	-	-	unitig_32	546220	DEL00003830	CGCAAGTGTAAGCTCACGTCCGGTAGATGGGATAGGATCACGGGCTTTGACCGGCTACGCTTCACGTAGGCTTCACGAAACTGTGCTGTGCATTTCTTCTGTATTGTTGTTCTCTCGCAAAGCTATGTCTCTCTGAGAAGTGGTGAGCTAAGTAAGAGCTAGTGTGGGGCCAGTGAAAGGCTTATGTAAGCTATGTCCTCATCCGTCCGTCCTCACAACA	C	.	PASS	PRECISE;SVTYPE=DEL;SVMETHOD=EMBL.DELLYv0.7.7;CHR2=unitig_32;END=546440;PE=0;MAPQ=60;CT=3to5;CIPOS=-6,6;CIEND=-6,6;INSLEN=0;HOMLEN=5;SR=10;SRQ=0.982456;CONSENSUS=ACAATTGGCCCCTTCCTATCCCAGCATAATCCCCAGTCCGAGCAACTCAACTCGCTAGTGTAACTACTCACAGCTTCCTGCGCAAGCCAGACAACCTCGATTAAACTTCAGCCAAGGTCCACTCAATATCCCGACAGATAACATCATGGTCCGATATCAACATGACGCCGG;CE=1.93729	GT:GL:GQ:FT:RCL:RC:RCR:CN:DR:DV:RR:RV	0/0:0,-4.51338,-52.9979:45:PASS:1477:11330:2476:6:0:0:15:0	1/1:-88.8974,-7.22208,0:72:PASS:2845:105:2331:0:0:0:0:24	0/0:0,-5.41648,-65.8979:54:PASS:3536:23611:2616:8:0:0:18:0	1/1:-211.992,-17.7532,0:10000:PASS:4831:16024:9275:2:0:0:0:59	unitig_32	546225	1754	N	<DEL>	.	.	SVTYPE=DEL;STRANDS=+-:39;SVLEN=-214;END=546439;CIPOS=0,0;CIEND=0,0;CIPOS95=0,0;CIEND95=0,0;SU=39;PE=0;SR=39	GT:SU:PE:SR	./.:0:0:0	./.:13:0:13	./.:0:0:0	./.:26:0:26
unitig_32	597084	597182	-	-	-	DEL	98	0	0	0	0	0			unitig_32	597084	597182	-	-	-	PM449_GAP	unitig_32	597083	DEL00003835	CCGTAAACAAGATATAGACAAACGCTATCTGATATGGACTCTTCAAGAGAAATTGTTCCCCTCGCTAATAAGCCGCAAAATATCCCCCTGT	C	.	PASS	PRECISE;SVTYPE=DEL;SVMETHOD=EMBL.DELLYv0.7.7;CHR2=unitig_32;END=597174;PE=0;MAPQ=60;CT=3to5;CIPOS=-2,2;CIEND=-2,2;INSLEN=0;HOMLEN=2;SR=10;SRQ=0.957317;CONSENSUS=AGCGACTGTGCGGTGTGGTACAGGTGACAGATTAGTCGGACTGGGTATTGATTGGGATTGTATCTGATATGTACAGCACATTACAAAAGACATACCTTATAATGCCAAGCACAGCCTTATCATTCAACGAACTAGTCGTGGTCGCAAAGTTACACCACCCTG;CE=1.99017	GT:GL:GQ:FT:RCL:RC:RCR:CN:DR:DV:RR:RV	0/0:0,-3.60977,-42.5974:36:PASS:692:2031:1100:2:0:0:12:0	0/0:0,-3.91163,-46.0982:39:PASS:669:1435:1315:1:0:0:13:0	0/0:0,-4.5141,-56.0987:45:PASS:1534:2902:2340:1:0:0:15:0	1/1:-240.893,-19.8606,0:10000:PASS:2267:0:1978:0:0:0:0:66	unitig_32	597078	1758	N	<DEL>	.	.	SVTYPE=DEL;STRANDS=+-:46;SVLEN=-104;END=597182;CIPOS=0,0;CIEND=0,0;CIPOS95=0,0;CIEND95=0,0;SU=46;PE=0;SR=46	GT:SU:PE:SR	./.:0:0:0	./.:0:0:0	./.:0:0:0	./.:46:0:46
unitig_32	613440	613542	-	-	-	DEL	102	0	0	0	0	0			unitig_32	613440	613542	-	-	-	PM449_GAP	unitig_32	613433	DEL00003837	GTTCTCAGGATAACAAGCCTCTCGGTAGCACTAATGGTTATGCATGTTAGAACCAGAAAGAGAACTCATCGTTGAGAACAGTTTACTGTGAAAAGAGACACGGTATTGTA	G	.	PASS	PRECISE;SVTYPE=DEL;SVMETHOD=EMBL.DELLYv0.7.7;CHR2=unitig_32;END=613543;PE=0;MAPQ=60;CT=3to5;CIPOS=-5,5;CIEND=-5,5;INSLEN=0;HOMLEN=5;SR=10;SRQ=0.965318;CONSENSUS=GCTATTCTGTCGAAGGTTTTGTCACGGATGAGGTTTGCTATTTGGAGAGCTATGAATCGAATATTGAGTGAAGGGAGGTAATGATTATGTCTCATTGTATATCTTACGGTGTGTTGGACAGAGTGATCTGGGCCGAATCTGATCAAACAAATGCATGATAAACCACAGCCTCG;CE=1.95531	GT:GL:GQ:FT:RCL:RC:RCR:CN:DR:DV:RR:RV	0/0:0,-2.10596,-25.0988:21:PASS:1059:1471:1529:1:0:0:7:0	0/0:0,-0.902811,-11.0997:10:LowQual:534:1046:605:2:0:0:3:0	0/0:0,-0.60193,-7.69987:7:LowQual:191:385:291:2:0:0:2:0	1/1:-215.795,-17.4542,0:10000:PASS:3236:43:3368:0:0:0:0:58	unitig_32	613431	1759	N	<DEL>	.	.	SVTYPE=DEL;STRANDS=+-:30;SVLEN=-111;END=613542;CIPOS=-1,0;CIEND=-1,0;CIPOS95=0,0;CIEND95=0,0;SU=30;PE=0;SR=30	GT:SU:PE:SR	./.:0:0:0	./.:0:0:0	./.:0:0:0	./.:30:0:30
unitig_32	664934	665161	DEL	-	-	-	227	0	0	0	0	0			unitig_32	664934	665161	PA7_GAP	-	-	-	unitig_32	664929	DEL00003839	TCCAGTGAAACAGGGCAGCAGTGCCTACTGCTGACCAACATCCTCTCAAGATATCACATAGCACAAACACAAAAAGAAGCCTCCTGGGCAAAAAGAACGTATTAGAATGAATGGGTTGTCATTCTTGTATTCGTATGTAATAATTGCTAAGTGAAGCGAGTAAAAATGAAGTTAGTAATAGCAAATAAGTCACCTGACTGCTGGCAGGGGTAAGACCATGCTCCCCCAACTCA	T	.	PASS	PRECISE;SVTYPE=DEL;SVMETHOD=EMBL.DELLYv0.7.7;CHR2=unitig_32;END=665162;PE=0;MAPQ=60;CT=3to5;CIPOS=-7,7;CIEND=-7,7;INSLEN=0;HOMLEN=6;SR=10;SRQ=0.961538;CONSENSUS=ACAGAAATAAATAAGCGTCCGCGGCGGTAAACGAATTTCCCATTGCGTAGGTTGTTCCAGCTGCTGCATTTTTGCTCTCTATCAACGTAAAGCTCTGTTGGAGATTCTCGAGCGCTTTGTCTCGAATGGC;CE=1.99064	GT:GL:GQ:FT:RCL:RC:RCR:CN:DR:DV:RR:RV	1/1:-54.6965,-4.81293,0:48:PASS:2367:122:2551:0:0:0:0:16	0/0:0,-5.71701,-68.1974:57:PASS:3961:4724:3991:1:0:0:19:0	0/0:0,-6.61819,-76.5955:66:PASS:4816:4962:4464:1:0:0:22:0	0/0:0,-18.3541,-219.091:10000:PASS:8884:19522:9593:2:0:0:61:0	unitig_32	664933	1760	N	<DEL>	.	.	SVTYPE=DEL;STRANDS=+-:4;SVLEN=-228;END=665161;CIPOS=-9,8;CIEND=-9,8;CIPOS95=0,0;CIEND95=0,0;SU=4;PE=0;SR=4	GT:SU:PE:SR	./.:4:0:4	./.:0:0:0	./.:0:0:0	./.:0:0:0
unitig_32	691477	691595	DEL	-	-	-	118	0	0	1	1	0	TM1119_g14288		unitig_32	691477	691595	PA7_GAP	-	-	-	unitig_32	691466	DEL00003840	GGCAGCCACCAGCCTCAACCTCAGCCTAGTCGTCGGCATCGGCGTCTCCACCGAGCGCGACAGCGTCTTCCAACTCCTCAAGGATGGCGGCCTGTTGCCCATGAACGAGACAGATGTGCTGAACCTCGTC	G	.	PASS	PRECISE;SVTYPE=DEL;SVMETHOD=EMBL.DELLYv0.7.7;CHR2=unitig_32;END=691596;PE=0;MAPQ=60;CT=3to5;CIPOS=-6,6;CIEND=-6,6;INSLEN=0;HOMLEN=6;SR=10;SRQ=1;CONSENSUS=ATGCTGGAAACAGCTACCAGGATGCCCTCATGCACCACCGTGCCGCCTCGGGCCTGGCGGCCGCCATCTCCGGACGCGCTCCGACCCAGATTGCCGTCGGCACGGCCACTGGTGGCC;CE=1.8692	GT:GL:GQ:FT:RCL:RC:RCR:CN:DR:DV:RR:RV	1/1:-54.5942,-5.11171,0:51:PASS:1428:45:1180:0:0:0:0:17	0/0:0,-0.300685,-3.09965:5:LowQual:115:64:0:1:0:0:1:0	0/0:0,-25.2709,-289.684:10000:PASS:6454:14925:7603:2:0:0:84:0	0/0:0,-13.5382,-156.792:135:PASS:3451:7754:4224:2:0:0:45:0	unitig_32	691468	1762	N	<DEL>	.	.	SVTYPE=DEL;STRANDS=+-:10;SVLEN=-127;END=691595;CIPOS=-10,9;CIEND=-10,9;CIPOS95=0,0;CIEND95=0,0;SU=10;PE=0;SR=10	GT:SU:PE:SR	./.:10:0:10	./.:0:0:0	./.:0:0:0	./.:0:0:0
unitig_32	745163	750795	-	-	DEL	-	5632	0	0	0	0	1		TM1119_g14308	unitig_32	745163	750795	-	-	PM448_GAP	-	unitig_32	745163	DEL00003845	C	<DEL>	.	PASS	IMPRECISE;SVTYPE=DEL;SVMETHOD=EMBL.DELLYv0.7.7;CHR2=unitig_32;END=750796;PE=17;MAPQ=60;CT=3to5;CIPOS=-50,50;CIEND=-50,50	GT:GL:GQ:FT:RCL:RC:RCR:CN:DR:DV:RR:RV	0/0:0,-17.7597,-342.999:10000:PASS:661:1247:645:2:59:0:0:0	0/0:0,-7.2247,-142.5:72:PASS:511:695:444:1:24:0:0:0	1/1:-101.1,-5.1175,0:51:PASS:846:1:532:0:0:17:0:0	0/0:0,-43.9503,-876:10000:PASS:1404:3204:1631:2:146:0:0:0	unitig_32	745162	1764	N	<DEL>	.	.	SVTYPE=DEL;STRANDS=+-:25;SVLEN=-5633;END=750795;CIPOS=-10,9;CIEND=-5,1;CIPOS95=0,0;CIEND95=0,0;SU=25;PE=18;SR=7	GT:SU:PE:SR	./.:0:0:0	./.:0:0:0	./.:25:18:7	./.:0:0:0
unitig_32	782918	783188	-	-	DEL	DEL	270	0	0	1	1	0	TM1119_g14320		unitig_32	782918	783188	-	-	PM448_GAP	PM449_GAP	unitig_32	782917	DEL00003851	ATATATTGACAGCATCCTCATTGCCCGTGGCTTGGAAGGCAACGAGACACGCACCAAACACAATGTCACGGGCAGCTTTAACGTAGACAAATGGAGACACTACGTCGCCGCTATTGTTCGCAGCTGGGTGACTCTTGTCCGCCGATACCGAAGGAGGGGCTCGAGAAGATATGCTGCTGGTGGCTGGAATGCCAAAGATCTCGTAATATGCCCGAGGTTGACGGAGTGTGGTCAGTCCAAGGCCCACCAGGCTGGTCCCGATGAAATATGCG	A	.	PASS	PRECISE;SVTYPE=DEL;SVMETHOD=EMBL.DELLYv0.7.7;CHR2=unitig_32;END=783189;PE=0;MAPQ=60;CT=3to5;CIPOS=-2,2;CIEND=-2,2;INSLEN=0;HOMLEN=1;SR=10;SRQ=0.994048;CONSENSUS=TTCGGTCTAAACTTCTCTCCTCCCCAGTTCCAAACAACCCAGCCATCAATCACTGCCGCAATGGTCATTGTGCCCACCCAGGGAGAGTATACAGGGGTGGTAAAGTGAAGGACATGGCGGTTCAATGTAAAGTGATCATACGCTTGAAGGGTCGGTGGTACTGTGATG;CE=1.99898	GT:GL:GQ:FT:RCL:RC:RCR:CN:DR:DV:RR:RV	0/0:0,-4.5126,-53.0972:45:PASS:2406:5393:2006:2:0:0:15:0	0/0:0,-8.12471,-98.1969:81:PASS:4279:10118:2621:3:0:0:27:0	1/1:-138.497,-11.1347,0:111:PASS:6176:19:2831:0:0:0:0:37	1/1:-260.989,-21.9644,0:10000:PASS:9331:37:7110:0:0:0:0:73	unitig_32	782917	1765	N	<DEL>	.	.	SVTYPE=DEL;STRANDS=+-:78;SVLEN=-271;END=783188;CIPOS=0,0;CIEND=0,0;CIPOS95=0,0;CIEND95=0,0;SU=78;PE=3;SR=75	GT:SU:PE:SR	./.:0:0:0	./.:0:0:0	./.:30:2:28	./.:48:1:47
unitig_32	794744	796019	-	DEL	-	-	1275	0	0	0	0	1		TM1119_g14327	unitig_32	794744	796019	-	PM1118_GAP	-	-	unitig_32	794746	DEL00003852	G	<DEL>	.	PASS	PRECISE;SVTYPE=DEL;SVMETHOD=EMBL.DELLYv0.7.7;CHR2=unitig_32;END=796020;PE=24;MAPQ=60;CT=3to5;CIPOS=-2,2;CIEND=-2,2;INSLEN=0;HOMLEN=2;SR=10;SRQ=0.952607;CONSENSUS=AACGTTGCGGAACGACATGAGTGCTAGTACTATGATAGCGGTTATAGAGCTTTTAGAGGAGAGTGTGTGAGGTTTGTAATTCATCAGTGGTGGCATTGCCAGAGCAACATCAAATATATTAACACTAGCTCTCTGTTATCCCTACATGTCCTTCTTCTGCTACAGTCTGTCTGTCCTTCCCCACTCCTTTCTTTTTCTGCTTGTTTAAATT;CE=1.95948	GT:GL:GQ:FT:RCL:RC:RCR:CN:DR:DV:RR:RV	./.:0,0,0:0:LowQual:16:0:0:0:0:0:0:0	1/1:-40.4988,-3.31016,0:33:PASS:91:3:196:0:0:24:0:11	./.:0,0,0:0:LowQual:24:0:2:0:0:0:0:0	./.:0,0,0:0:LowQual:34:0:0:0:0:0:0:0	unitig_32	794743	1766	N	<DEL>	.	.	SVTYPE=DEL;STRANDS=+-:30;SVLEN=-1276;END=796019;CIPOS=-4,4;CIEND=-5,2;CIPOS95=0,0;CIEND95=0,0;SU=30;PE=24;SR=6	GT:SU:PE:SR	./.:0:0:0	./.:30:24:6	./.:0:0:0	./.:0:0:0
unitig_32	802254	802802	-	DEL	-	-	548	0	0	0	0	0			unitig_32	802254	802802	-	PM1118_GAP	-	-	unitig_32	802251	DEL00003853	T	<DEL>	.	PASS	PRECISE;SVTYPE=DEL;SVMETHOD=EMBL.DELLYv0.7.7;CHR2=unitig_32;END=802803;PE=20;MAPQ=60;CT=3to5;CIPOS=-3,3;CIEND=-3,3;INSLEN=0;HOMLEN=3;SR=10;SRQ=0.970588;CONSENSUS=AGTATGAGCATATGGTCTCGTGGGGACGACTTTCACTTGCAAGCGGCTTTACAATCTTTACCTTCCATCAAAATGTTGTTGAGCTCCGACATCGAAAGTAGTCAACGTTGGCTGCCAGGCGGTCAGCATATGTCATAGAATGAATTGCTCCCAACGGGTTGACACTCTGCTATCCGGGAAGCTGGGATTTCTGACCCCCTCACT;CE=1.9974	GT:GL:GQ:FT:RCL:RC:RCR:CN:DR:DV:RR:RV	./.:0,0,0:0:LowQual:0:98:70:3:0:0:0:0	1/1:-77.7978,-6.31941,0:63:PASS:46:1:49:0:0:20:0:21	./.:0,0,0:0:LowQual:0:64:54:2:0:0:0:0	0/0:0,-0.300595,-2.99957:5:LowQual:1:268:129:4:1:0:1:0	unitig_32	802248	1719	N	<DEL>	.	.	SVTYPE=DEL;STRANDS=+-:26;SVLEN=-554;END=802802;CIPOS=-5,9;CIEND=-10,9;CIPOS95=0,0;CIEND95=0,0;SU=26;PE=18;SR=8	GT:SU:PE:SR	./.:0:0:0	./.:26:18:8	./.:0:0:0	./.:0:0:0
unitig_32	810763	811964	-	DEL	-	-	1201	1	1	0	2	0	TM1119_g14330;TM1119_g14331		unitig_32	810763	811964	-	PM1118_GAP	-	-	unitig_32	810762	DEL00003854	T	<DEL>	.	PASS	PRECISE;SVTYPE=DEL;SVMETHOD=EMBL.DELLYv0.7.7;CHR2=unitig_32;END=811965;PE=38;MAPQ=60;CT=3to5;CIPOS=-2,2;CIEND=-2,2;INSLEN=0;HOMLEN=1;SR=10;SRQ=0.993865;CONSENSUS=GAAGGGCGAGTACTGCCAGGGAGCACACTGGCAGCAGAAGCCCGGTAAATTCGACAACAAGTACGCGGATGAATACAAATGTGGTGGCTAGCGGCTTATGGTCTATTTCACGAGGACTTCTTGGCATTGGACCCGCCCGGGTTGTCATCAACTTCGGCAAATA;CE=1.98798	GT:GL:GQ:FT:RCL:RC:RCR:CN:DR:DV:RR:RV	0/0:0,-5.71591,-66.4963:57:PASS:132:295:134:2:52:0:19:0	1/1:-106.495,-9.02571,0:90:PASS:136:1:101:0:0:38:0:30	0/0:0,-13.5397,-158.893:135:PASS:246:559:141:3:61:0:45:0	0/0:0,-22.5687,-272.191:10000:PASS:305:636:360:2:122:0:75:0	unitig_32	810762	1767	N	<DEL>	.	.	SVTYPE=DEL;STRANDS=+-:59;SVLEN=-1202;END=811964;CIPOS=-2,0;CIEND=-10,8;CIPOS95=0,0;CIEND95=0,0;SU=59;PE=38;SR=21	GT:SU:PE:SR	./.:0:0:0	./.:59:38:21	./.:0:0:0	./.:0:0:0
unitig_32	976311	976825	-	-	-	DEL	514	0	0	1	1	0	TM1119_g14393		unitig_32	976311	976825	-	-	-	PM449_GAP	unitig_32	976311	DEL00003864	A	<DEL>	.	PASS	IMPRECISE;SVTYPE=DEL;SVMETHOD=EMBL.DELLYv0.7.7;CHR2=unitig_32;END=976826;PE=70;MAPQ=60;CT=3to5;CIPOS=-50,50;CIEND=-50,50	GT:GL:GQ:FT:RCL:RC:RCR:CN:DR:DV:RR:RV	0/0:0,-12.6367,-232.893:126:PASS:58:107:60:2:42:0:0:0	0/0:0,-8.42846,-157.7:84:PASS:42:81:43:2:28:0:0:0	0/0:0,-10.536,-210:105:PASS:57:111:44:2:35:0:0:0	1/1:-397.199,-20.7699,0:10000:PASS:144:0:155:0:0:69:0:0	unitig_32	976310	1770	N	<DEL>	.	.	SVTYPE=DEL;STRANDS=+-:29;SVLEN=-515;END=976825;CIPOS=-1,0;CIEND=-1,0;CIPOS95=0,0;CIEND95=0,0;SU=29;PE=0;SR=29	GT:SU:PE:SR	./.:0:0:0	./.:0:0:0	./.:0:0:0	./.:29:0:29
unitig_32	1021390	1022014	-	DEL	-	-	624	1	0	0	1	0	TM1119_g14407		unitig_32	1021390	1022014	-	PM1118_GAP	-	-	unitig_32	1021389	DEL00003866	C	<DEL>	.	PASS	PRECISE;SVTYPE=DEL;SVMETHOD=EMBL.DELLYv0.7.7;CHR2=unitig_32;END=1022015;PE=48;MAPQ=60;CT=3to5;CIPOS=-1,1;CIEND=-1,1;INSLEN=0;HOMLEN=0;SR=10;SRQ=0.969325;CONSENSUS=ATTTCCATCGGTGAAAAGGGGCGCAGACGTTTTGATTTGGCGGTTCCAAGTTGGAATGCTGAAGGCTTGAAGCCCGTCTCGCAGTGACGTGGACTTAGGGGCTTCCGGGTCATTTTCCAGAATCTGTTTTGCTGTTGCTACATTTTGTTCGAGGTCCGAAAGA;CE=1.96644	GT:GL:GQ:FT:RCL:RC:RCR:CN:DR:DV:RR:RV	0/0:0,-3.30958,-38.6983:33:PASS:77:133:67:2:47:0:11:0	1/1:-137.379,-12.923,0:129:PASS:62:0:141:0:0:48:0:43	0/0:0,-8.72626,-104.996:87:PASS:48:139:147:1:30:0:29:0	0/0:0,-6.91926,-79.9956:69:PASS:201:297:138:2:100:0:23:0	unitig_32	1021384	1773	N	<DEL>	.	.	SVTYPE=DEL;STRANDS=+-:74;SVLEN=-630;END=1022014;CIPOS=0,0;CIEND=-10,9;CIPOS95=0,0;CIEND95=0,0;SU=74;PE=48;SR=26	GT:SU:PE:SR	./.:0:0:0	./.:74:48:26	./.:0:0:0	./.:0:0:0
unitig_32	1023152	1024033	-	DEL	-	-	881	1	0	0	1	0	TM1119_g14408		unitig_32	1023152	1024033	-	PM1118_GAP	-	-	unitig_32	1023147	DEL00003868	A	<DEL>	.	PASS	PRECISE;SVTYPE=DEL;SVMETHOD=EMBL.DELLYv0.7.7;CHR2=unitig_32;END=1024038;PE=24;MAPQ=60;CT=3to5;CIPOS=-6,6;CIEND=-6,6;INSLEN=0;HOMLEN=8;SR=10;SRQ=0.963158;CONSENSUS=TTTCATTATTAATAGCTAAGCATACCAGTTAGGCGTGTGCGTGTCAGATCTCTTGTTTATGGGTGAGAATTTATCTAGAGGGTTTCGCAACGCTCTGGTCTATGCTAGTATCAATGTCCATCATCATGAGAGCATACGATATCAAGATCACAAGCAACTTCTTTGCCCTGCCCGCCTTCAAGAGGCATA;CE=1.98164	GT:GL:GQ:FT:RCL:RC:RCR:CN:DR:DV:RR:RV	0/0:0,-4.2125,-51.2981:42:PASS:111:204:120:2:52:0:14:0	1/1:-43.9988,-3.61113,0:36:PASS:106:4:92:0:0:24:0:12	0/0:0,-6.92022,-81.3965:69:PASS:134:231:197:1:40:0:23:0	0/0:0,-16.5485,-196.592:10000:PASS:226:485:222:2:107:0:55:0	unitig_32	1023151	1774	N	<DEL>	.	.	SVTYPE=DEL;STRANDS=+-:36;SVLEN=-886;END=1024037;CIPOS=-2,1;CIEND=-3,1;CIPOS95=0,0;CIEND95=0,0;SU=36;PE=24;SR=12	GT:SU:PE:SR	./.:0:0:0	./.:36:24:12	./.:0:0:0	./.:0:0:0
unitig_32	1031104	1032974	-	-	-	DEL	1870	1	1	0	2	0	TM1119_g14410;TM1119_g14411		unitig_32	1031104	1032974	-	-	-	PM449_GAP	unitig_32	1031093	DEL00003869	C	<DEL>	.	PASS	PRECISE;SVTYPE=DEL;SVMETHOD=EMBL.DELLYv0.7.7;CHR2=unitig_32;END=1032975;PE=101;MAPQ=60;CT=3to5;CIPOS=-4,4;CIEND=-4,4;INSLEN=0;HOMLEN=3;SR=10;SRQ=0.981707;CONSENSUS=TGGGACGTTTGGAGCATATAATGGACAACGTAAGTGTGCAGGAACCCAGTTTTCAAAACCGGGACTGCTGGATCGCGAGAGCGGTGGCCATGTCGCTCCTCCGCACGGCACTATGGGATATTTGCTGTACGAGGCCCTGTCAAACCTTCTGGATTGGACATGCG;CE=1.98868	GT:GL:GQ:FT:RCL:RC:RCR:CN:DR:DV:RR:RV	0/0:0,-4.81394,-56.6975:48:PASS:227:442:223:2:52:0:16:0	0/0:0,-10.2306,-121.696:102:PASS:145:644:171:4:64:0:34:0	0/0:0,-17.4514,-206.592:10000:PASS:143:822:342:3:69:0:58:0	1/1:-228.09,-19.5571,0:10000:PASS:580:2:515:0:0:101:0:65	unitig_32	1031095	1775	N	<DEL>	.	.	SVTYPE=DEL;STRANDS=+-:153;SVLEN=-1879;END=1032974;CIPOS=0,0;CIEND=0,0;CIPOS95=0,0;CIEND95=0,0;SU=153;PE=101;SR=52	GT:SU:PE:SR	./.:0:0:0	./.:0:0:0	./.:0:0:0	./.:153:101:52
unitig_32	1109206	1109573	-	-	-	DEL	367	0	0	0	0	0			unitig_32	1109206	1109573	-	-	-	PM449_GAP	unitig_32	1109204	DEL00003875	C	<DEL>	.	PASS	PRECISE;SVTYPE=DEL;SVMETHOD=EMBL.DELLYv0.7.7;CHR2=unitig_32;END=1109574;PE=71;MAPQ=60;CT=3to5;CIPOS=-5,5;CIEND=-5,5;INSLEN=0;HOMLEN=6;SR=10;SRQ=0.993939;CONSENSUS=CAGTCGGGGCAAATCTACAACGGCAGCAGTTACAGGAACCGAGATCAGACCCCAGTCCCAGCGAATACAAGCCTCTTGACACTATTCAAAACGTGCATGCGCGTGAAGATTGACATCTTCTCTTTCAATCATTGAAATAGCCGTCTCTCTCCAGCGAGCTCCCTG;CE=1.98271	GT:GL:GQ:FT:RCL:RC:RCR:CN:DR:DV:RR:RV	0/0:0,-3.9119,-47.7985:39:PASS:4394:9499:3423:2:49:0:13:0	0/0:0,-2.40742,-29.2992:24:PASS:2388:4907:2509:2:16:0:8:0	0/0:0,-4.81469,-58.3982:48:PASS:1834:6286:6909:1:13:0:16:0	1/1:-228.592,-18.957,0:10000:PASS:12558:90:12710:0:0:72:0:63	unitig_32	1109205	1778	N	<DEL>	.	.	SVTYPE=DEL;STRANDS=+-:55;SVLEN=-368;END=1109573;CIPOS=0,0;CIEND=0,0;CIPOS95=0,0;CIEND95=0,0;SU=55;PE=13;SR=42	GT:SU:PE:SR	./.:0:0:0	./.:0:0:0	./.:0:0:0	./.:55:13:42
unitig_32	1215671	1225140	-	-	DEL	-	9469	1	0	0	1	2	TM1119_g14469	TM1119_g14467;TM1119_g14468	unitig_32	1215671	1225140	-	-	PM448_GAP	-	unitig_32	1215671	DEL00003879	A	<DEL>	.	PASS	IMPRECISE;SVTYPE=DEL;SVMETHOD=EMBL.DELLYv0.7.7;CHR2=unitig_32;END=1225140;PE=17;MAPQ=60;CT=3to5;CIPOS=-130,130;CIEND=-130,130	GT:GL:GQ:FT:RCL:RC:RCR:CN:DR:DV:RR:RV	0/0:0,-18.0613,-354.5:10000:PASS:1321:2434:1180:2:60:0:0:0	0/0:0,-11.4391,-228:114:PASS:781:1665:783:2:38:0:0:0	1/1:-101.9,-5.1175,0:51:PASS:1071:5:1063:0:0:17:0:0	0/0:0,-31.3071,-624:10000:PASS:2446:5058:2508:2:104:0:0:0	unitig_32	1215669	1785	N	<DEL>	.	.	SVTYPE=DEL;STRANDS=+-:18;SVLEN=-9470;END=1225139;CIPOS=-8,318;CIEND=-376,9;CIPOS95=0,194;CIEND95=-158,0;IMPRECISE;SU=18;PE=18;SR=0	GT:SU:PE:SR	./.:0:0:0	./.:0:0:0	./.:17:17:0	./.:0:0:0
unitig_32	1239028	1239331	-	DEL	-	-	303	0	0	0	0	0	TM1119_g14475		unitig_32	1239028	1239331	-	PM1118_GAP	-	-	unitig_32	1239020	DEL00003883	A	<DEL>	.	PASS	PRECISE;SVTYPE=DEL;SVMETHOD=EMBL.DELLYv0.7.7;CHR2=unitig_32;END=1239336;PE=8;MAPQ=60;CT=3to5;CIPOS=-8,8;CIEND=-8,8;INSLEN=0;HOMLEN=10;SR=10;SRQ=1;CONSENSUS=CCACGATTCGGACCACTCCAAATGCTGCGGCGACGGCAAGAAGTTTCAAGCCATGGTGCTCGGCAACGAAATCTGGCGGCAGGATTCCACGCAACGTTTCACATCTCGCCTCTCAGCGCCGGATAGATGTCTCAAACATATGTTGGTGTGTGAATGAAGTCTTTTGATTATGGGCGATATGATCTAGGGATTGGAA;CE=1.99806	GT:GL:GQ:FT:RCL:RC:RCR:CN:DR:DV:RR:RV	0/0:0,-3.30981,-39.5985:33:PASS:3579:6209:4665:2:40:0:11:0	1/1:-80.2961,-6.91978,0:69:PASS:3271:125:2905:0:1:8:0:23	0/0:0,-11.4342,-135.995:114:PASS:4739:12333:5263:2:33:0:38:0	0/0:0,-23.1689,-275.69:10000:PASS:13028:24283:14347:2:98:0:77:0	unitig_32	1239027	1786	N	<DEL>	.	.	SVTYPE=DEL;STRANDS=+-:18;SVLEN=-308;END=1239335;CIPOS=-10,9;CIEND=-10,9;CIPOS95=0,0;CIEND95=0,0;SU=18;PE=1;SR=17	GT:SU:PE:SR	./.:0:0:0	./.:18:1:17	./.:0:0:0	./.:0:0:0
unitig_32	1253749	1253864	DEL	DEL	-	DEL	115	0	0	0	0	0			unitig_32	1253749	1253864	PA7_GAP	PM1118_GAP	-	PM449_GAP	unitig_32	1253743	DEL00003885	GACTGTTGAAACAGGGTGGTAAGGTAGGTTAGGTTAATTTGTAATAATACAAGTCTGAGTTCTACTACAGTCTGAGGAGCCCTCCAAGCCTTATATAGGACAGGACCCCTGTCCCCCAACTC	G	.	PASS	PRECISE;SVTYPE=DEL;SVMETHOD=EMBL.DELLYv0.7.7;CHR2=unitig_32;END=1253865;PE=0;MAPQ=60;CT=3to5;CIPOS=-6,6;CIEND=-6,6;INSLEN=0;HOMLEN=6;SR=10;SRQ=0.991803;CONSENSUS=AATGCGAAAACGAAAAGCAAAAAGGAGATGTATTGTCGAGGTAGATATTTACTATGACTGTAAATAGTGCGCTGTGACTATCTCGCCTGTGCAAAATCCTTGTTGTTGAAGTGAAATTGGGT;CE=1.93088	GT:GL:GQ:FT:RCL:RC:RCR:CN:DR:DV:RR:RV	1/1:-83.3938,-7.21849,0:72:PASS:1746:133:1431:0:0:0:0:24	1/1:-72.8962,-6.31778,0:63:PASS:717:52:1501:0:0:0:0:21	0/0:0,-4.21271,-50.5983:42:PASS:762:1945:1231:2:0:0:14:0	1/1:-251.192,-20.7633,0:10000:PASS:3785:285:3438:0:0:0:0:69	unitig_32	1253748	1787	N	<DEL>	.	.	SVTYPE=DEL;STRANDS=+-:88;SVLEN=-116;END=1253864;CIPOS=0,0;CIEND=0,0;CIPOS95=0,0;CIEND95=0,0;SU=88;PE=0;SR=88	GT:SU:PE:SR	./.:18:0:18	./.:12:0:12	./.:0:0:0	./.:58:0:58
unitig_32	1282175	1282308	-	DEL	-	-	133	0	0	0	0	0			unitig_32	1282175	1282308	-	PM1118_GAP	-	-	unitig_32	1282166	DEL00003888	ATGAAGTAGCGAGATCCCTGGCAGCAGTAGACTACTATTATTGTTTACATCCCTGGCCCTGAGGTAACCTGACAGTCTCTTCTCAGCTGTCGCTAGCATGCGTTCGTCAGAGTATATTCAACCATGTAGGAGGT	A	.	PASS	PRECISE;SVTYPE=DEL;SVMETHOD=EMBL.DELLYv0.7.7;CHR2=unitig_32;END=1282300;PE=0;MAPQ=60;CT=3to5;CIPOS=-4,4;CIEND=-4,4;INSLEN=0;HOMLEN=3;SR=10;SRQ=0.989583;CONSENSUS=TTTAACACAGTAAAATGTTCTCAATAAATAGTTCTCTTTCTGATGCTTGTAGGCTTTTGTGACAGGACTAACTAATAGCAGTGAAGAGGCTTCTACAGCATAAATTAGAATTCAGGTTCTCAAGGCTTTCTCTGAGTCATGGAACGAGAAGACTGTCAACGACTCAGGTGCCACAGGTGAACGGAGTTGTTG;CE=1.96966	GT:GL:GQ:FT:RCL:RC:RCR:CN:DR:DV:RR:RV	0/0:0,-4.51291,-55.1975:45:PASS:1474:3250:1946:2:0:0:15:0	1/1:-44.3987,-3.61109,0:36:PASS:544:15:931:0:0:0:0:12	0/0:0,-2.10659,-26.2994:21:PASS:401:1037:680:2:0:0:7:0	0/0:0,-21.0646,-257.192:10000:PASS:6704:13085:6039:2:0:0:70:0	unitig_32	1282167	1788	N	<DEL>	.	.	SVTYPE=DEL;STRANDS=+-:8;SVLEN=-132;END=1282299;CIPOS=-10,9;CIEND=-10,9;CIPOS95=0,0;CIEND95=0,0;SU=8;PE=0;SR=8	GT:SU:PE:SR	./.:0:0:0	./.:8:0:8	./.:0:0:0	./.:0:0:0
unitig_32	1476344	1478567	DEL	-	-	-	2223	0	0	0	0	0			unitig_32	1476344	1478567	PA7_GAP	-	-	-	unitig_32	1476343	DEL00003894	A	<DEL>	.	PASS	PRECISE;SVTYPE=DEL;SVMETHOD=EMBL.DELLYv0.7.7;CHR2=unitig_32;END=1478566;PE=51;MAPQ=60;CT=3to5;CIPOS=-1,1;CIEND=-1,1;INSLEN=0;HOMLEN=0;SR=10;SRQ=0.960938;CONSENSUS=AATAACTGCTTCACGCGCGTCATGTTCCGAGACCTGAAACCATTCATCATGTTGAGTACTGCAACCCATGACTCGTCTCTTCAGCTGTGCTCGTGAAAGAGATTGGTTTTGTTCTCTAGCAGACTGCT;CE=1.98548	GT:GL:GQ:FT:RCL:RC:RCR:CN:DR:DV:RR:RV	1/1:-61.8961,-5.41465,0:54:PASS:264:0:281:0:0:51:0:18	0/0:0,-6.01611,-69.8955:60:PASS:151:405:306:2:25:0:20:0	0/0:0,-4.21215,-48.5977:42:PASS:179:583:459:2:39:0:14:0	0/0:0,-19.8595,-238.192:10000:PASS:651:1220:607:2:109:0:66:0	unitig_32	1476343	1793	N	<DEL>	.	.	SVTYPE=DEL;STRANDS=+-:57;SVLEN=-2224;END=1478567;CIPOS=-3,5;CIEND=-7,2;CIPOS95=0,0;CIEND95=0,0;SU=57;PE=52;SR=5	GT:SU:PE:SR	./.:57:52:5	./.:0:0:0	./.:0:0:0	./.:0:0:0
unitig_32	1485278	1489361	DEL	-	-	DEL	4083	0	0	0	0	0			unitig_32	1485278	1489361	PA7_GAP	-	-	PM449_GAP	unitig_32	1485278	DEL00003895	G	<DEL>	.	PASS	IMPRECISE;SVTYPE=DEL;SVMETHOD=EMBL.DELLYv0.7.7;CHR2=unitig_32;END=1489397;PE=72;MAPQ=60;CT=3to5;CIPOS=-81,81;CIEND=-81,81	GT:GL:GQ:FT:RCL:RC:RCR:CN:DR:DV:RR:RV	1/1:-161.797,-9.63045,0:96:PASS:472:18:563:0:0:32:0:0	0/0:0,-7.82677,-156:78:PASS:285:542:359:2:26:0:0:0	1/1:-48.2998,-2.70911,0:27:PASS:284:64:373:0:0:9:0:0	1/1:-365.191,-21.6652,0:10000:PASS:1273:74:1294:0:0:72:0:0	unitig_32	1485277	1794	N	<DEL>	.	.	SVTYPE=DEL;STRANDS=+-:120;SVLEN=-4118;END=1489395;CIPOS=-10,229;CIEND=-151,0;CIPOS95=-1,44;CIEND95=-62,1;IMPRECISE;SU=120;PE=120;SR=0	GT:SU:PE:SR	./.:32:32:0	./.:0:0:0	./.:10:10:0	./.:78:78:0
unitig_32	1630527	1631541	DEL	DEL	DEL	-	1014	0	0	0	0	0			unitig_32	1630527	1631541	PA7_GAP	PM1118_GAP	PM448_GAP	-	unitig_32	1630522	DEL00003901	C	<DEL>	.	PASS	IMPRECISE;SVTYPE=DEL;SVMETHOD=EMBL.DELLYv0.7.7;CHR2=unitig_32;END=1631542;PE=53;MAPQ=60;CT=3to5;CIPOS=-50,50;CIEND=-50,50	GT:GL:GQ:FT:RCL:RC:RCR:CN:DR:DV:RR:RV	1/1:-292.7,-15.3523,0:154:PASS:131:0:126:0:0:51:0:0	1/1:-75.0999,-3.9133,0:39:PASS:56:3:80:0:0:13:0:0	1/1:-53.9,-2.70927,0:27:PASS:31:2:157:0:0:9:0:0	0/0:0,-34.9184,-684.599:10000:PASS:292:496:267:2:116:0:0:0	unitig_32	1630526	1795	N	<DEL>	.	.	SVTYPE=DEL;STRANDS=+-:105;SVLEN=-1015;END=1631541;CIPOS=-2,0;CIEND=-10,9;CIPOS95=0,0;CIEND95=0,0;SU=105;PE=77;SR=28	GT:SU:PE:SR	./.:58:54:4	./.:26:14:12	./.:21:9:12	./.:0:0:0
unitig_32	1713823	1714150	-	-	DEL	-	327	1	0	0	1	0	TM1119_g14637		unitig_32	1713823	1714150	-	-	PM448_GAP	-	unitig_32	1713816	DEL00003911	C	<DEL>	.	PASS	PRECISE;SVTYPE=DEL;SVMETHOD=EMBL.DELLYv0.7.7;CHR2=unitig_32;END=1714151;PE=24;MAPQ=60;CT=3to5;CIPOS=-7,7;CIEND=-7,7;INSLEN=0;HOMLEN=6;SR=10;SRQ=0.987879;CONSENSUS=TGTGCAGCCAGGAACTCGGTCAGTCGAATGACGGCCGTTTTCGCGGTTTGGTAACTCATGAAAGAAGCATATGGGCTCCCGAGCTGCAATGGCGATTTTTGAGCAACCAGCTCTGGCAAAGCTCAAGGCGGTCACTCGGCCGATGCCCTTAGACGCTCCTGTGA;CE=1.99002	GT:GL:GQ:FT:RCL:RC:RCR:CN:DR:DV:RR:RV	0/0:0,-3.3101,-40.7988:33:PASS:3278:7457:3688:2:45:0:11:0	0/0:0,-7.52266,-89.4969:75:PASS:5149:10168:4124:2:34:0:25:0	1/1:-187.494,-15.6471,0:157:PASS:4613:139:7155:0:0:24:0:52	0/0:0,-18.0539,-216.892:10000:PASS:12139:22244:12132:2:82:1:60:0	unitig_32	1713822	1799	N	<DEL>	.	.	SVTYPE=DEL;STRANDS=+-:49;SVLEN=-328;END=1714150;CIPOS=0,0;CIEND=0,0;CIPOS95=0,0;CIEND95=0,0;SU=49;PE=10;SR=39	GT:SU:PE:SR	./.:0:0:0	./.:0:0:0	./.:48:9:39	./.:1:1:0
unitig_32	1824877	1830874	DEL	DEL	DEL	DEL	5997	1	1	0	2	0	TM1119_g14678;TM1119_g14679		unitig_32	1824877	1830874	PA7_GAP	PM1118_GAP	PM448_GAP	PM449_GAP	unitig_32	1824871	DEL00003917	G	<DEL>	.	PASS	PRECISE;SVTYPE=DEL;SVMETHOD=EMBL.DELLYv0.7.7;CHR2=unitig_32;END=1830875;PE=49;MAPQ=60;CT=3to5;CIPOS=-7,7;CIEND=-7,7;INSLEN=0;HOMLEN=8;SR=10;SRQ=0.991304;CONSENSUS=AGGGACAAGTTCCCGTCTTGTTCCAGGTGTGGAGAGAAGTTATACCCTTGGTGTCTTAGTACAGGCAAACTATGGGAAGAAGGATGCCTTCAGGATTGGCAATGTCCCAGTAGGT;CE=1.97721	GT:GL:GQ:FT:RCL:RC:RCR:CN:DR:DV:RR:RV	1/1:-73.9975,-6.01807,0:60:PASS:832:28:752:0:0:49:0:20	1/1:-76.3966,-3.72121,0:37:PASS:629:42:888:0:0:34:1:23	1/1:-96.195,-8.42384,0:84:PASS:835:2:1325:0:0:61:0:28	1/1:-168.595,-13.8422,0:138:PASS:1545:28:1488:0:0:74:0:46	unitig_32	1824876	1803	N	<DEL>	.	.	SVTYPE=DEL;STRANDS=+-:303;SVLEN=-5998;END=1830874;CIPOS=0,0;CIEND=0,0;CIPOS95=0,0;CIEND95=0,0;SU=303;PE=220;SR=83	GT:SU:PE:SR	./.:64:49:15	./.:50:34:16	./.:80:61:19	./.:109:76:33
unitig_32	1879667	1879975	DEL	DEL	DEL	DEL	308	0	0	0	0	0			unitig_32	1879667	1879975	PA7_GAP	PM1118_GAP	PM448_GAP	PM449_GAP	unitig_32	1879660	DEL00003920	T	<DEL>	.	PASS	PRECISE;SVTYPE=DEL;SVMETHOD=EMBL.DELLYv0.7.7;CHR2=unitig_32;END=1879976;PE=62;MAPQ=60;CT=3to5;CIPOS=-6,6;CIEND=-6,6;INSLEN=0;HOMLEN=6;SR=10;SRQ=0.993789;CONSENSUS=ACTACCTCCACCAGCTAACAAAAAGGAGGCGTTTTTGAGGTTCTGGTCCGGACAAAAGTAAAGAATTGATTCAAGCTGCACTAAGACTAGAGCCCCGGCATCGTGAAAGCCGCCAAGTTTTCTAATCCTCCATCGGCGTATCCTTGCAAATCGGATTTACAG;CE=1.98995	GT:GL:GQ:FT:RCL:RC:RCR:CN:DR:DV:RR:RV	1/1:-41.9977,-3.61007,0:36:PASS:3705:10:2884:0:0:41:0:12	1/1:-100.896,-5.92694,0:59:PASS:4636:473:5448:0:2:15:1:29	1/1:-146.695,-12.3369,0:123:PASS:7246:80:8706:0:0:59:0:41	1/1:-225.991,-19.2571,0:10000:PASS:12041:139:10533:0:1:61:0:64	unitig_32	1879662	1804	N	<DEL>	.	.	SVTYPE=DEL;STRANDS=+-:120;SVLEN=-313;END=1879975;CIPOS=0,0;CIEND=0,0;CIPOS95=0,0;CIEND95=0,0;SU=120;PE=9;SR=111	GT:SU:PE:SR	./.:6:0:6	./.:18:0:18	./.:42:9:33	./.:54:0:54
unitig_32	2000348	2000502	-	-	-	DEL	154	0	0	0	0	0			unitig_32	2000348	2000502	-	-	-	PM449_GAP	unitig_32	2000339	DEL00003928	CCCGGGTCTGAAGCGTGACAAGCTTCCATACTAACCACTATACTACGAGAGATGTGTGTCCTGATTGGACGAGATGATTGACCATTTTGCCGGTATCGTAGCTTATGGTACTGTACTGGTCGAGTAGGTAGGTCGCTTAGTGACCGCAGACTTTTCTCGCTCTA	C	.	PASS	PRECISE;SVTYPE=DEL;SVMETHOD=EMBL.DELLYv0.7.7;CHR2=unitig_32;END=2000503;PE=0;MAPQ=60;CT=3to5;CIPOS=-9,9;CIEND=-9,9;INSLEN=0;HOMLEN=8;SR=10;SRQ=0.993506;CONSENSUS=ACCGTAGGTGAAGGCTCCGGATGGATAAAAAAAAGACAGAAAAATAAAGAAATCTCTCTCTCGCCGGGGATCGAGCCCGGGTCTCCACTGAAGCCACTACGACAAGATCGGTCTTTCTTAGCCGGGCCACTGAAACGCAGGCTATGTGCGGTAT;CE=1.98077	GT:GL:GQ:FT:RCL:RC:RCR:CN:DR:DV:RR:RV	0/0:0,-3.91179,-46.9984:39:PASS:2275:3642:2027:2:0:0:13:0	0/0:0,-5.11388,-59.6964:51:PASS:1344:3203:3097:1:0:0:17:0	0/0:0,-9.32779,-112.396:93:PASS:2103:5617:4630:2:0:0:31:0	1/1:-194.987,-16.8449,0:10000:PASS:4921:275:4713:0:0:0:0:56	unitig_32	2000347	1807	N	<DEL>	.	.	SVTYPE=DEL;STRANDS=+-:51;SVLEN=-155;END=2000502;CIPOS=0,0;CIEND=0,0;CIPOS95=0,0;CIEND95=0,0;SU=51;PE=1;SR=50	GT:SU:PE:SR	./.:0:0:0	./.:0:0:0	./.:0:0:0	./.:51:1:50
unitig_32	2005022	2006042	-	-	-	DEL	1020	0	0	1	1	0	TM1119_g14750		unitig_32	2005022	2006042	-	-	-	PM449_GAP	unitig_32	2005021	DEL00003930	G	<DEL>	.	PASS	PRECISE;SVTYPE=DEL;SVMETHOD=EMBL.DELLYv0.7.7;CHR2=unitig_32;END=2006043;PE=94;MAPQ=60;CT=3to5;CIPOS=-2,2;CIEND=-2,2;INSLEN=0;HOMLEN=1;SR=10;SRQ=1;CONSENSUS=CTAGCATAATGTGTTCTTACAATCGTCTGAATGAAGTCTATTCCTGCGAAAACTCGGAGCTTTTGACAAATATCACAAGGGGACAGAACCGGTGACAGACGCAGGTTCTTGGCAGTCGGATTTTGTGGAAGGGTTGTTAATCGATTACCGGCGATATGATGC;CE=1.98254	GT:GL:GQ:FT:RCL:RC:RCR:CN:DR:DV:RR:RV	0/0:0,-6.61933,-78.6967:66:PASS:155:264:144:2:56:0:22:0	0/0:0,-9.02709,-107.596:90:PASS:119:365:82:4:52:0:30:0	0/0:0,-15.9472,-188.793:157:PASS:230:531:165:3:82:1:53:0	1/1:-291.288,-24.3716,0:10000:PASS:276:2:296:0:0:94:0:81	unitig_32	2005021	1808	N	<DEL>	.	.	SVTYPE=DEL;STRANDS=+-:157;SVLEN=-1021;END=2006042;CIPOS=0,0;CIEND=0,0;CIPOS95=0,0;CIEND95=0,0;SU=157;PE=96;SR=61	GT:SU:PE:SR	./.:0:0:0	./.:0:0:0	./.:1:1:0	./.:156:95:61
unitig_32	2030592	2030720	-	-	-	DEL	128	0	0	0	0	0			unitig_32	2030592	2030720	-	-	-	PM449_GAP	unitig_32	2030586	DEL00003934	GCGTGGGTTGTATGGCTTAATTGACGGAATTTACATGGCCGAGGCCAATCAGCACCACCTGCCTGCACCTTGAGCCAATTCTATGCGTGTTTGAGGCTCTTATGGCTGGGCCGGGCCCTTAAGGCTCACTGT	G	.	PASS	PRECISE;SVTYPE=DEL;SVMETHOD=EMBL.DELLYv0.7.7;CHR2=unitig_32;END=2030718;PE=0;MAPQ=60;CT=3to5;CIPOS=-11,11;CIEND=-11,11;INSLEN=0;HOMLEN=11;SR=10;SRQ=0.97561;CONSENSUS=GTGCCAGTCCTGGGCATGGCCTTAAAGGAGCCTTGTTGTGTTGTAGAGTGTGAAGTAAACTATTGTGTGTTGCATGGGTTGTAGTAGCATCTTCTCAGCTGCGGGATCTCAAGGCTCCGTAAAGACGCAAGGCTTCTTCACTACTACCAGACACTTTGTGTCTT;CE=1.97722	GT:GL:GQ:FT:RCL:RC:RCR:CN:DR:DV:RR:RV	0/0:0,-3.00853,-35.8982:30:PASS:2177:4212:1847:2:0:0:10:0	0/0:0,-1.20357,-14.0994:12:LowQual:1243:1862:685:2:0:0:4:0	0/0:0,-3.00891,-36.3986:30:PASS:712:3060:1724:3:0:0:10:0	1/1:-245.392,-20.1609,0:10000:PASS:4028:428:4534:0:0:0:0:67	unitig_32	2030597	1809	N	<DEL>	.	.	SVTYPE=DEL;STRANDS=+-:59;SVLEN=-123;END=2030720;CIPOS=0,0;CIEND=0,0;CIPOS95=0,0;CIEND95=0,0;SU=59;PE=1;SR=58	GT:SU:PE:SR	./.:0:0:0	./.:0:0:0	./.:0:0:0	./.:59:1:58
unitig_32	2102499	2102729	-	-	-	DEL	230	0	1	0	1	0	TM1119_g14781		unitig_32	2102499	2102729	-	-	-	PM449_GAP	unitig_32	2102490	DEL00003943	AGAATGGTGAGGATGCTGGCATCGACCCAGGTATAGAGGATCTTGACTACGACACCGCCAGCGCATGGCCGTGGAGTTGCTATCGTCCTGACGTGAAGAGGGTGACCAGCTTCTTCGAGAATGACTGCACTCATCGTCTCTGGAACGTCTGGCATGGTGGAGACTGACTTCGAGTGTGTTACGGGACTAGTTGTTAAGTCCTGAATGTAAGCTTCACAATGAAGGTTACGAAGATGATGT	A	.	PASS	PRECISE;SVTYPE=DEL;SVMETHOD=EMBL.DELLYv0.7.7;CHR2=unitig_32;END=2102730;PE=0;MAPQ=60;CT=3to5;CIPOS=-9,9;CIEND=-9,9;INSLEN=0;HOMLEN=9;SR=10;SRQ=0.987879;CONSENSUS=GCTGCGATGCGGCCGATTGCCCGTGTGCCAGGCACCATGGGAATTGGAAAAGAAAATGAGGGTGCTTTTCCGGAGAGAATGGTGGTTTCTTTTCGGGACATCGTATCGACGAACGATCCTTAACGAGGCTTGACCAGATCAACAATTCATGAAATCCGACGGGGA;CE=1.98574	GT:GL:GQ:FT:RCL:RC:RCR:CN:DR:DV:RR:RV	0/0:0,-4.81462,-58.4981:48:PASS:3113:6007:2565:2:0:0:16:0	0/0:0,-8.1239,-95.3961:81:PASS:7339:6546:2002:1:0:0:27:0	0/0:0,-9.3283,-113.096:93:PASS:8670:8721:2167:2:0:0:31:0	1/1:-184.993,-15.346,0:154:PASS:7333:260:8079:0:0:0:0:51	unitig_32	2102498	1810	N	<DEL>	.	.	SVTYPE=DEL;STRANDS=+-:42;SVLEN=-231;END=2102729;CIPOS=0,0;CIEND=0,0;CIPOS95=0,0;CIEND95=0,0;SU=42;PE=0;SR=42	GT:SU:PE:SR	./.:0:0:0	./.:0:0:0	./.:0:0:0	./.:42:0:42
unitig_32	2130092	2132264	-	DEL	-	-	2172	0	0	0	0	0			unitig_32	2130092	2132264	-	PM1118_GAP	-	-	unitig_32	2130088	DEL00003945	T	<DEL>	.	PASS	PRECISE;SVTYPE=DEL;SVMETHOD=EMBL.DELLYv0.7.7;CHR2=unitig_32;END=2132265;PE=9;MAPQ=60;CT=3to5;CIPOS=-5,5;CIEND=-5,5;INSLEN=0;HOMLEN=4;SR=10;SRQ=1;CONSENSUS=CATGTAGCAAGATCGAAAGGGGCGCCTTTGTAGTTACTAGCACTTCTGAAATCCTCGTTTATACCACTGTTGAAATTCGAGATTGACTCTGCCACCATTCCACGGAGAATATTATCAAGGCCAGTCGCGAGGAAACCTCCAAGAGCATCGGACTTTATATATATGTAAGAGTGTGAACCCAATGACATATTATTGTCTCTCTACATCTGCTAATTGGTAGATAATCAAGATATCTTCACTTTCA…	GT:GL:GQ:FT:RCL:RC:RCR:CN:DR:DV:RR:RV	0/0:0,-2.707,-32.0977:27:PASS:302:461:278:2:25:0:9:0	1/1:-22.4995,-1.80565,0:18:PASS:116:6:331:0:0:9:0:6	0/0:0,-0.90296,-11.9999:10:LowQual:98:231:322:1:9:0:3:0	0/0:0,-11.1332,-134.795:111:PASS:643:1230:581:2:123:0:37:0	unitig_32	2130091	1813	N	<DEL>	.	.	SVTYPE=DEL;STRANDS=+-:12;SVLEN=-2173;END=2132264;CIPOS=-6,9;CIEND=-10,7;CIPOS95=-1,1;CIEND95=-1,0;IMPRECISE;SU=12;PE=9;SR=3	GT:SU:PE:SR	./.:0:0:0	./.:12:9:3	./.:0:0:0	./.:0:0:0
unitig_32	2131515	2132011	DEL	-	-	-	496	0	0	0	0	0			unitig_32	2131515	2132011	PA7_GAP	-	-	-	unitig_32	2131514	DEL00003946	T	<DEL>	.	PASS	PRECISE;SVTYPE=DEL;SVMETHOD=EMBL.DELLYv0.7.7;CHR2=unitig_32;END=2132009;PE=66;MAPQ=60;CT=3to5;CIPOS=-2,2;CIEND=-2,2;INSLEN=0;HOMLEN=1;SR=10;SRQ=0.990566;CONSENSUS=CACATCACATGTCTCCAAGCCATGGGTTCTTTGTACCCGAGATCTTATTCTTGGTTTAGCAGTAAGCTGGGGTTCTCGGCCTGTCGAGAGTTTAAAACAACTATGG;CE=1.98604	GT:GL:GQ:FT:RCL:RC:RCR:CN:DR:DV:RR:RV	1/1:-75.2966,-6.31826,0:63:PASS:7333:1:5725:0:0:65:0:21	./.:0,0,0:0:LowQual:12:0:0:0:0:0:0:0	0/0:0,-2.70838,-33.4991:27:PASS:2904:5277:1789:2:4:0:9:0	0/0:0,-20.7636,-252.393:10000:PASS:21160:39416:20790:2:102:0:69:0	unitig_32	2131514	1812	N	<DEL>	.	.	SVTYPE=DEL;STRANDS=+-:75;SVLEN=-497;END=2132011;CIPOS=-10,9;CIEND=-10,6;CIPOS95=0,0;CIEND95=0,0;SU=75;PE=63;SR=12	GT:SU:PE:SR	./.:75:63:12	./.:0:0:0	./.:0:0:0	./.:0:0:0
unitig_32	2150507	2150733	-	DEL	-	DEL	226	0	0	0	0	0			unitig_32	2150507	2150733	PA7_GAP	PM1118_GAP	-	PM449_GAP	unitig_32	2150502	DEL00003950	CACGTTGAGTTGGGGGAGTAGGGTCTTACCCCTGCCAGCAGTCAGGTGACTTATTTGCTATTACTTACTTCATTTTTACTTGCTTCACTTAGCTATCATTACGCGGAATATAAGAATGACTACCCCTTTCATTCCATTACGTTTTTCATGCCCAGGATGCTTCGTTTGTGTGTGTGCTATGTGATATCTTGAGAGGGTGTTGGTCAGCAGTAGGCACTGCTGCCCTGTTTCA	C	.	PASS	PRECISE;SVTYPE=DEL;SVMETHOD=EMBL.DELLYv0.7.7;CHR2=unitig_32;END=2150734;PE=0;MAPQ=60;CT=3to5;CIPOS=-5,5;CIEND=-5,5;INSLEN=0;HOMLEN=4;SR=10;SRQ=0.954198;CONSENSUS=AACCTAGCATTGCATCTGCTTACTCGATCACAGGCGCAACCCTAGGTTGTGAGTTGCACGTGCACGTGGTTACCGGACCATTTCAGCATTTTGAATCTTCTTTAACTCTCCAGCTCTTGGTCATTACATT;CE=1.97079	GT:GL:GQ:FT:RCL:RC:RCR:CN:DR:DV:RR:RV	1/1:-54.2981,-4.5135,0:45:PASS:2781:53:1977:0:0:0:0:15	1/1:-69.798,-5.71761,0:57:PASS:2033:64:1597:0:0:0:0:19	1/1:-96.5974,-7.82418,0:78:PASS:2369:83:1667:0:0:0:0:26	1/1:-280.292,-22.8704,0:10000:PASS:7580:224:8966:0:0:0:0:76	unitig_32	2150506	1814	N	<DEL>	.	.	SVTYPE=DEL;STRANDS=+-:62;SVLEN=-227;END=2150733;CIPOS=0,0;CIEND=0,0;CIPOS95=0,0;CIEND95=0,0;SU=62;PE=1;SR=61	GT:SU:PE:SR	./.:3:0:3	./.:9:0:9	./.:14:0:14	./.:36:1:35
unitig_4	331335	331466	-	-	-	DEL	131	0	0	0	0	0			unitig_4	331335	331466	-	-	-	PM449_GAP	unitig_4	331334	DEL00002688	GTGTGAAATACCAACAGGCTTCAAACCGTTCTTAGAGGGTTGGGTCAGACCCATTGTGATATTGTGTTGTCTTGTTAGCACCTCCGGTCTACTCTCAAACTTTCCTCATATCACTTTACAACAGTCTCCTT	G	.	PASS	PRECISE;SVTYPE=DEL;SVMETHOD=EMBL.DELLYv0.7.7;CHR2=unitig_4;END=331465;PE=0;MAPQ=60;CT=3to5;CIPOS=-1,1;CIEND=-1,1;INSLEN=0;HOMLEN=0;SR=10;SRQ=0.971098;CONSENSUS=AAGAGCAAATGGTGATGTTTGCGATTTCAAAATCCGTTCCGTCCCTCGGATTTGTCATGCCAGTCTTCACAGAAACCATTAGAACATGGACGAGTATACCTTACGGATTTGGTCCATCATCGAAAGTCGACAGAATTCGAATTGAACTTGACCATTTGACATTGACAACTCG;CE=1.98256	GT:GL:GQ:FT:RCL:RC:RCR:CN:DR:DV:RR:RV	0/0:0,-2.70817,-32.6989:27:PASS:1946:2948:1244:2:0:0:9:0	0/0:0,-6.61981,-79.0971:66:PASS:1151:3034:3039:1:0:0:22:0	0/0:0,-8.72519,-101.795:87:PASS:2986:2982:3741:1:0:0:29:0	1/1:-168.594,-14.1425,0:141:PASS:3320:1:2831:0:0:0:0:47	unitig_4	331334	1300	N	<DEL>	.	.	SVTYPE=DEL;STRANDS=+-:36;SVLEN=-132;END=331466;CIPOS=-1,0;CIEND=-1,0;CIPOS95=0,0;CIEND95=0,0;SU=36;PE=0;SR=36	GT:SU:PE:SR	./.:0:0:0	./.:0:0:0	./.:0:0:0	./.:36:0:36
unitig_4	435888	436101	DEL	DEL	DEL	-	213	0	0	0	0	0			unitig_4	435888	436101	PA7_GAP	PM1118_GAP	PM448_GAP		unitig_4	435882	DEL00002701	TATTATTGTAAGGCCCACGTCCGGGGAATAGGATAGTATCACGGGCTTTGACCGGCTACGCTTCACGTAGGCTTCCTGAAGCTGTGCTGTGCATTCGTTCTGTATTGTTGTTCTCTAGCTAAACTATGCATCCTCCAGAAGTGACGAGCTAAGTAGGAGCTTAGGTAGAGCTAGTGGCAGGCTTACATAAGCCGTTCGTCTGTCCTTCATCCTCACAACA	T	.	PASS	PRECISE;SVTYPE=DEL;SVMETHOD=EMBL.DELLYv0.7.7;CHR2=unitig_4;END=436102;PE=0;MAPQ=60;CT=3to5;CIPOS=-9,9;CIEND=-9,9;INSLEN=0;HOMLEN=9;SR=10;SRQ=0.985507;CONSENSUS=TATAATACTGCTCTGTATGAATAATTGGAAGTGAACTTCTTAAGTTAGTGTATCCGCTCCAATATTATCTGTGGCAAGCAATTGAAGGGTCTTTGAAACAGGCCTCGTTTCTCGGACTATACCCATTGATTGACCCCC;CE=1.96978	GT:GL:GQ:FT:RCL:RC:RCR:CN:DR:DV:RR:RV	1/1:-41.9992,-3.31051,0:33:PASS:2568:71:2097:0:0:0:0:11	1/1:-42.7984,-0.312765,0:5:LowQual:1349:78:1424:0:0:0:1:13	1/1:-25.2992,-2.10637,0:21:PASS:1191:32:1964:0:0:0:0:7	1/1:-247.291,-20.4613,0:10000:PASS:7565:265:6947:0:0:0:0:68	unitig_4	435887	1303	N	<DEL>	.	.	SVTYPE=DEL;STRANDS=+-:75;SVLEN=-214;END=436101;CIPOS=0,0;CIEND=0,0;CIPOS95=0,0;CIEND95=0,0;SU=75;PE=0;SR=75	GT:SU:PE:SR	./.:7:0:7	./.:10:0:10	./.:6:0:6	./.:52:0:52
[truncated: 152 more rows]

## Sheet: B - Genes entirely deleted
		Structural variations				UCR-PA7		Pm1118		Pm448		Pm449		Pm1119
[truncated: 149 more rows]

## Sheet: C - Genes partially deleted
		Structural variations				UCR-PA7		Pm1118		Pm448		Pm449		Pm1119
[truncated: 198 more rows]

## Sheet: D - Enrichment entirely deleted
UCR-PA7
[truncated: 56 more rows]

## Sheet: E- Enrichment partially deleted
UCR-PA7
[truncated: 32 more rows]
